# Supplementary material for: Large-scale molecular phylogeny, morphology, divergence-time estimation, and the fossil record of advanced caenophidian snakes (Squamata: Serpentes)
Source: PubMed Central journal article supplement (PMC6512042; doi:10.1371/journal.pone.0216148), 2019-05-10

## **S1 Appendix**

Fig. A

Tropidophiidae

*Tropidophis nigriventris*

Acrochordidae

*Acrochordus granulatus*

Lateral

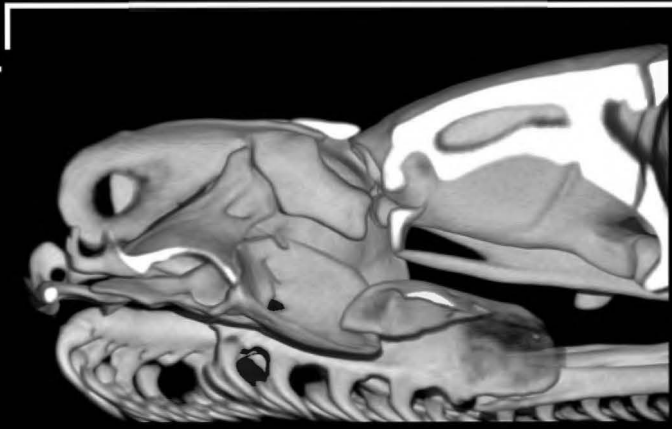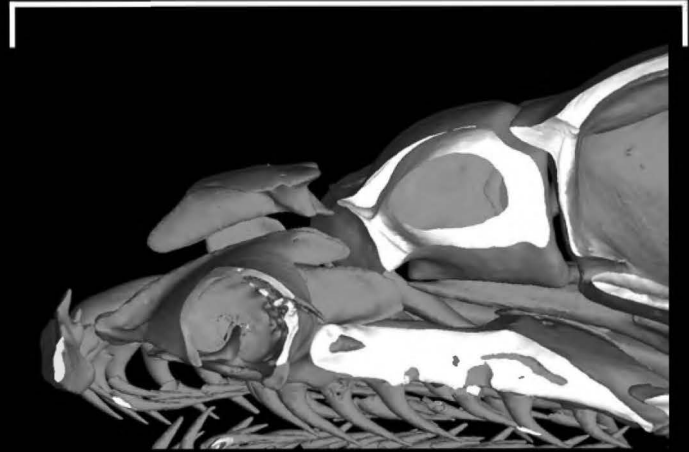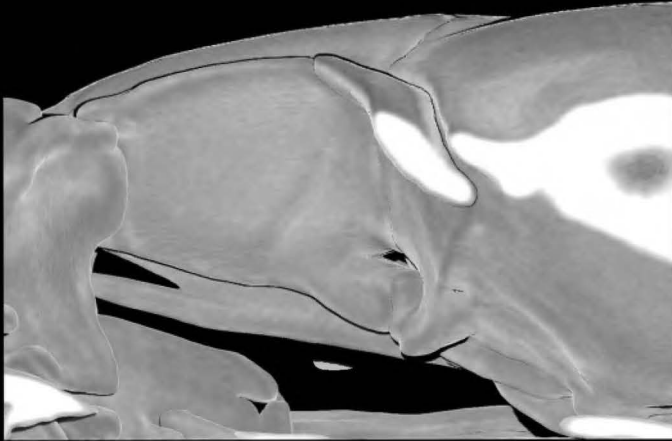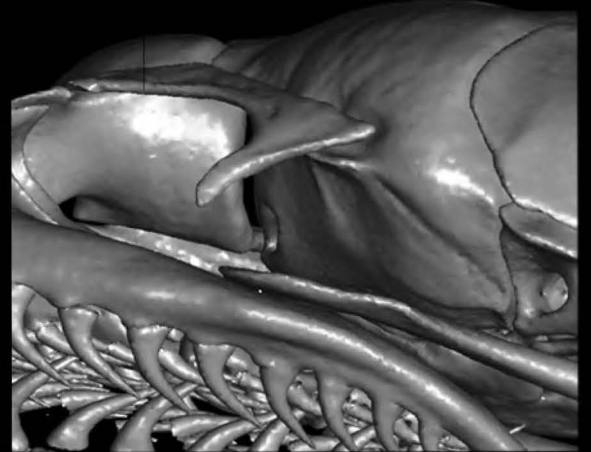

Dorsal

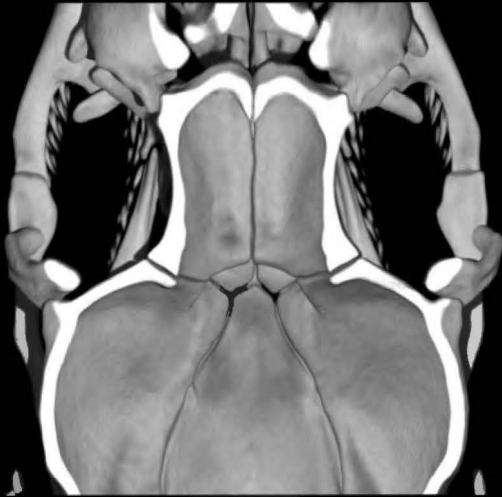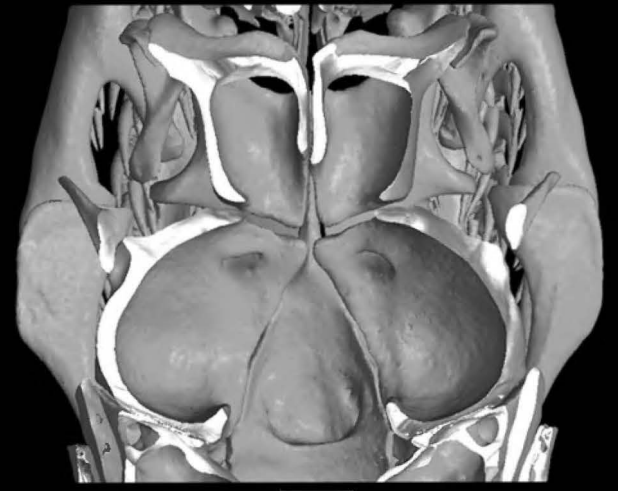

Oblique

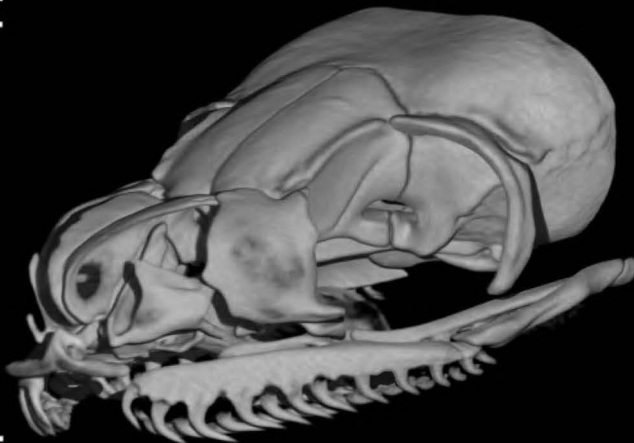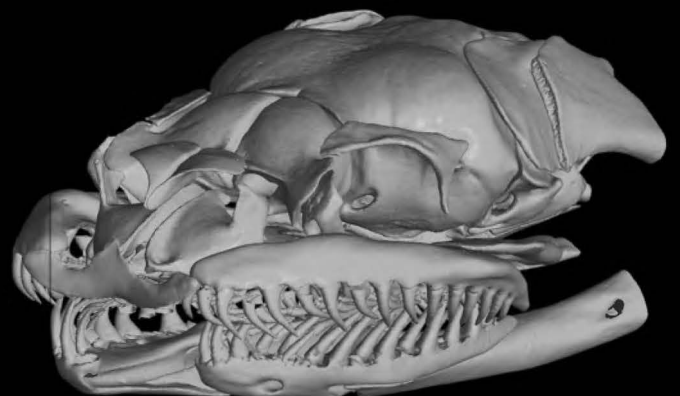

Fig. B

Xenodermidae

*Achalinus spinalis*

*Fimbrios klossi*

Lateral

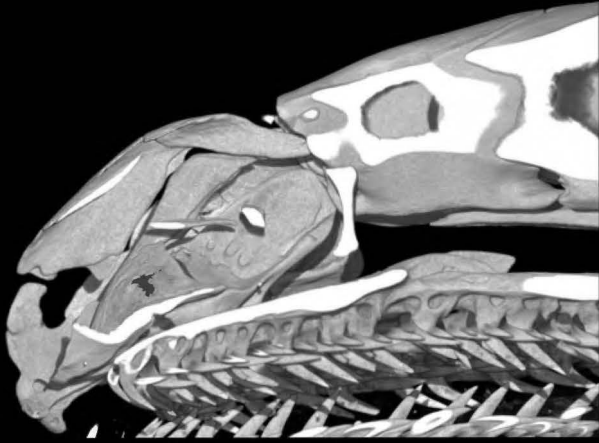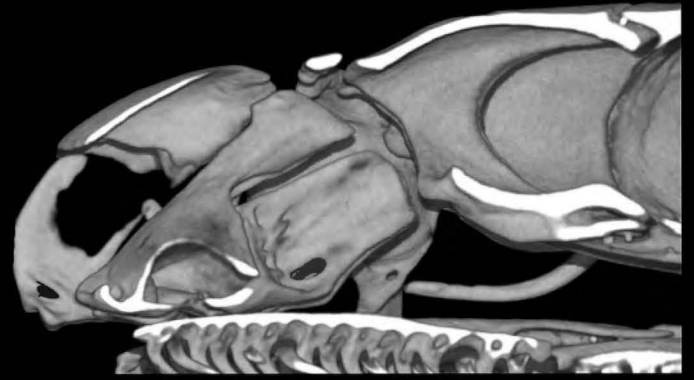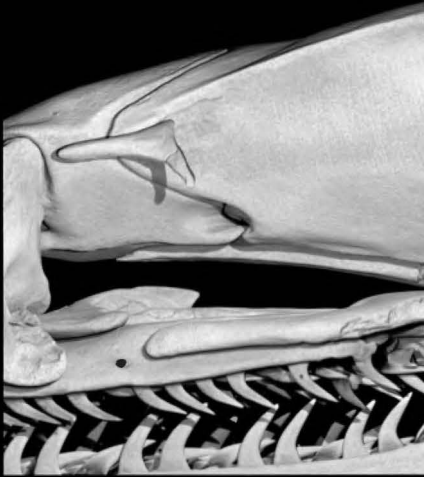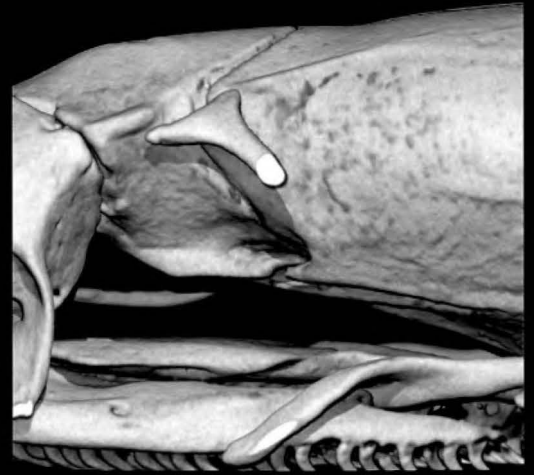

Dorsal

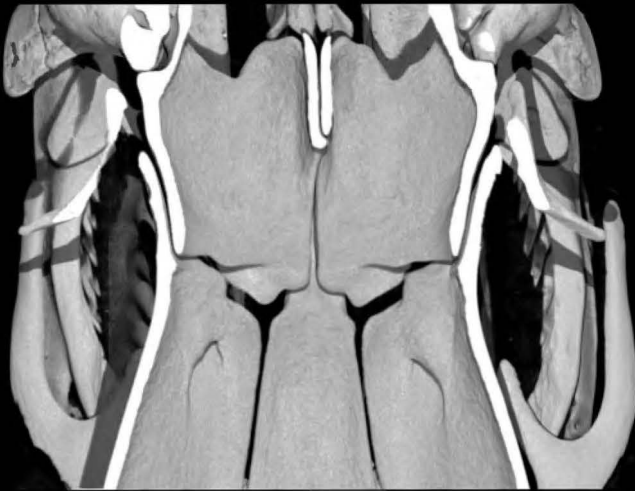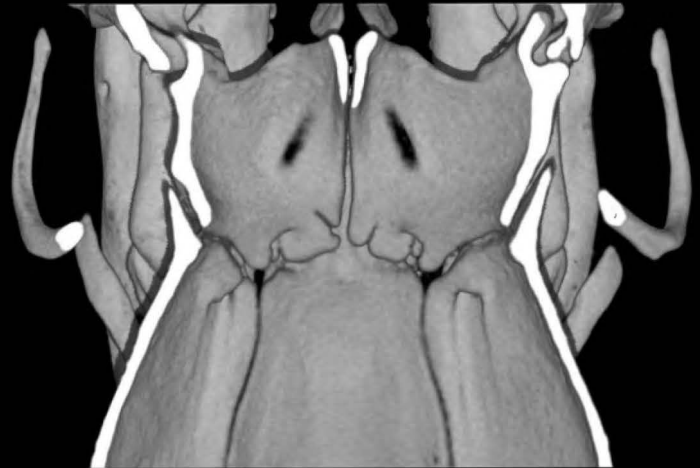

Oblique

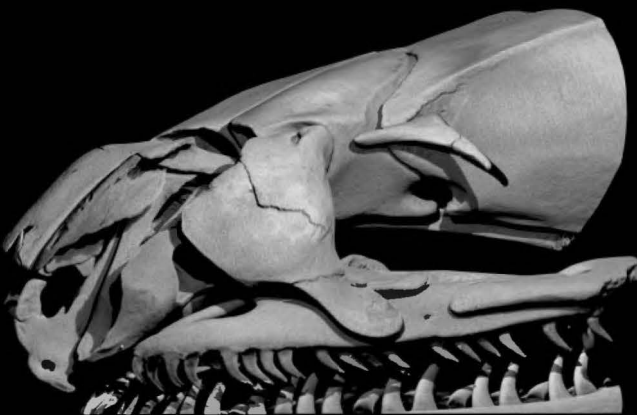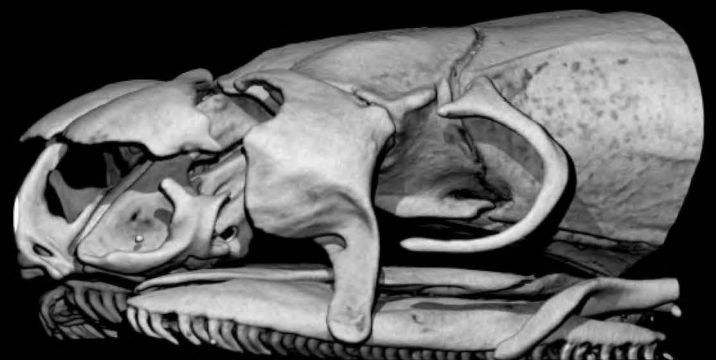

Fig. C

Xenodermidae

*Xenodermus javanicus*

Xylophiidae

*Xylophis perroteti*

Lateral

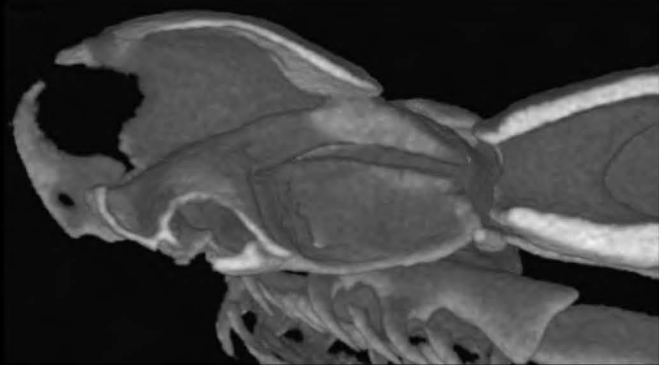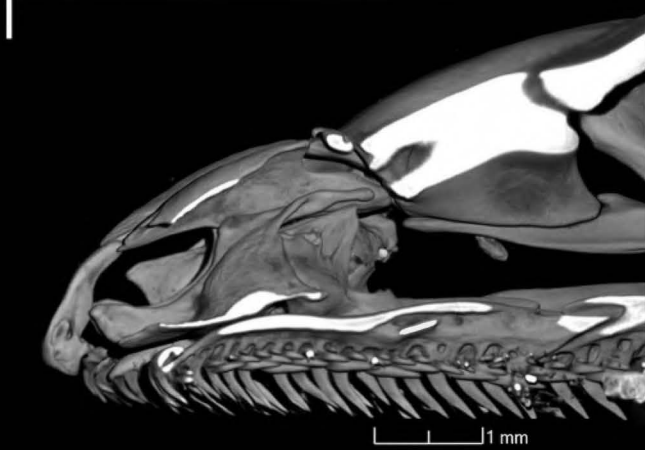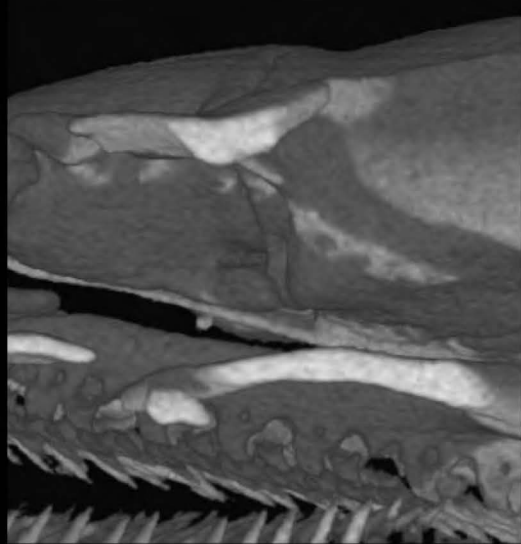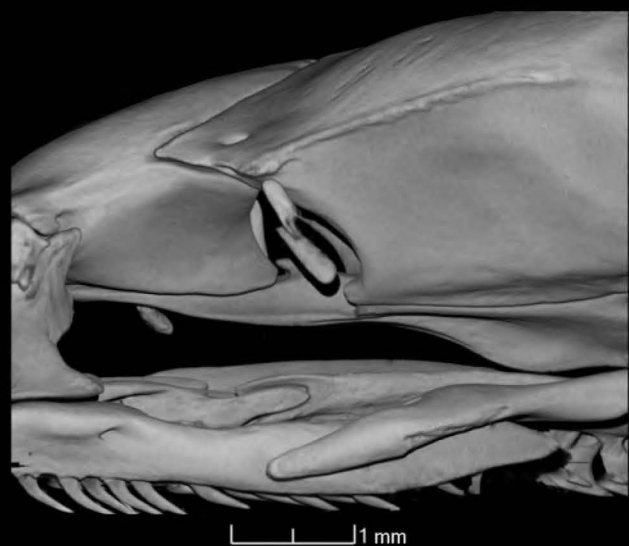

Dorsal

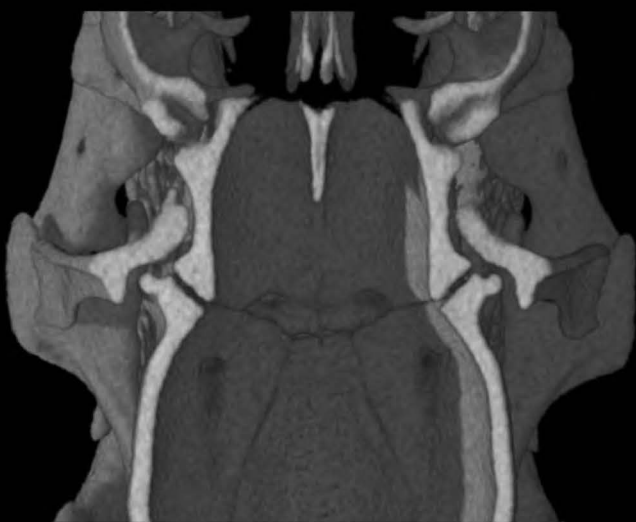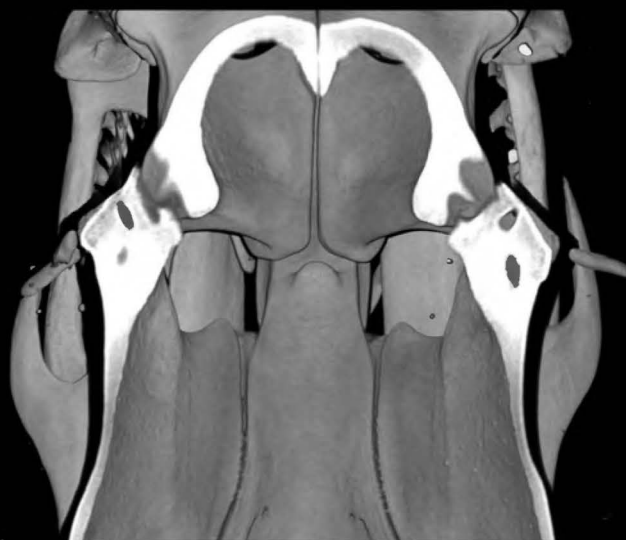

Oblique

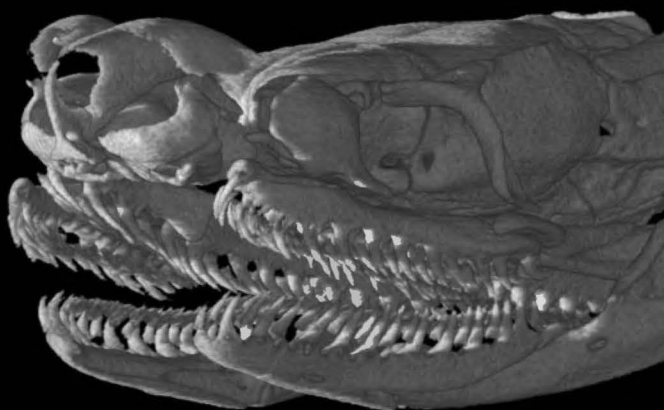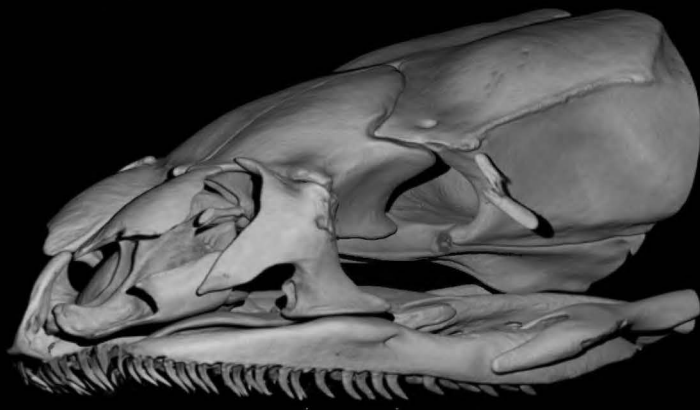



Fig. D

Pareidae

Lateral

Oblique

*Pareas moellendorffi*

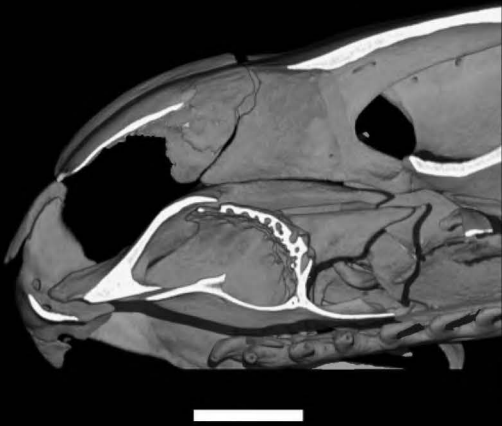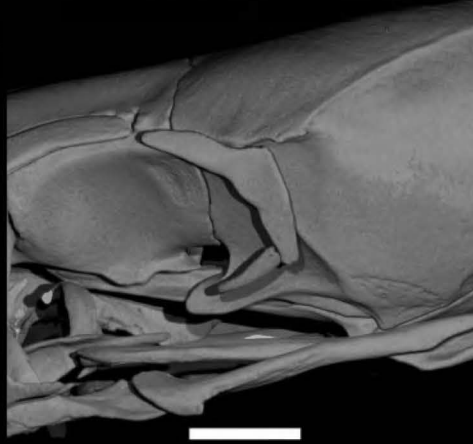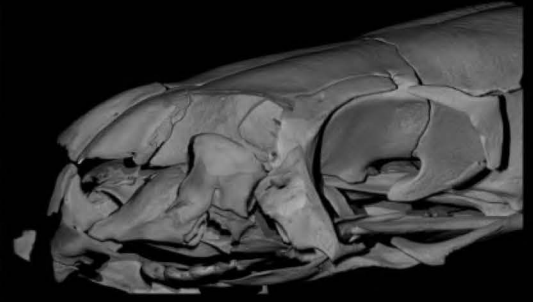

*Aplopeltura boa*

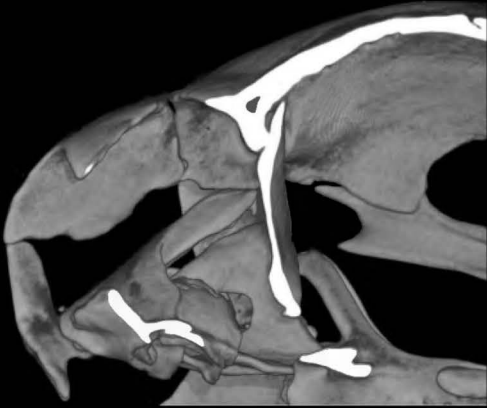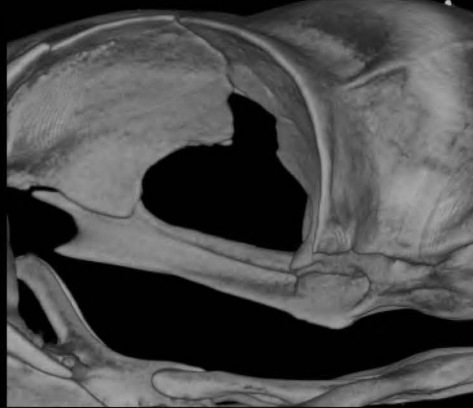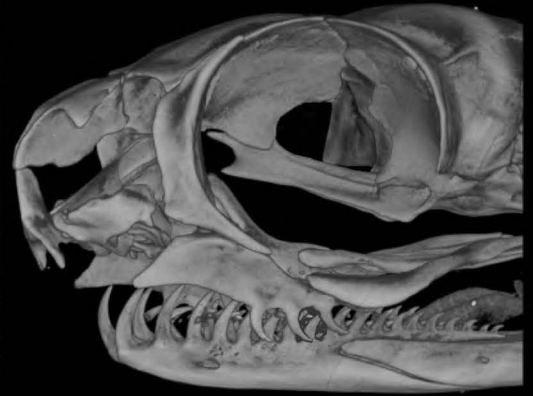

Fig. E

Viperidae

Lateral

Oblique

*Azemiops kharini*

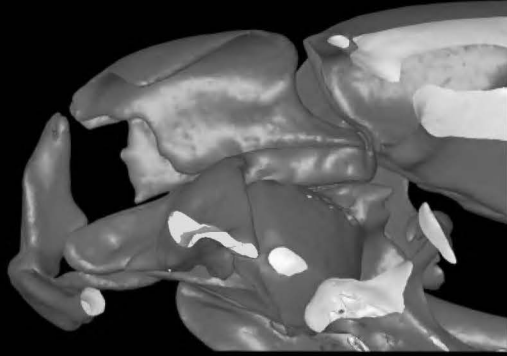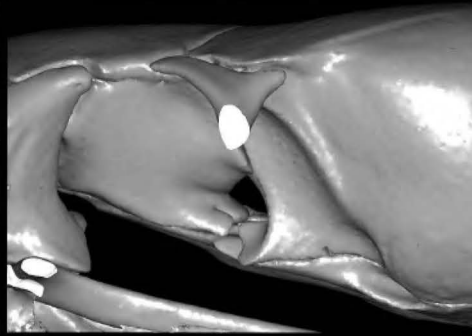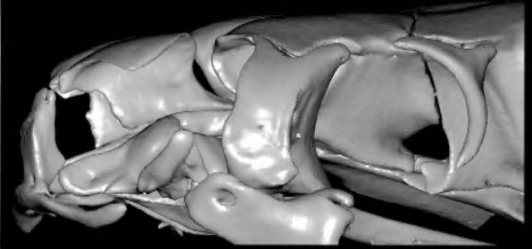

*Bothrops neuwiedi*

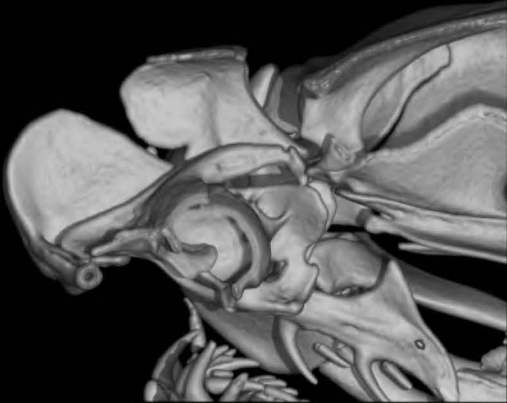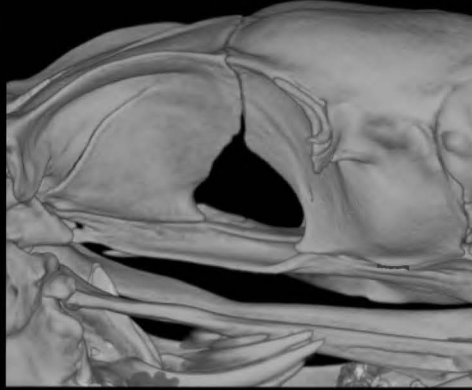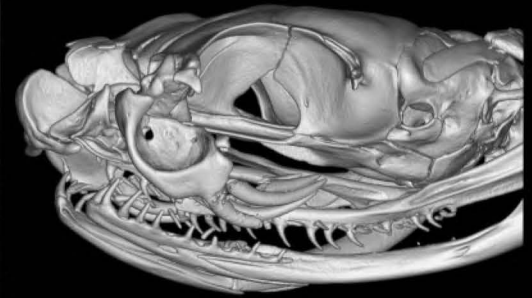

*Causus rhombeatus*

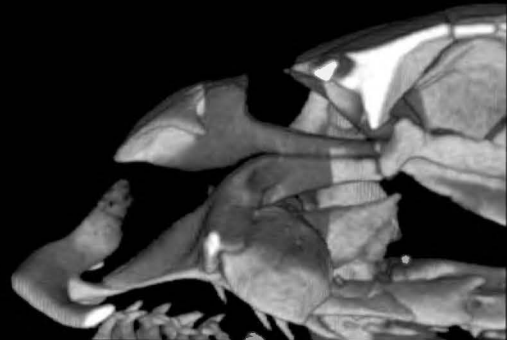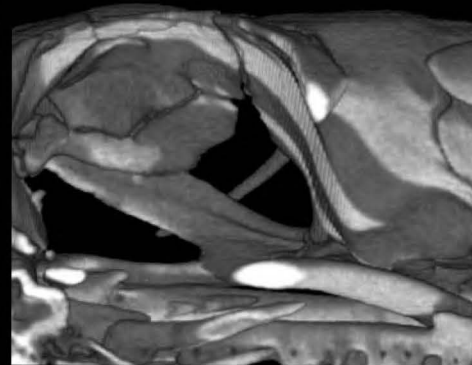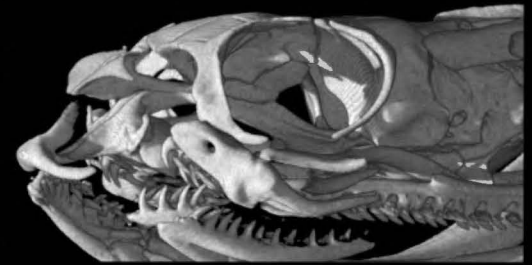

*Vipera ursinii*

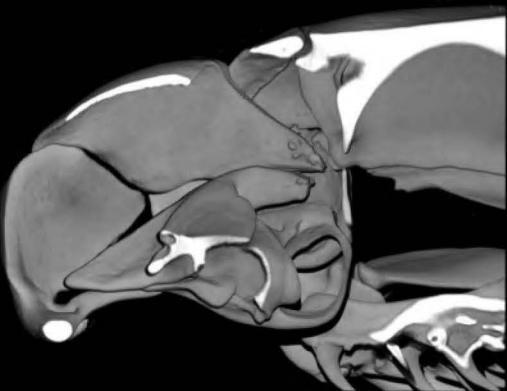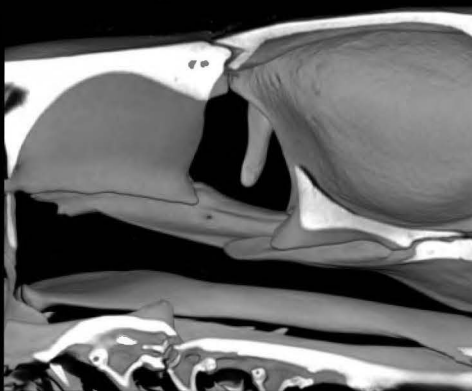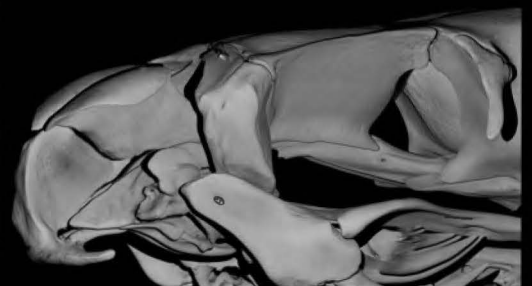

Fig. F

# Homalopsidae

Lateral

Oblique

*Bitia hydroides*

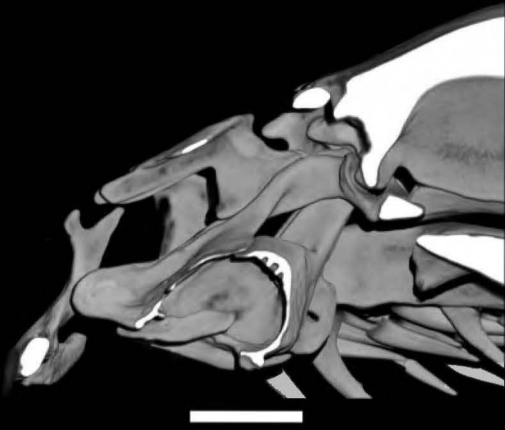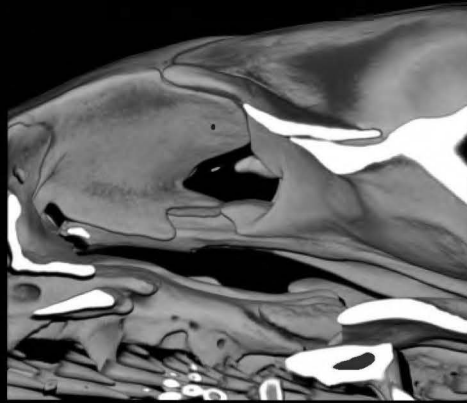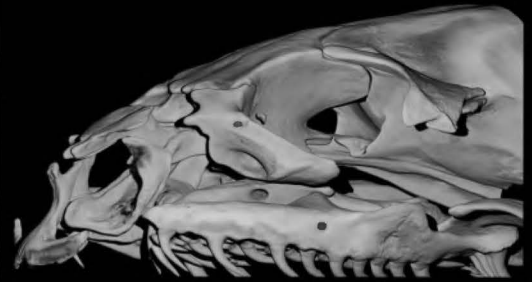

*Brachyorrhos albus*

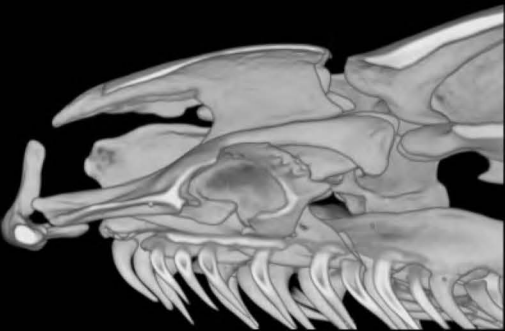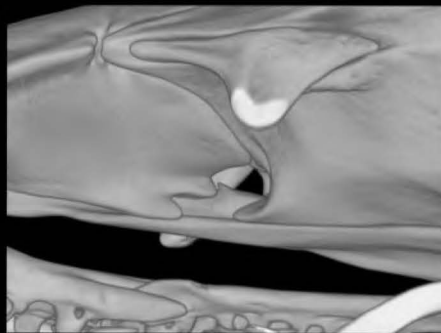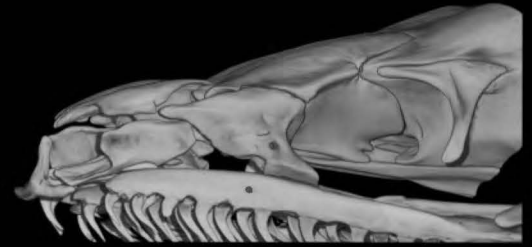

*Enhydris chinensis*

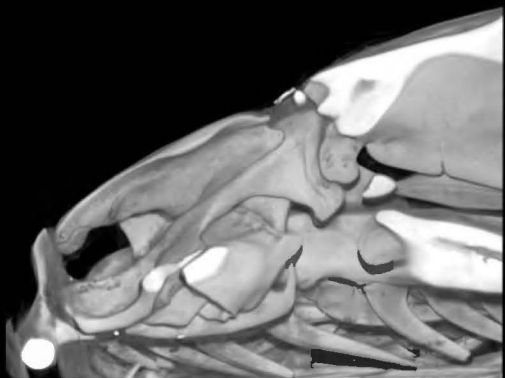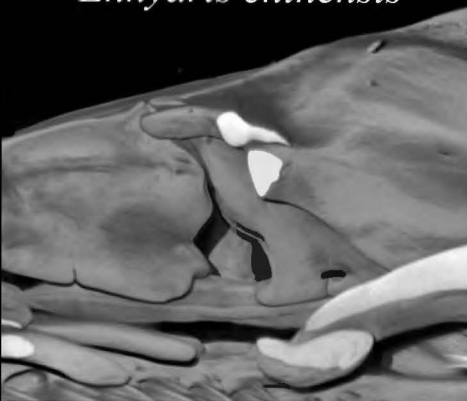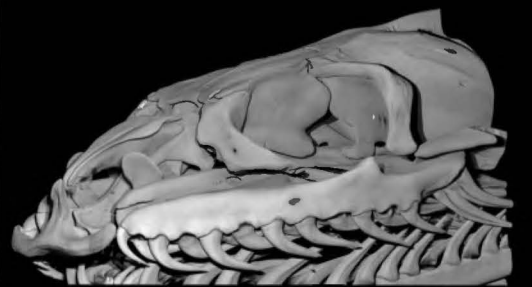

*Fordonia leucobalia*

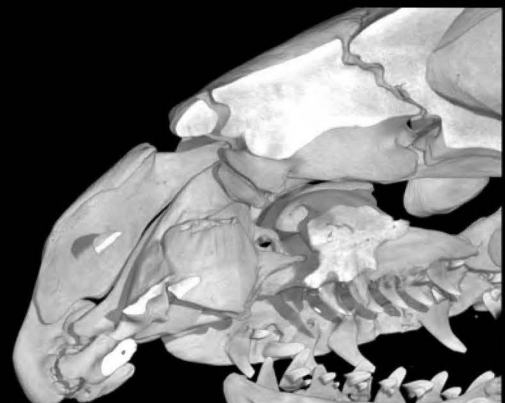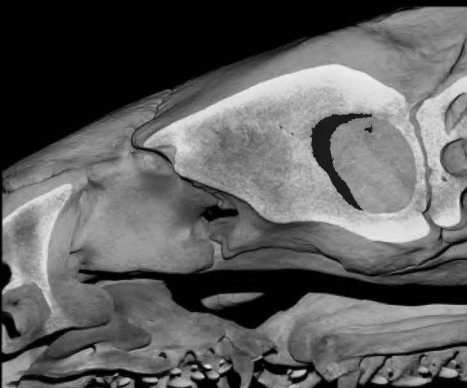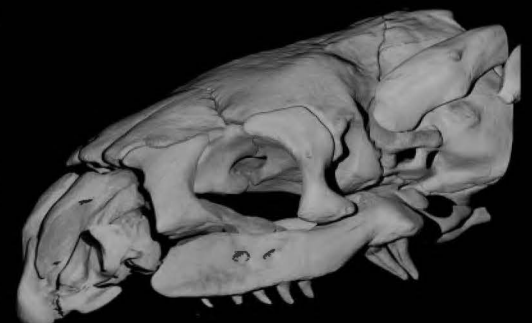

Fig. G

Homalopsidae

Lateral

Oblique

*Homalopsis buccata*

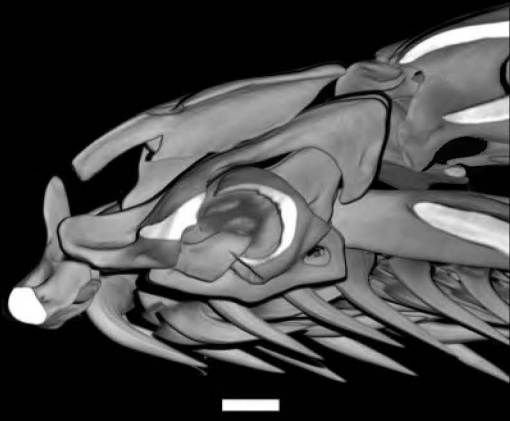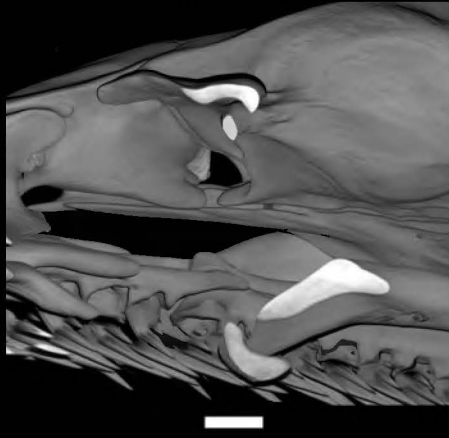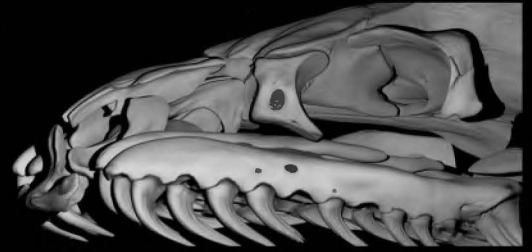

Psammophiidae

Lateral

Oblique

*Malpolon monspessulanus*

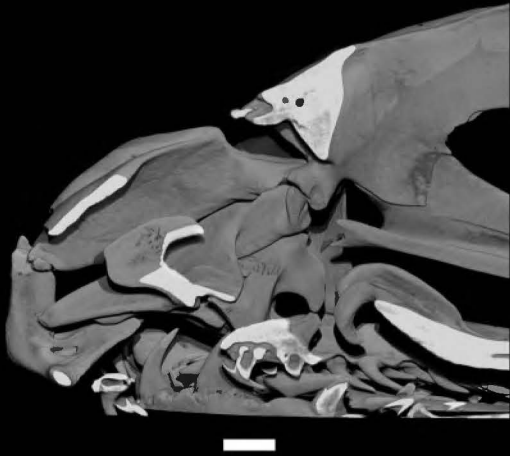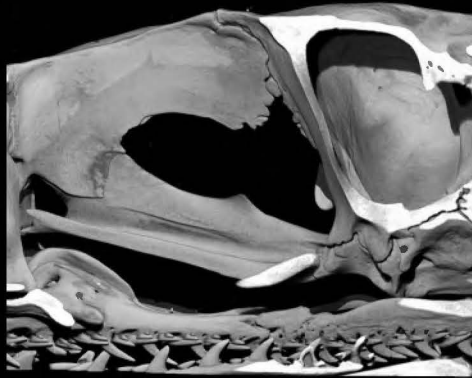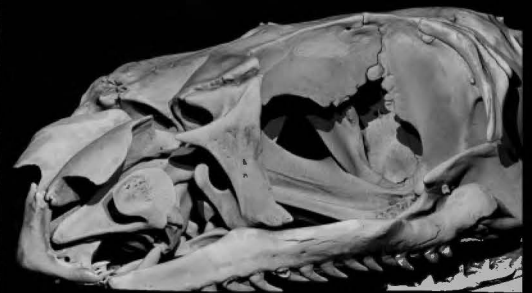

*Mimophis mahfalensis*

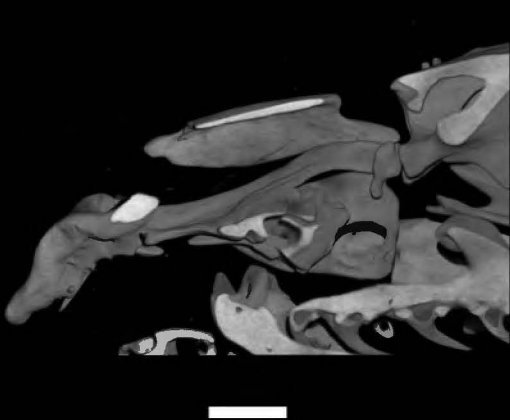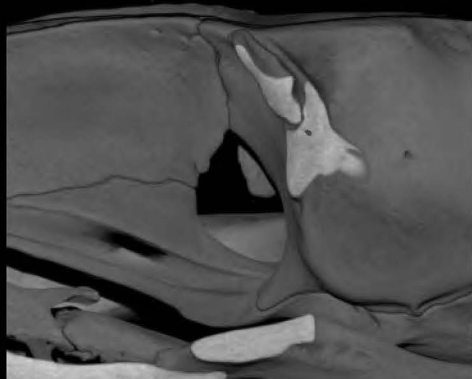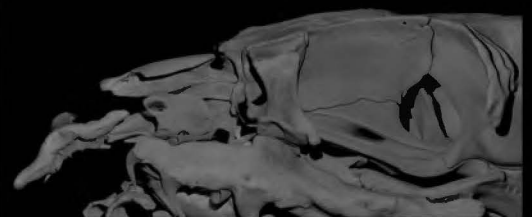

Fig. H

Psammophiidae

Lateral

Oblique

*Psammophylax variabilis*

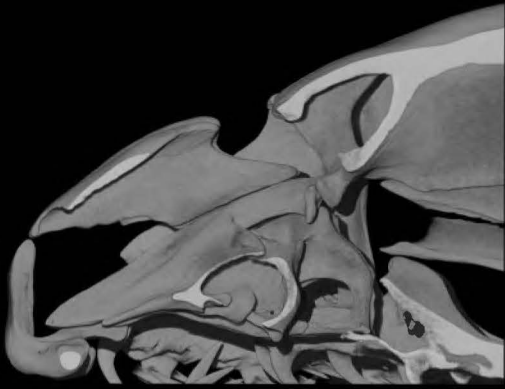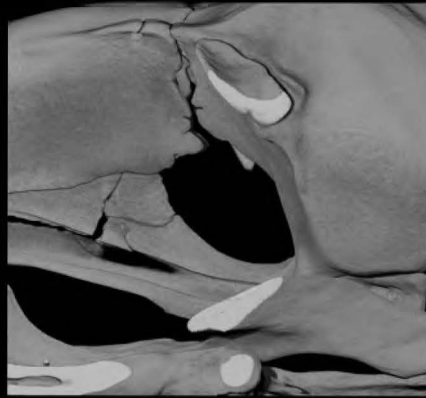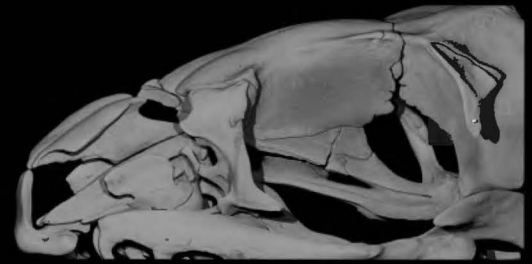

*Rhamphiophis oxyrhynchus*

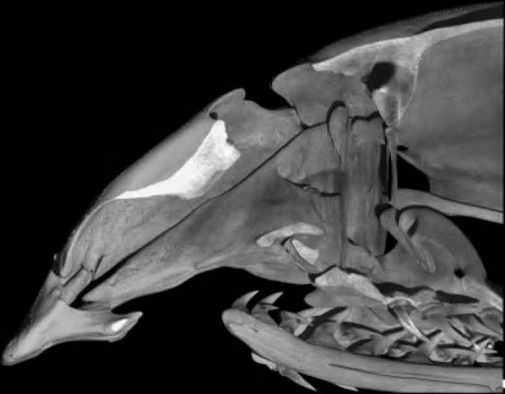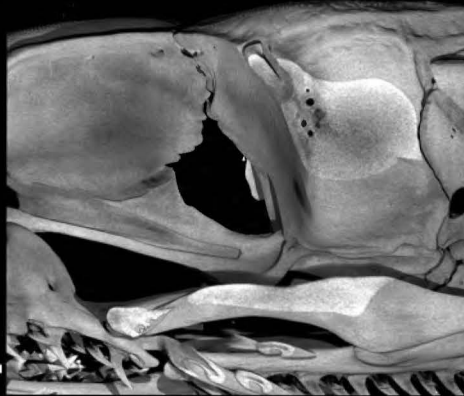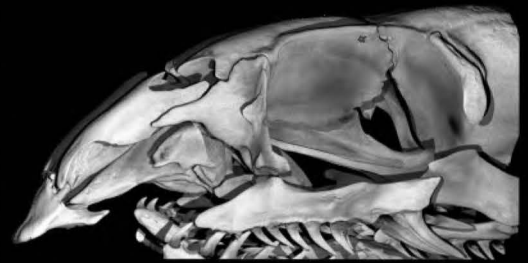

*Psammophis phillipsi*

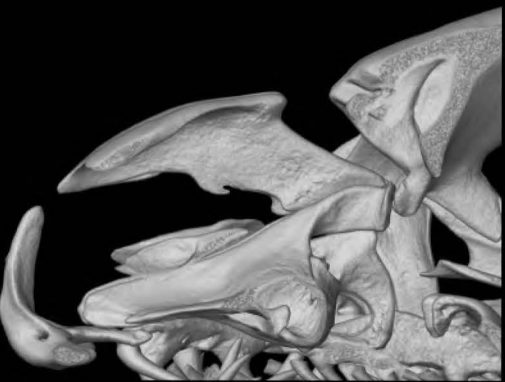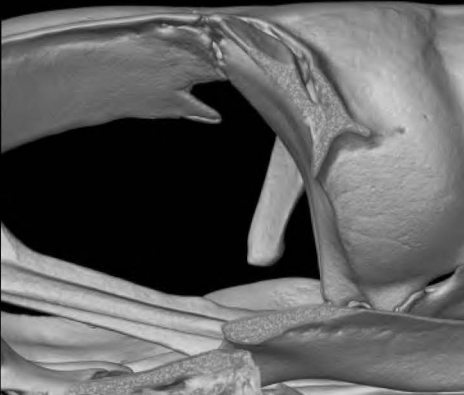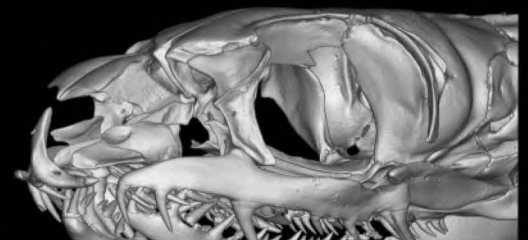



Fig. 1

Cyclocoridae

Lateral

Oblique

*Cyclocorus lineatus*

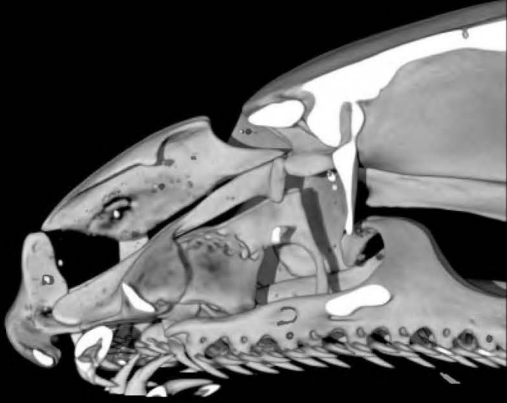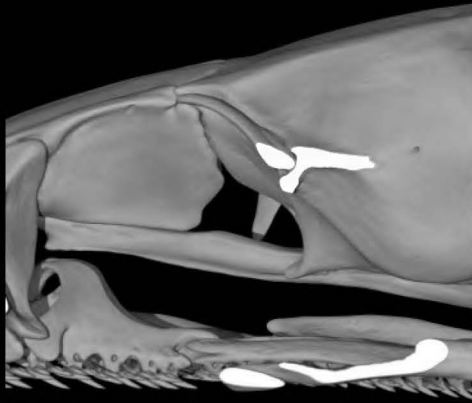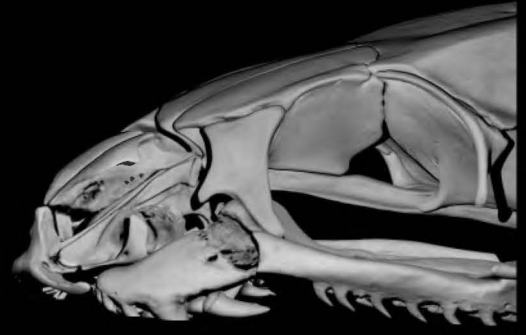

*Oxyrhabdium modestus*

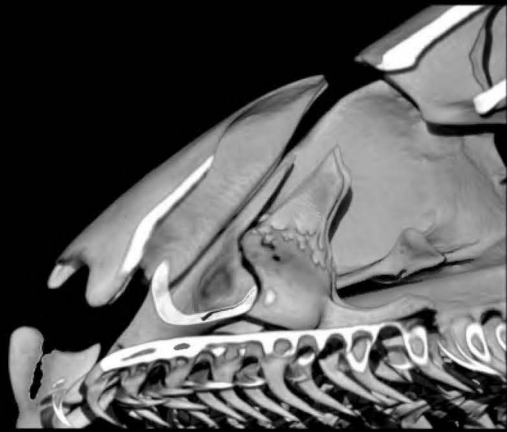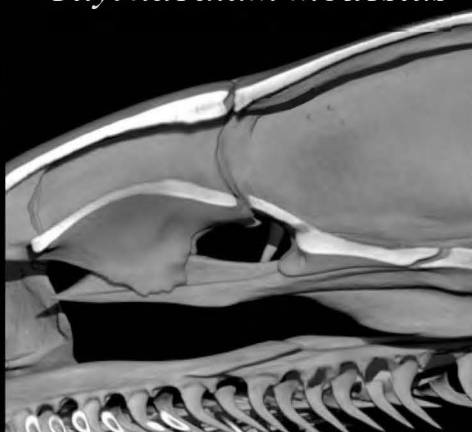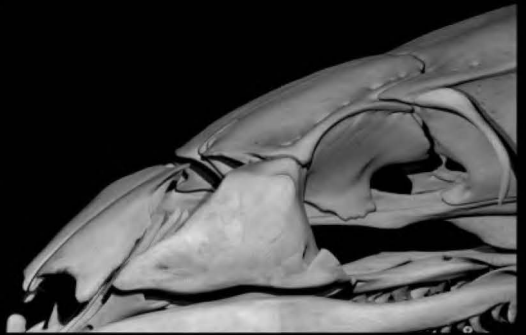

Atractaspididae

Lateral

Oblique

*Aparallactus modestus*

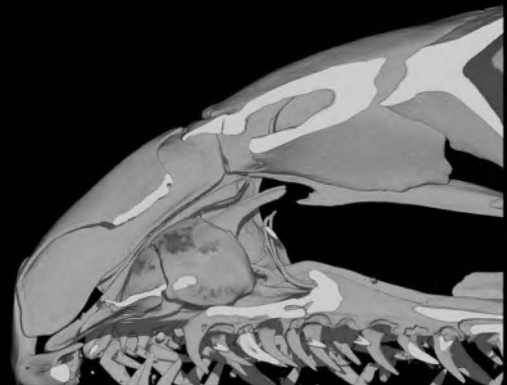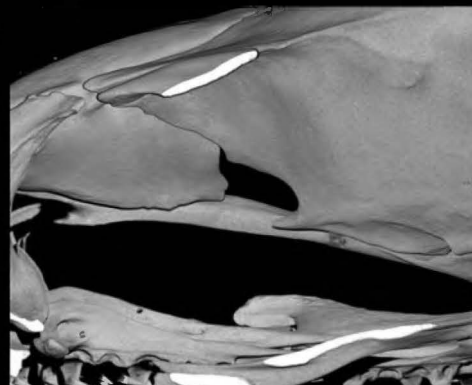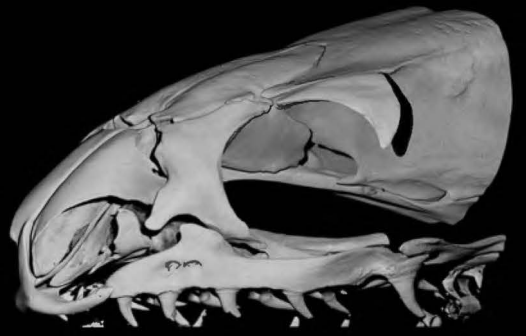



Fig. J

Atractaspididae

Lateral

Oblique

*Atractaspis bibronii*

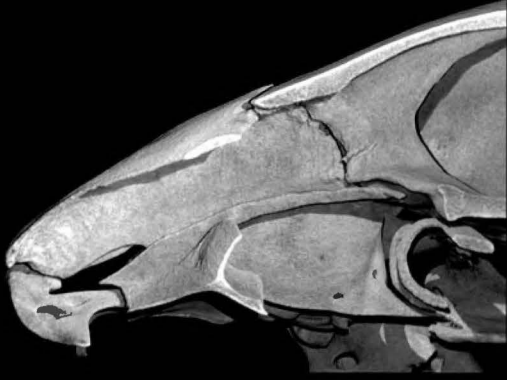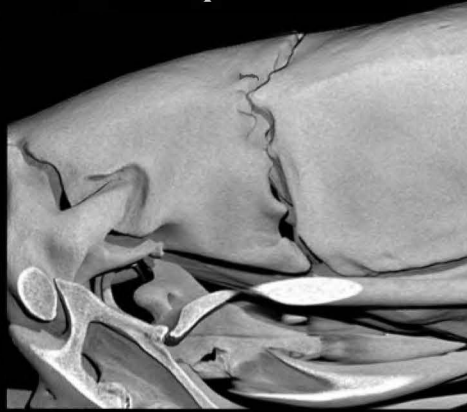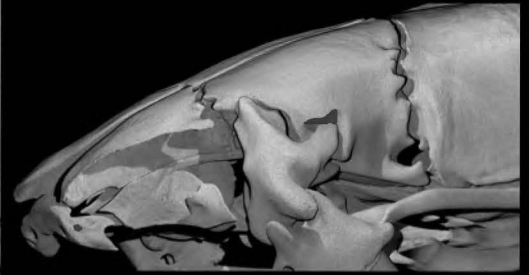

*Homoroselaps lacteus*

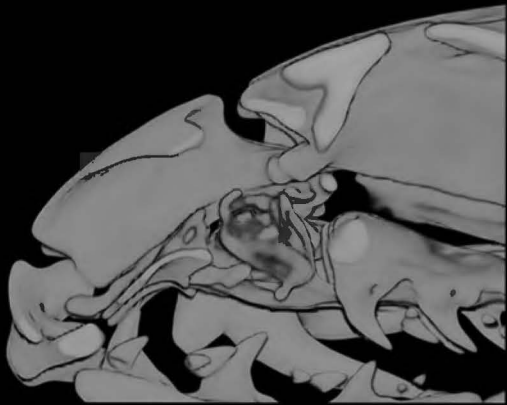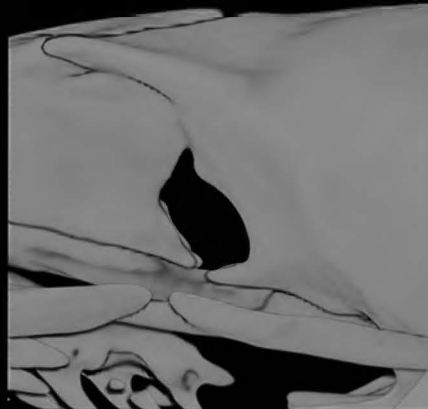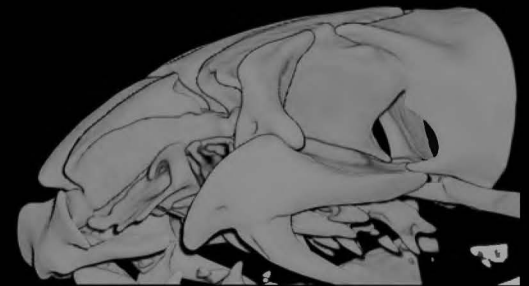

*Macrelaps microlepidotus*

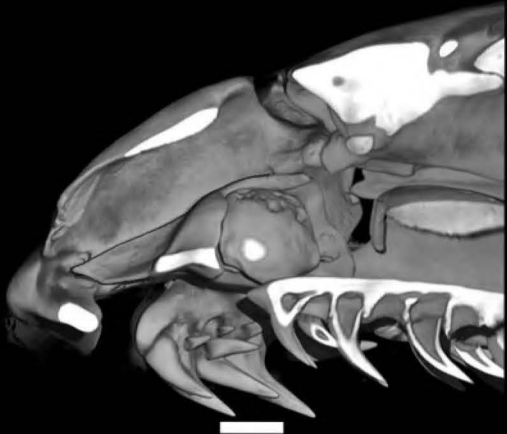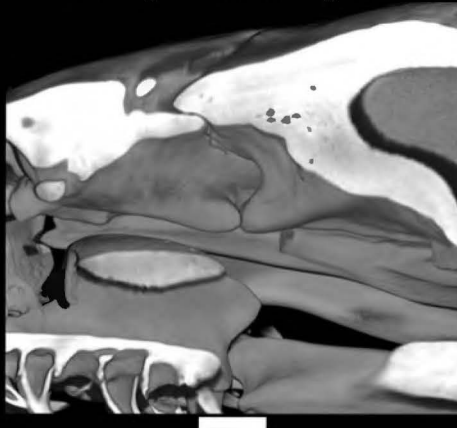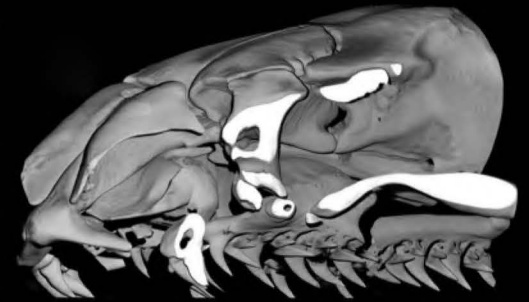

*Polemon christyi*

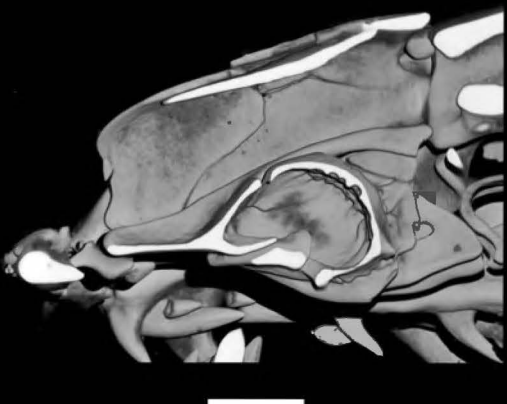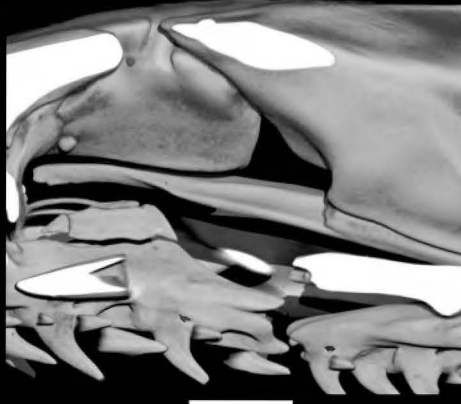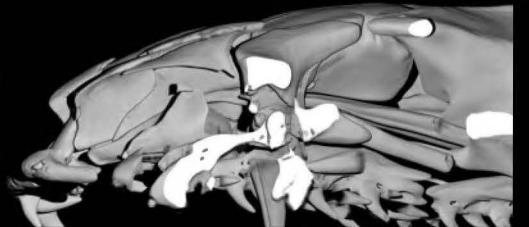

Fig. K

Lamprophiidae

Lateral

Oblique

*Bothrolycus ater*

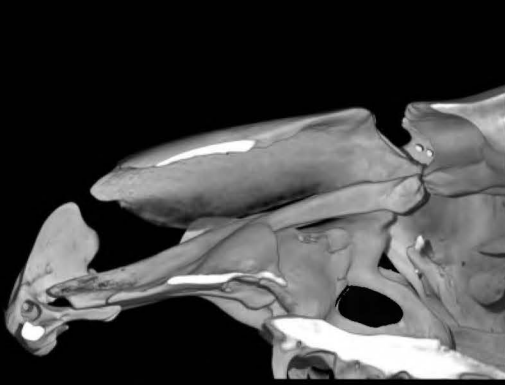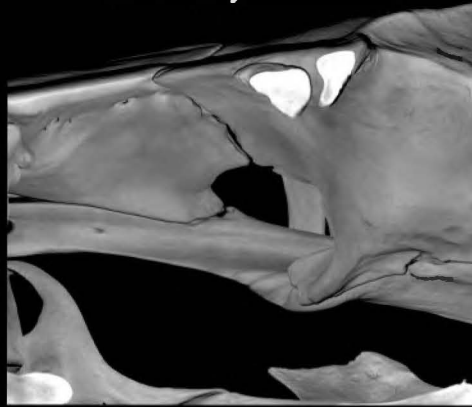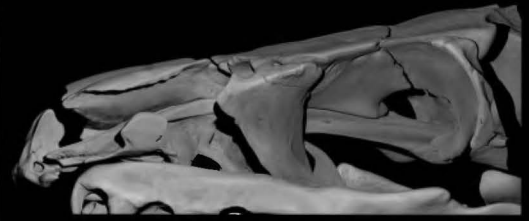

*Chamaelycus fasciatus*

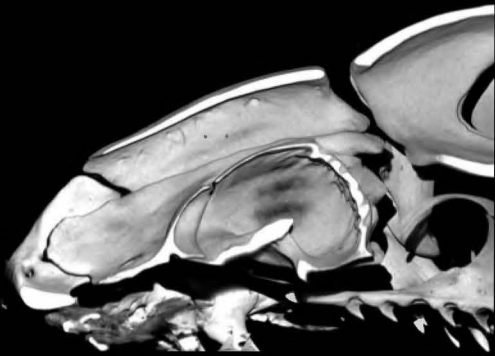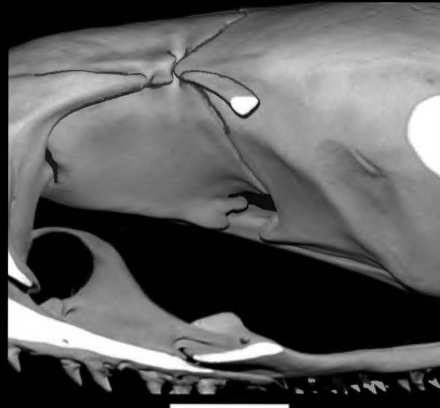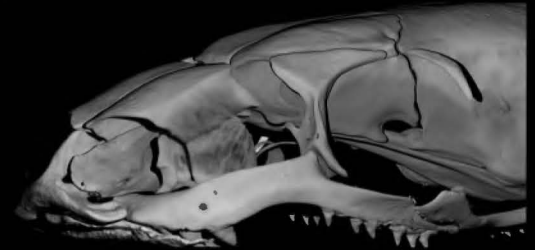

*Dipsadoboa weileri*

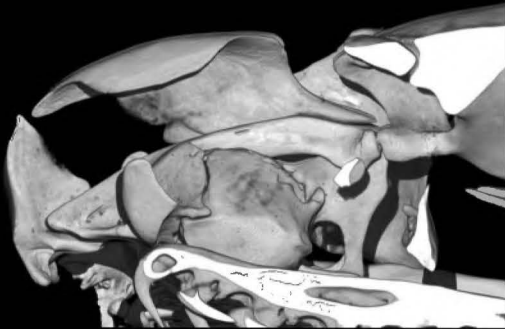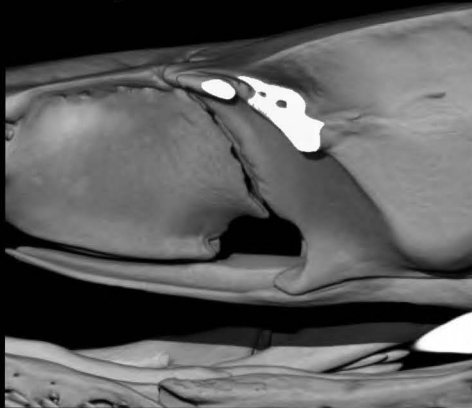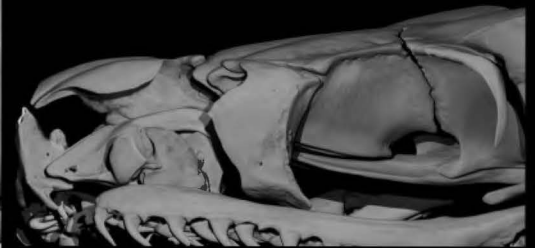

*Lamprophis olivaceus*

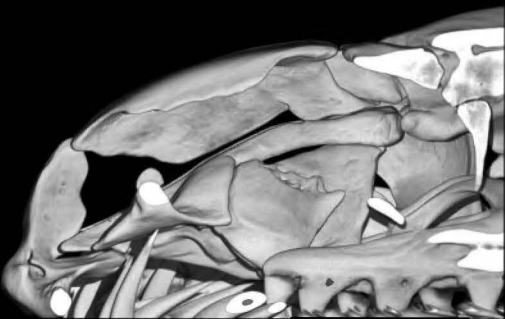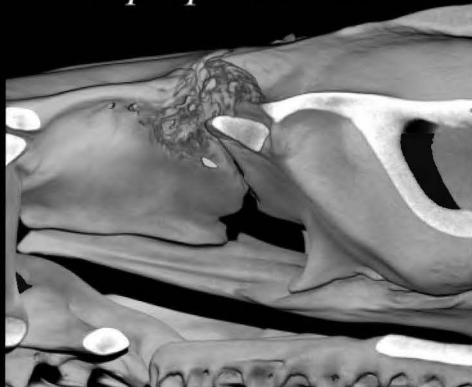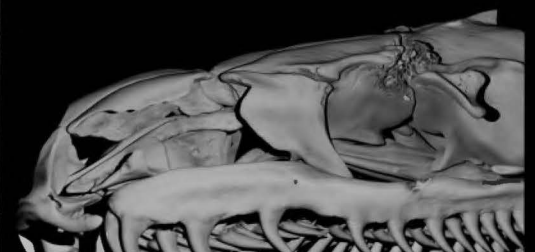

Fig. L

Lamprophiidae

Lateral

Oblique

*Lycodonomorphus rufulus*

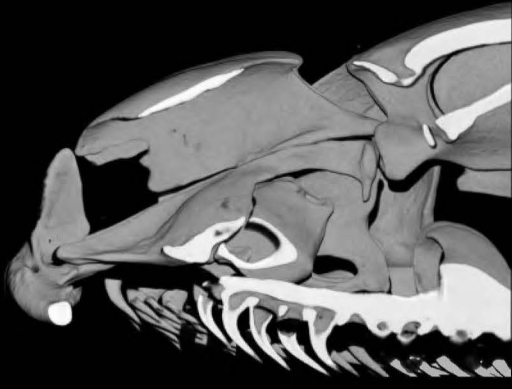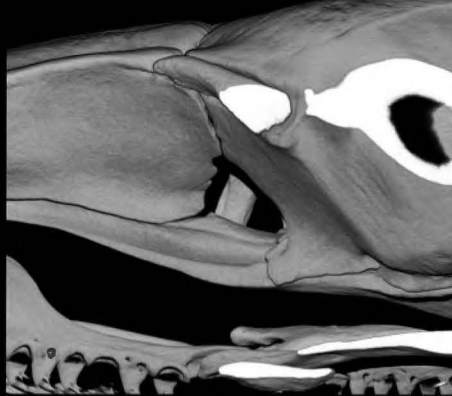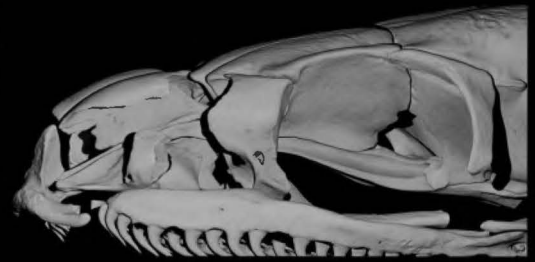

*Lycophidion capense*

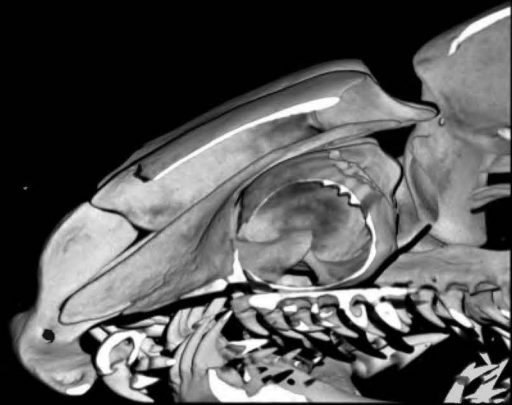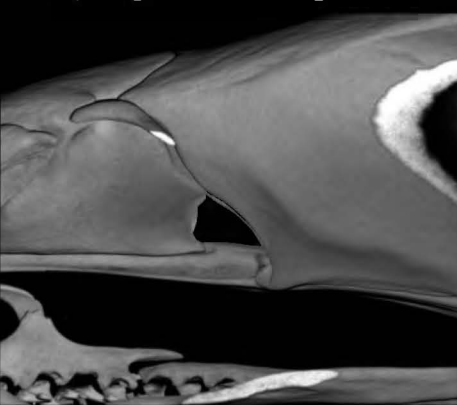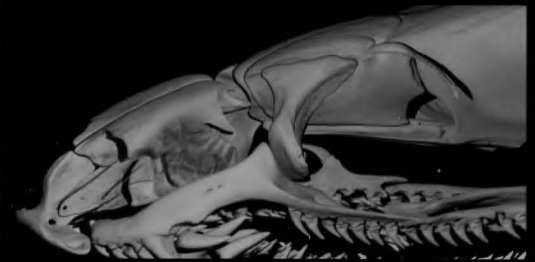

*Gonionotophis capensis*

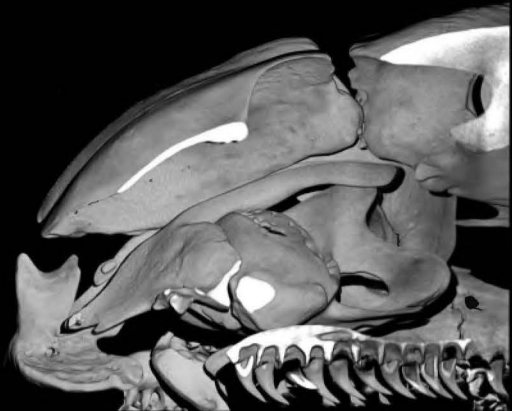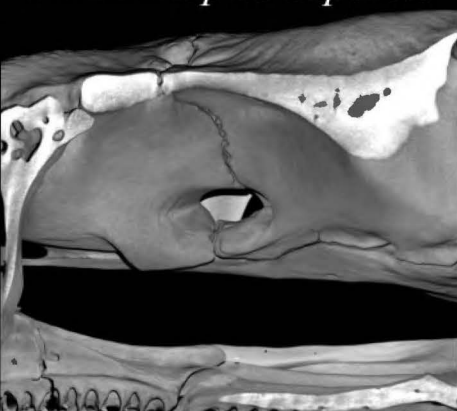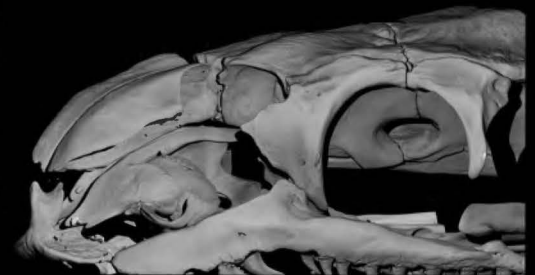

*Pseudoboodon lemniscatus*

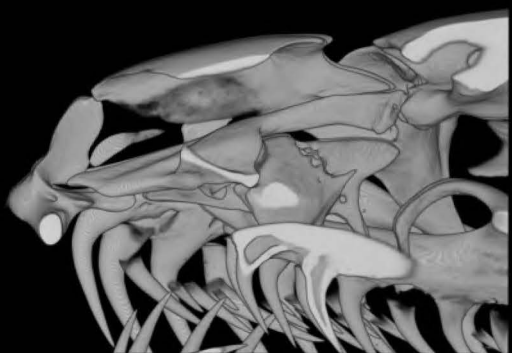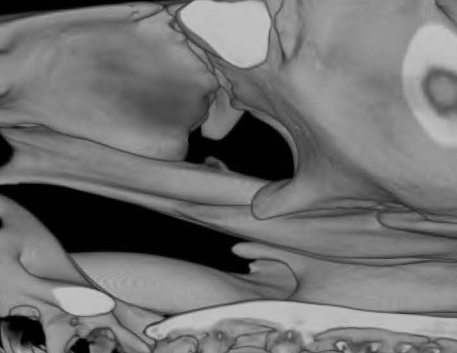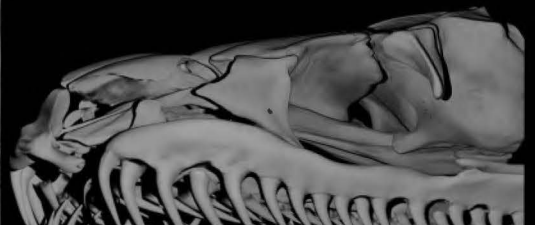

Fig. M

Pseudoxyrhopiidae

Lateral

Oblique

*Alluaudina bellyi*

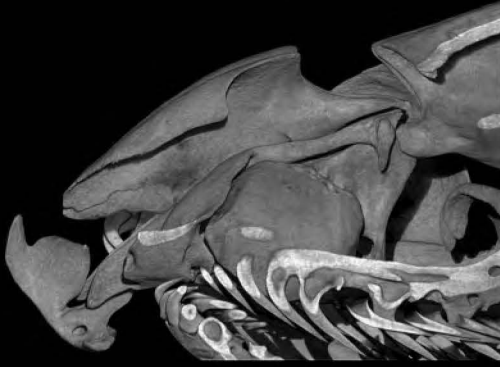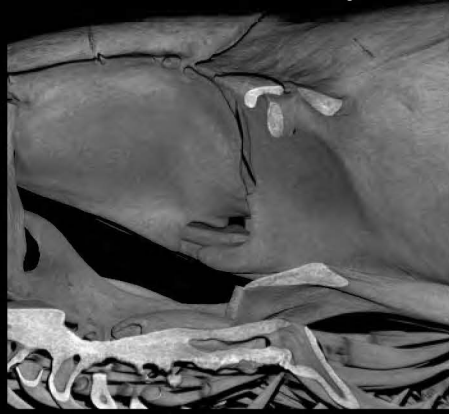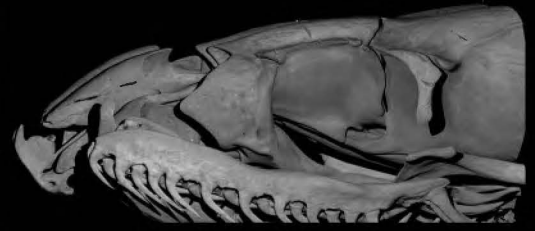

*Dromicodryas quadrilineatus*

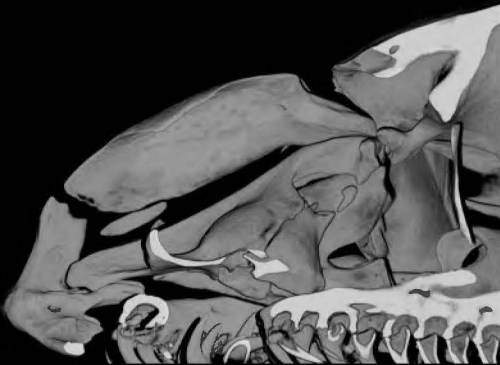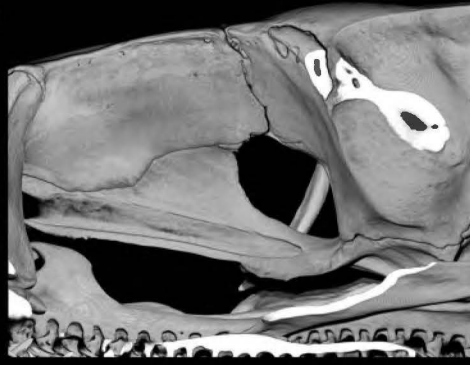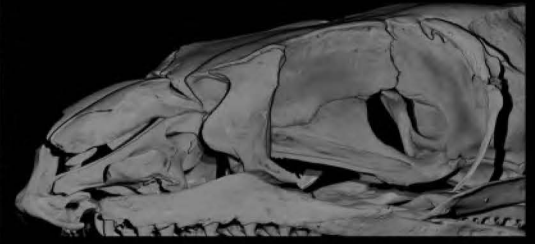

*Duberria lutrix*

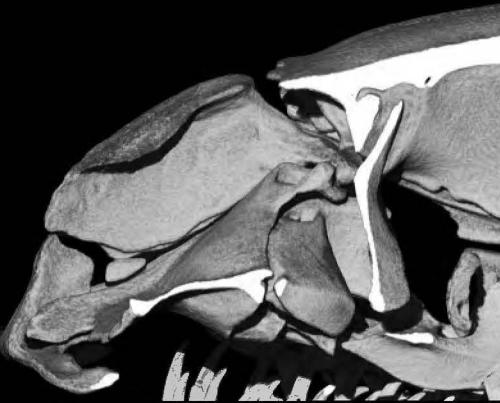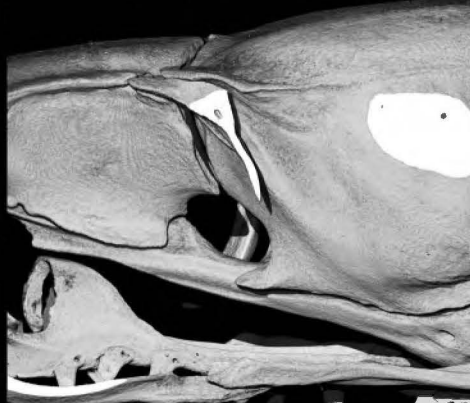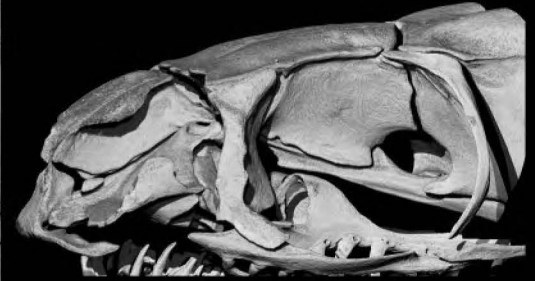

*Heteroliodon occipitalis*

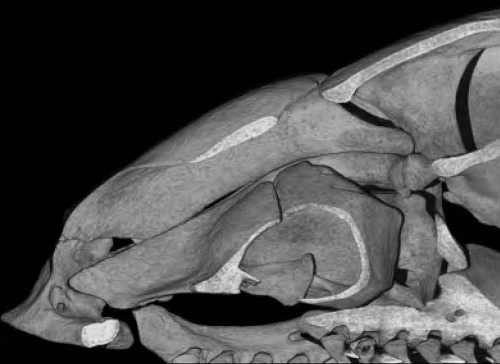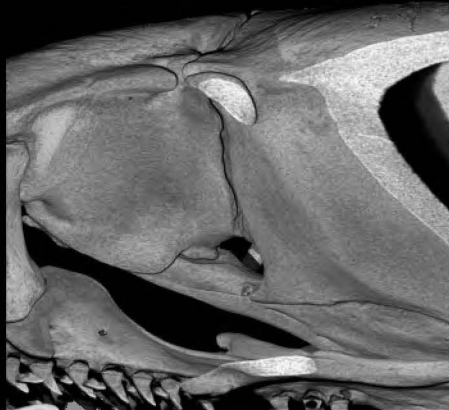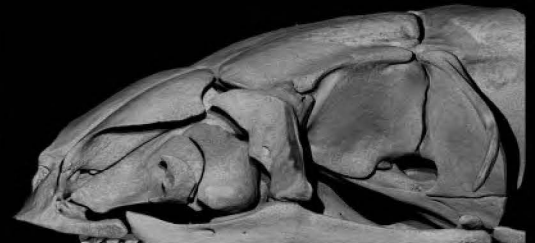



Pseudoxyrhopiidae

Lateral

Oblique

*Ithycyphus miniatus*

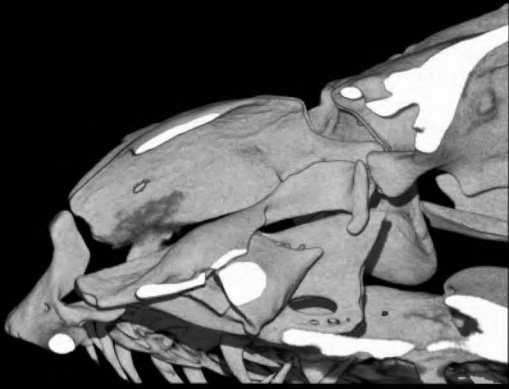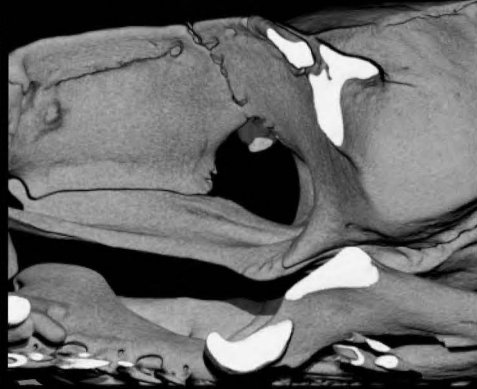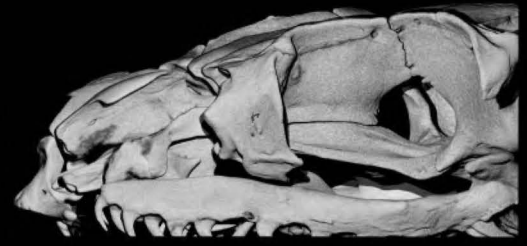

*Langaha madagascariensis*

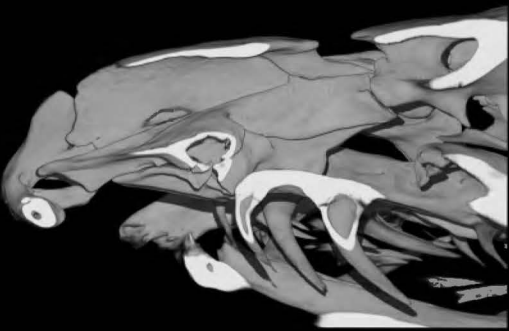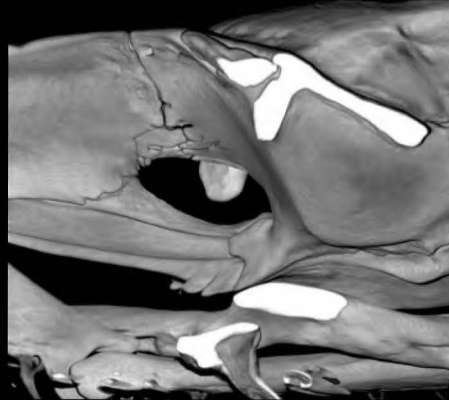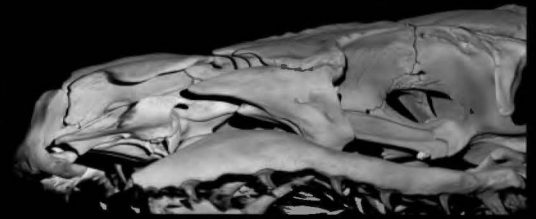

*Liophidium torquatum*

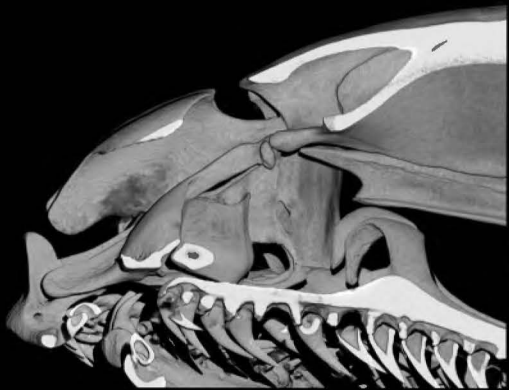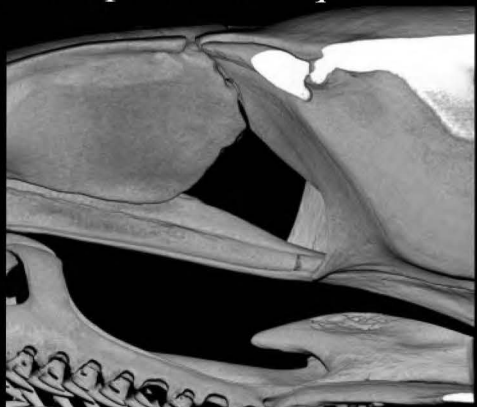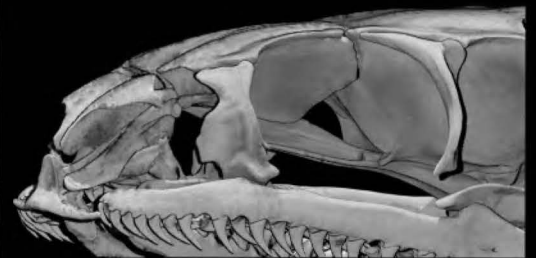

*Pseudoxyrhopus tritaeniatus*

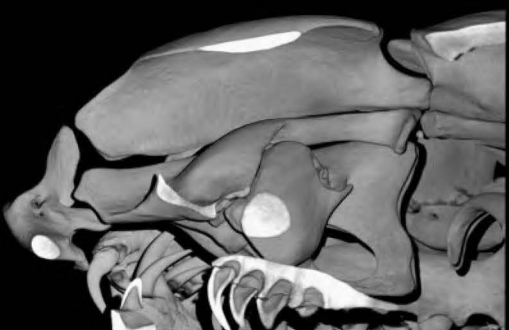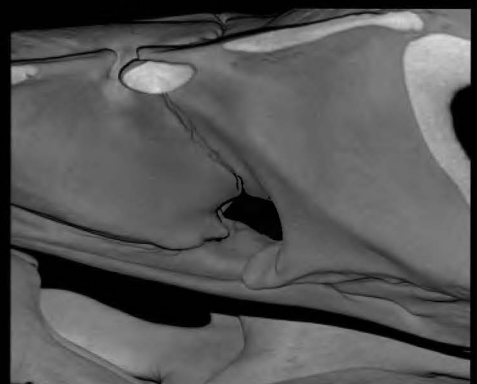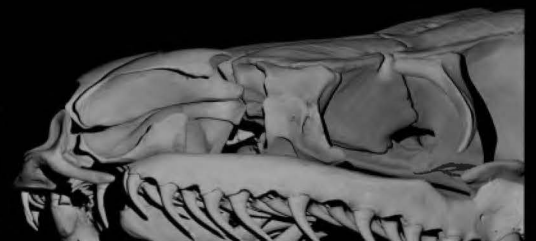

Fig. 0

Elapidae

Lateral

Oblique

*Bungarus caeruleus*

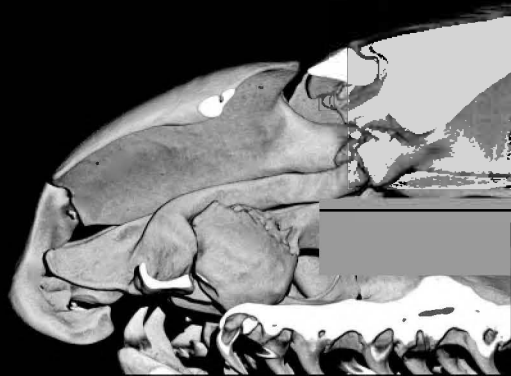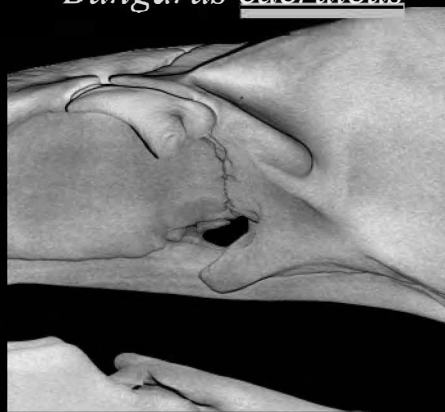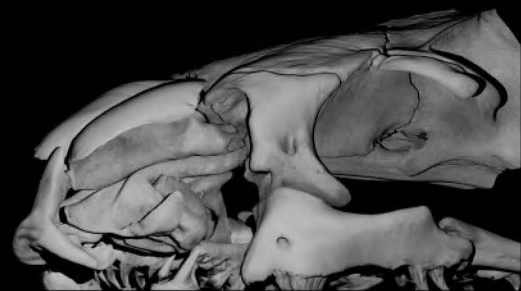

*Calliophis intestinalis*

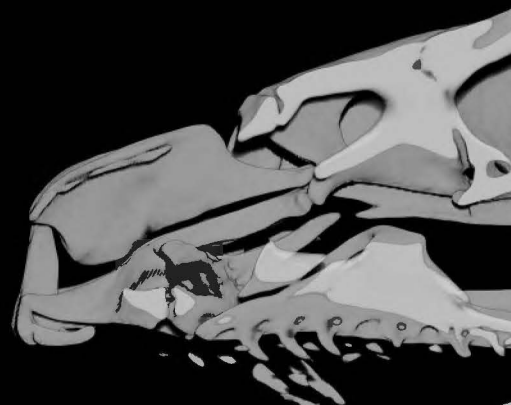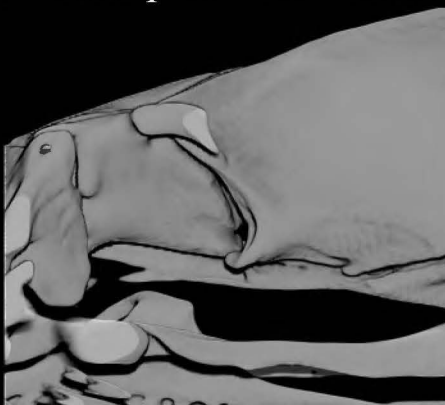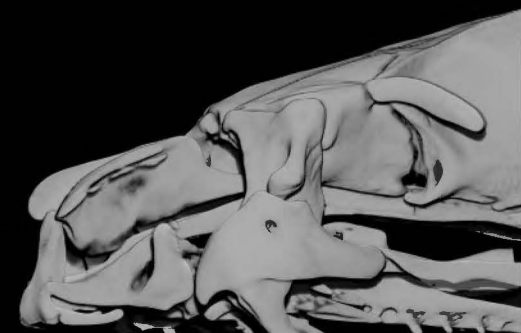

*Micrurus narduccii*

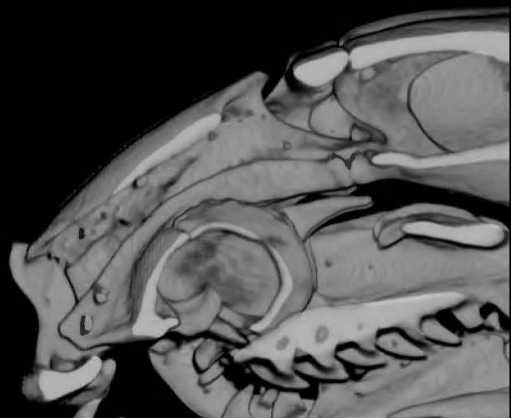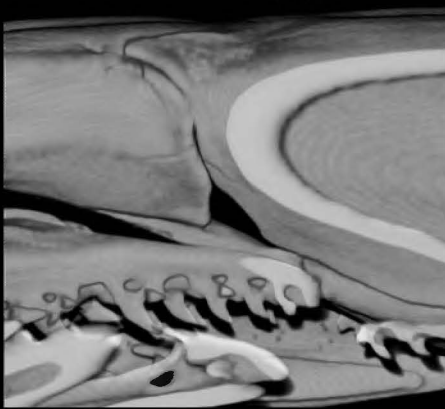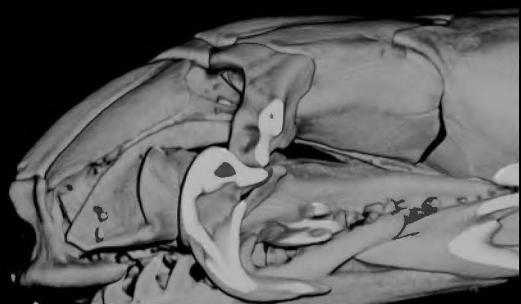

*Naja naja*

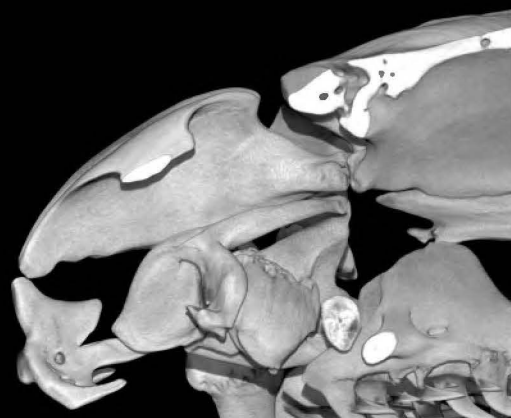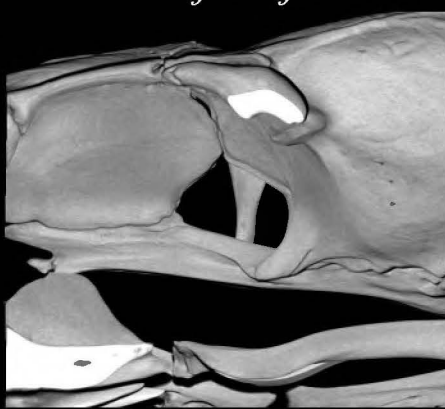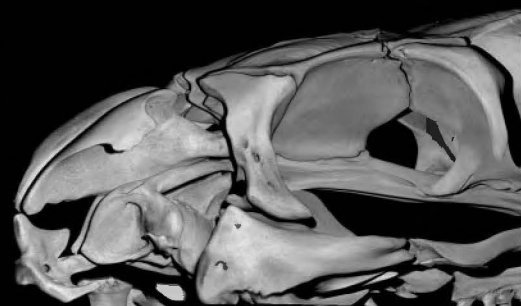



Fig. P

Elapidae

Lateral

Oblique

*Notechis scutatus*

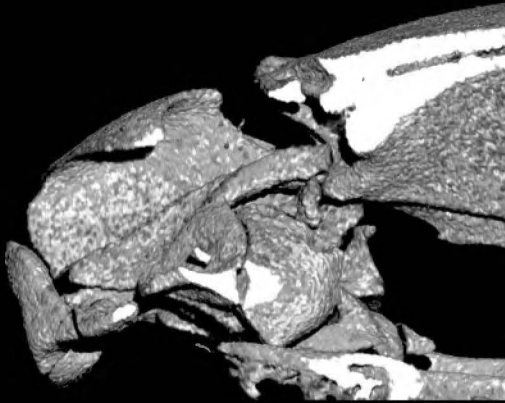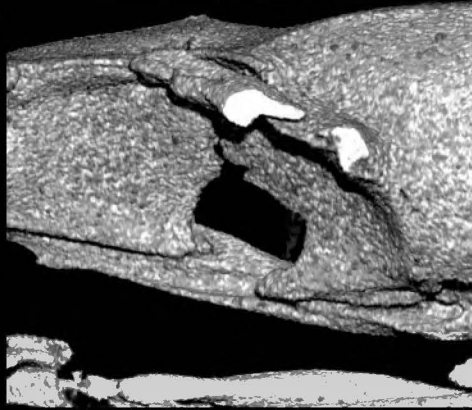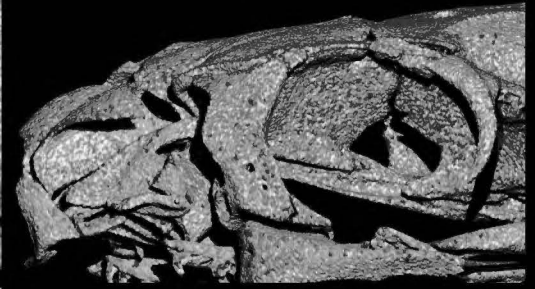

*Toxicocalamus loriae*

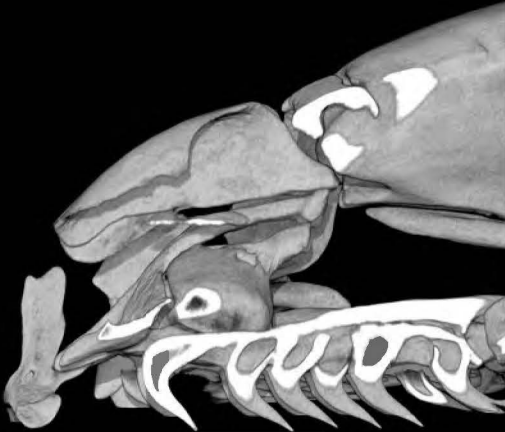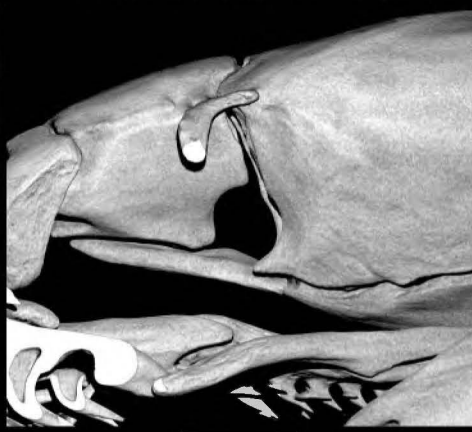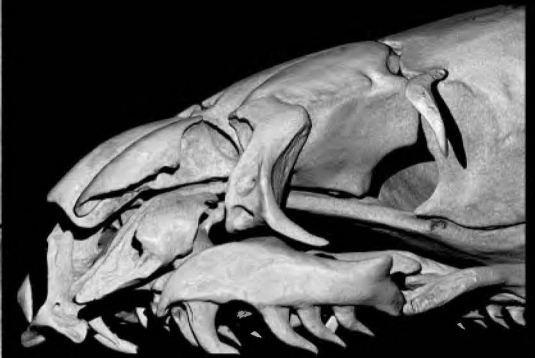

Pseudoxenodontidae

Lateral

Oblique

*Pseudoxenodon stricticaudatus*

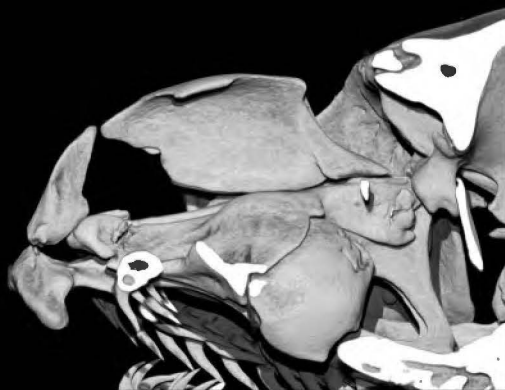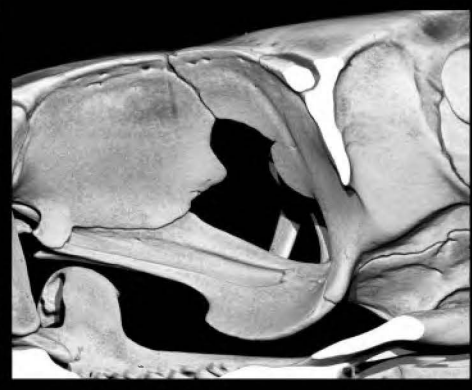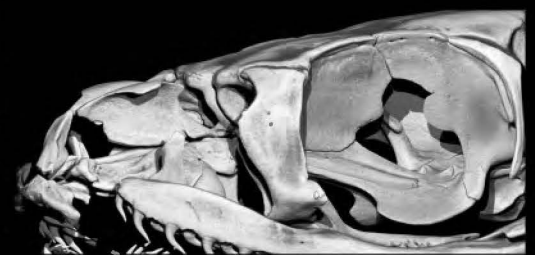

Fig. Q

Natricidae

Lateral

Oblique

*Afronatrix anoscopa*

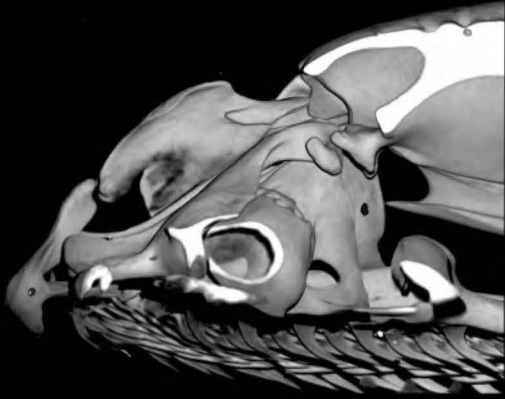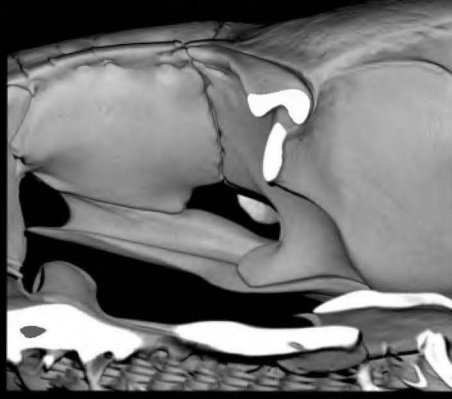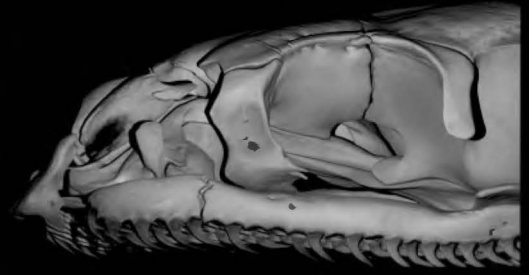

*Aspidura trachyprocta*

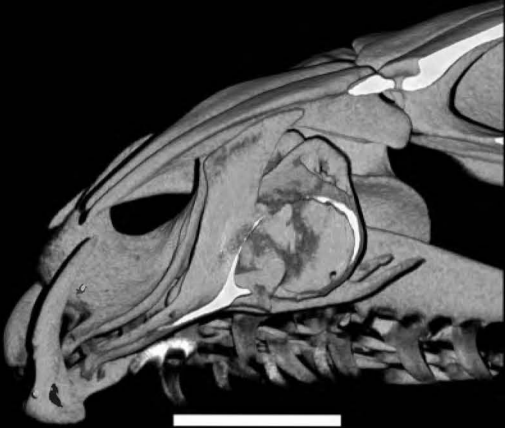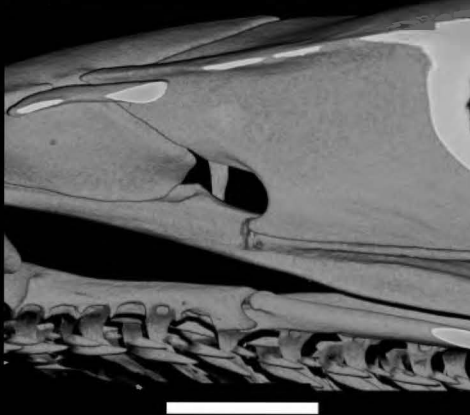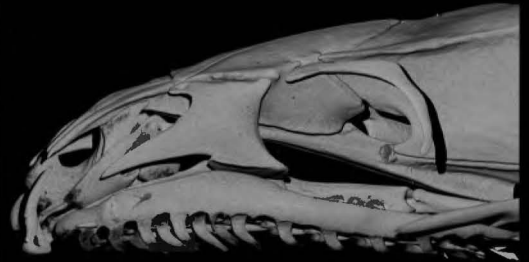

*Atretium schistosum*

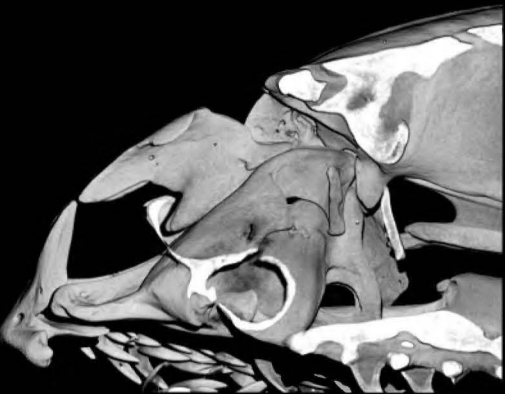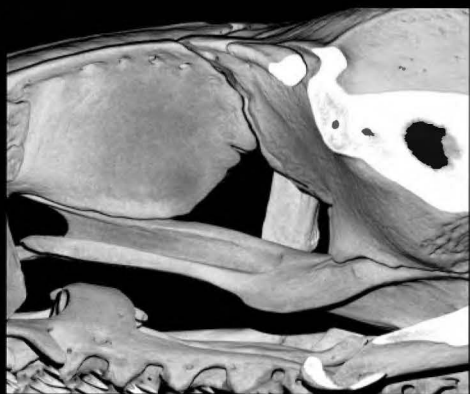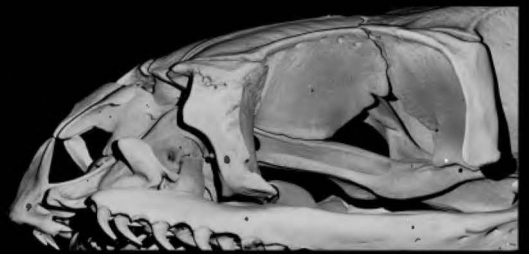

*Lycognathophis seychellensis*

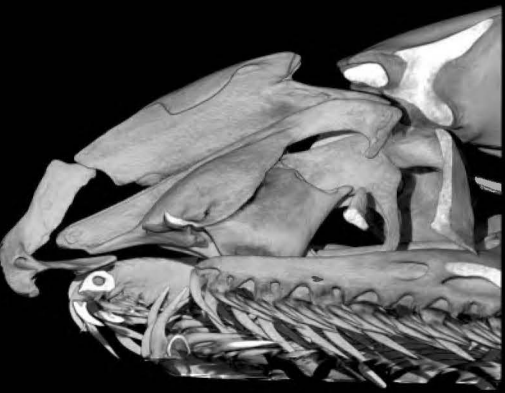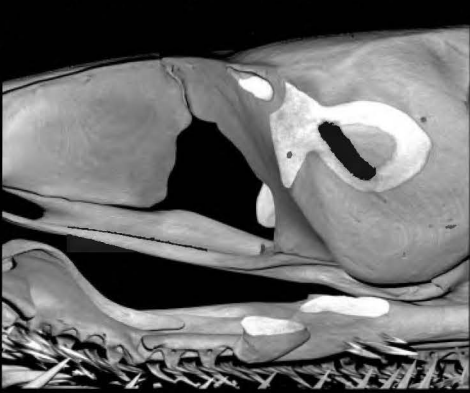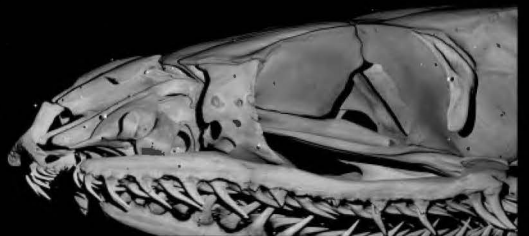

Fig. R

Natricidae

Lateral

Oblique

*Natriciteres fuliginoides*

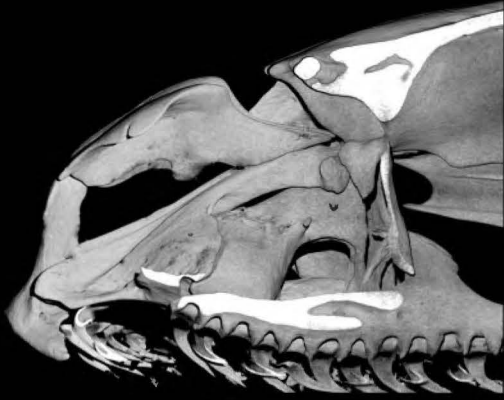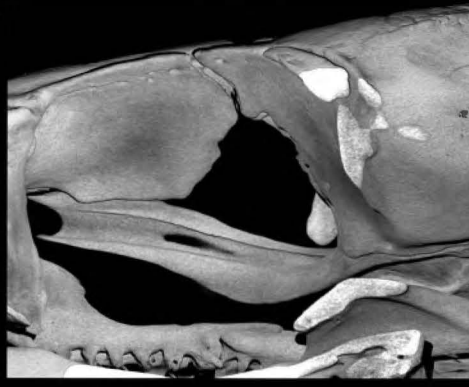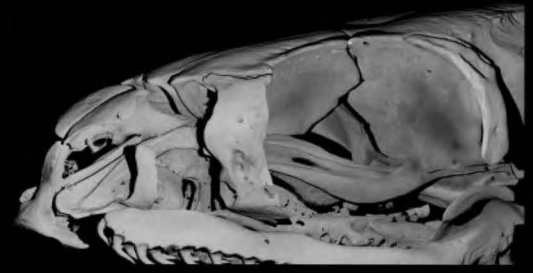

*Natrix maura*

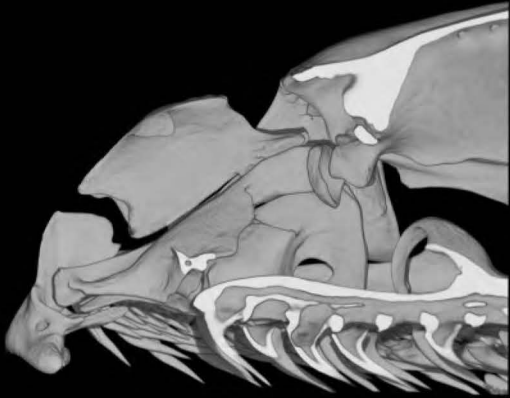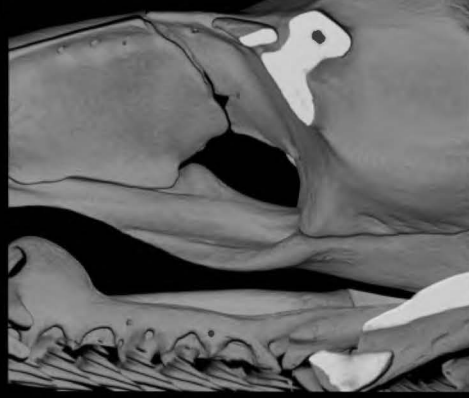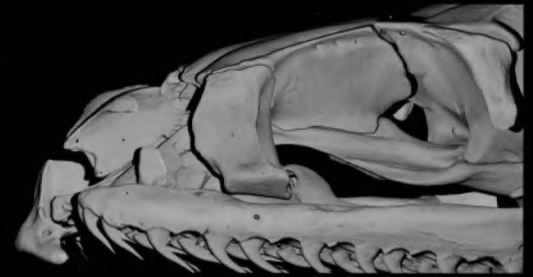

*Sinonatrix annularis*

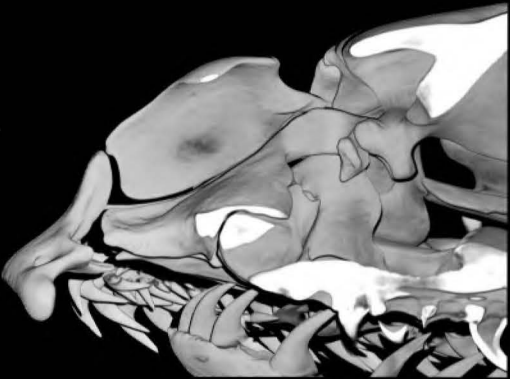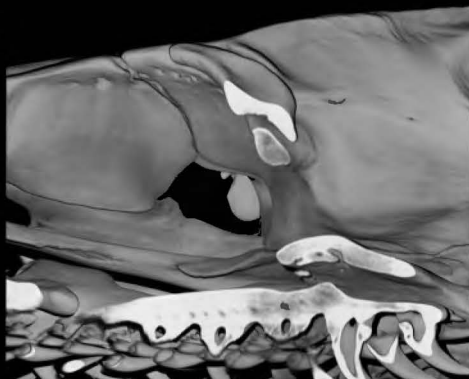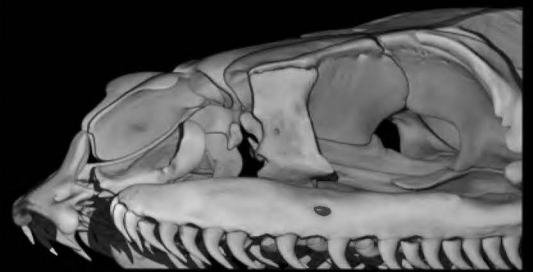

*Xenochrophis cerogaster*

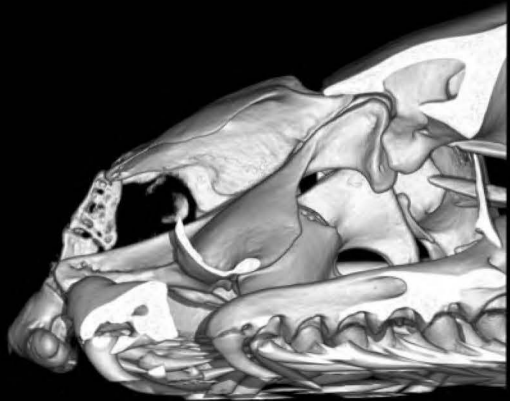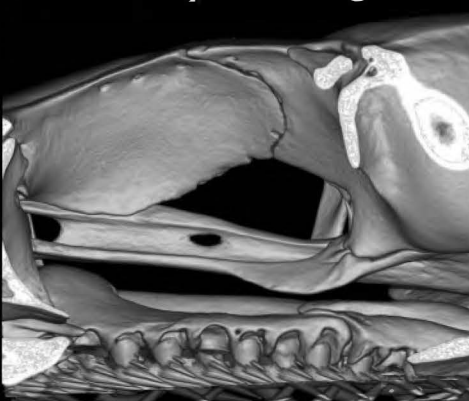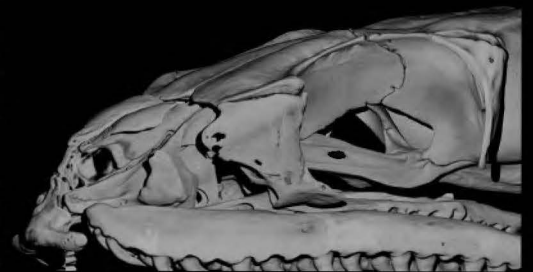

Fig. S

Dipsadidae

Lateral

Oblique

*Apostolepis cf. nelsonjorgei*

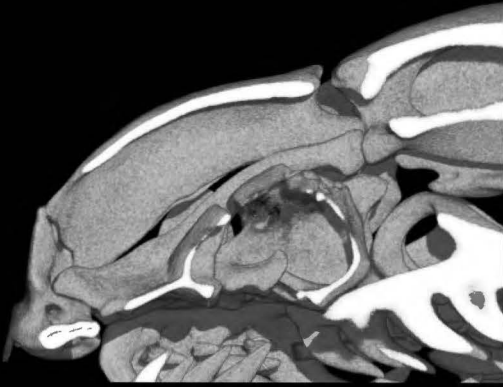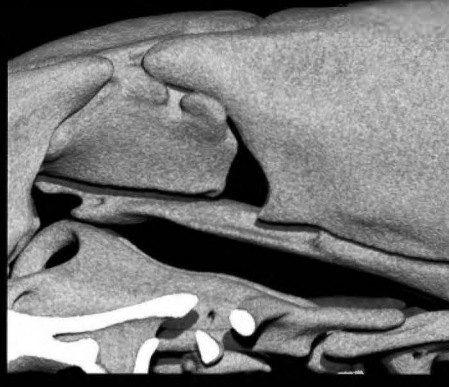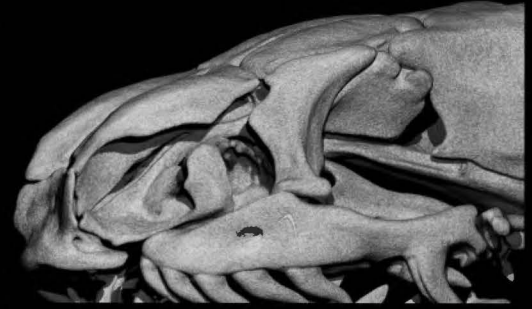

*Atractus maculatus*

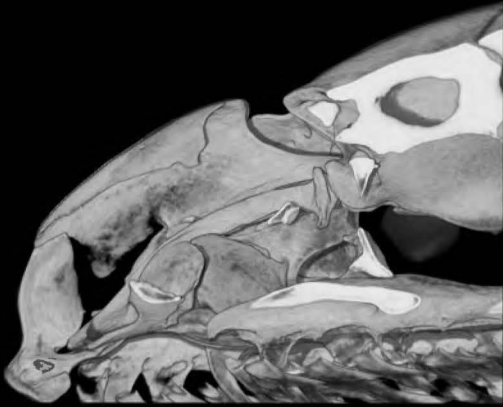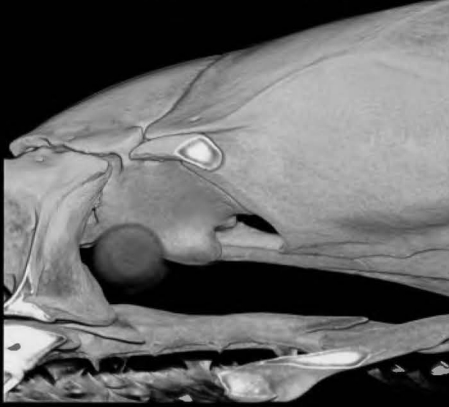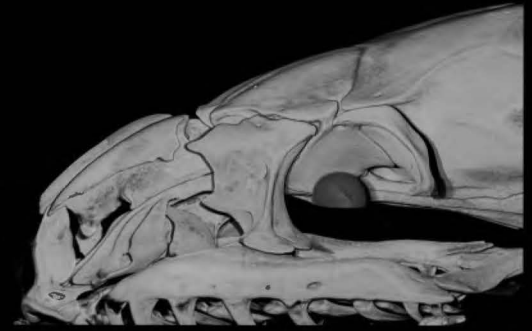

*Conophis pulcher*

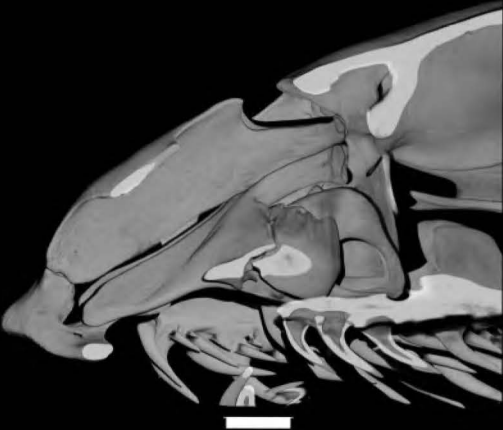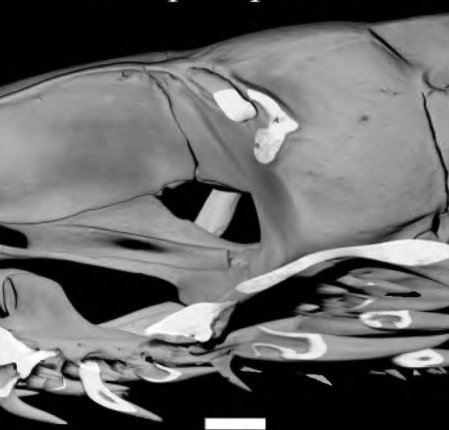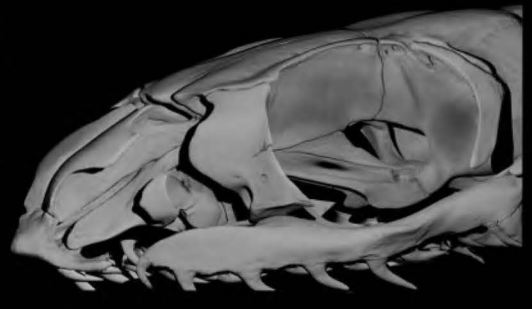

*Contia tenuis*

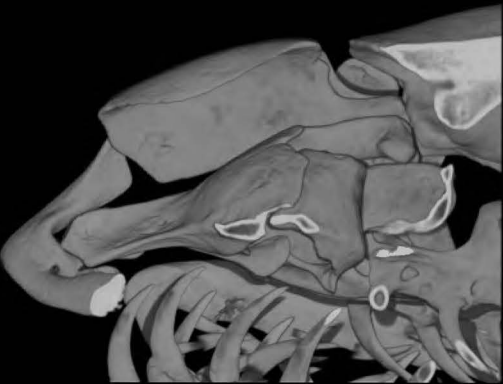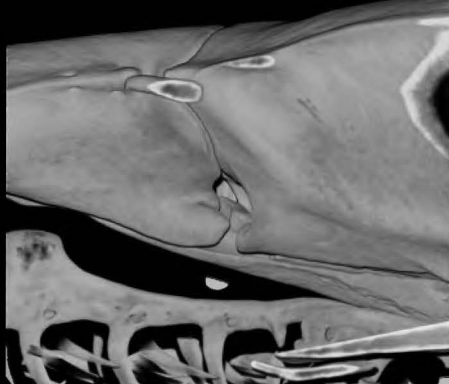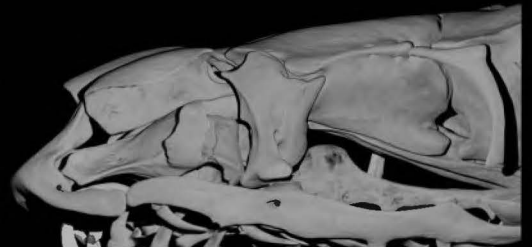



Fig. T

Dipsadidae

Lateral

Oblique

*Farancia abacura*

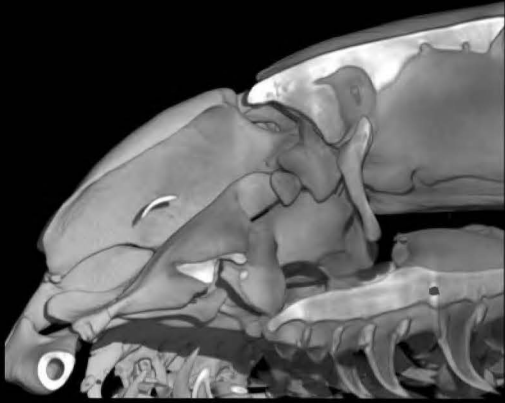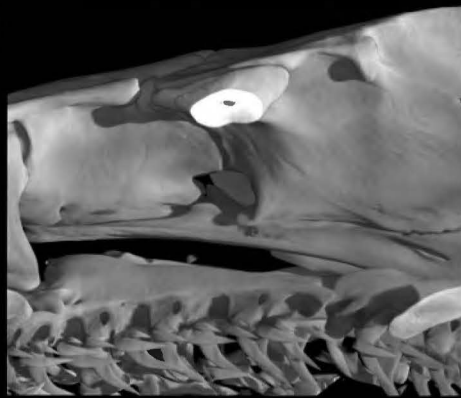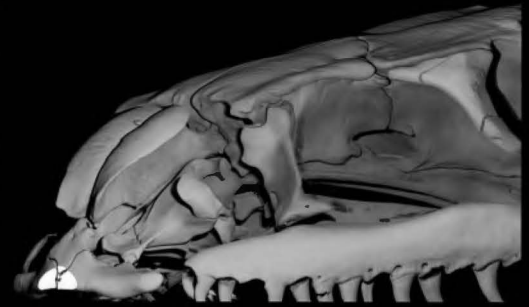

*Geophis hoffmanni*

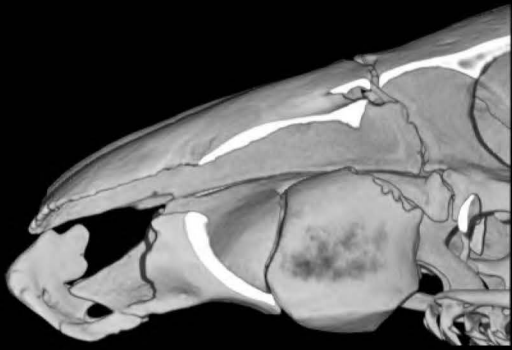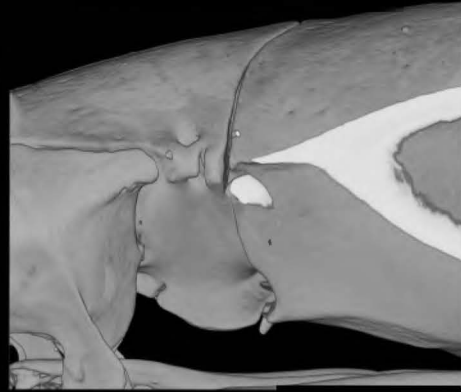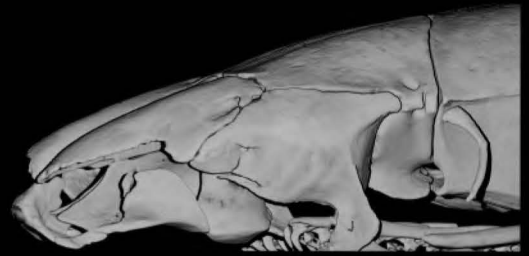

*Helicops pastazae*

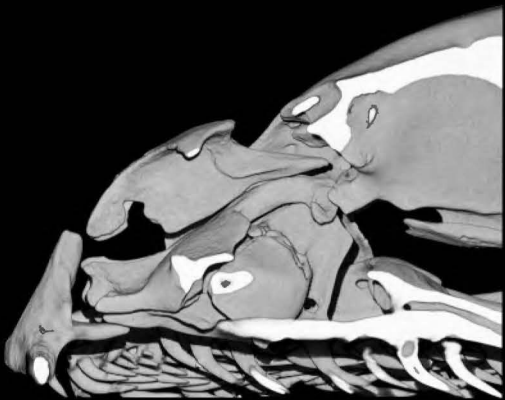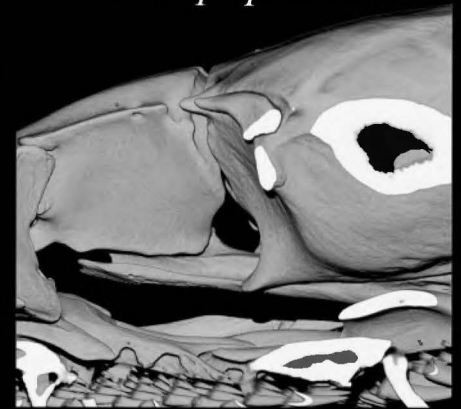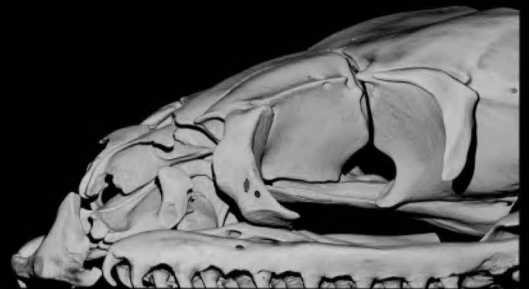

*Heterodon nasicus*

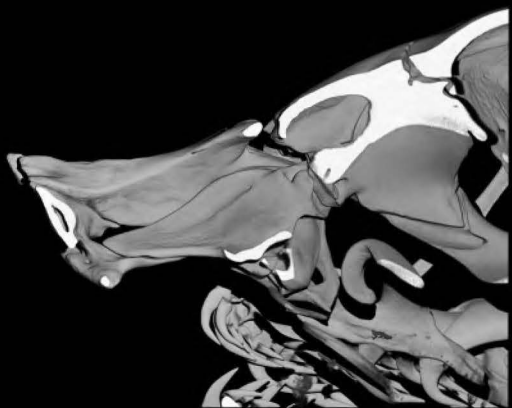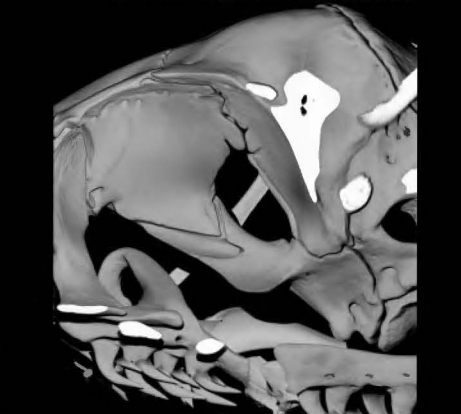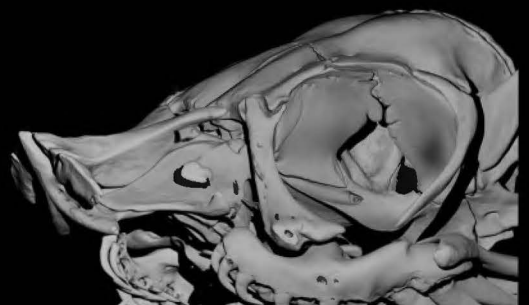

Fig. U

Dipsadidae

Lateral

Oblique

*Philodryas mattogrossensis*

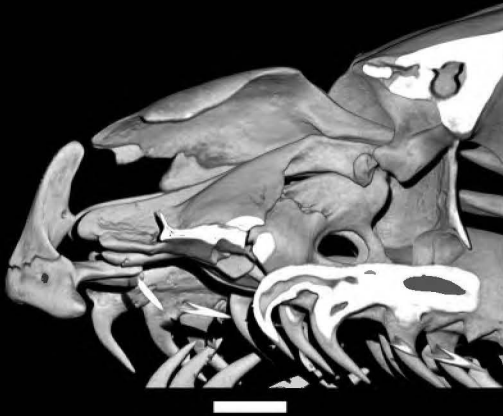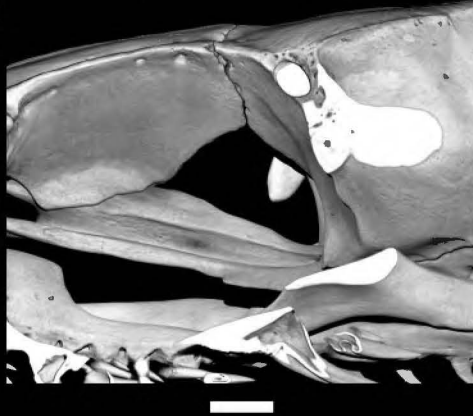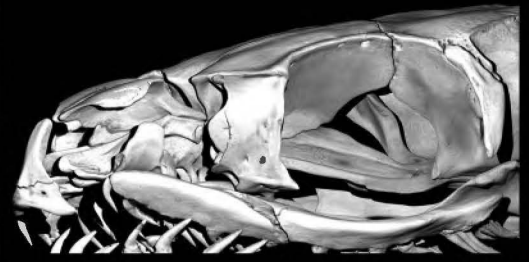

*Sibon sartorii*

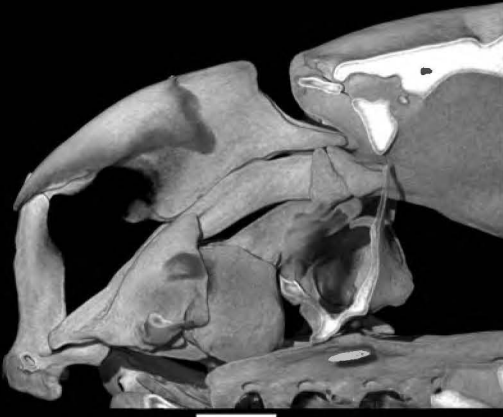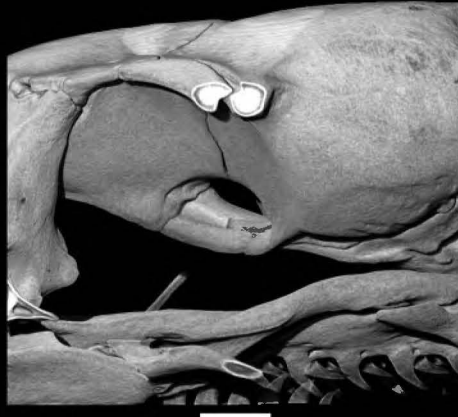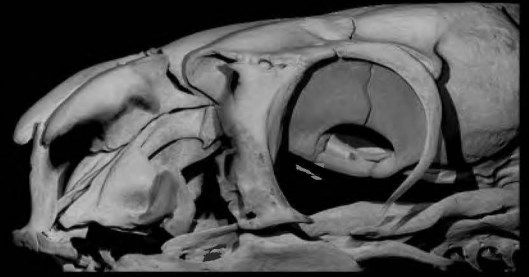

*Tachymenis peruviana*

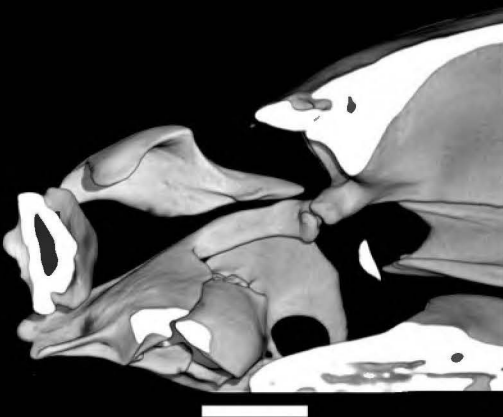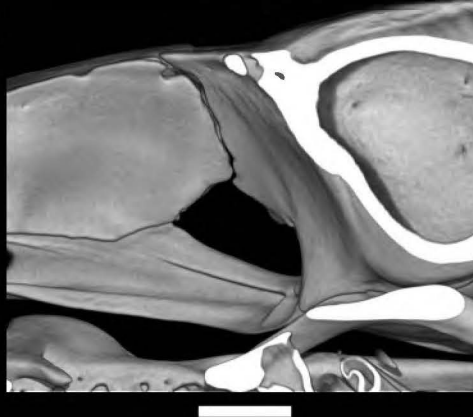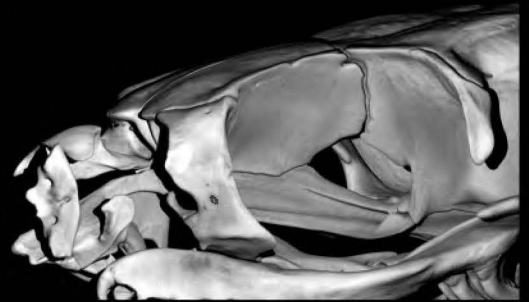

*Urotheca multilineata*

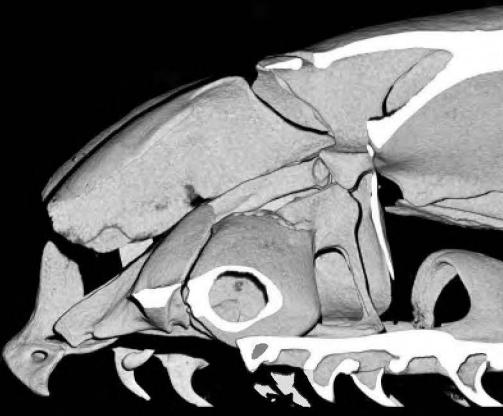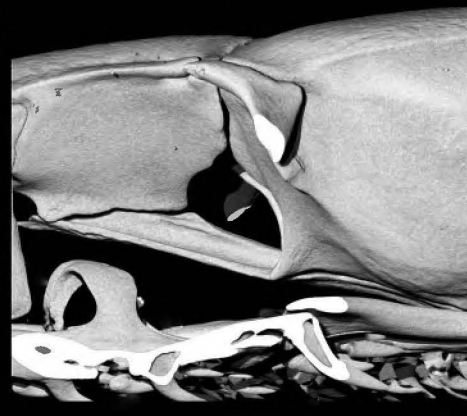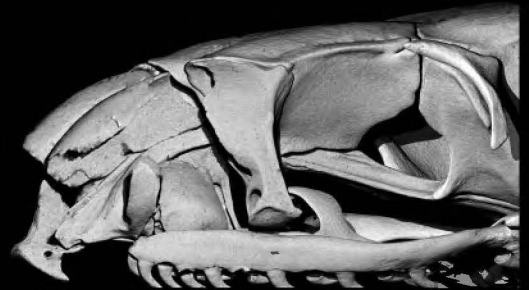



Fig. V

Dipsadidae

Lateral

Oblique

*Xenopholis scalaris*

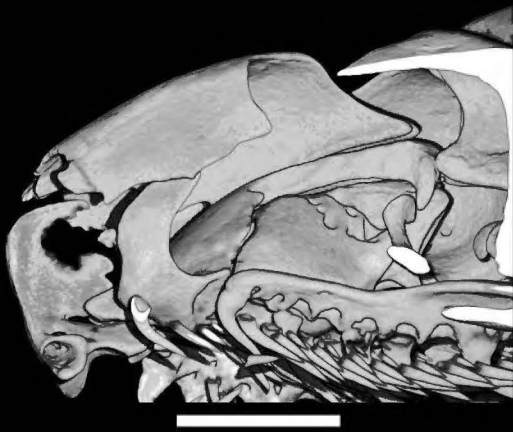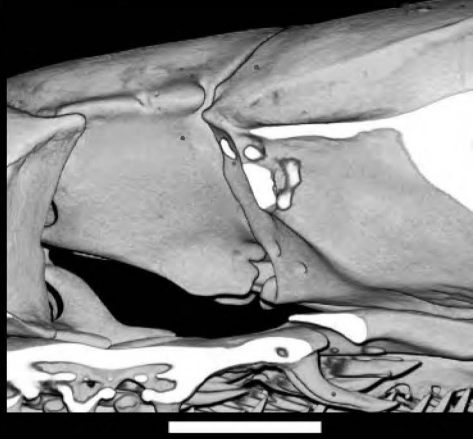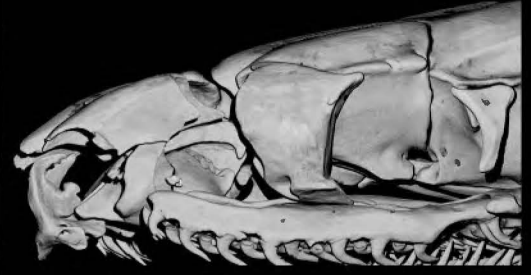

Sibynophiidae

Lateral

Oblique

*Scaphiodontophis annulatus*

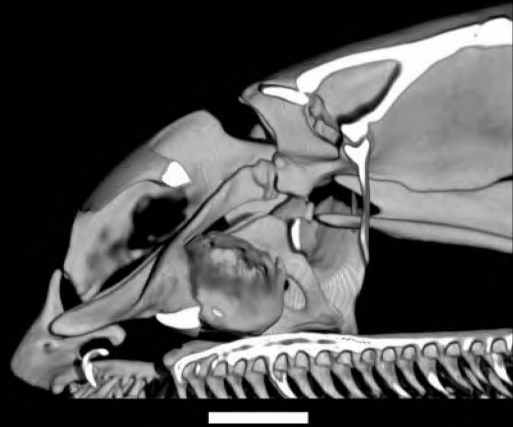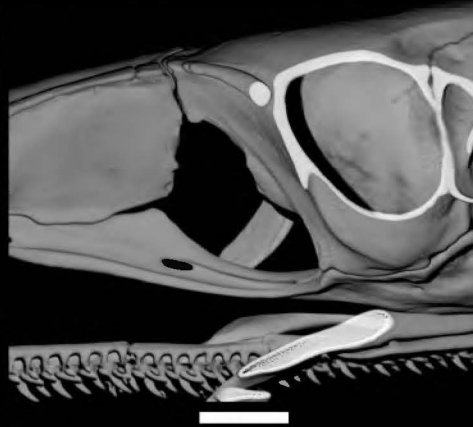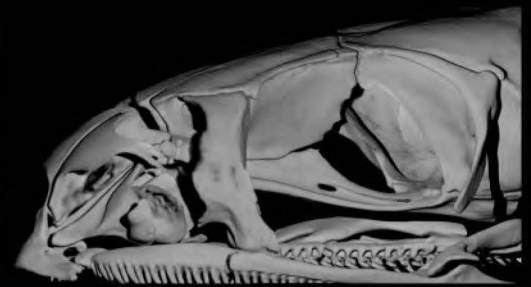

*Sibynophis subpunctatus*

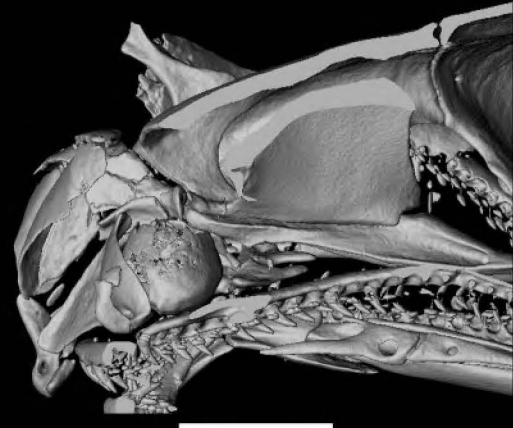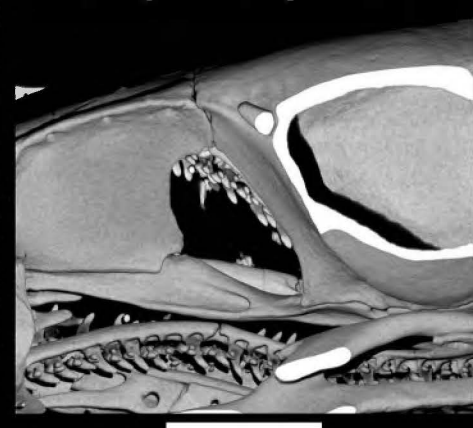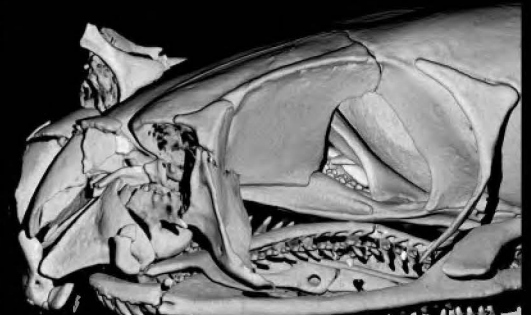

Fig. W

Sibynophiidae

Lateral

Oblique

*Colubroelaps nguyenvansangi*

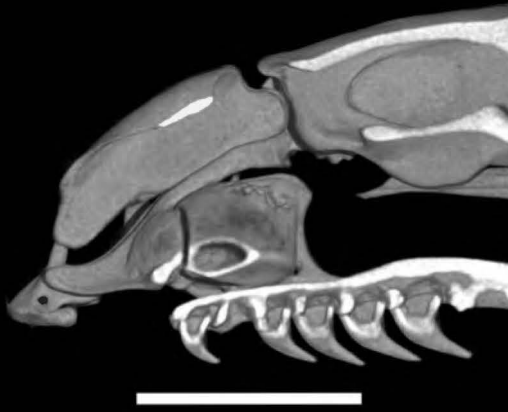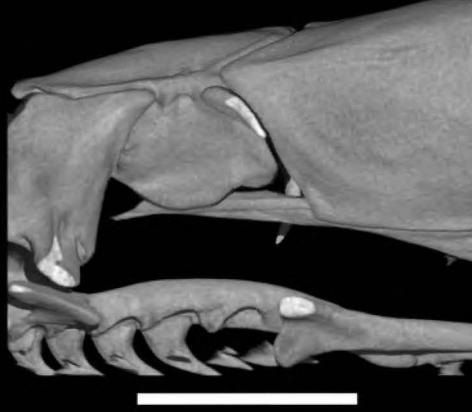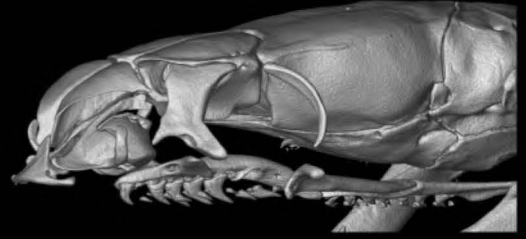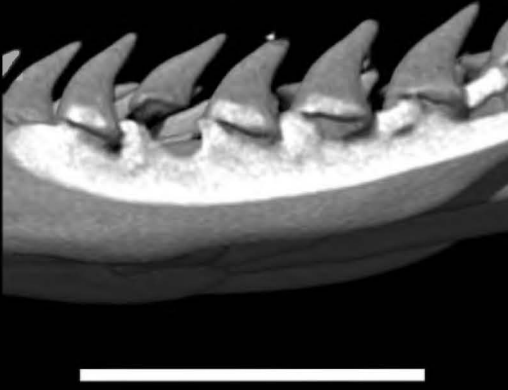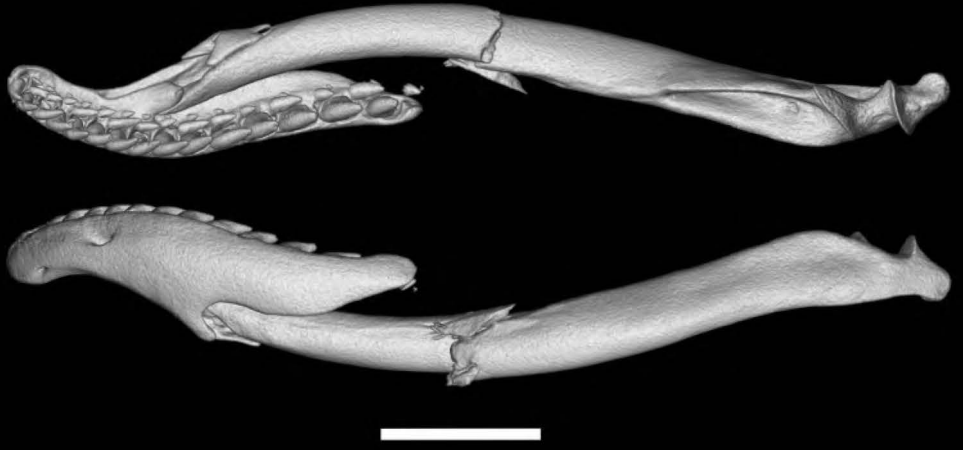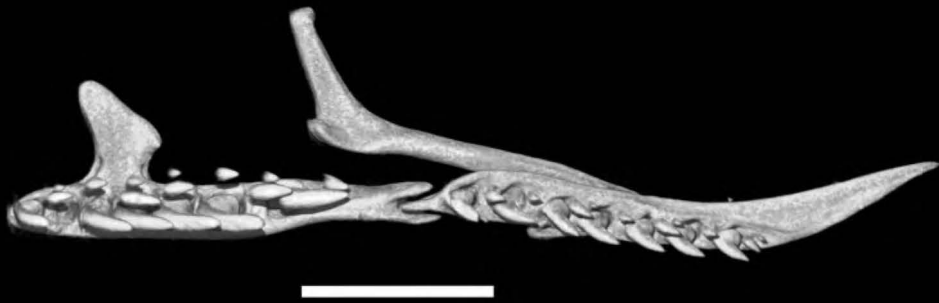

Fig. X

Calamariidae

Lateral

Oblique

*Calamaria gervaisi*

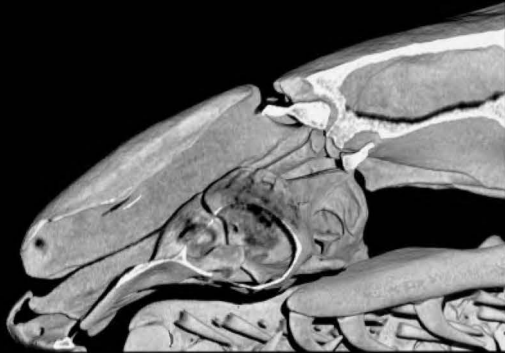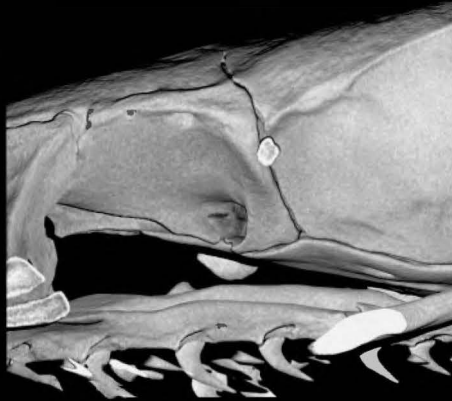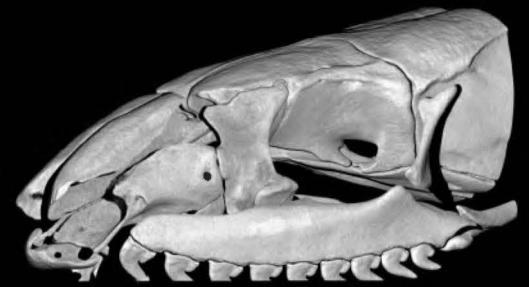

*Macrocalamus lateralis*

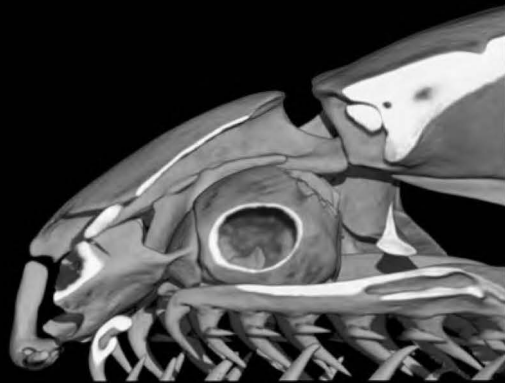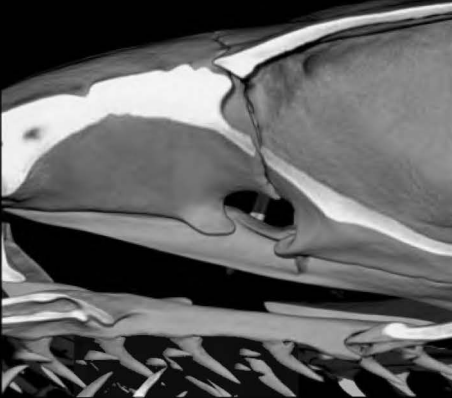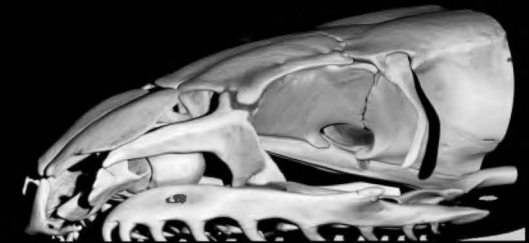

*Oreocalamus hanitschi*

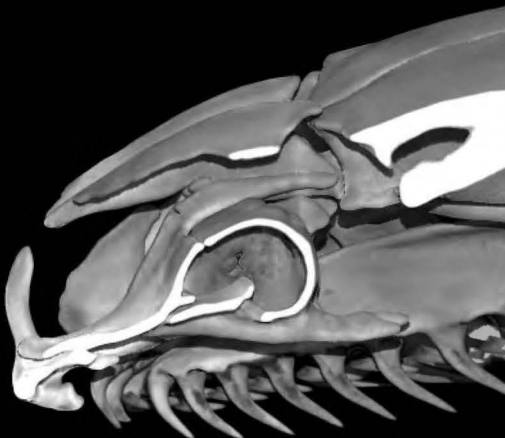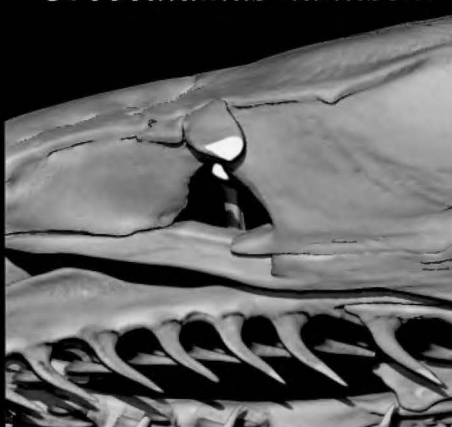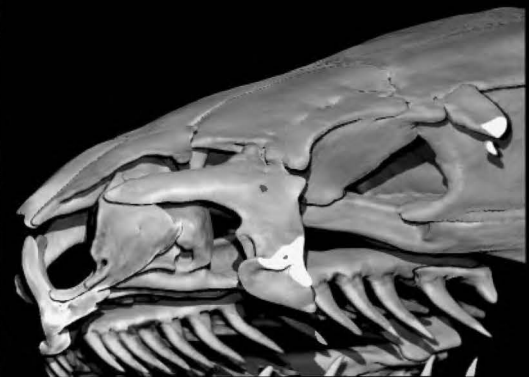

Fig. Y

Grayiidae

Lateral

Oblique

*Grayia smithii*

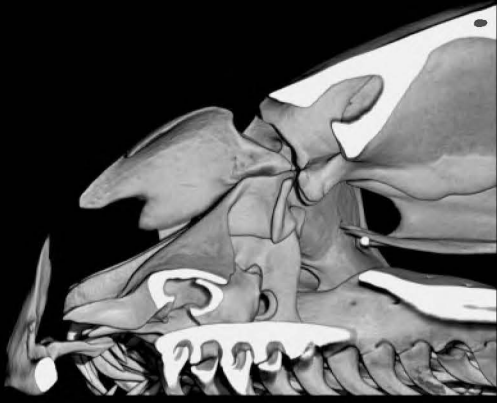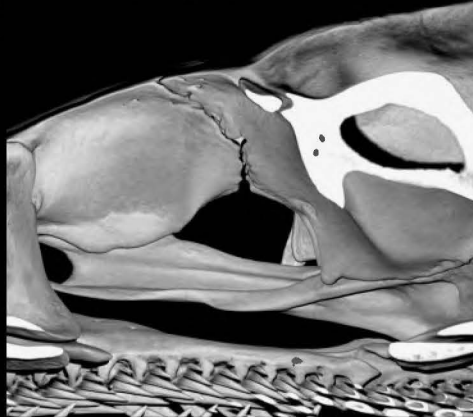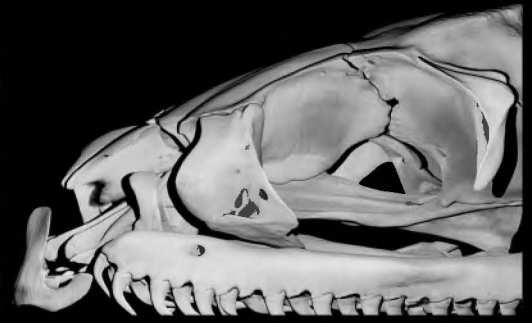

Colubridae

Lateral

Oblique

*Boiga dendrophila*

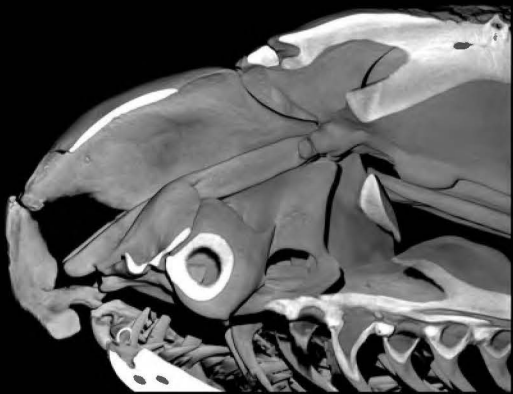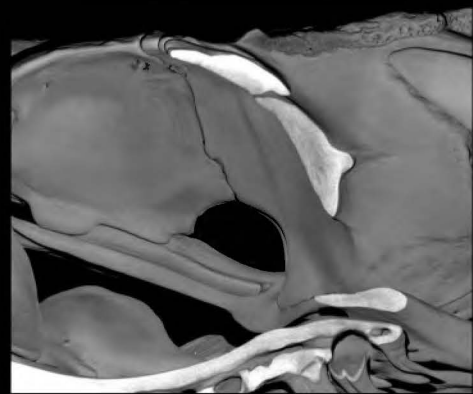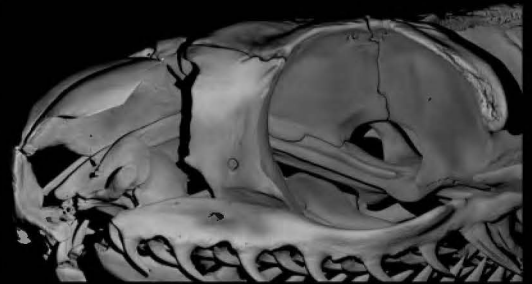

*Coluber constrictor*

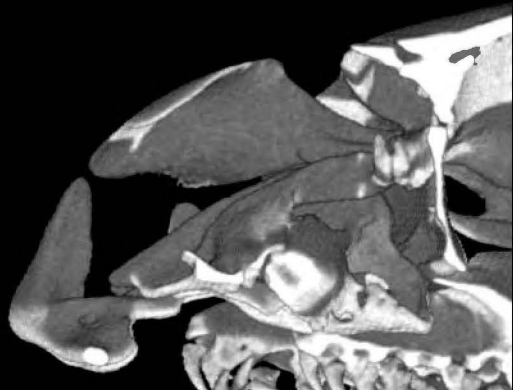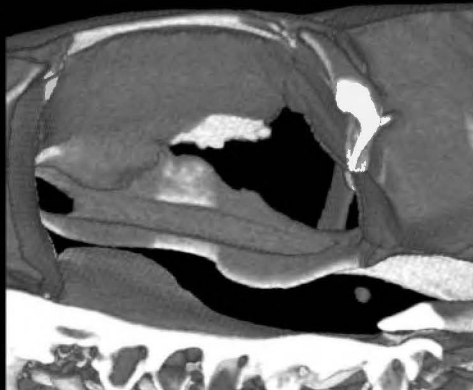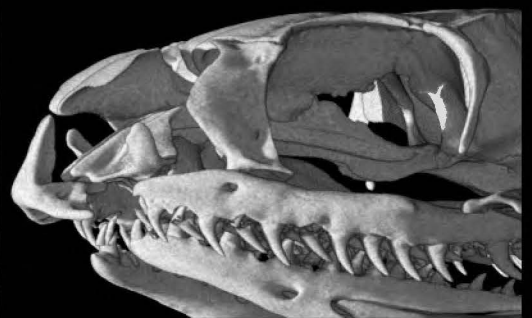

Fig. Z

Colubridae

Lateral

Oblique

*Dendrelaphis papuensis*

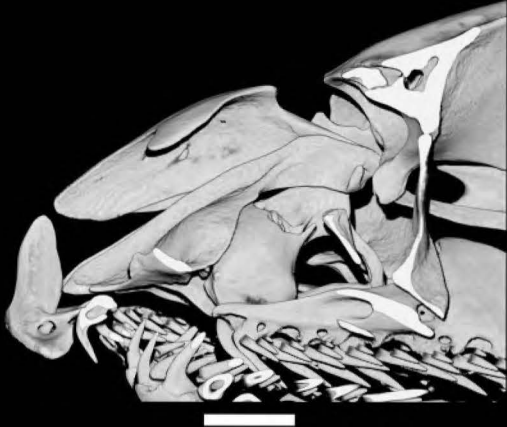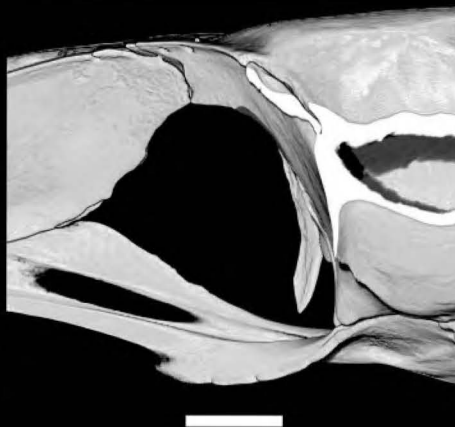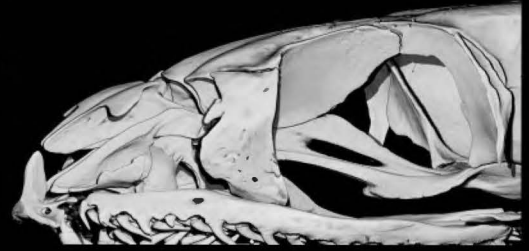

*Ptyas mucosus*

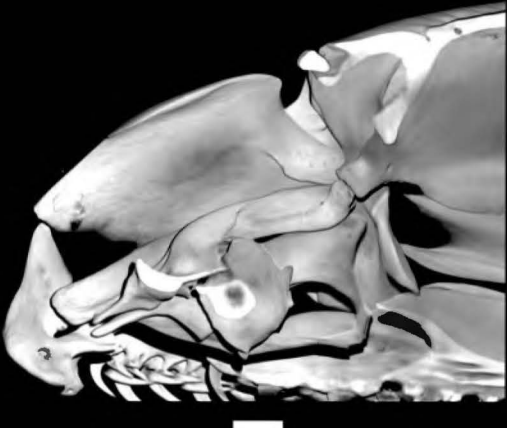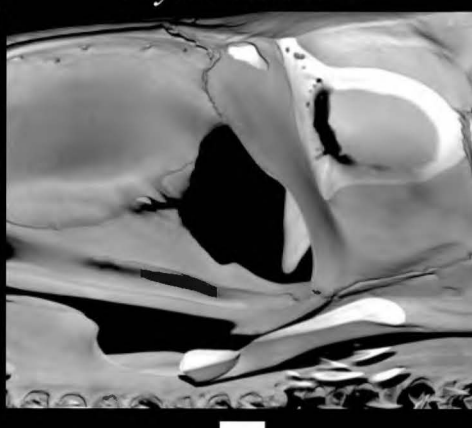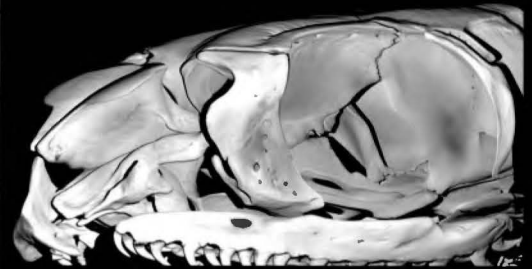

*Scaphiophis albopunctatus*

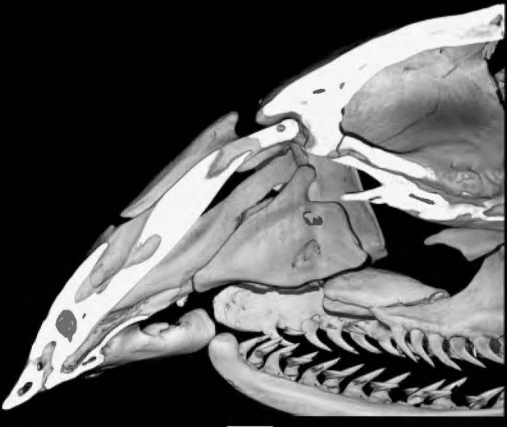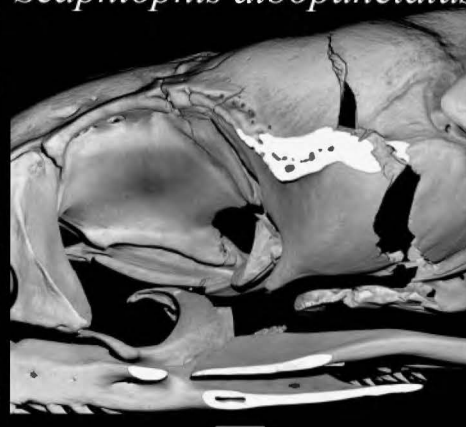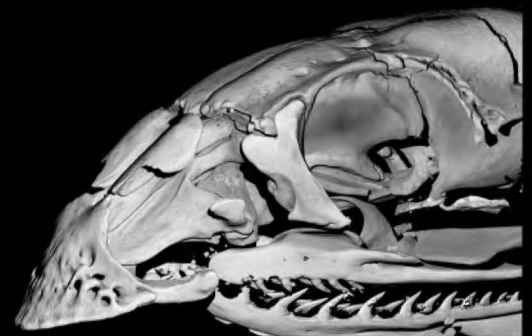

*Senticolis triaspis*

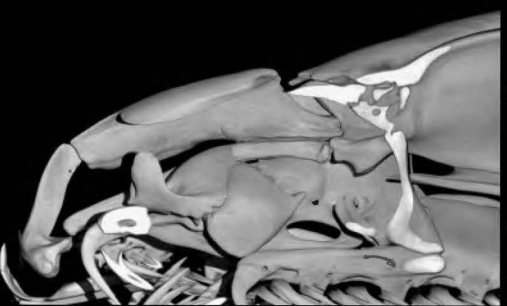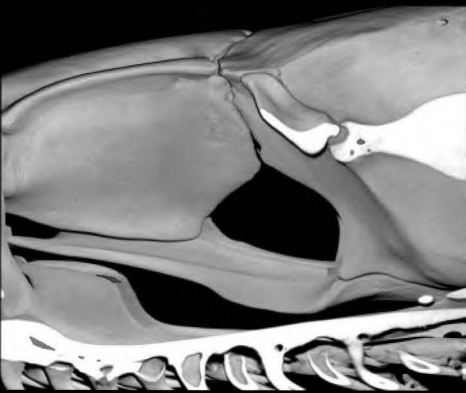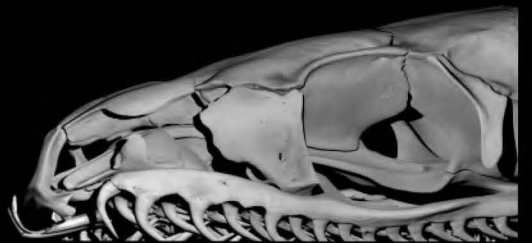



Fig. AA

Colubridae

Lateral

Oblique

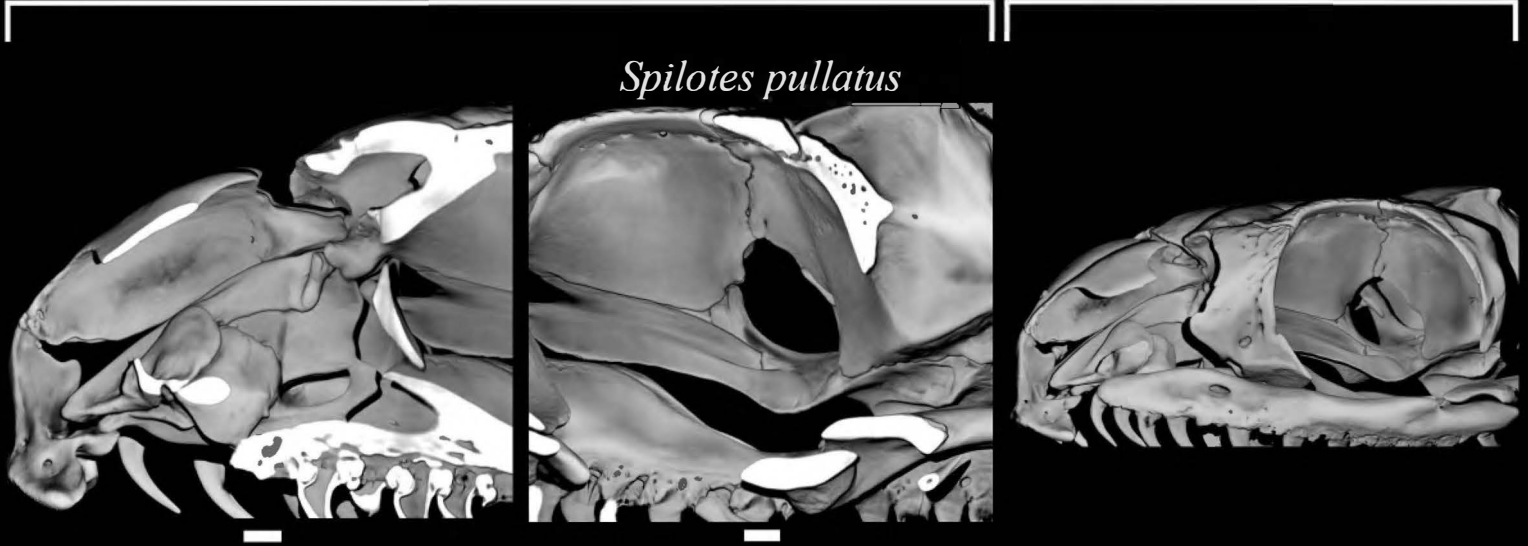

Colubridae *incertae sedis*

Lateral

Oblique

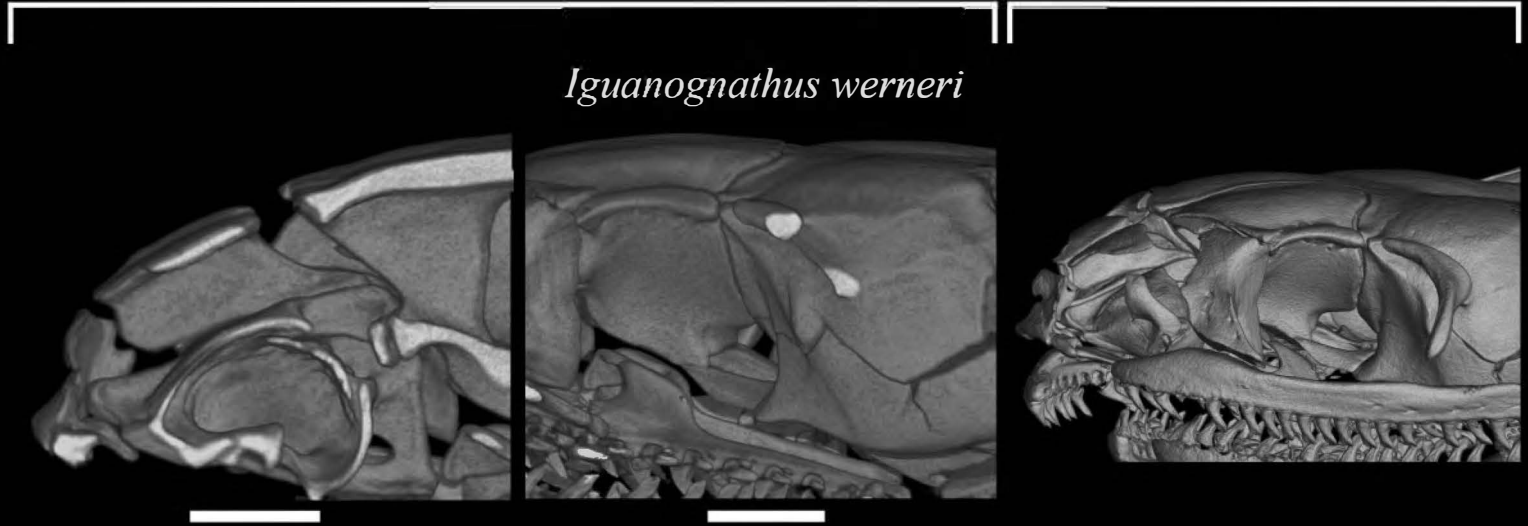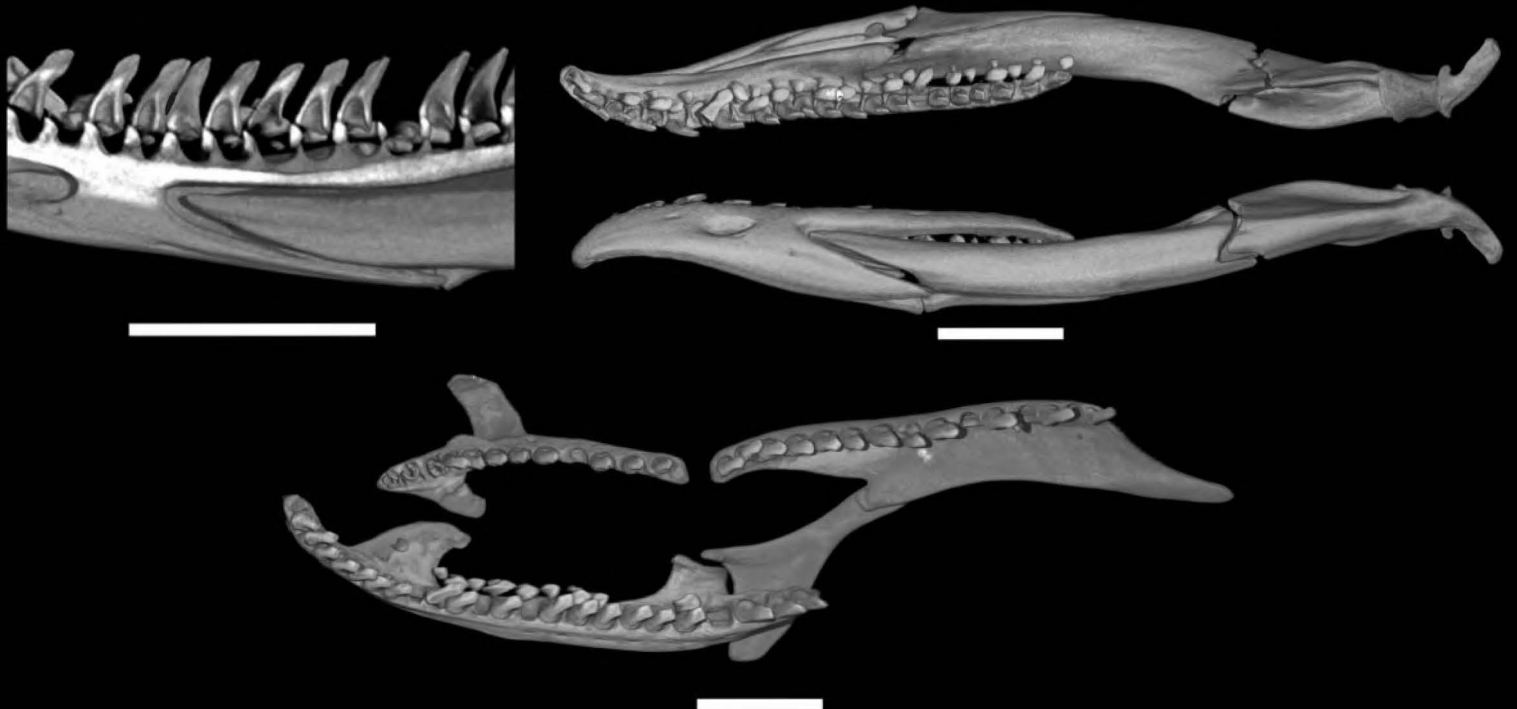



Fig. AB

*Elapoidea incertae sedis*

Lateral

Oblique

*Buroma depressiceps*

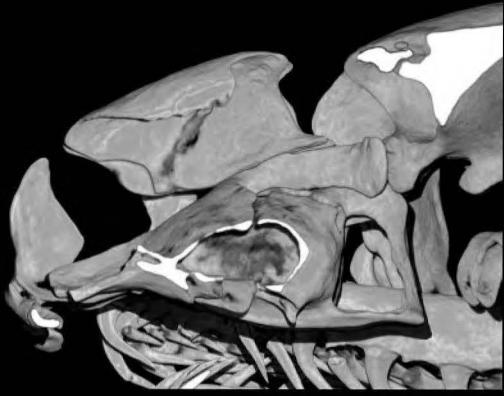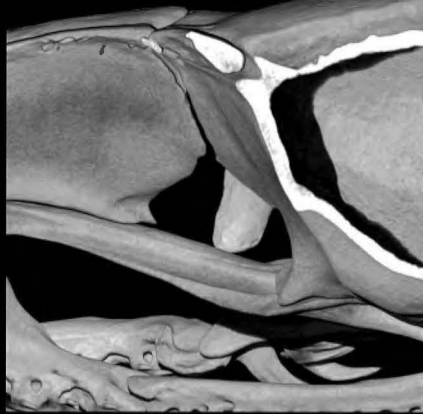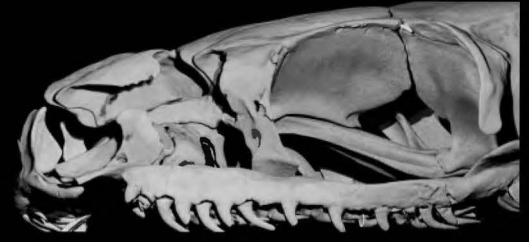

*Micrelaps muelleri*

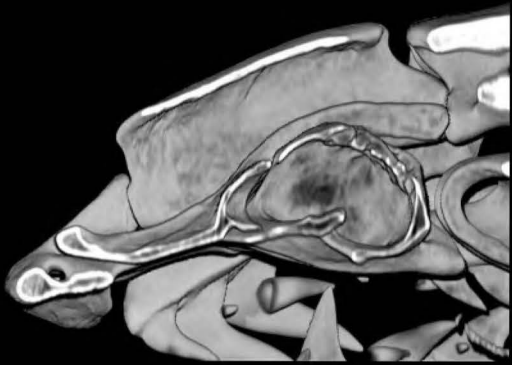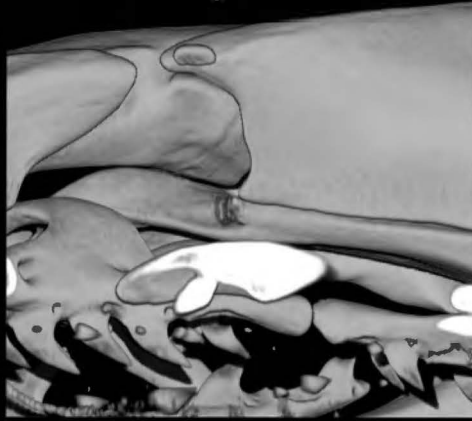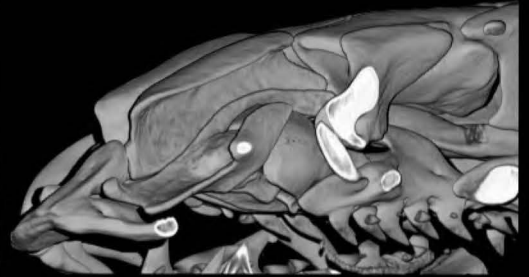

Supplement: pone.0216148.s015.pdf [file pone.0216148.s015.pdf]
