# Supplementary material for: Large-scale molecular phylogeny, morphology, divergence-time estimation, and the fossil record of advanced caenophidian snakes (Squamata: Serpentes)
Source: PubMed Central journal article supplement (PMC6512042; doi:10.1371/journal.pone.0216148), 2019-05-10

## **S2 Appendix**

**Fig. A**

**Acrochordidae**

**Xenodermidae**

**Pareidae**

*Acrochordus javanicus*

*Achalinus rufescens*

*Fimbrios klossi*

*Pareas sp.*

Anterior

Posterior

Lateral

Dorsal

Ventral

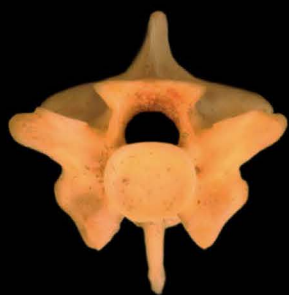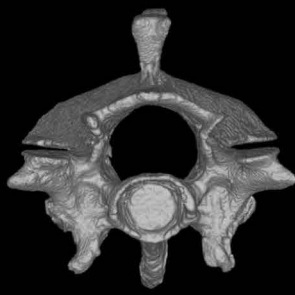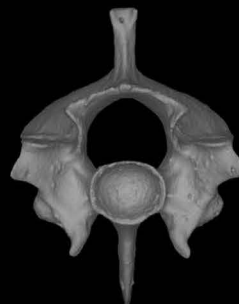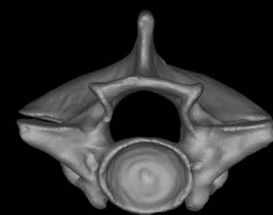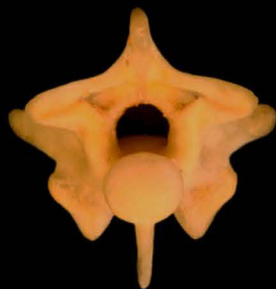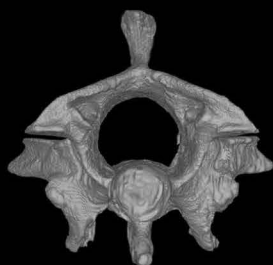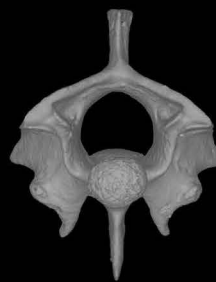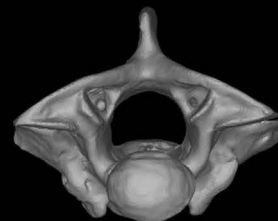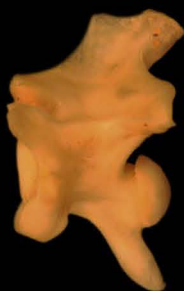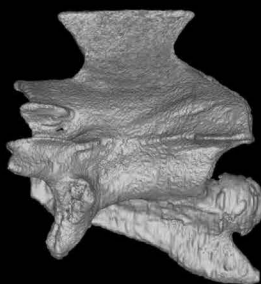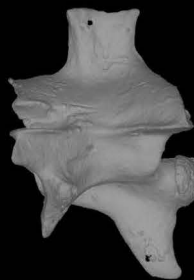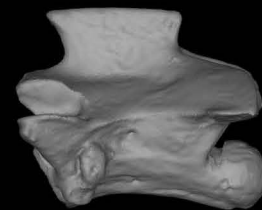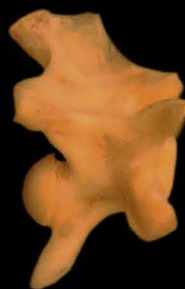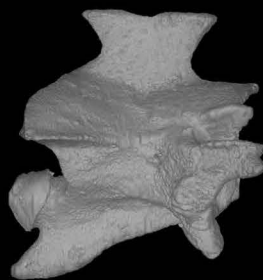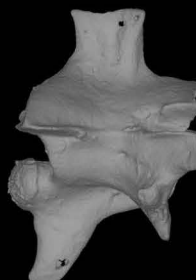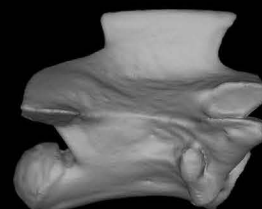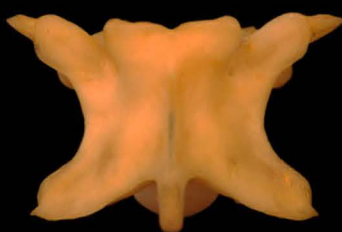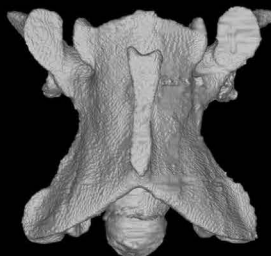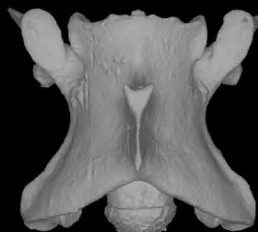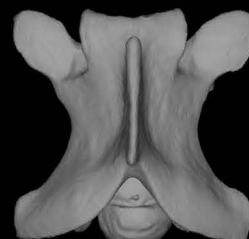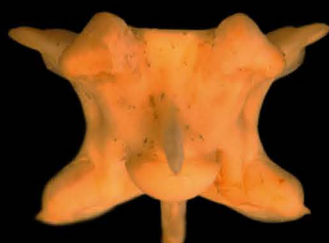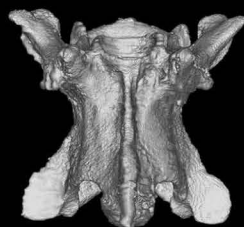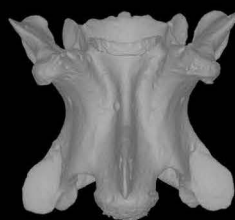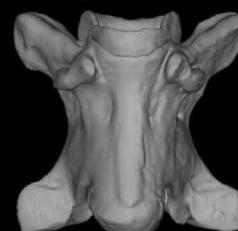

Fig. B

Viperidae

*Causus defilippi*

*Vipera ursinii*

*Azemiops feae*

*Bothrops jararaca*

Anterior

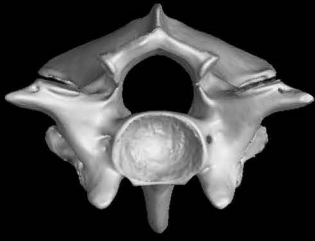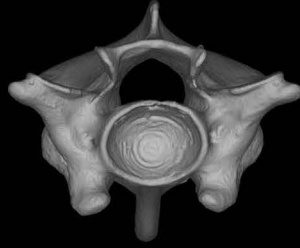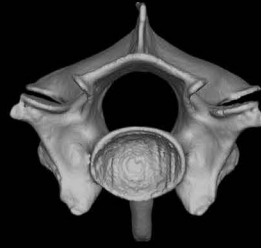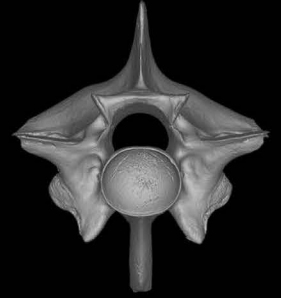

Posterior

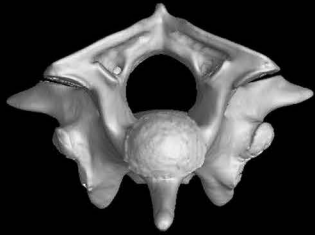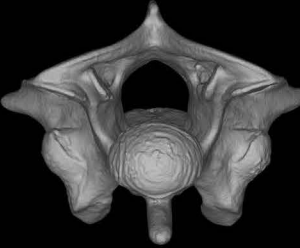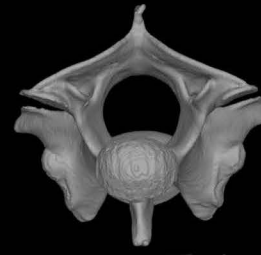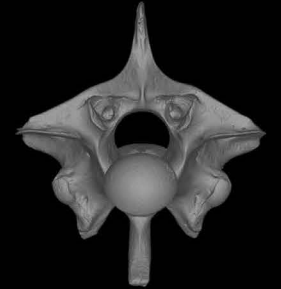

Lateral

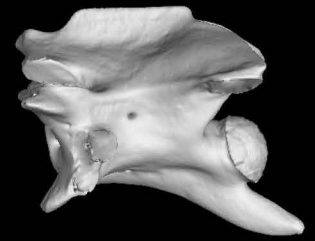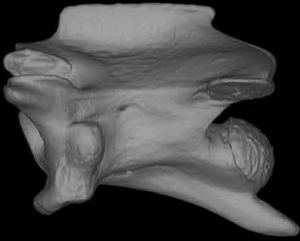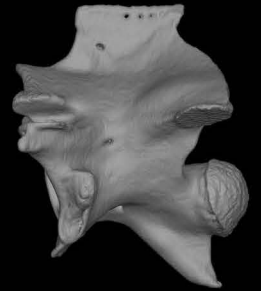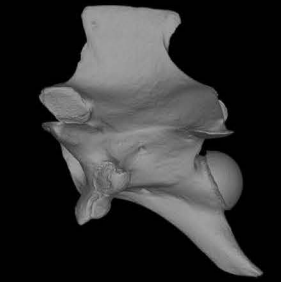

Dorsal

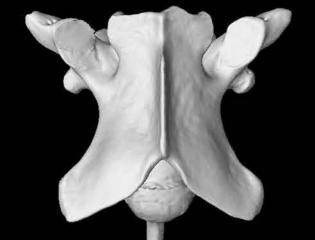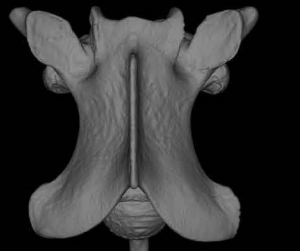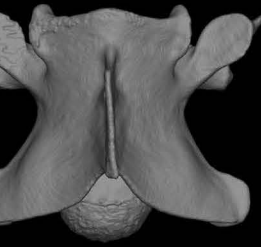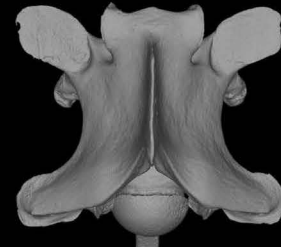

Ventral

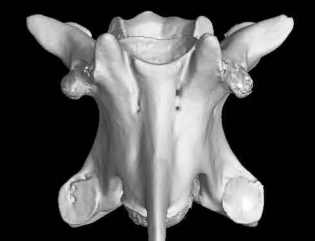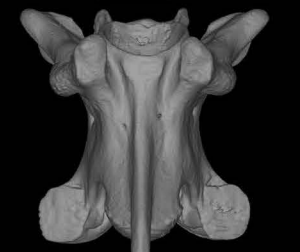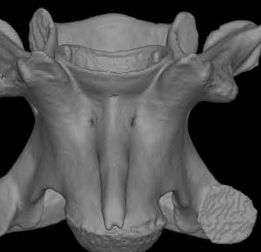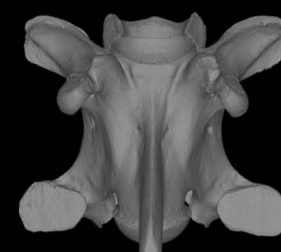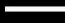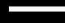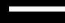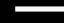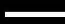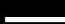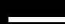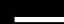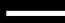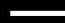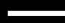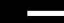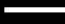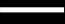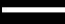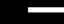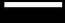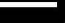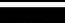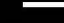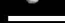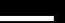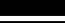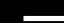

Fig. C

Homalopsidae

Psammophiidae

*Cerberus rynchops*

*Homalopsis buccata*

*Psammophis lineolatus*

*Mimophis mahfalensis*

Anterior

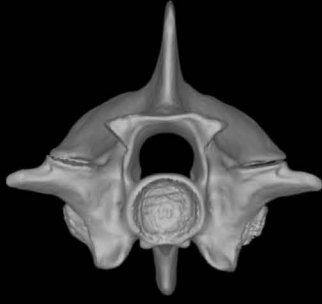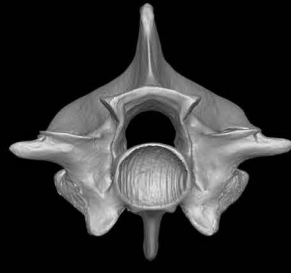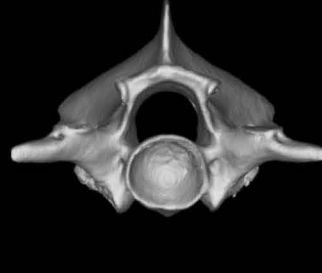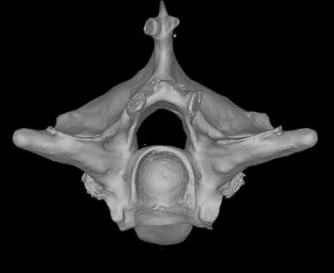

Posterior

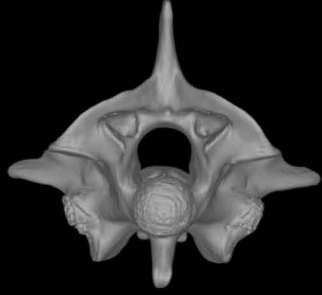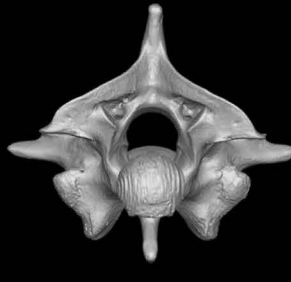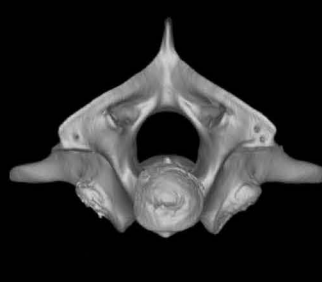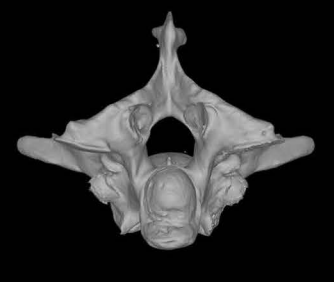

Lateral

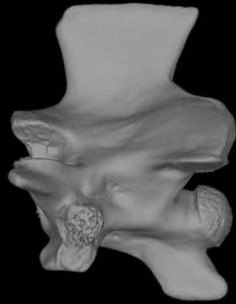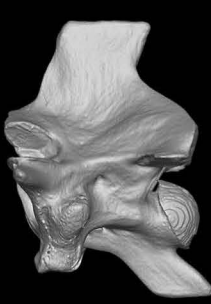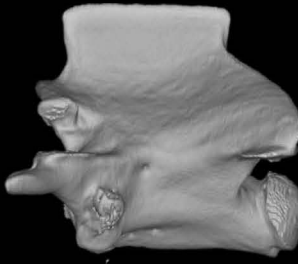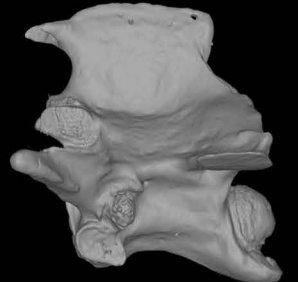

Dorsal

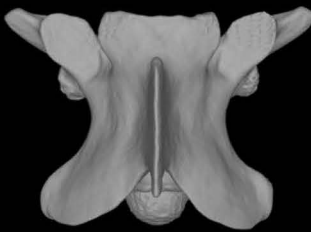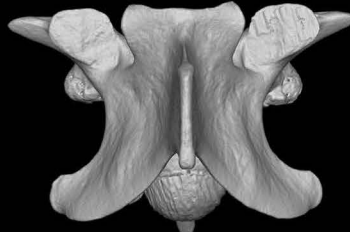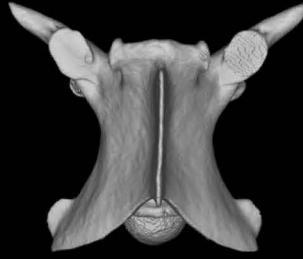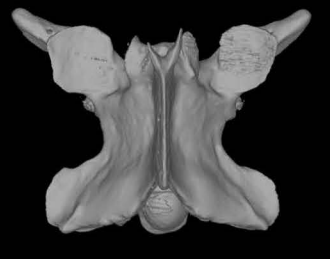

Ventral

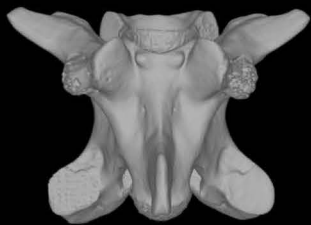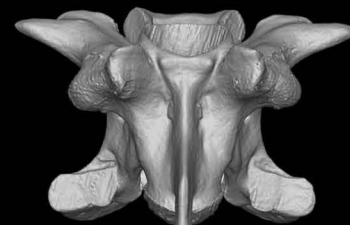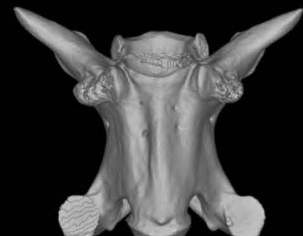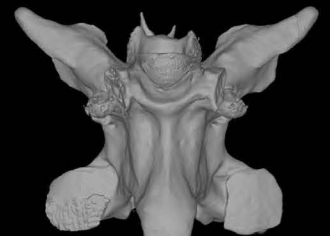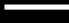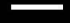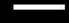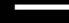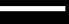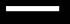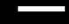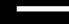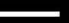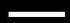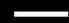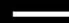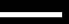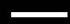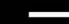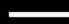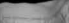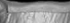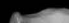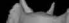



**Fig. D**

**Pseudoxyrhopiidae**

**Lamprophiidae**

*Madagascarophis colubrinus*

*Ditypophis vivax*

*Boaedon fuliginosus*

*Crotaphopeltis hotamboeia*

Anterior

Posterior

Lateral

Dorsal

Ventral

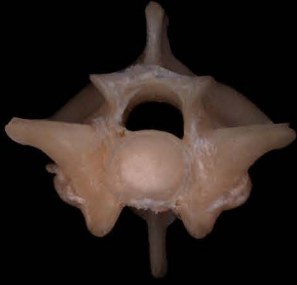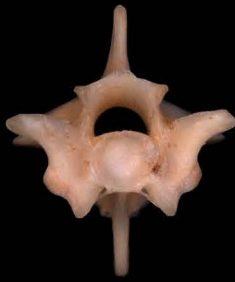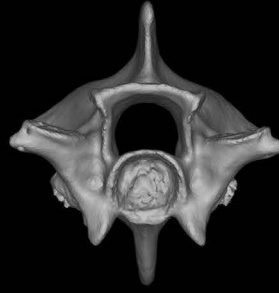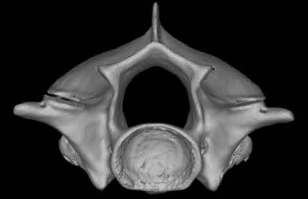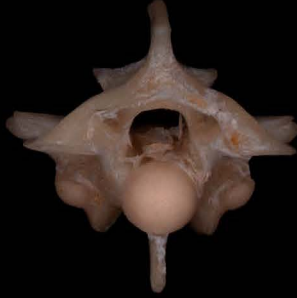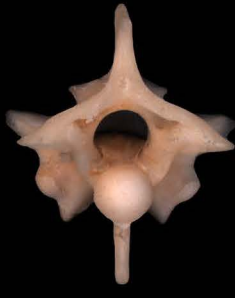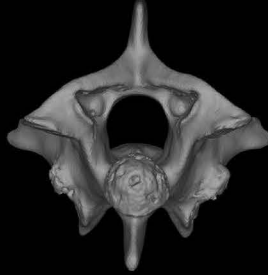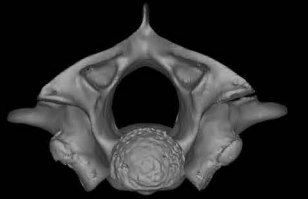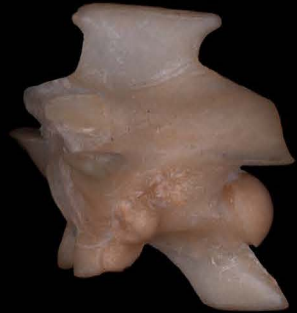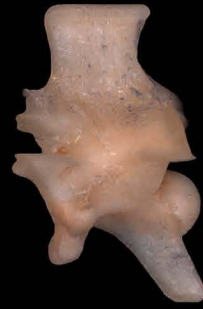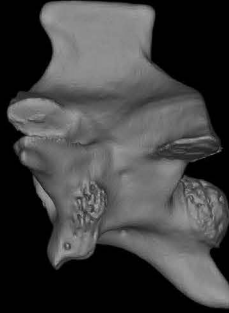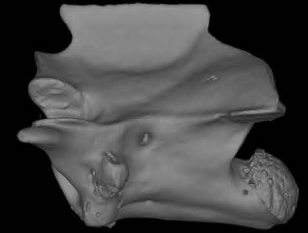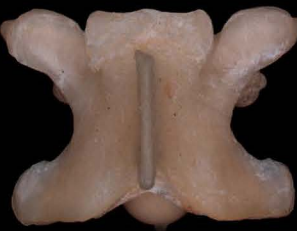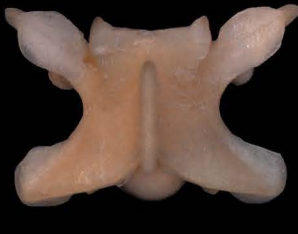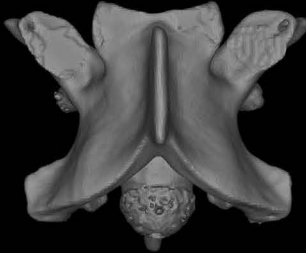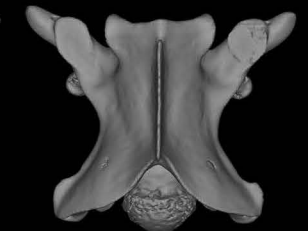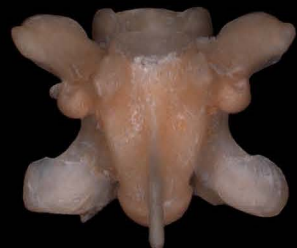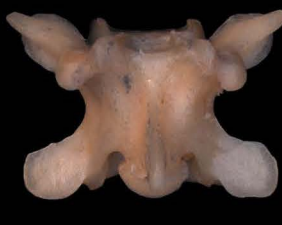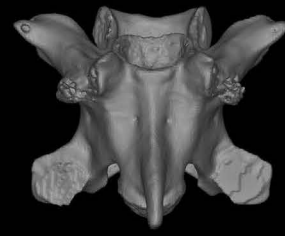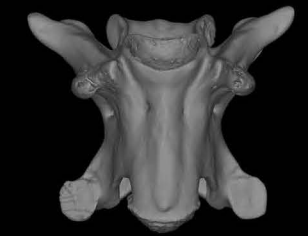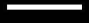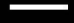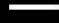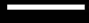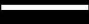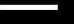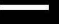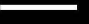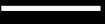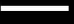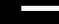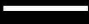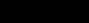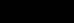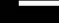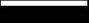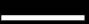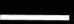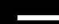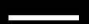

**Fig. E**

**Atractaspididae**

**Elapidae**

*Atractaspis irregularis*

*Homoroselaps lacteus*

*Sinomicrurus maclellandi*

*Naja naja*

Anterior

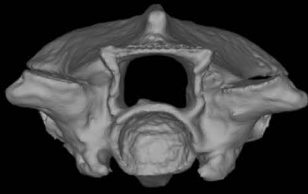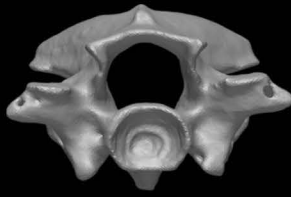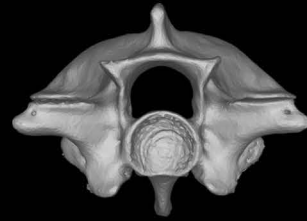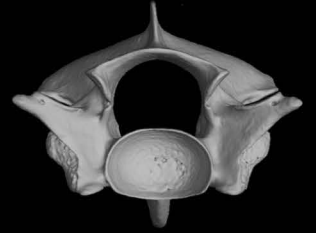

Posterior

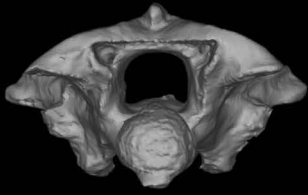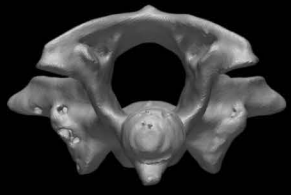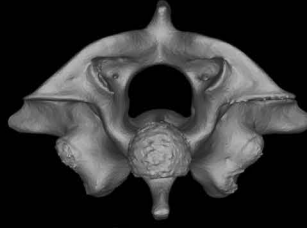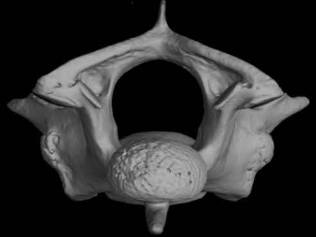

Lateral

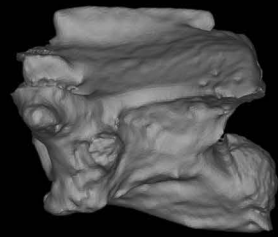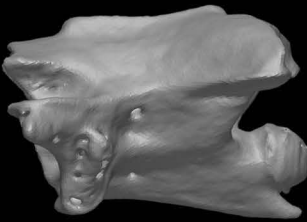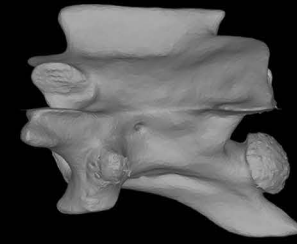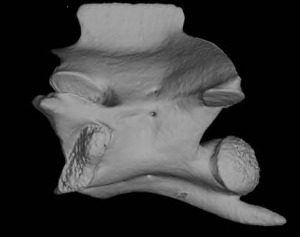

Dorsal

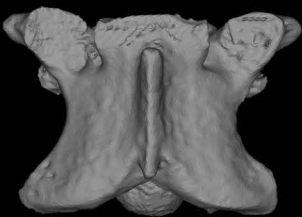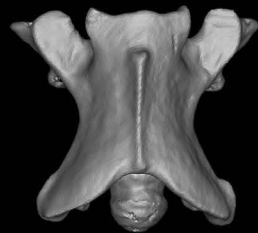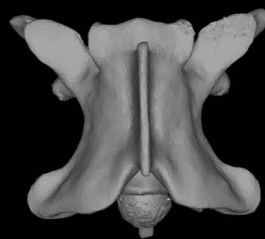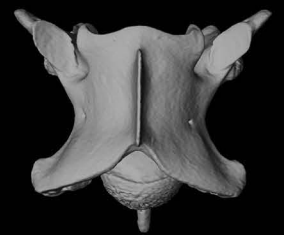

Ventral

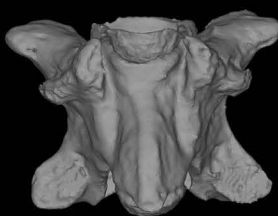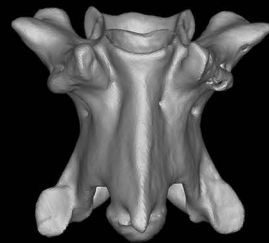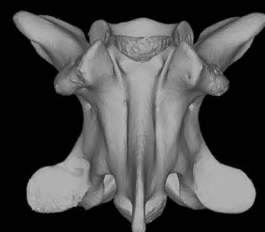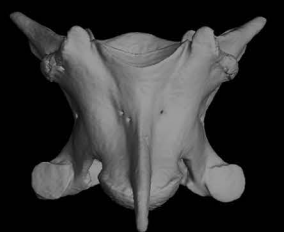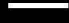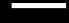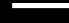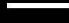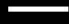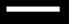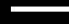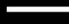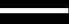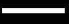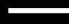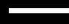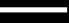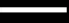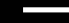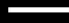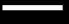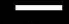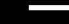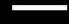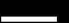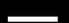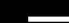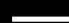

**Fig. F**

## Elapidae

## Cycloporidae

## Natricidae

*Micrurus corallinus**Cycloporus lineatus**Natrix natrix**Natriciteres olivacea*

Anterior

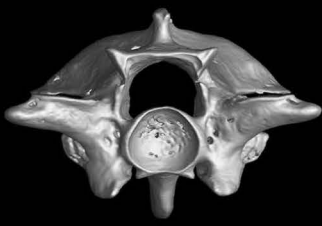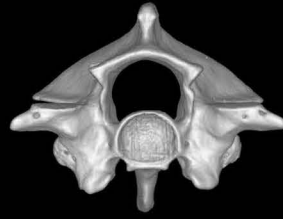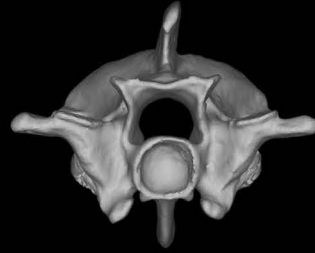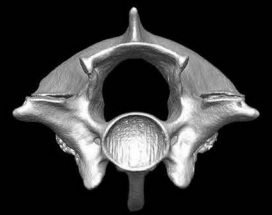

Posterior

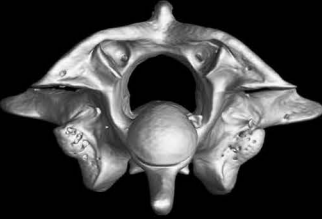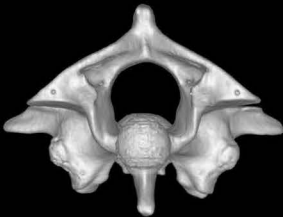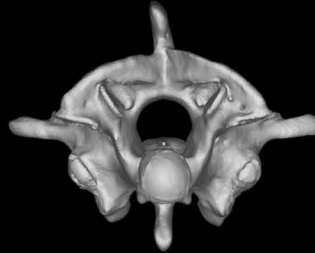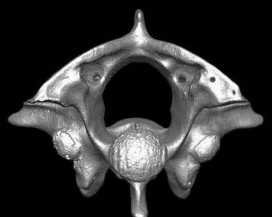

Lateral

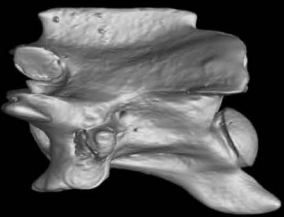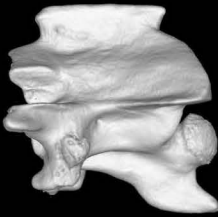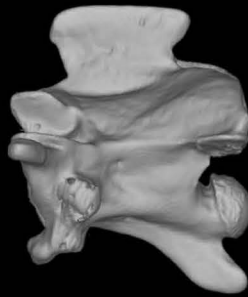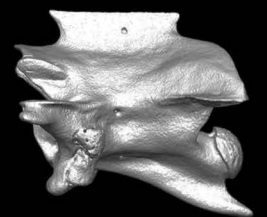

Dorsal

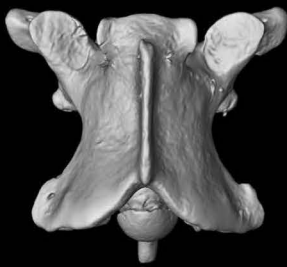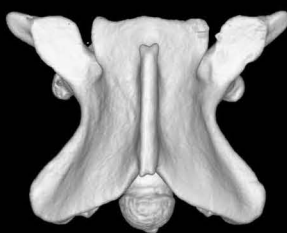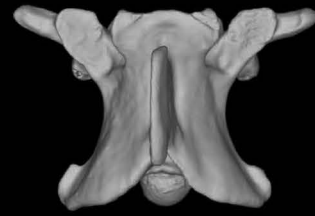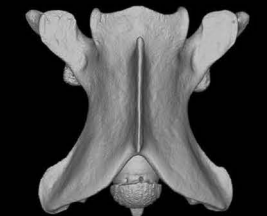

Ventral

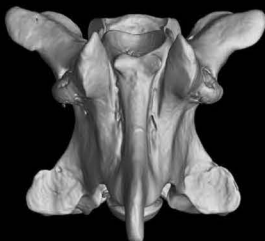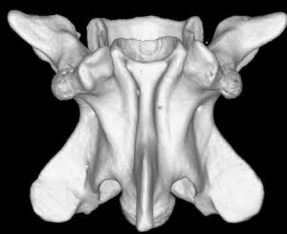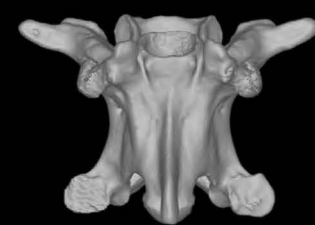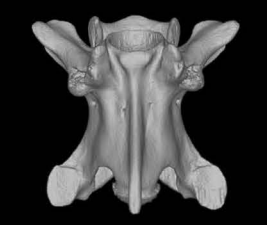



Fig. G

Sibynophiidae

Grayiidae

Calamariidae

*Scaphiodontophis annulatus*

*Grayia smithii*

*Grayia tholloni*

*Oreocalamus hanitschi*

Anterior

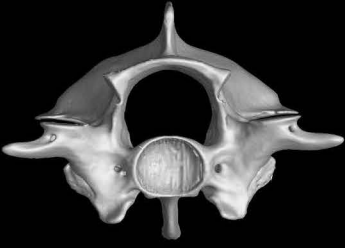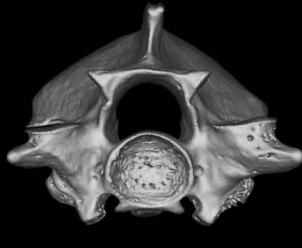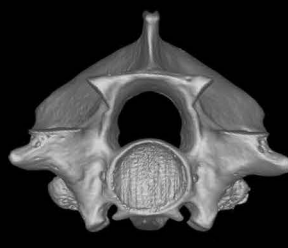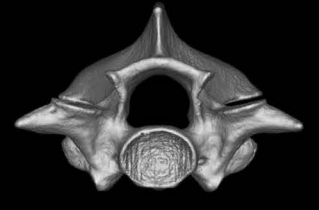

Posterior

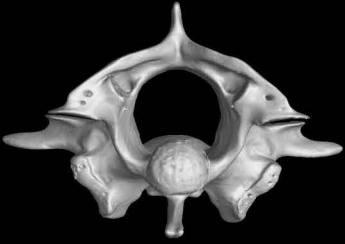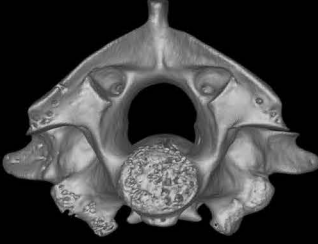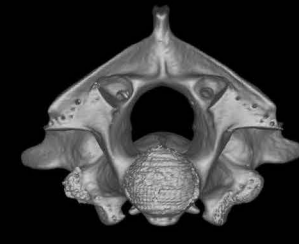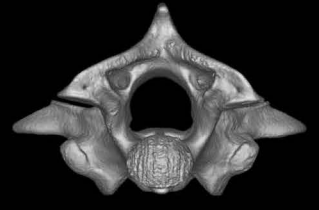

Lateral

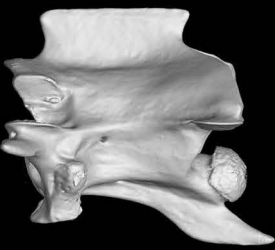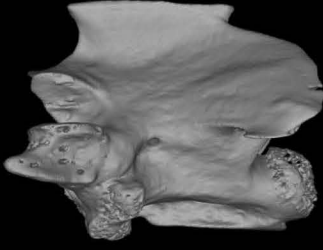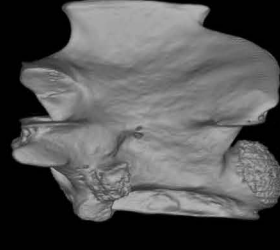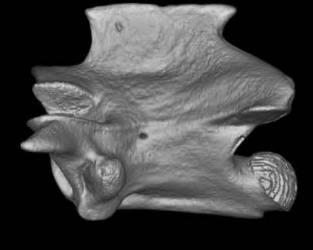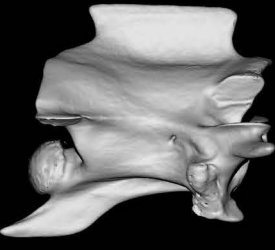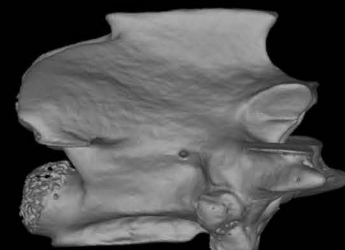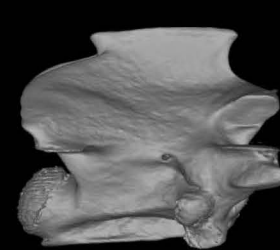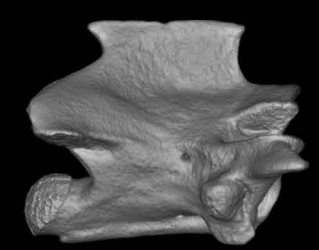

Dorsal

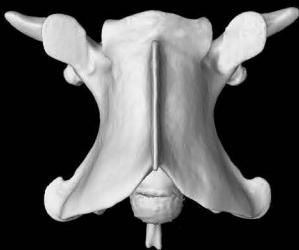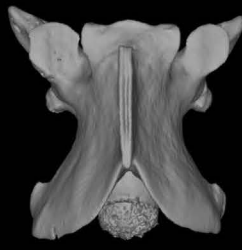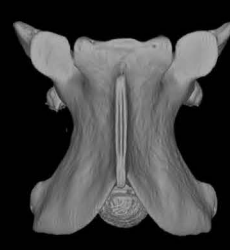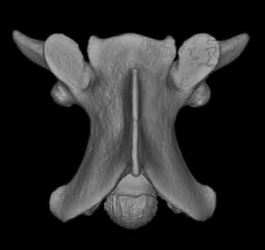

Ventral

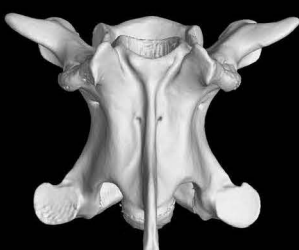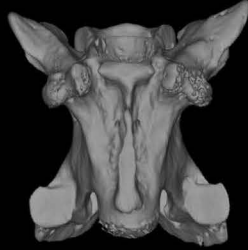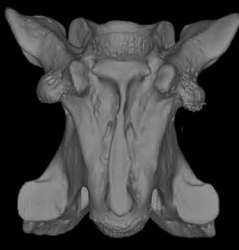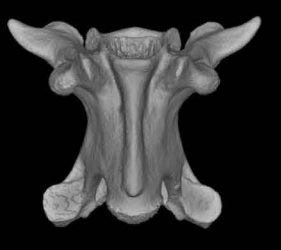



Fig. H

Colubridae

*Chironius bicarinatus*

*Spilotes pullatus*

*Oxybelis aeneus*

*Mastigodryas boddaerti*

Anterior

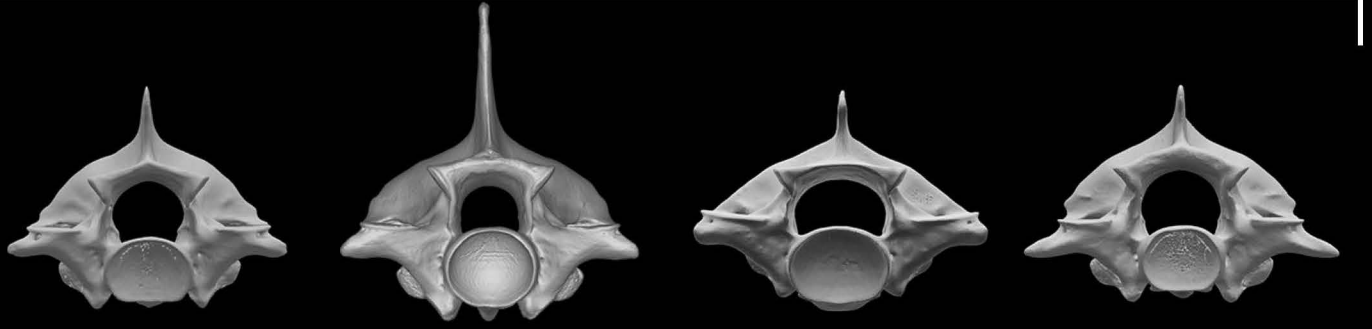

Posterior

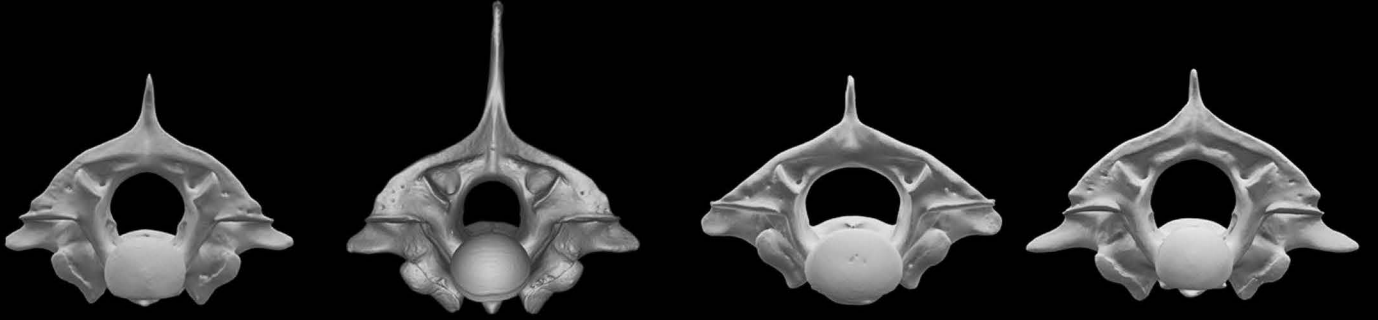

Lateral

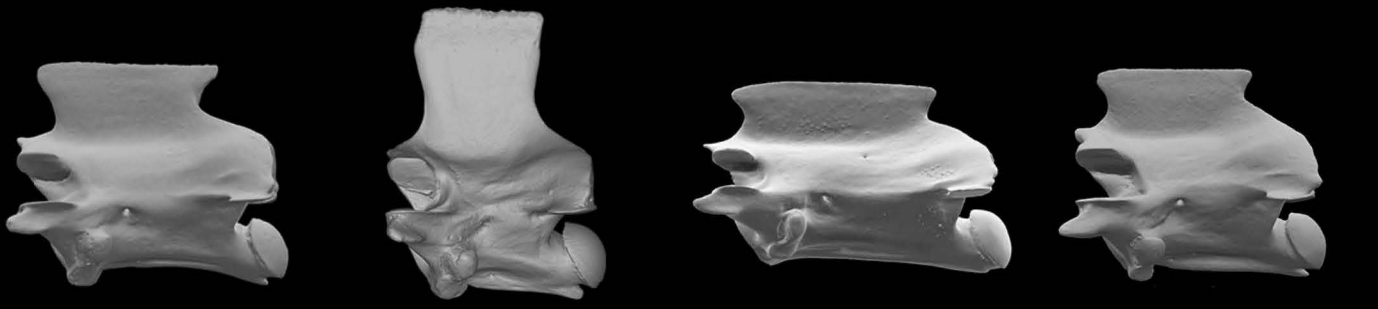

Dorsal

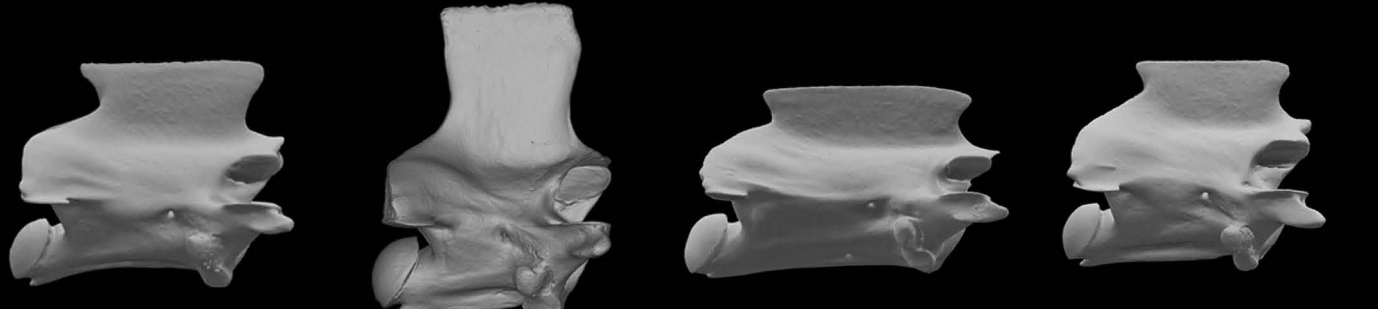

Ventral

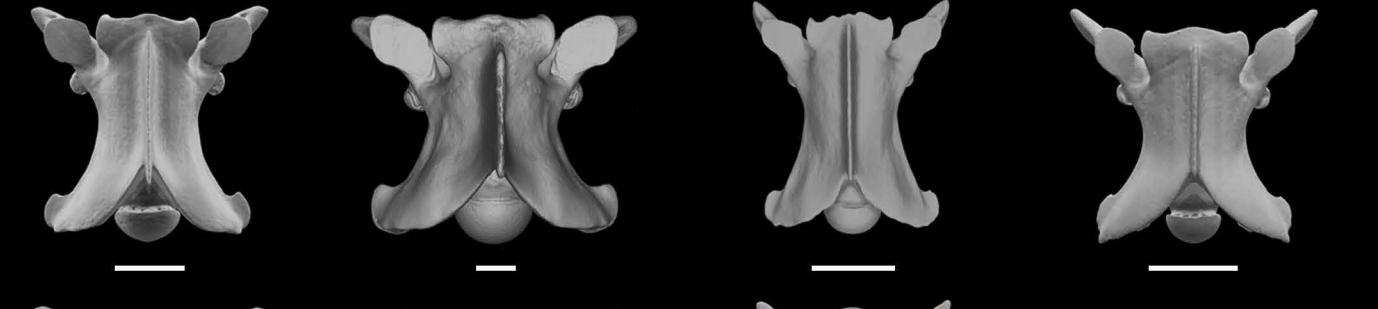

Fig. I

Colubridae

Dipsadidae

*Simophis rhinostoma*

*Heterodon platirhinos*

*Farancia abacura*

*Carphophis amoenus*

Anterior

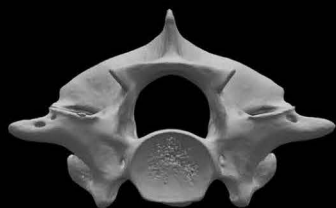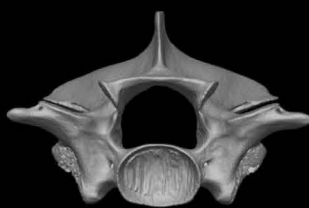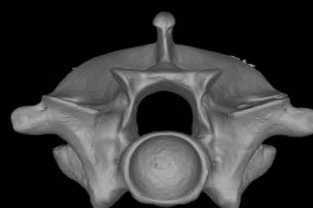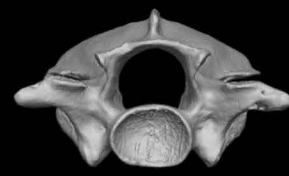

Posterior

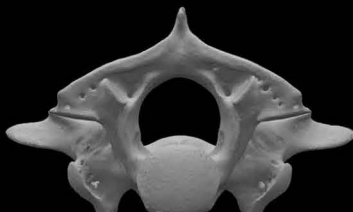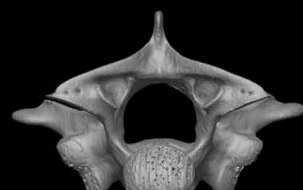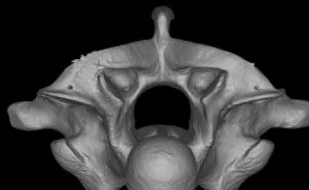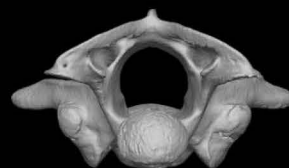

Lateral

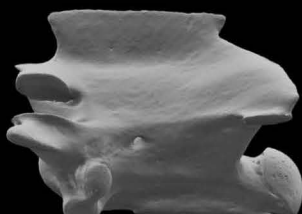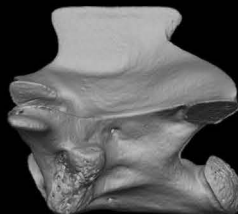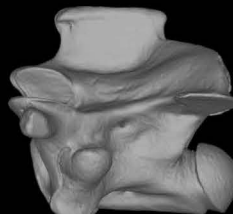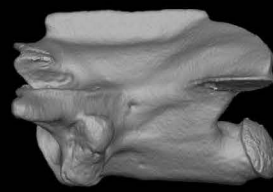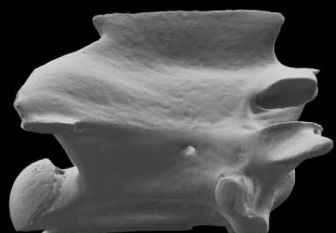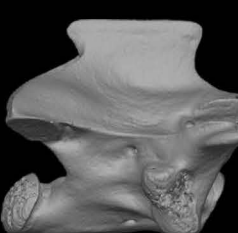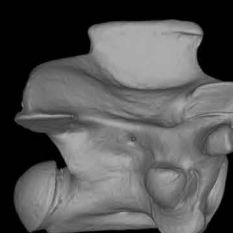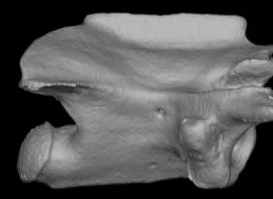

Dorsal

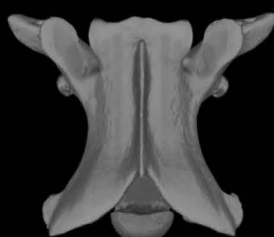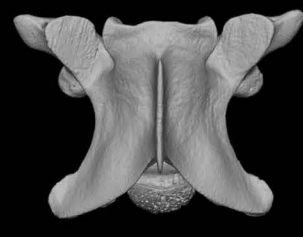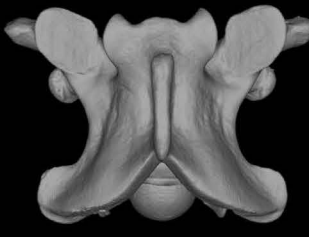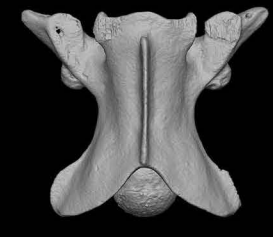

Ventral

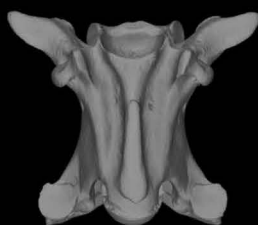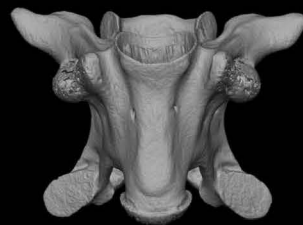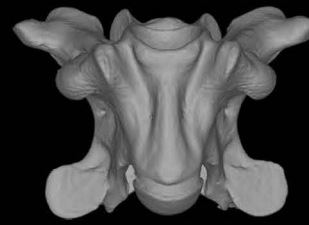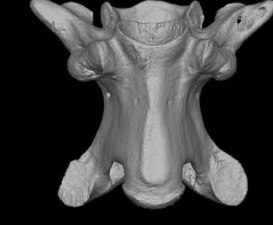

Fig. J

Dipsadidae

*Synophis lasallei*

*Nothopsis rugosus*

*Dipsas indica*

*Atractus serranus*

Anterior

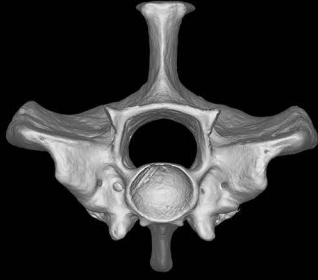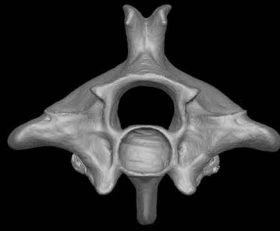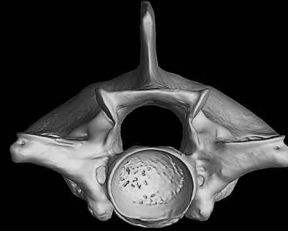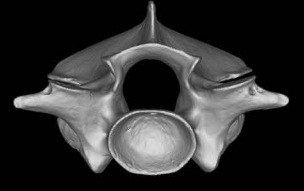

Posterior

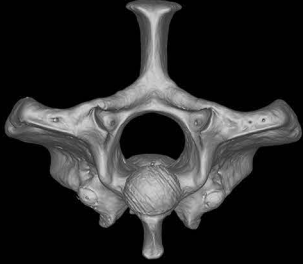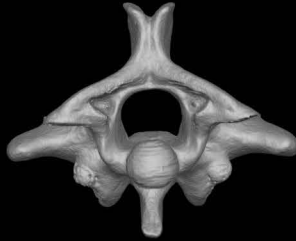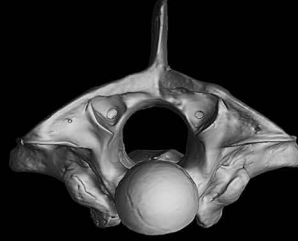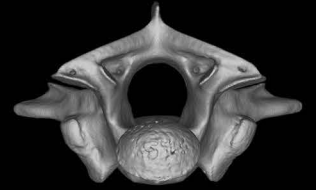

Lateral

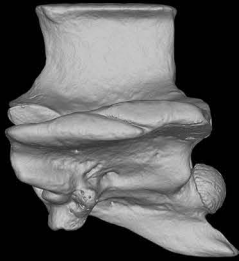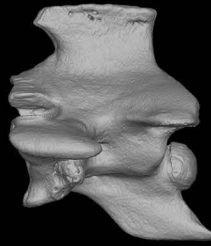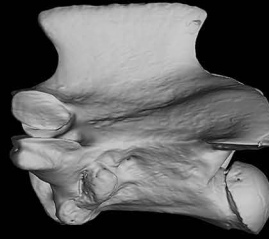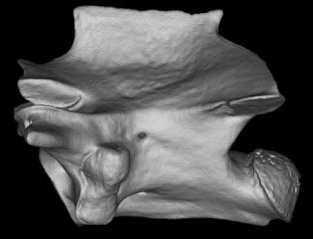

Dorsal

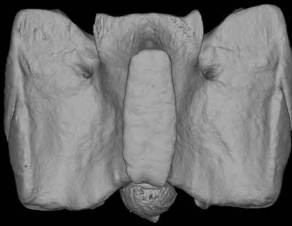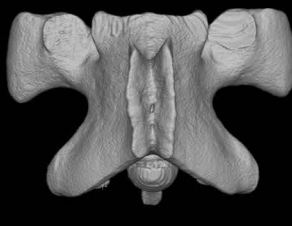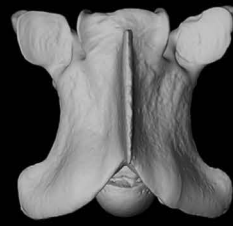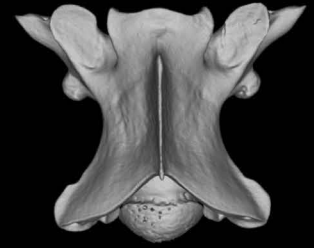

Ventral

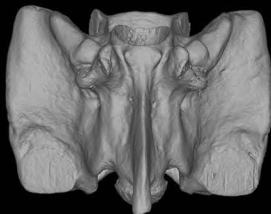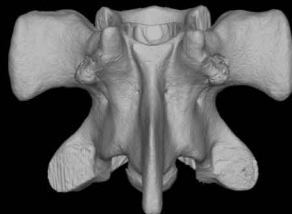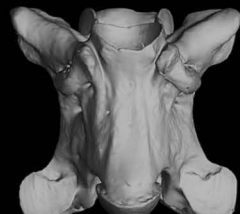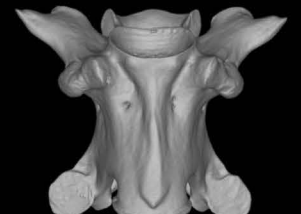



Fig. K

Dipsadidae

*Boiruna maculata*

*Helicops angulatus*

*Philodryas nattereri*

*Oxyrhopus clathratus*

Anterior

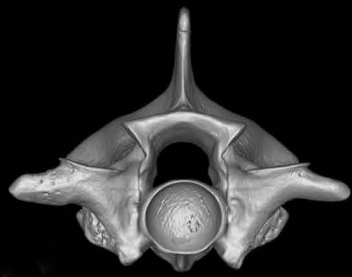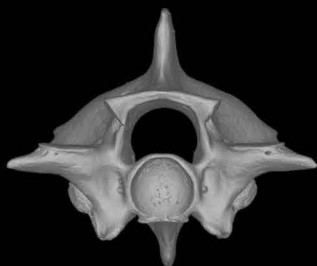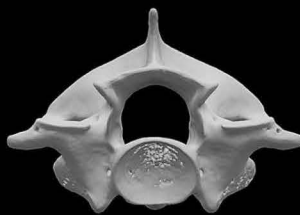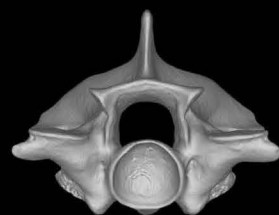

Posterior

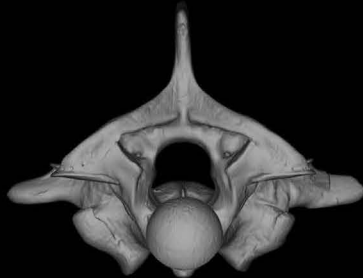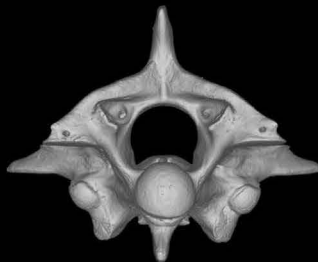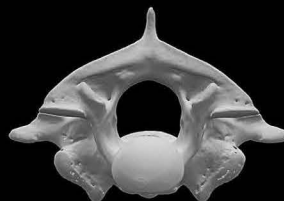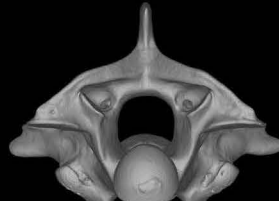

Lateral

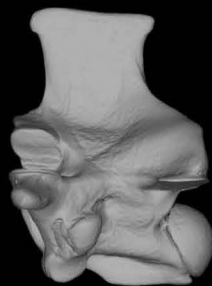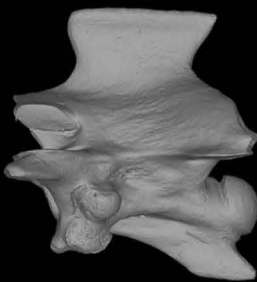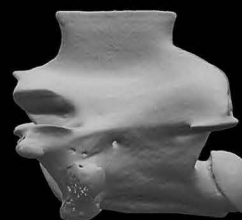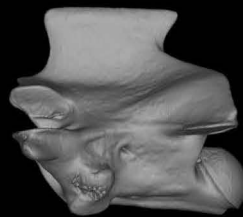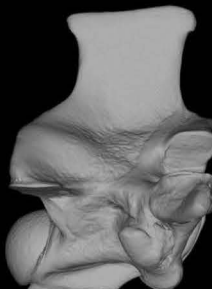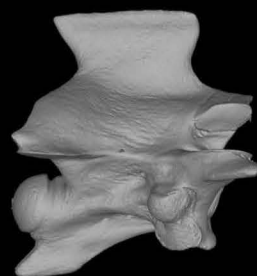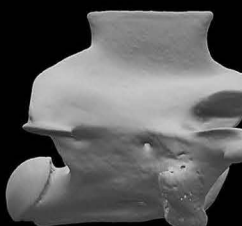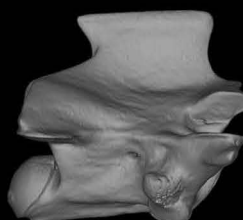

Dorsal

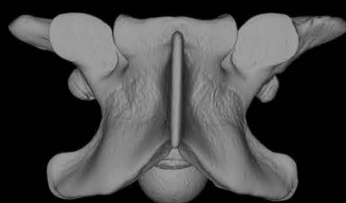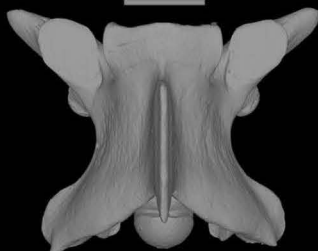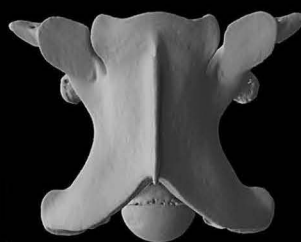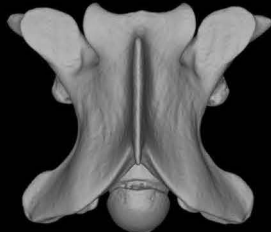

Ventral

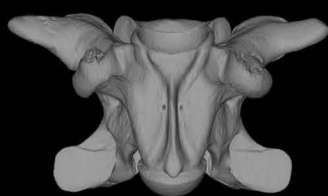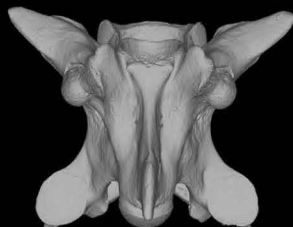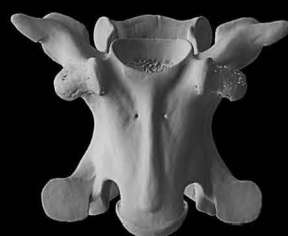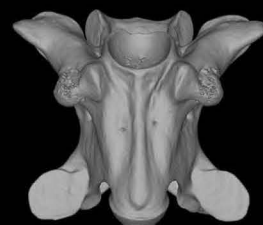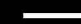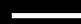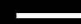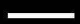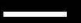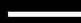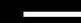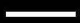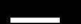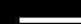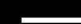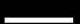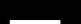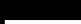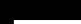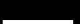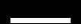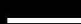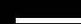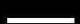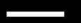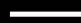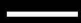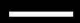

Supplement: pone.0216148.s016.pdf [file pone.0216148.s016.pdf]
