# Supplementary material for: Large-scale molecular phylogeny, morphology, divergence-time estimation, and the fossil record of advanced caenophidian snakes (Squamata: Serpentes)
Source: PubMed Central journal article supplement (PMC6512042; doi:10.1371/journal.pone.0216148), 2019-05-10

## **S3 Appendix**

**Fig. A**

**Acrochordidae**

*Acrochordus javanicus*

**Xenodermidae**

*Xenodermus javanicus*

Sulcate

Asulcate

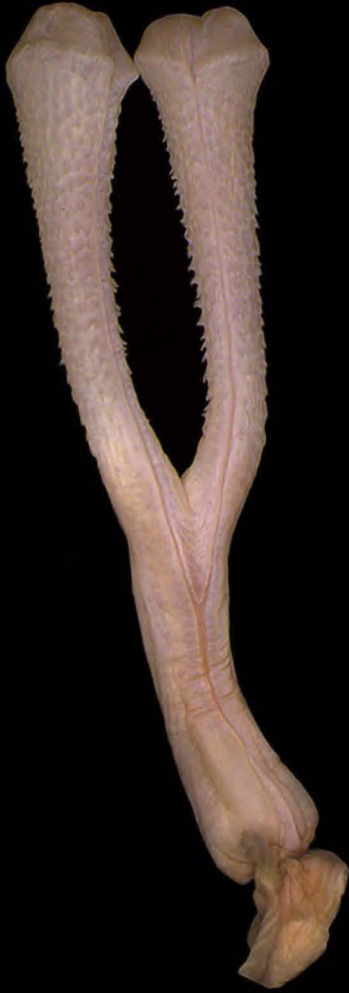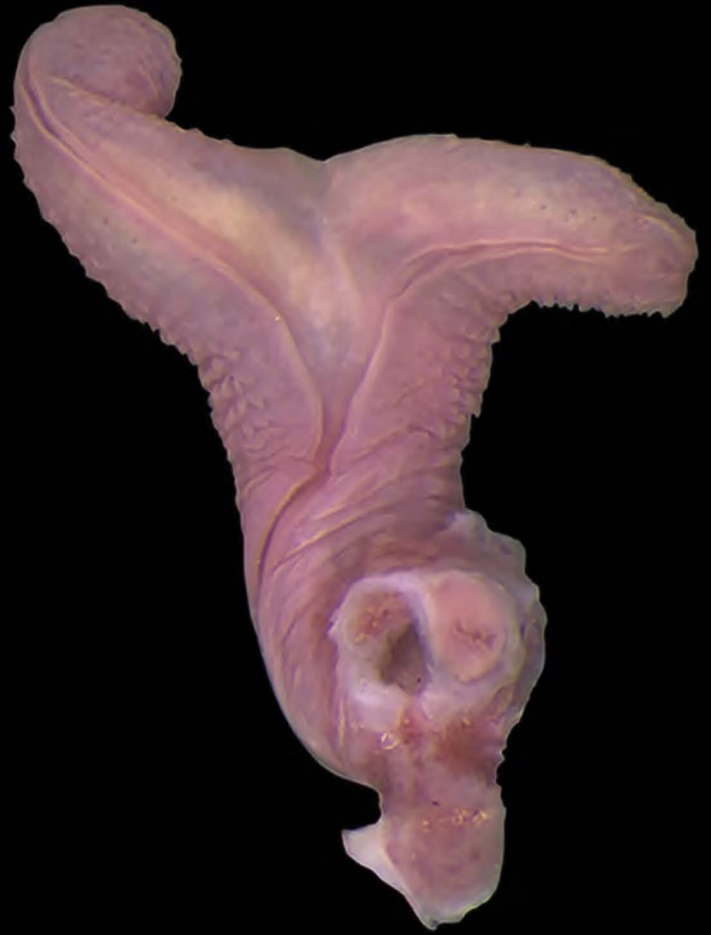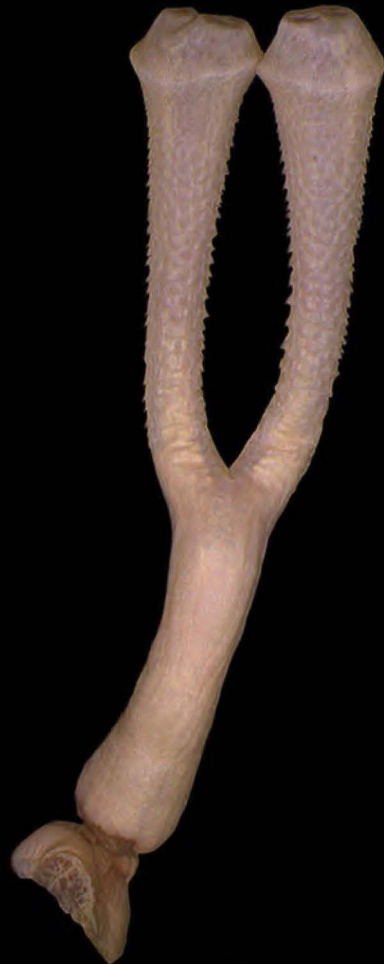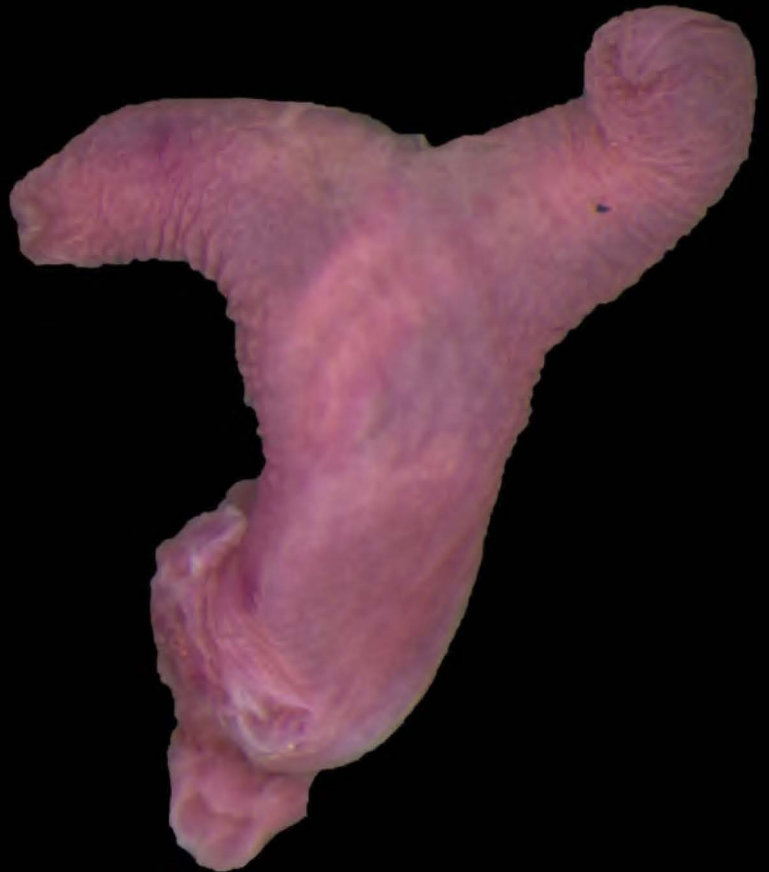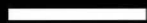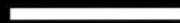

Fig. B

Xenodermidae

Pareidae

*Achalinus rufescens*

*Fimbrios klossi*

*Pareas monticola*

Sulcate

Asulcate

Apical

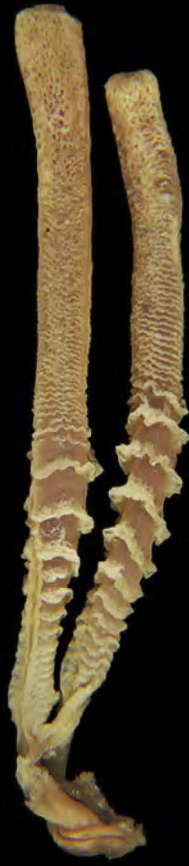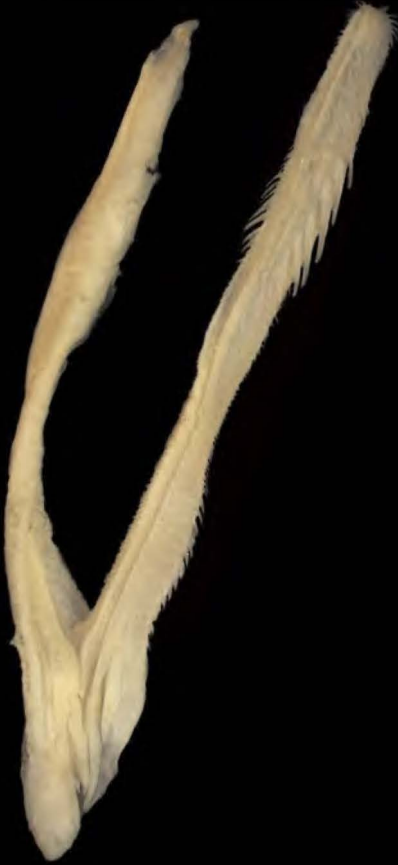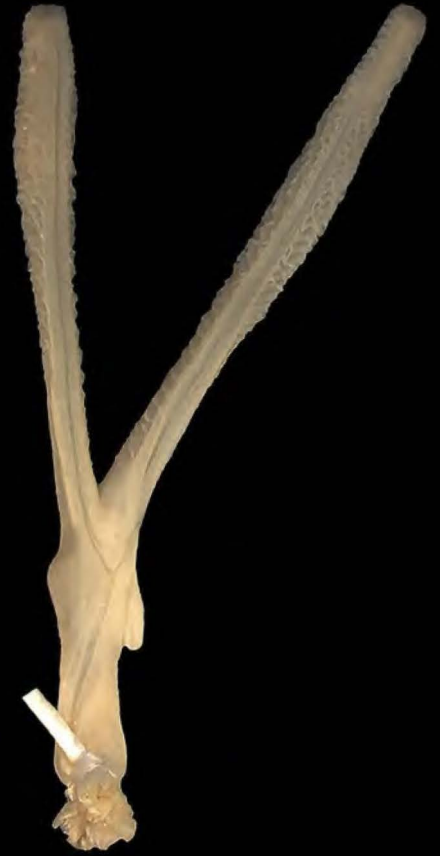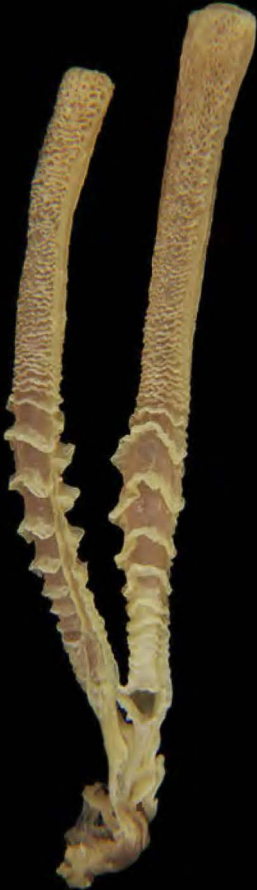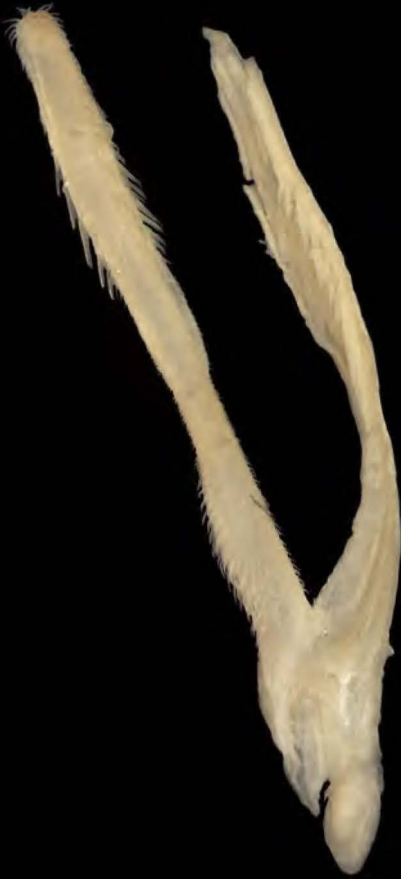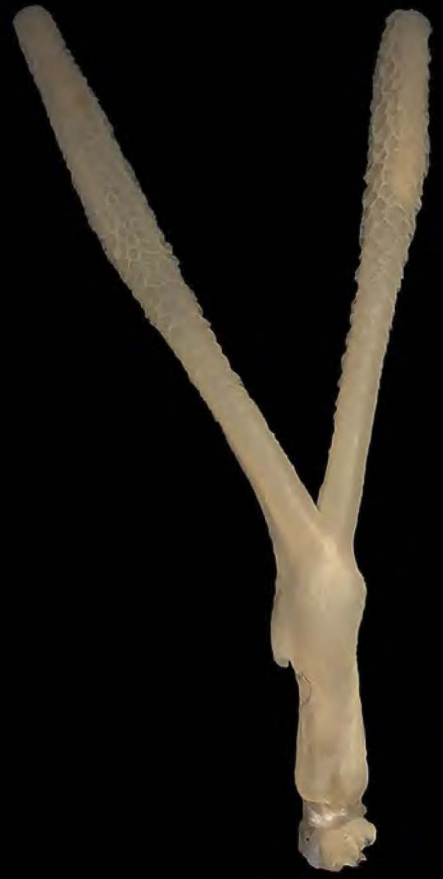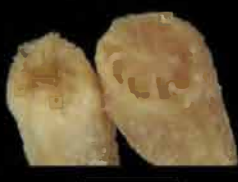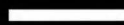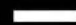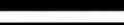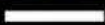

Fig. C

Pareidae

*Asthenodipsas malaccamus*

*Aplopeltura boa*

Sulcate

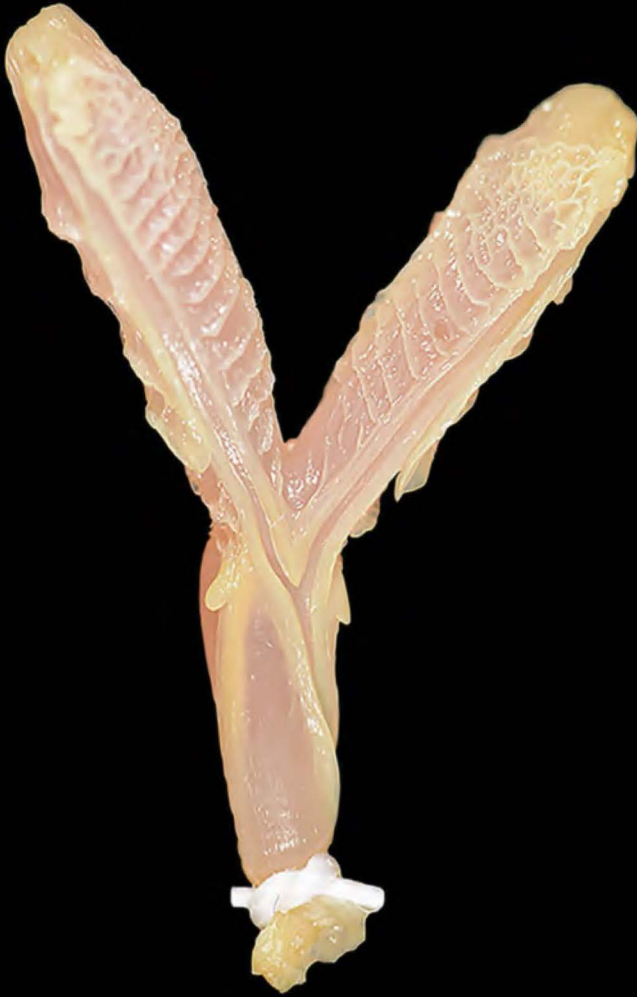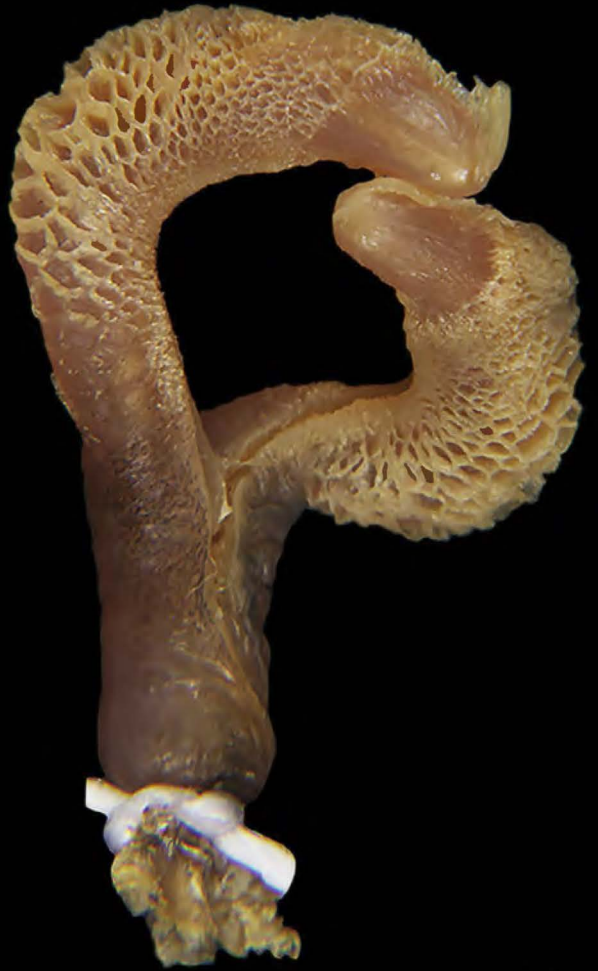

Asulcate

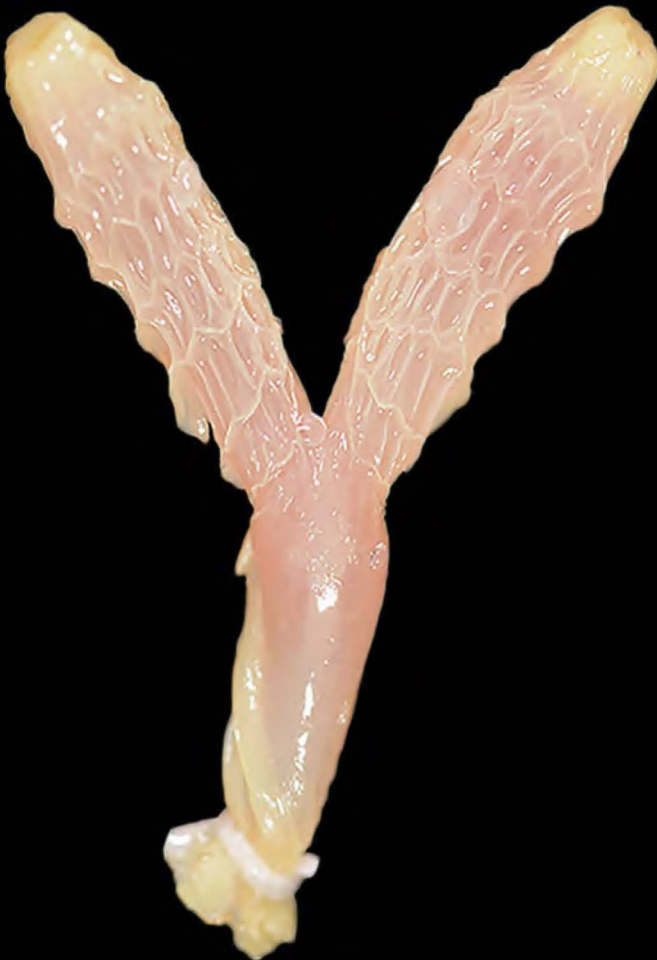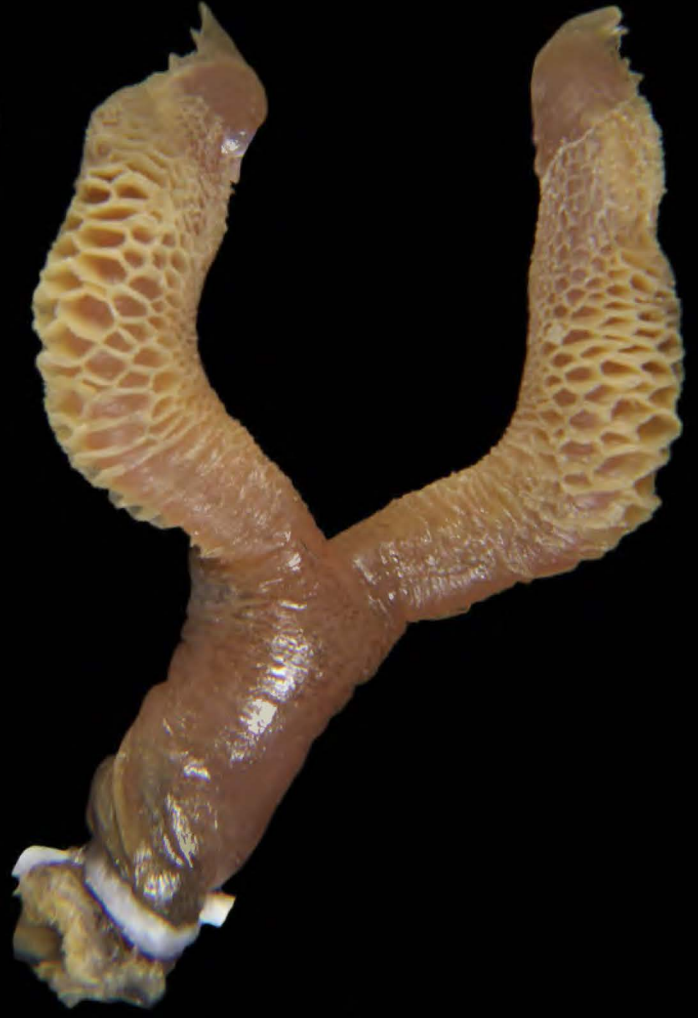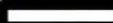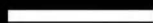

Fig. D

Xylophiidae

*Xylophis perroteti*

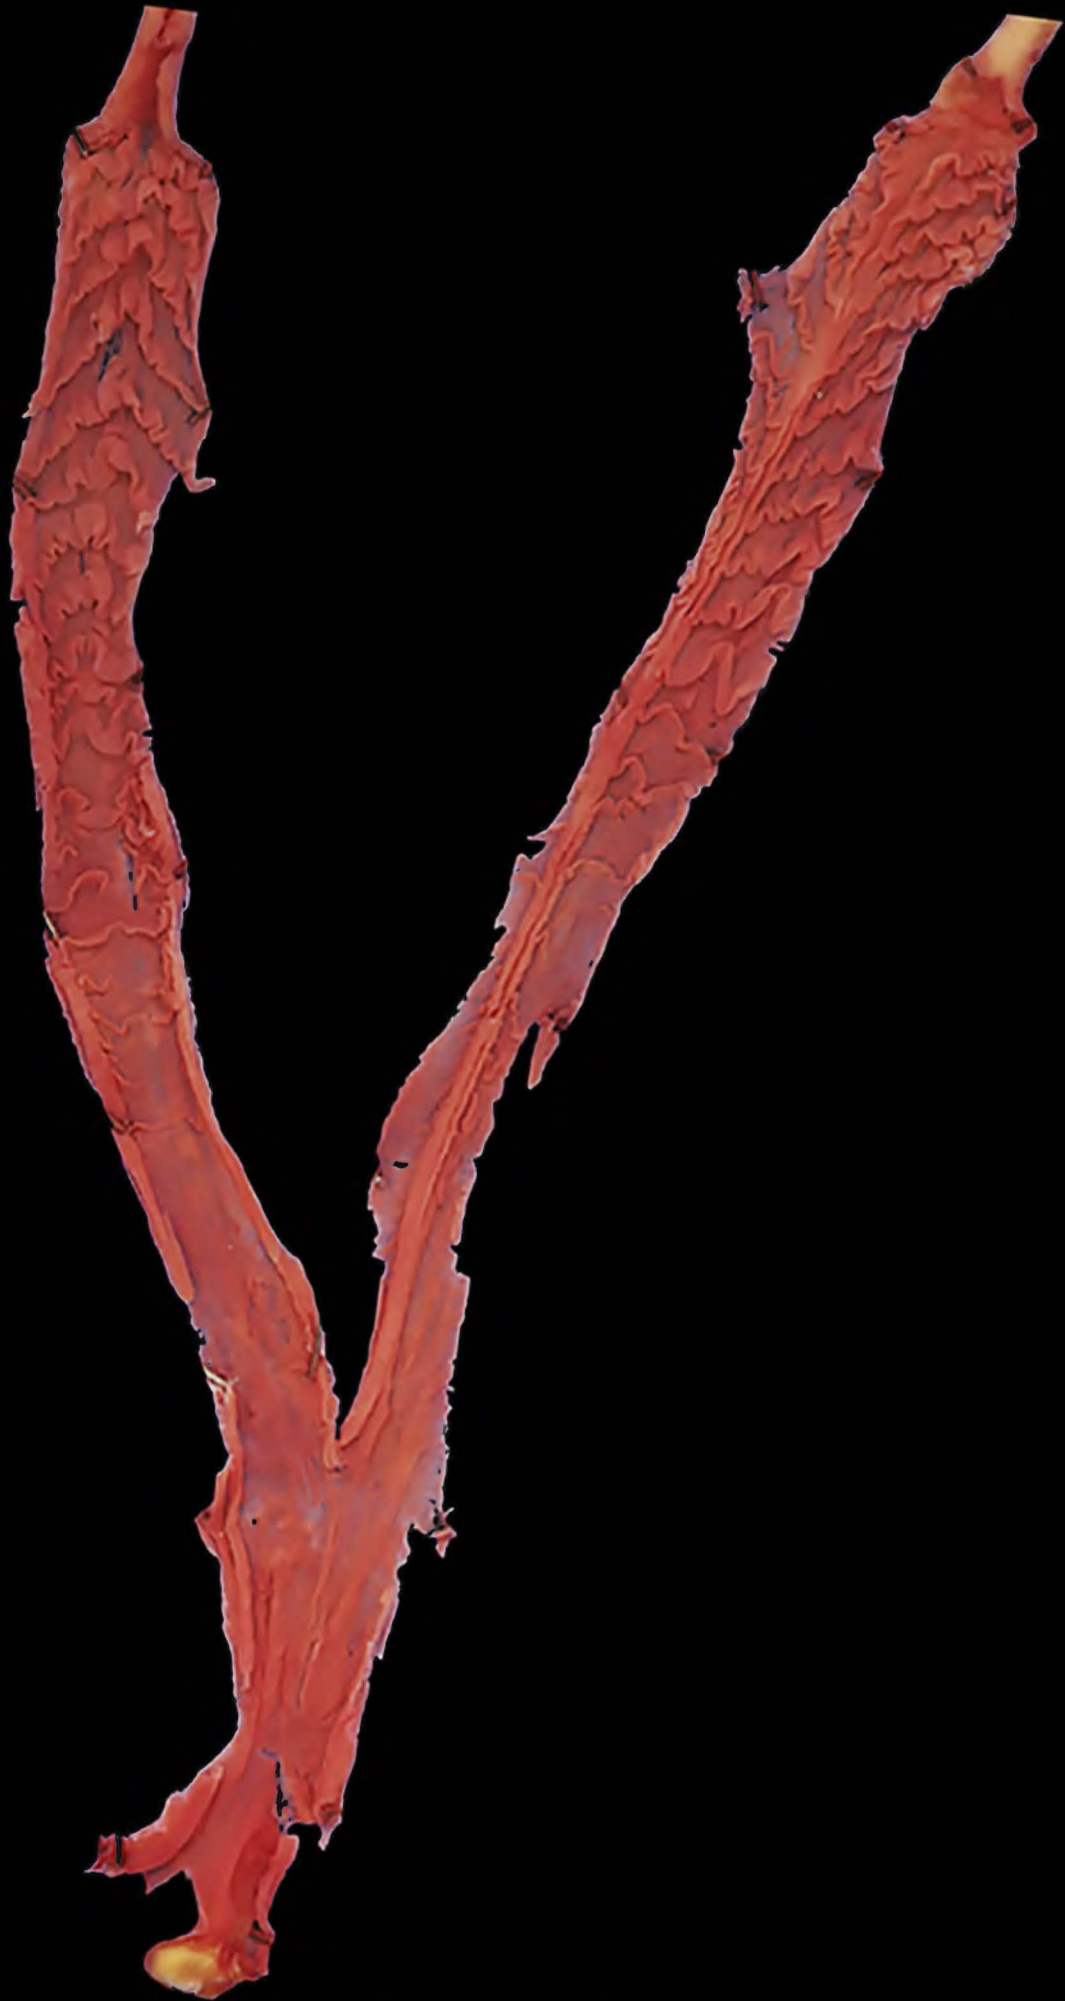

**Fig. E**

**Viperidae**

*Porthidium nasutum*

*Vipera ammodytes*

Sulcate

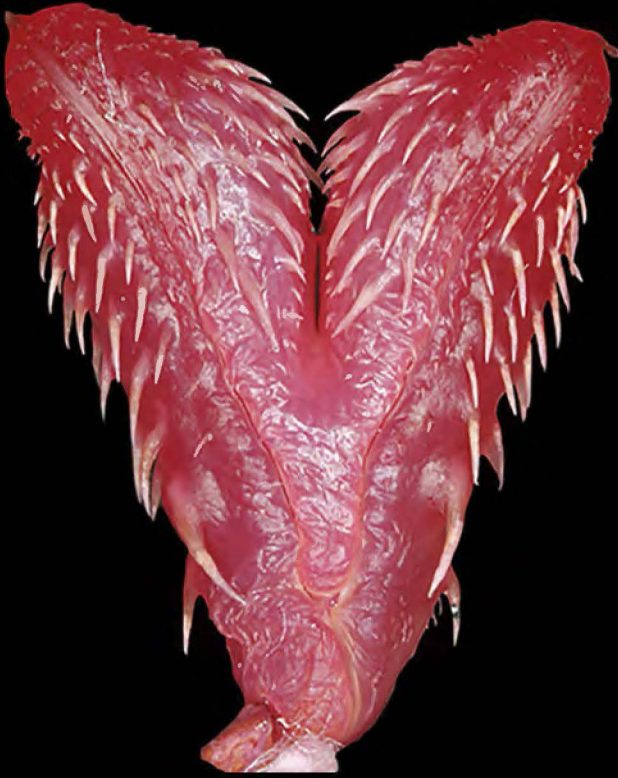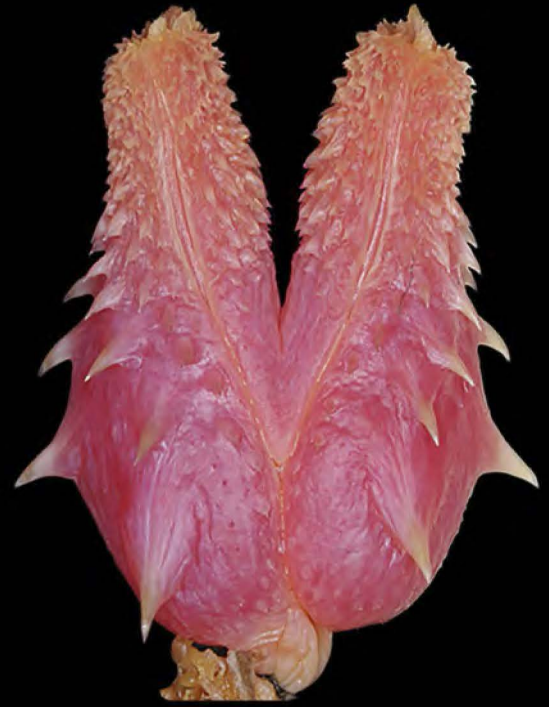

Asulcate

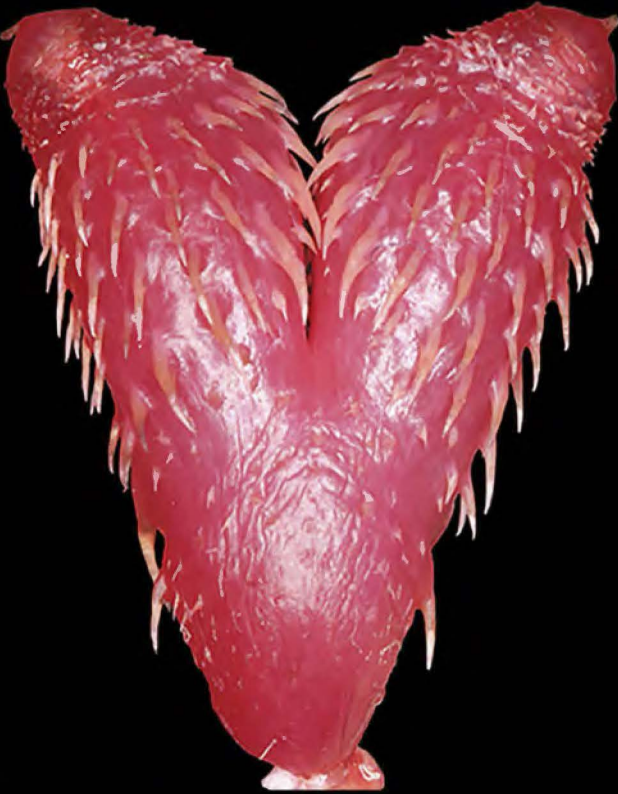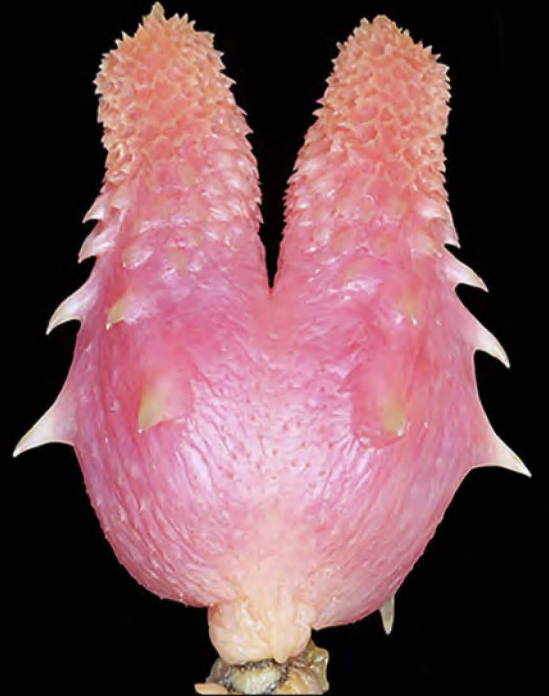

Apical

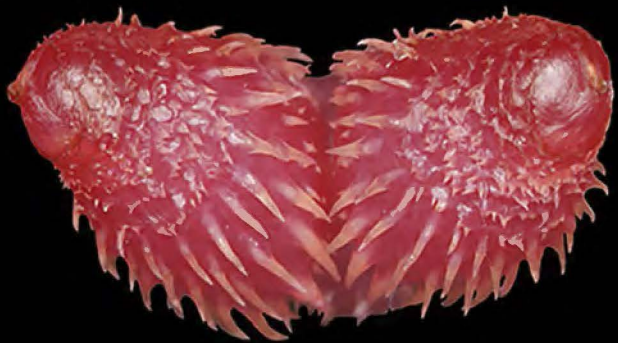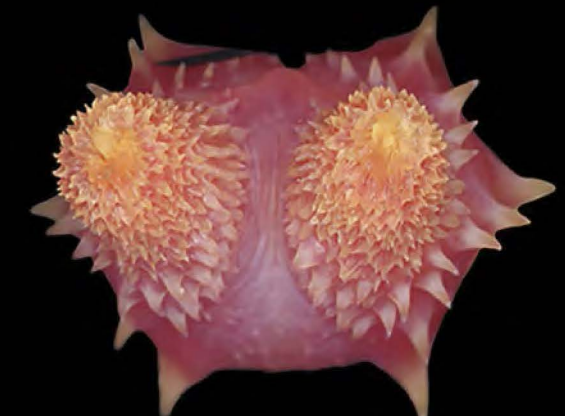

Fig. F

Viperidae

*Bothrops neuwiedi*

*Causus bilineatus*

Sulcate

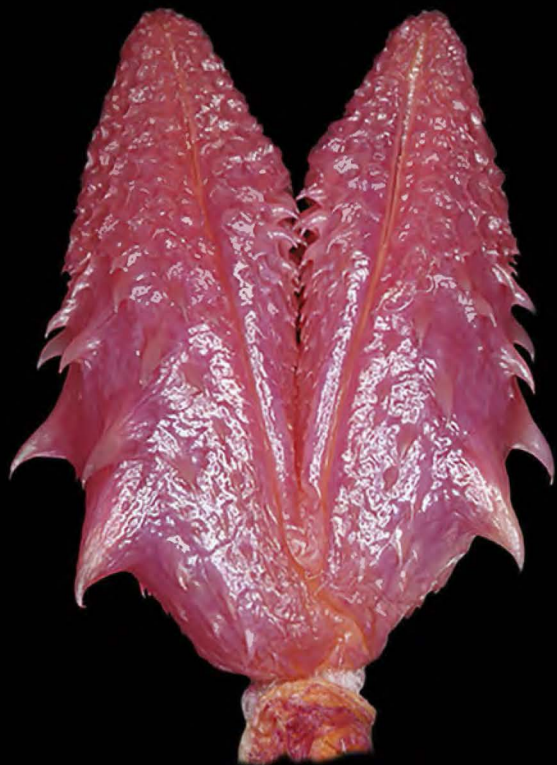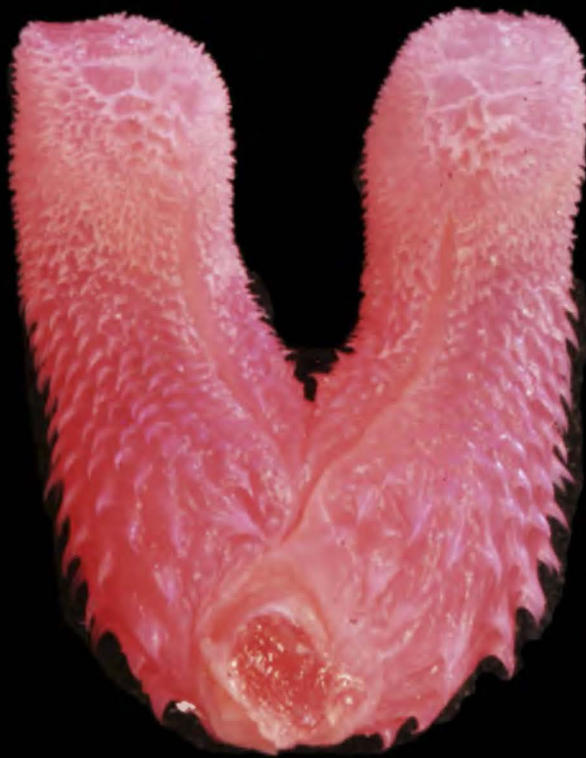

Asulcate

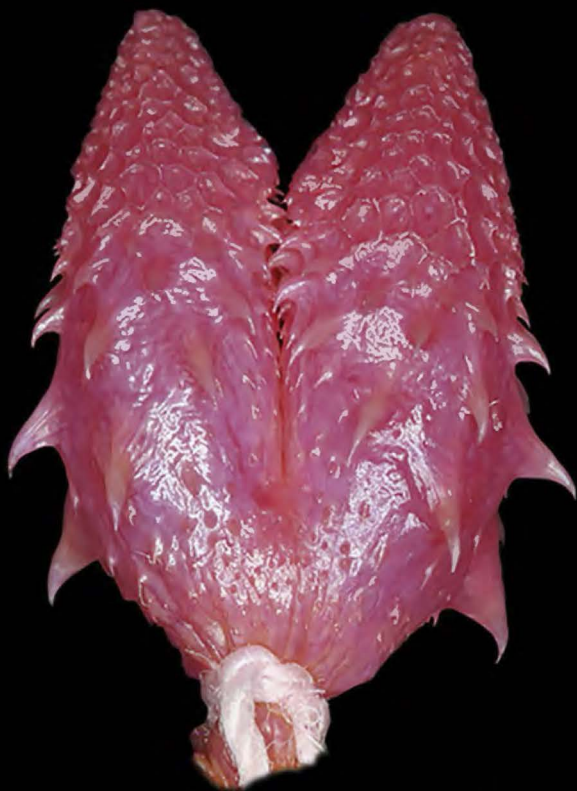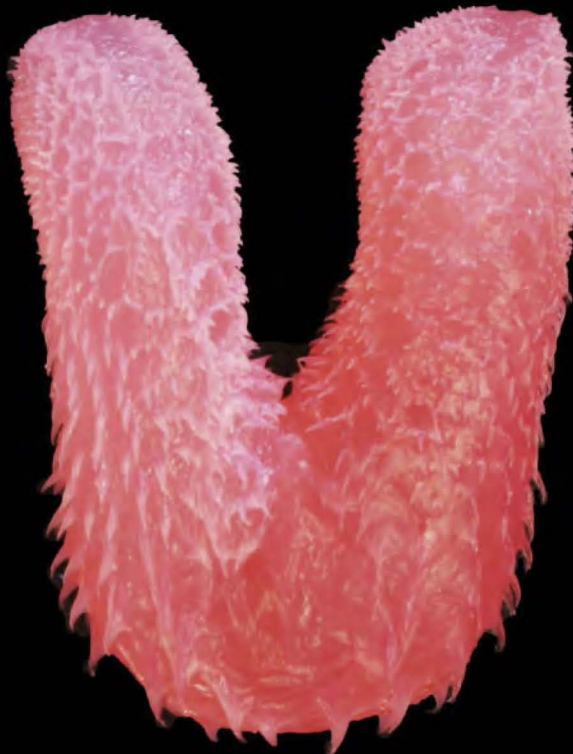

Apical

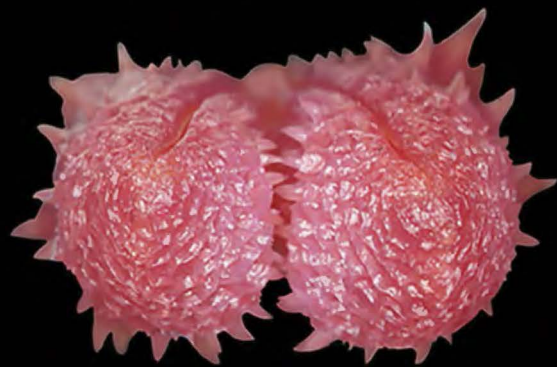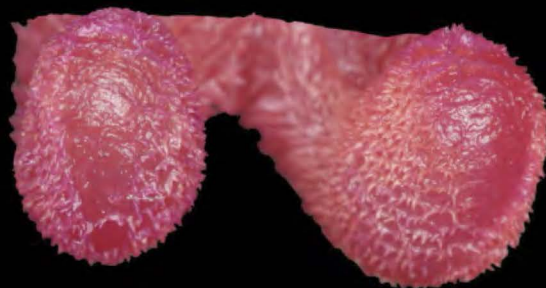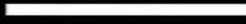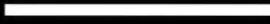

Fig. G

Homalopsidae

*Homalopsis buccata*

*Brachyorrhos albus*

Sulcate

Asulcate

Apical

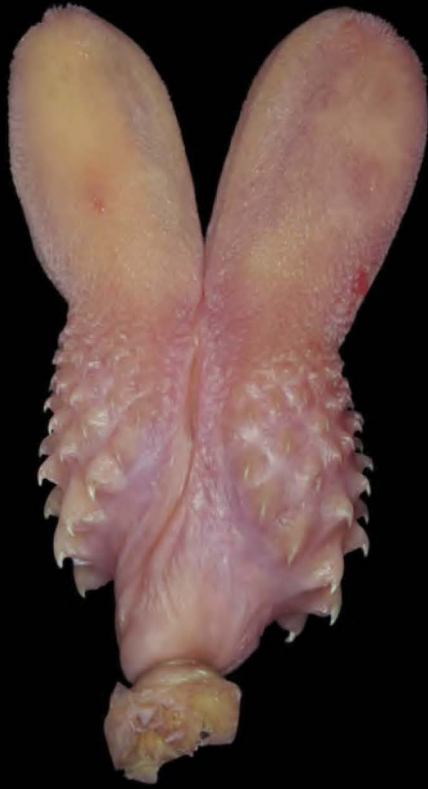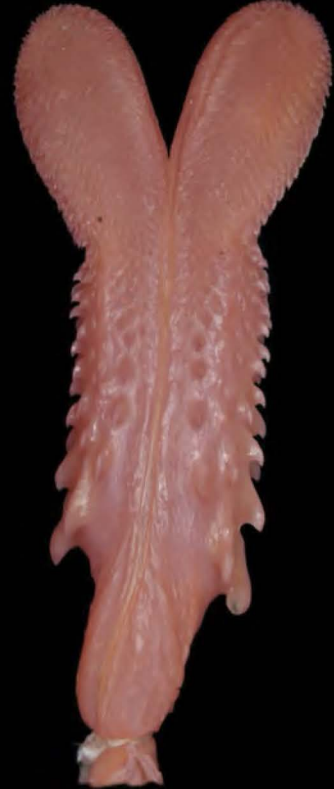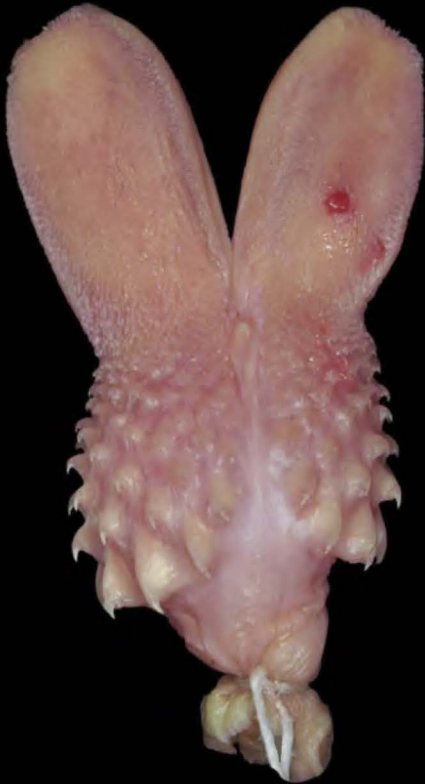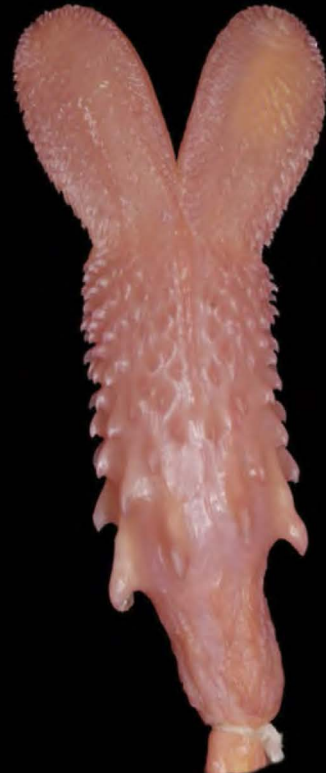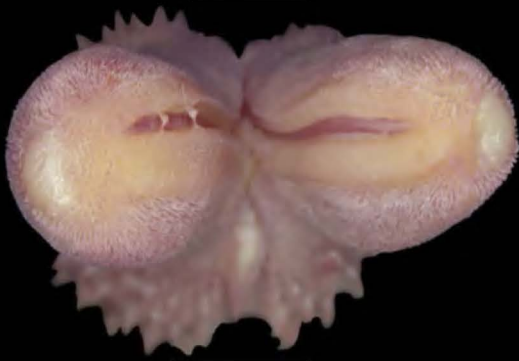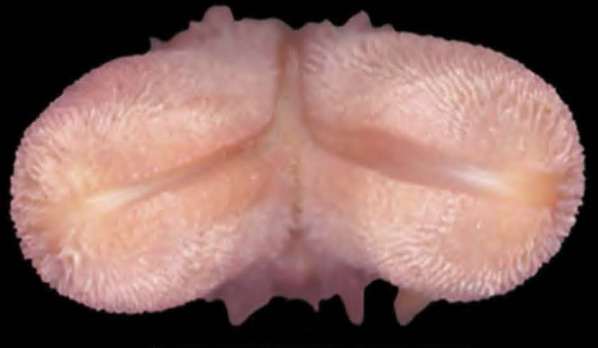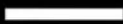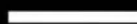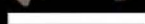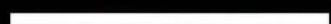



Fig. H

Homalopsidae

*Fordonia leucobalia*

*Bitia hydroides*

Sulcate

Asulcate

Apical

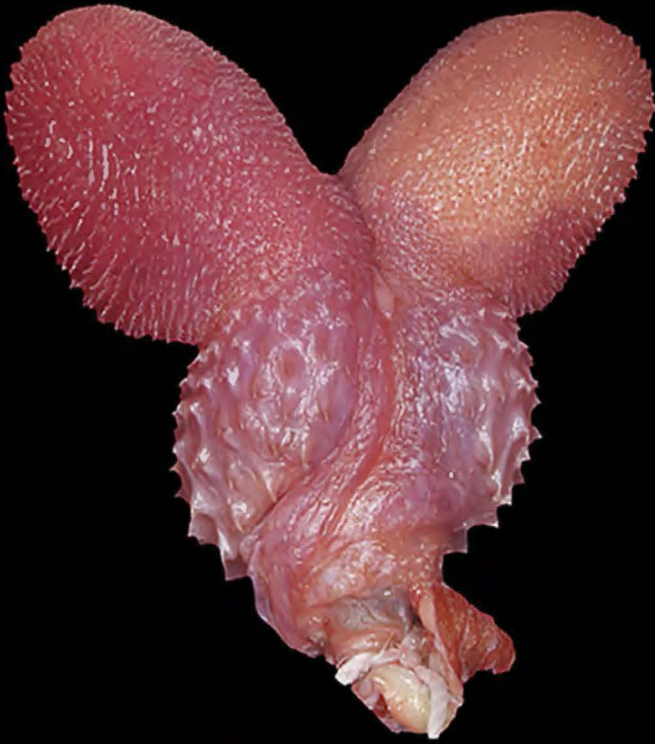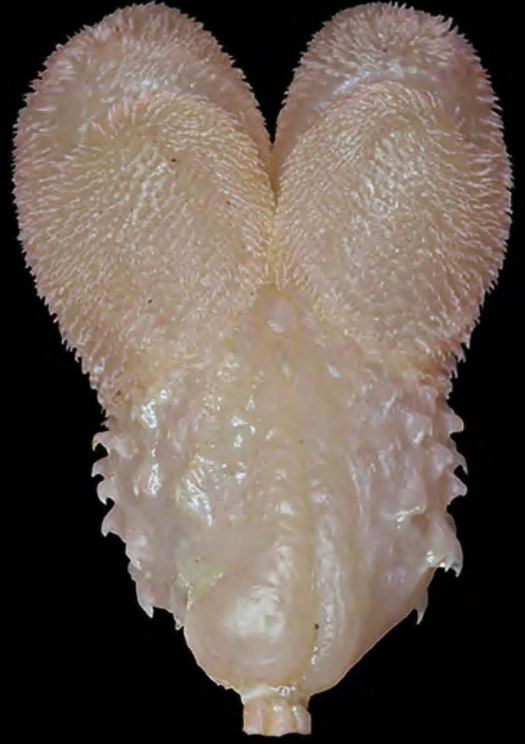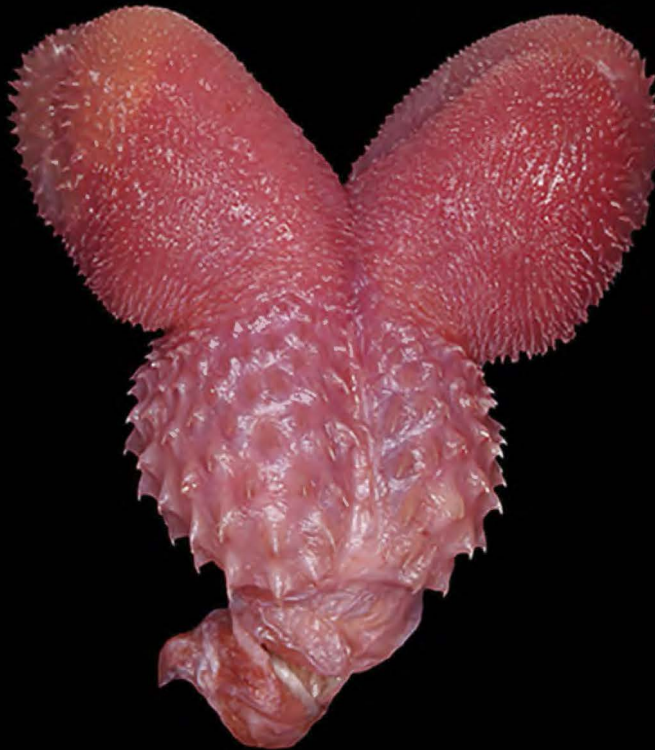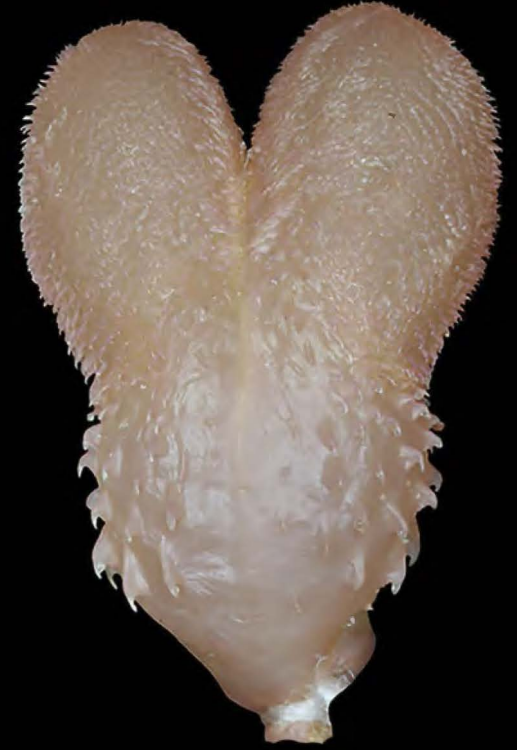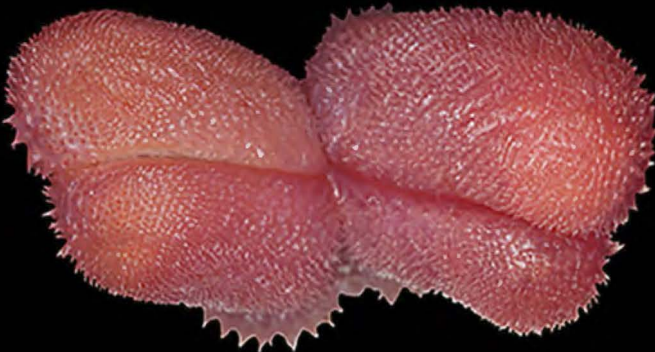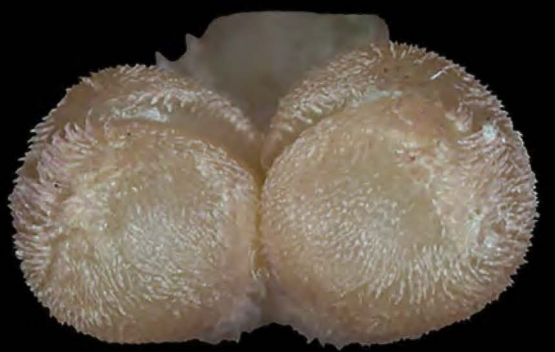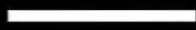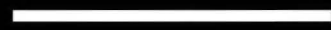

**Fig. 1 Homalopsidae**

*Erpeton tentaculatum*

**Psammophiidae**

*Mimophis mahfalensis*

**Atractaspididae**

*Polemon christyi*

Sulcate

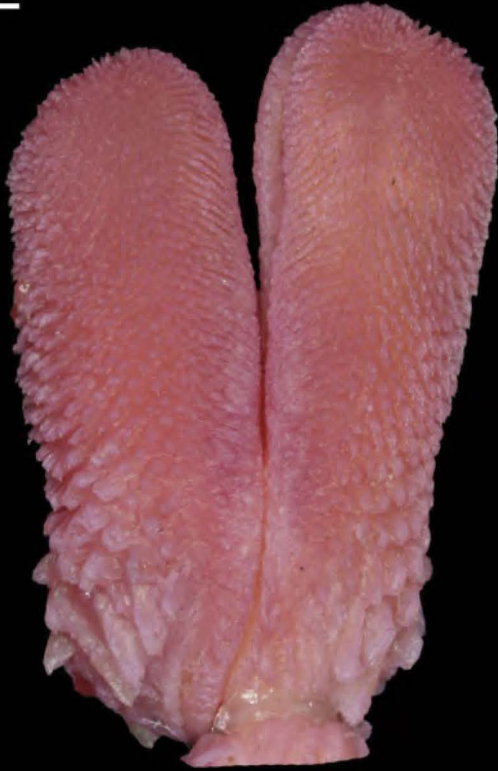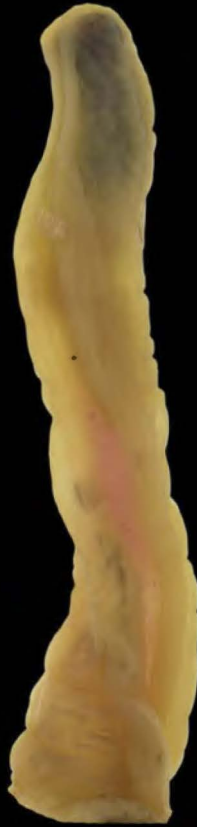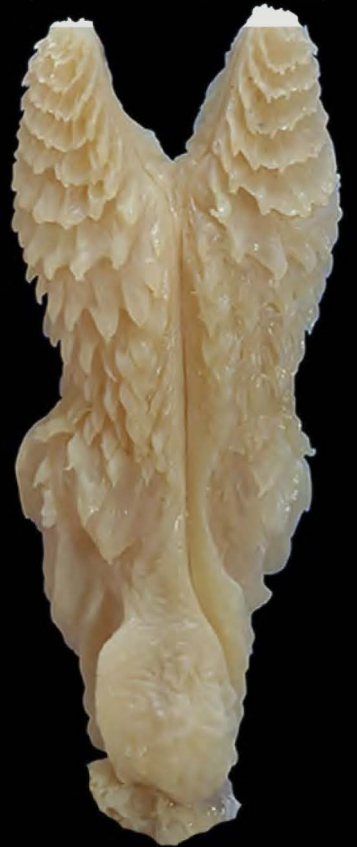

Asulcate

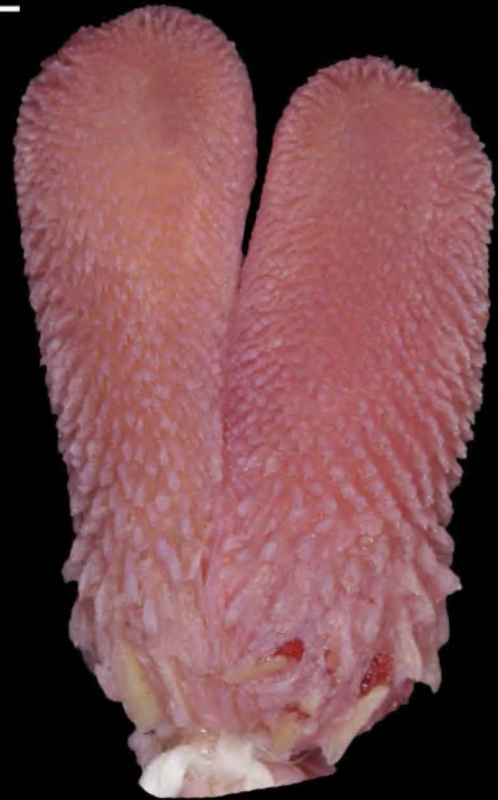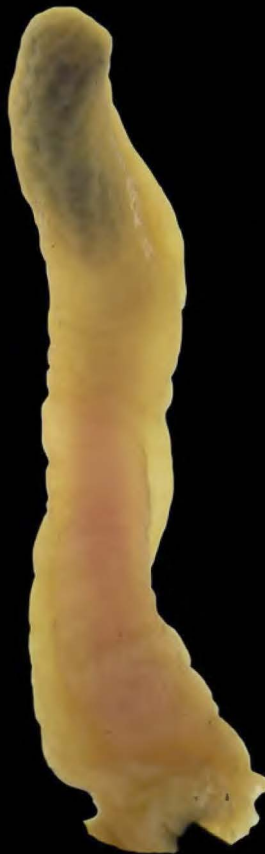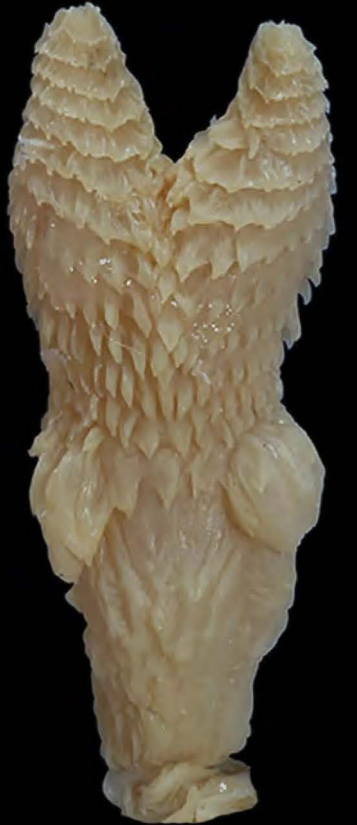

Apical

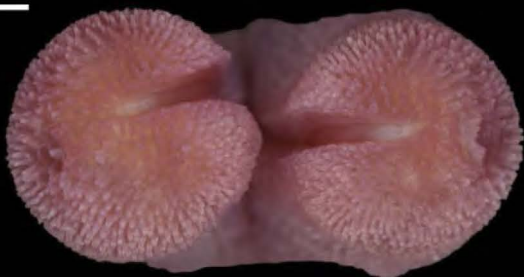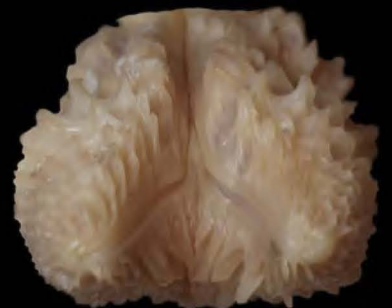

Fig. J

Atractaspididae

*Atractaspis fallax*

*Macrelaps microlepidotus*

Sulcate

Asulcate

Apical

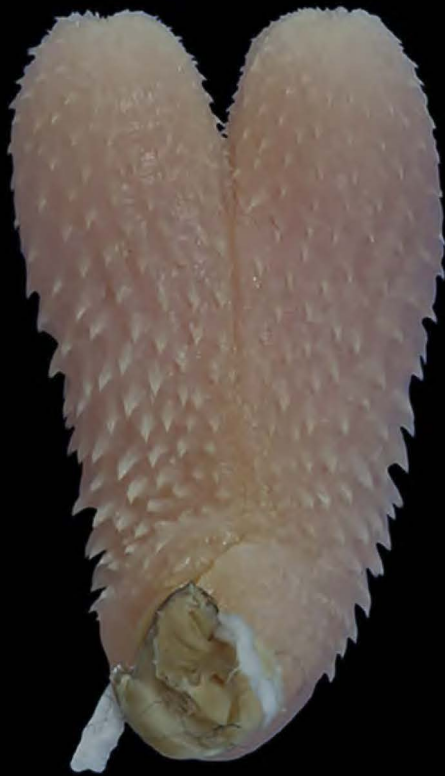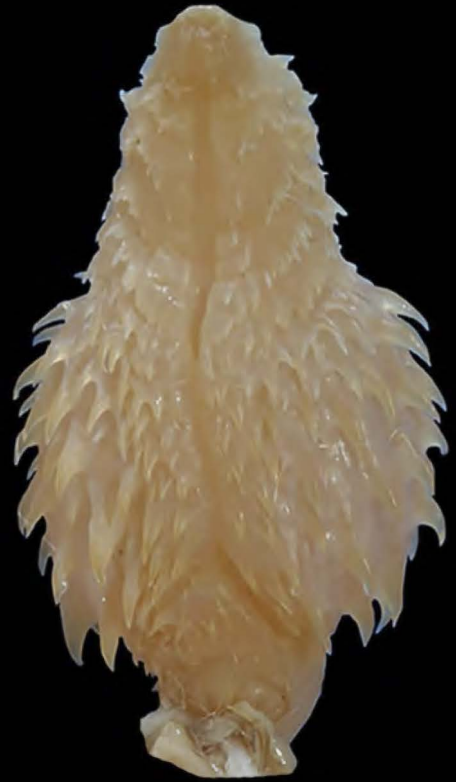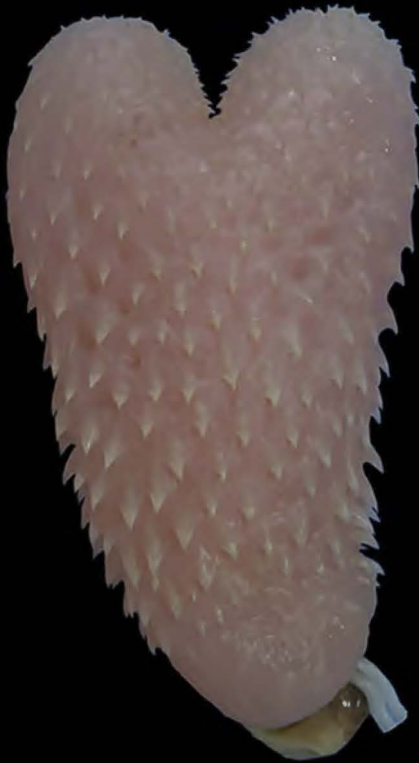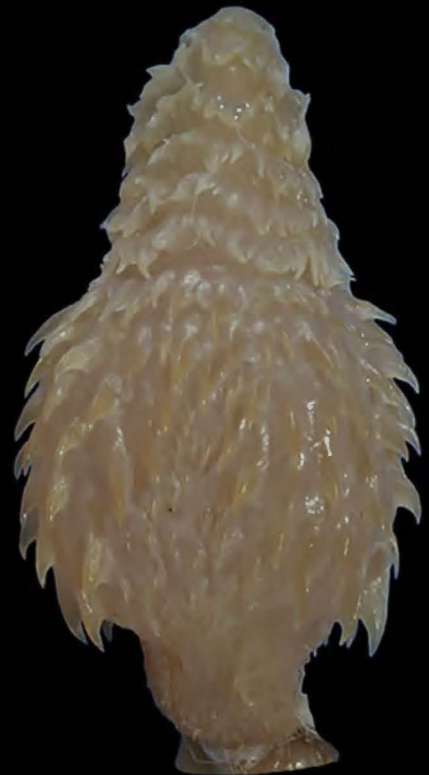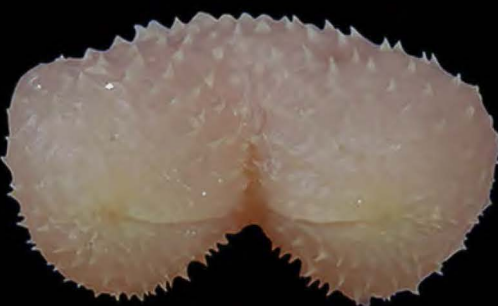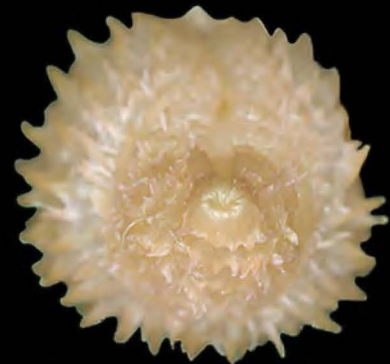

Fig. K

Cyclocoridae

*Cyclocorus lineatus*

*Oxyrhabdion modestum*

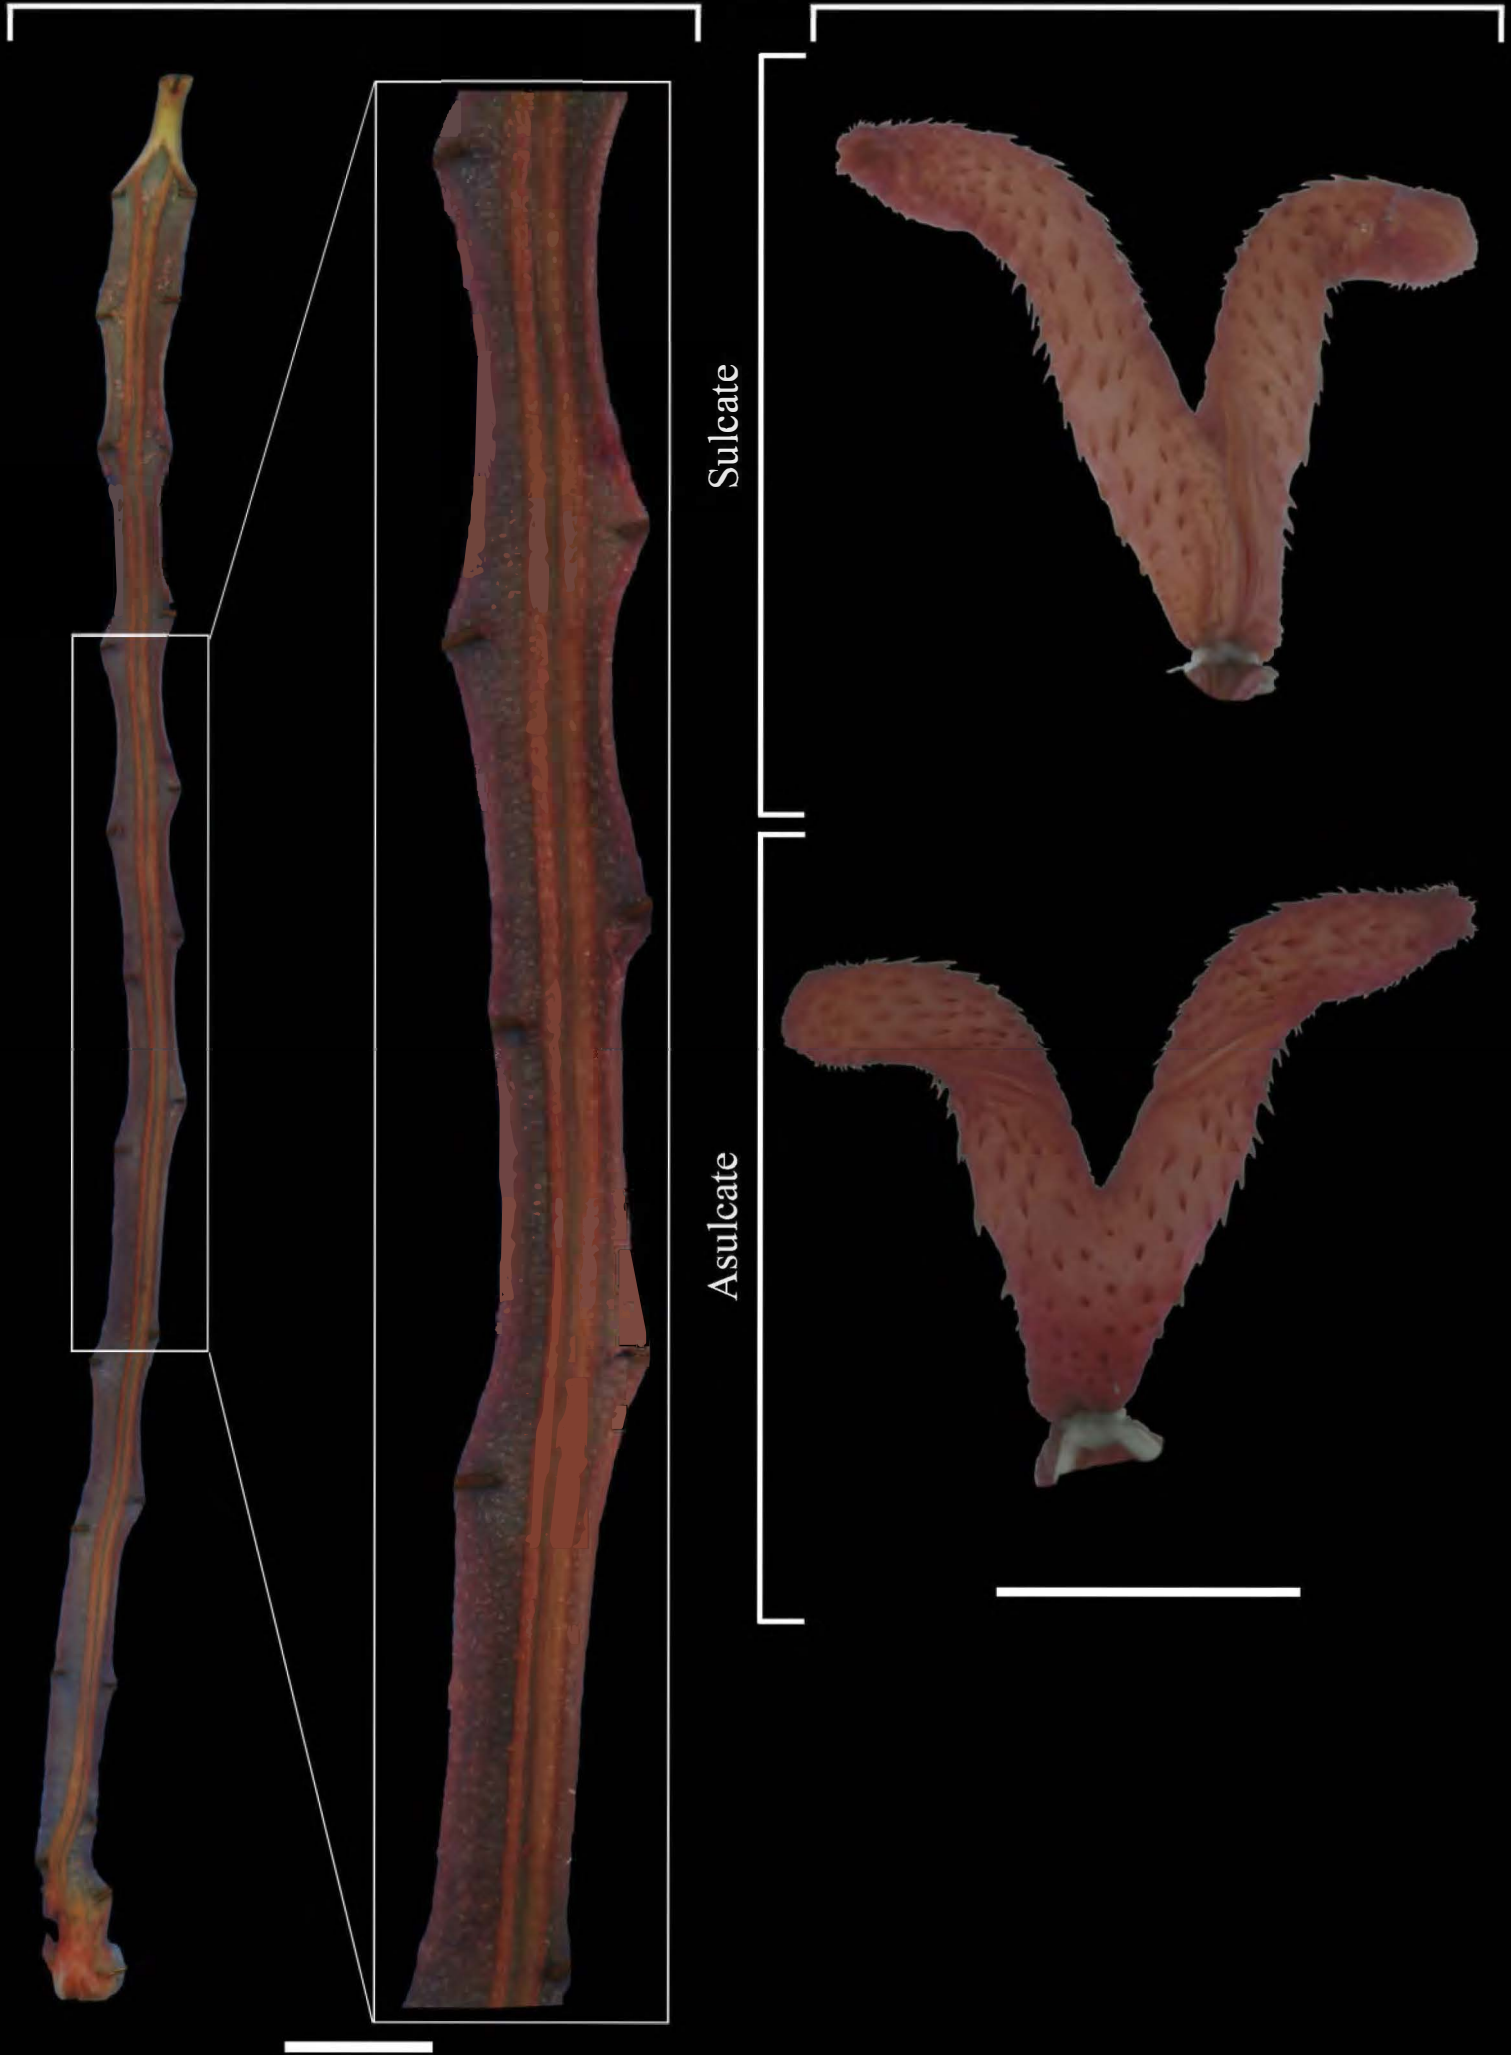

Sulcate

Asulcate

Fig. L

Lamprophiidae

*Lamprophis fuliginosus*

*Chamaelycus fasciatum*

*Lycodonomorphus rufulus*

Sulcate

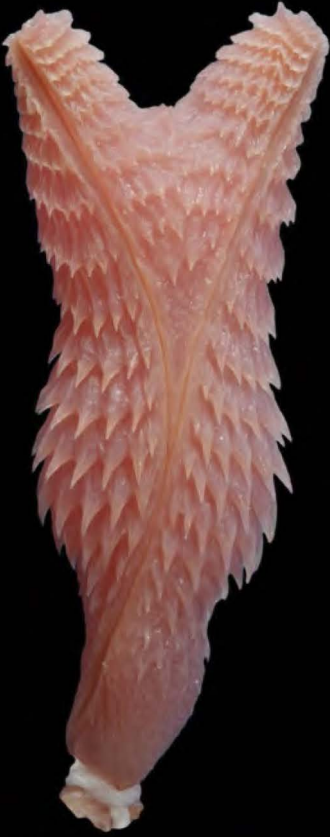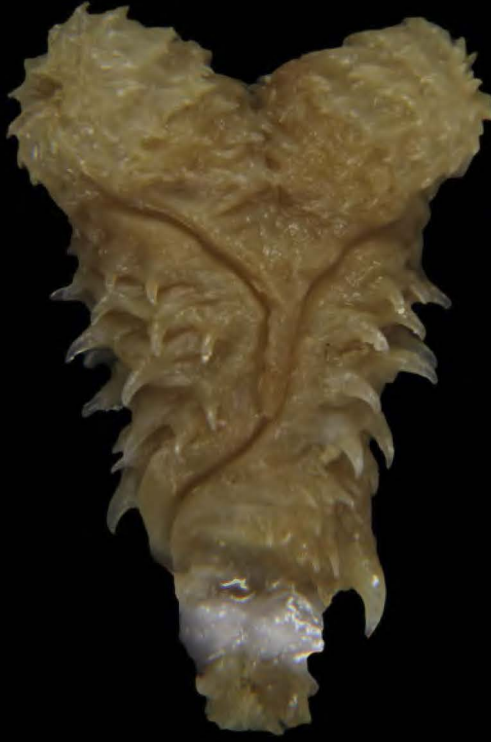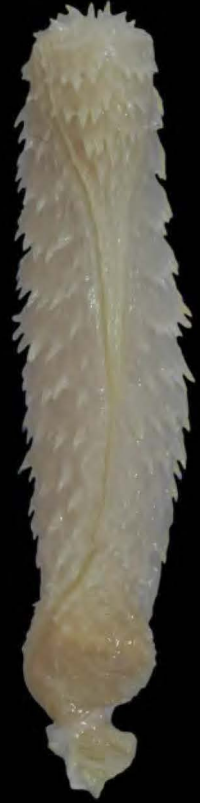

Asulcate

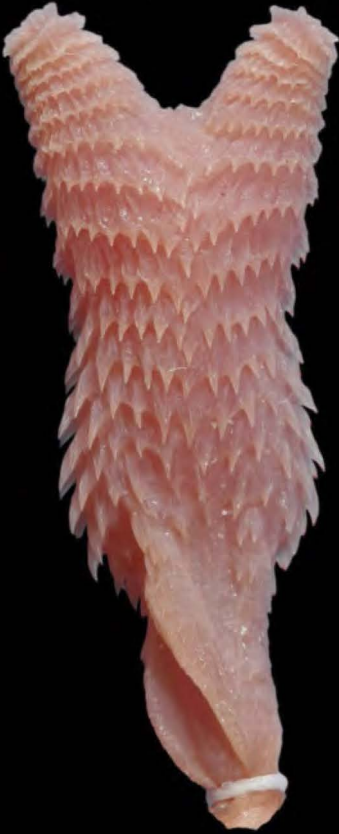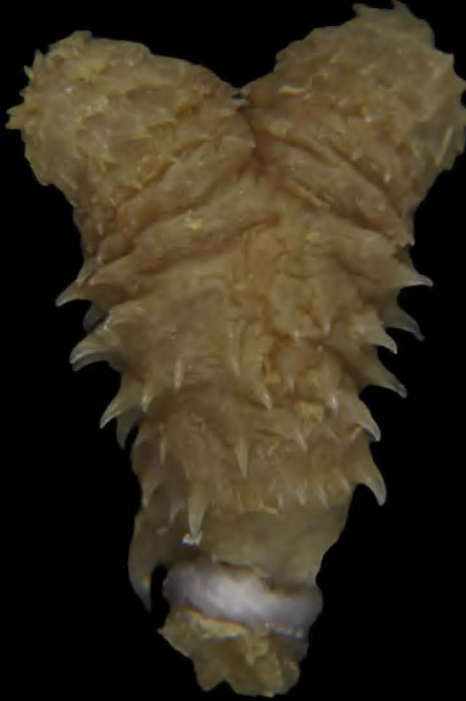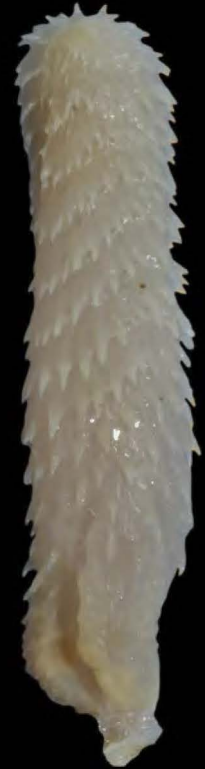

Apical

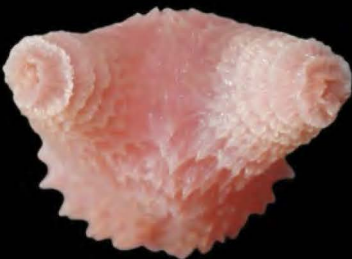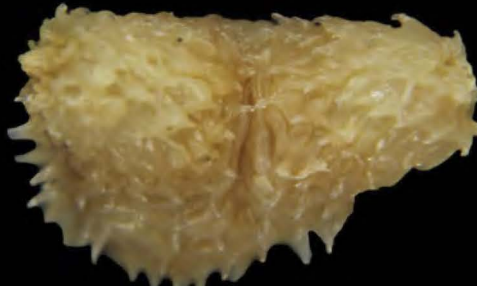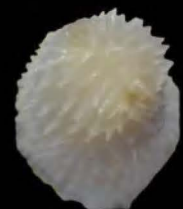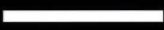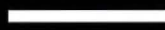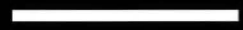

Fig. M

Lamprophiidae

*Lycophidion semicinctus*

*Mehelya capensis*

*Pseudoboodon lemniscatus*

Sulcate

Asulcate

Apical

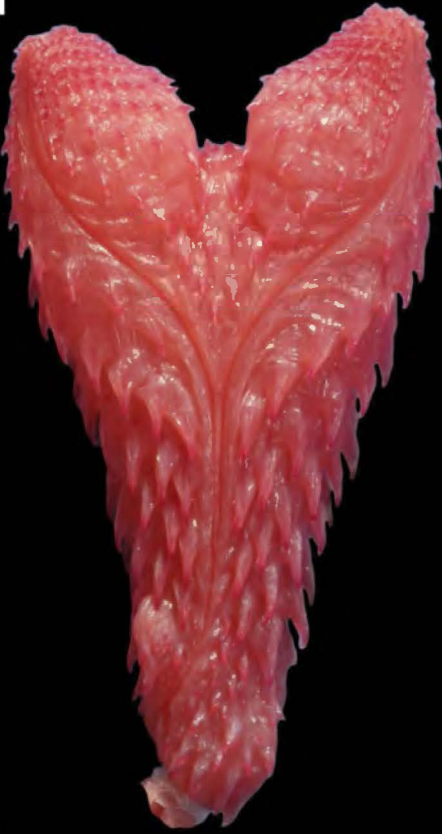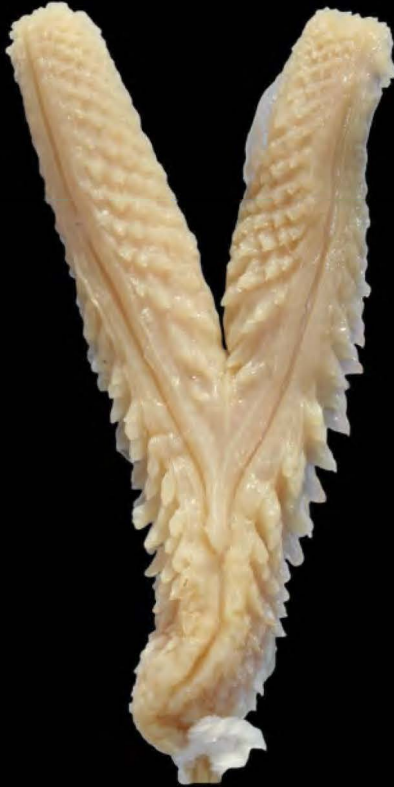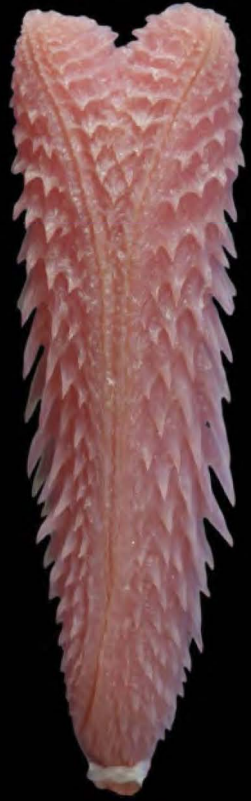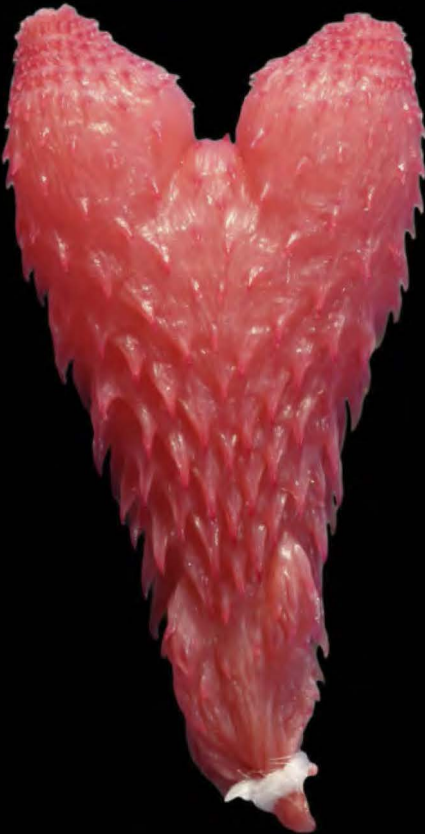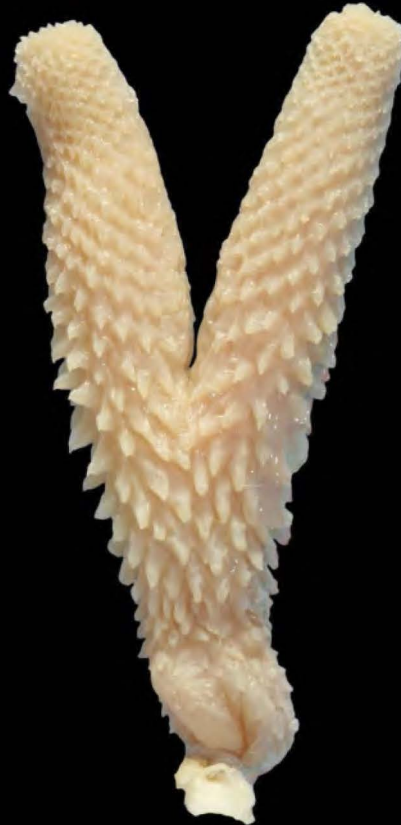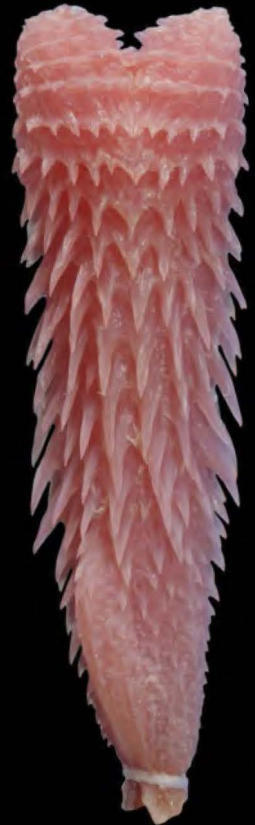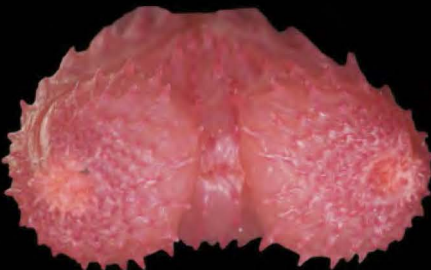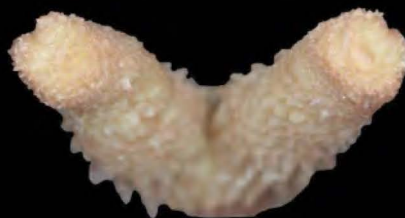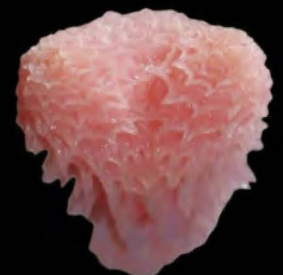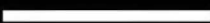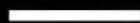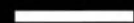

Fig. N

Pseudoxyrhopiidae

*Dromicodryas bernieri*

*Duberria lutrix*

*Alluaudina bellyi*

Sulcate

Asulcate

Apical

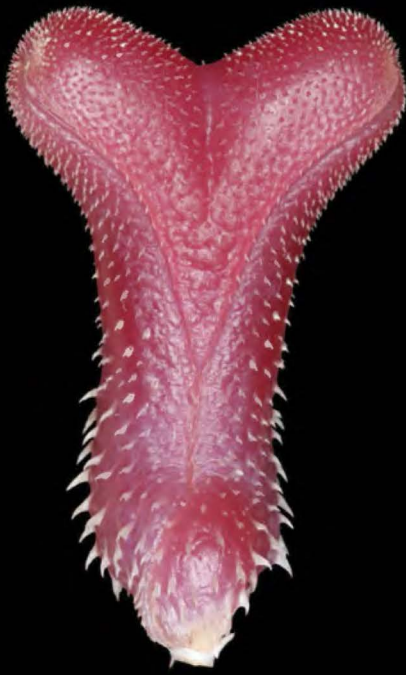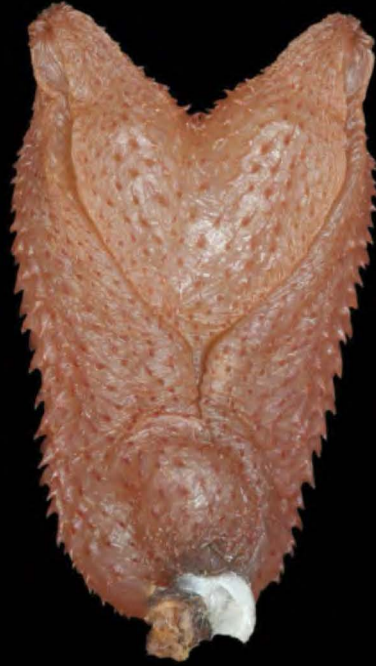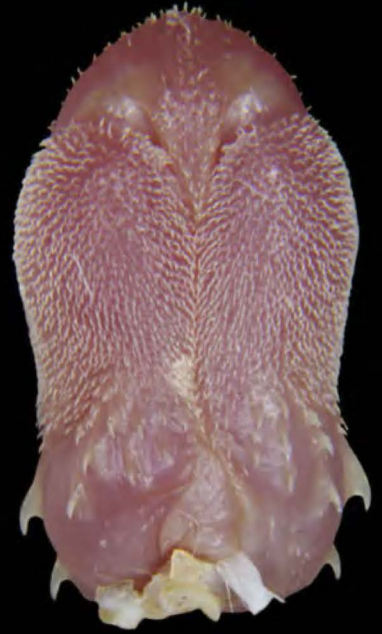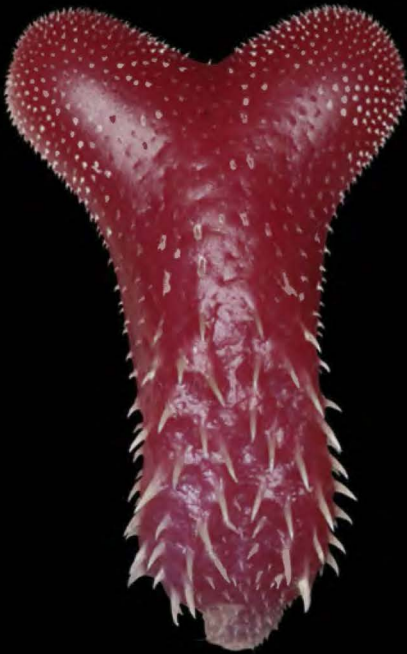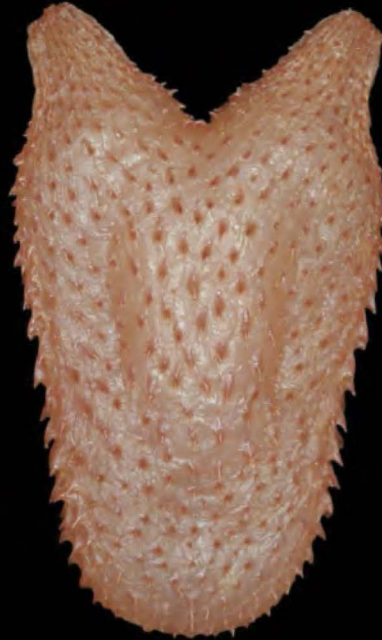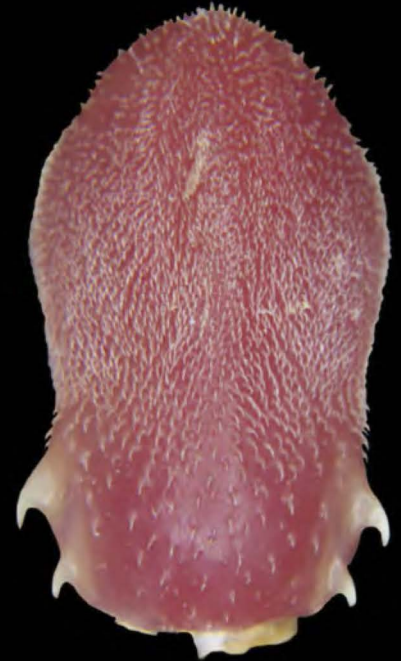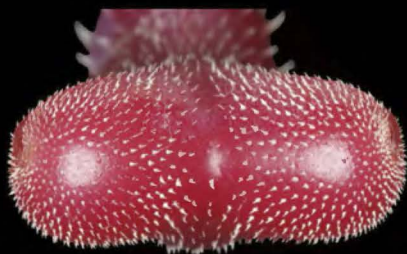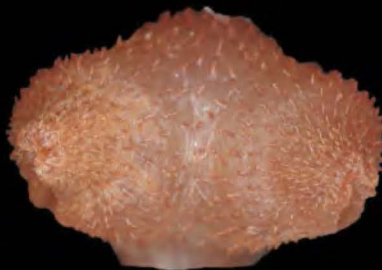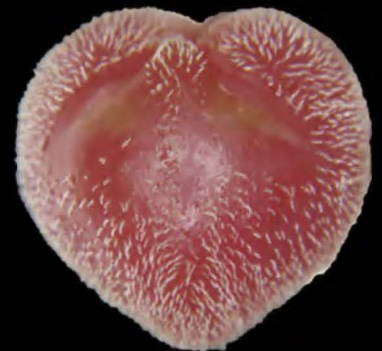

Fig. O

Pseudoxyrhopiidae

*Pseudoxyrhopus tritaeniatus*

*Liophidium torquatum*

Sulcate

Asulcate

Apical

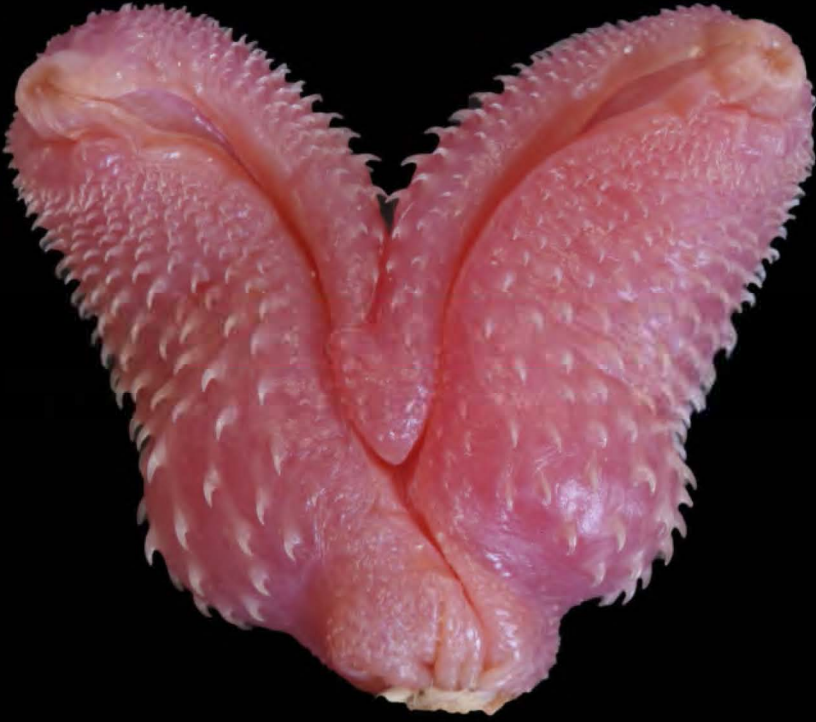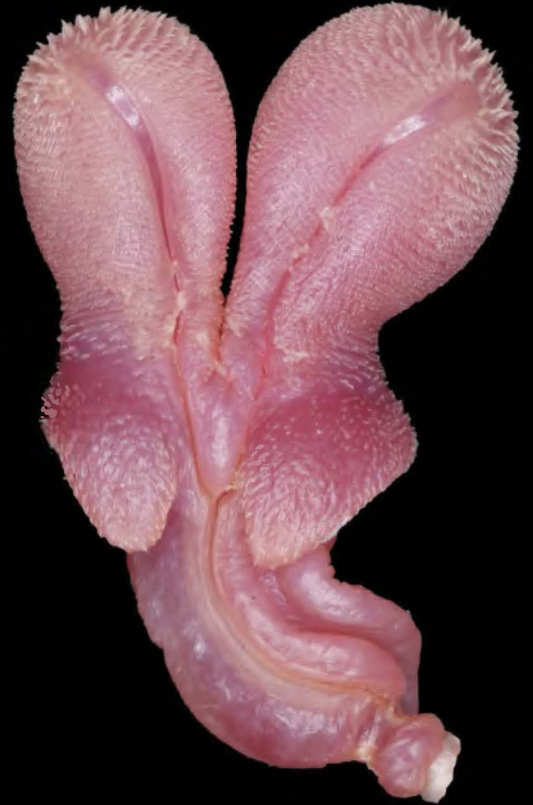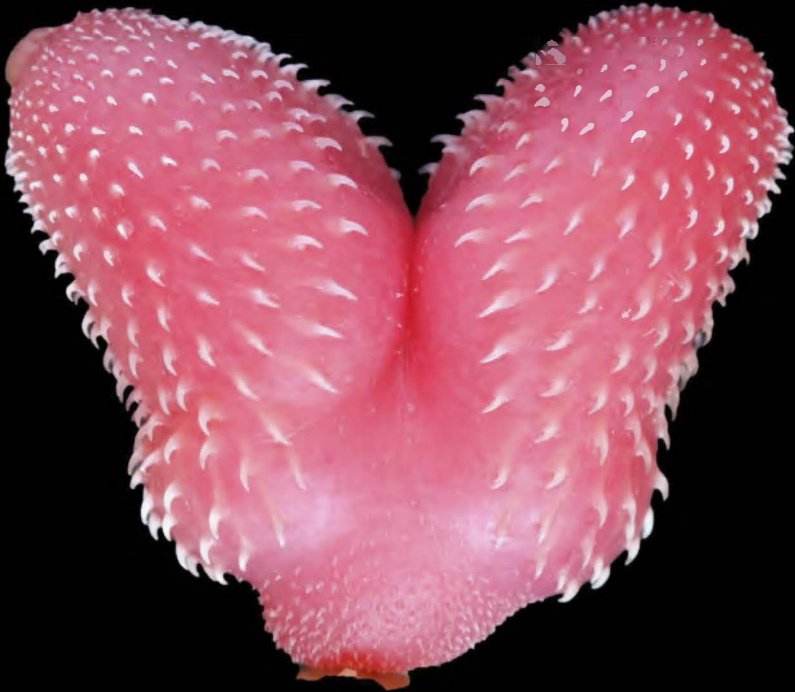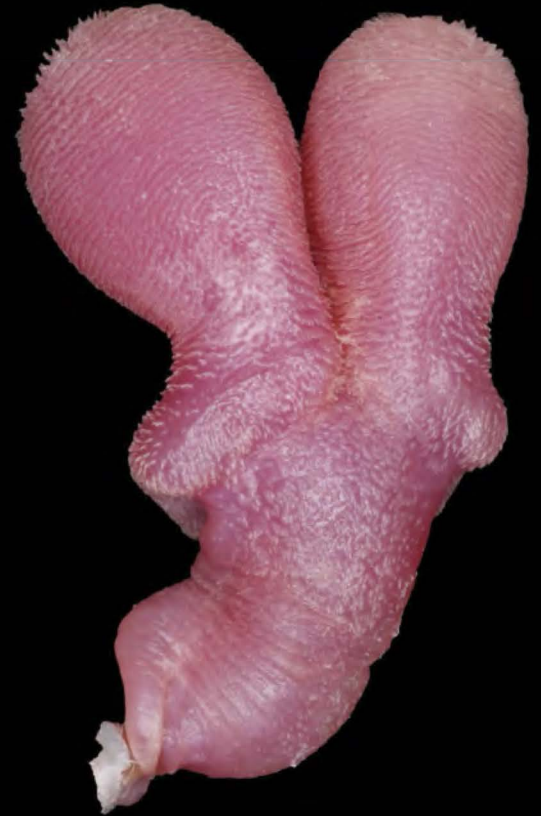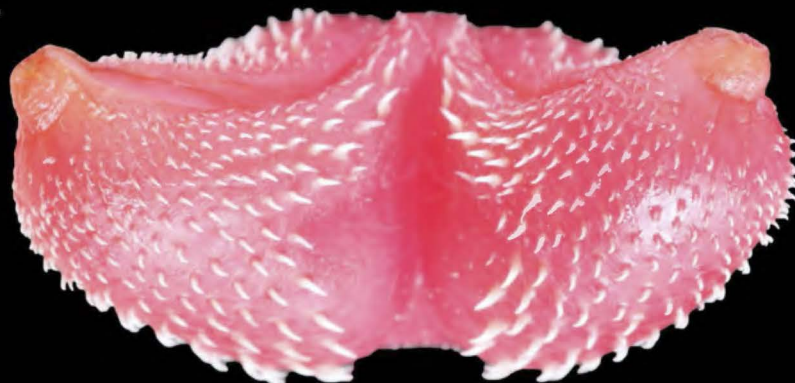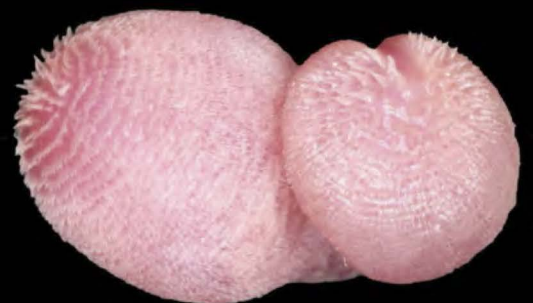



Fig. P

Elapidae

*Naja melanoleuca*

*Micrurus frontalis*

Sulcate

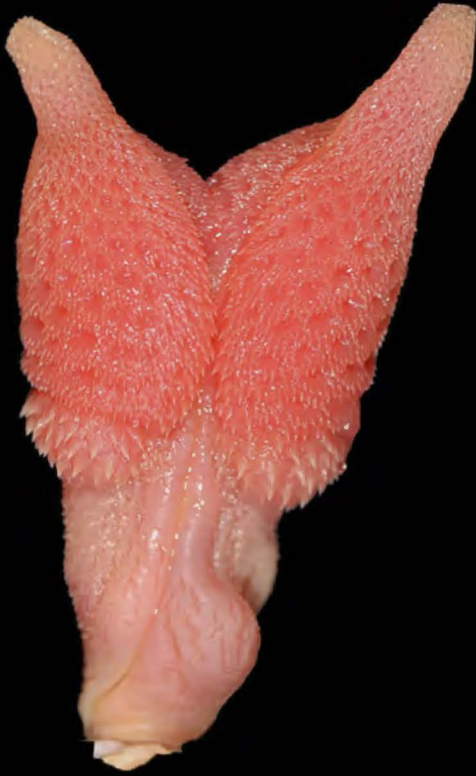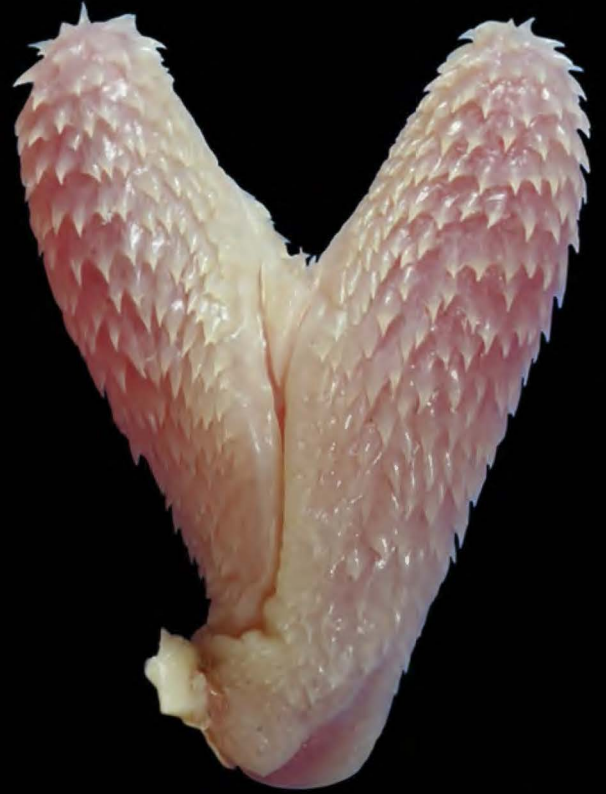

Asulcate

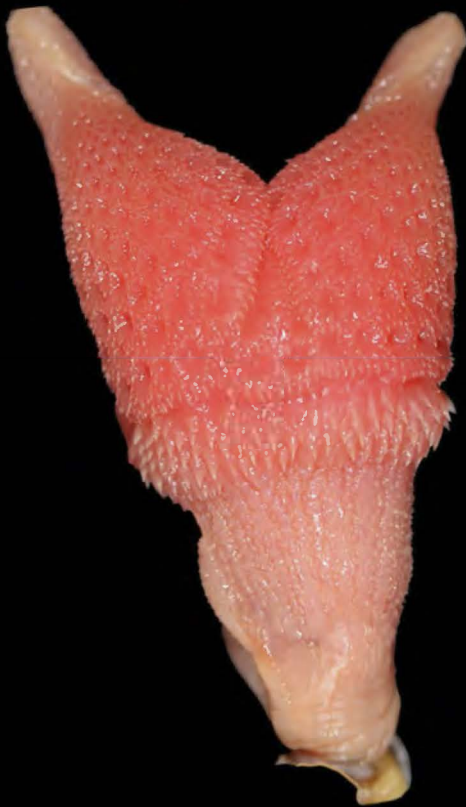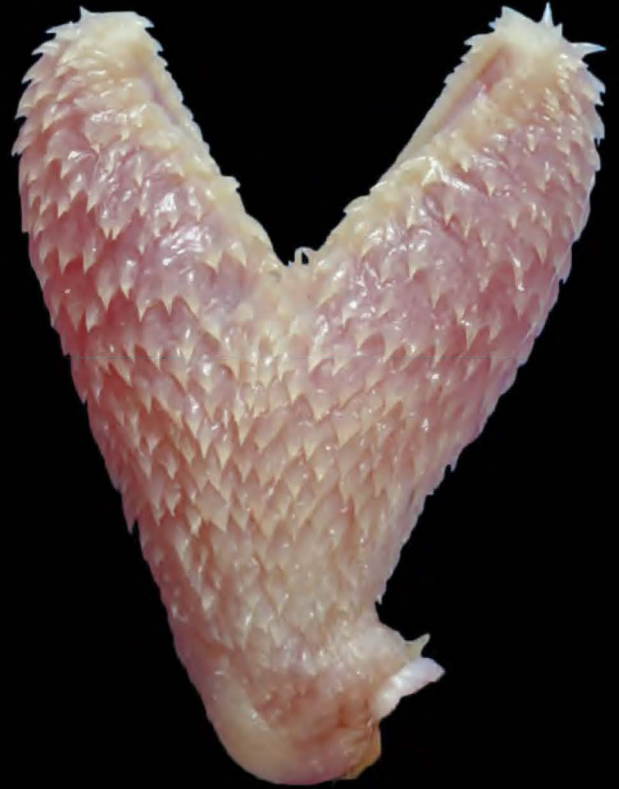

Apical

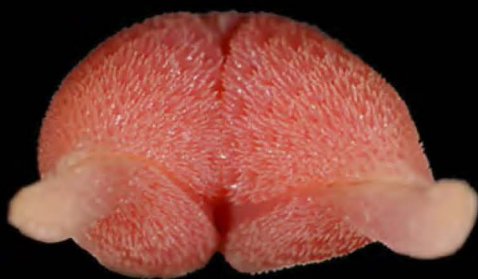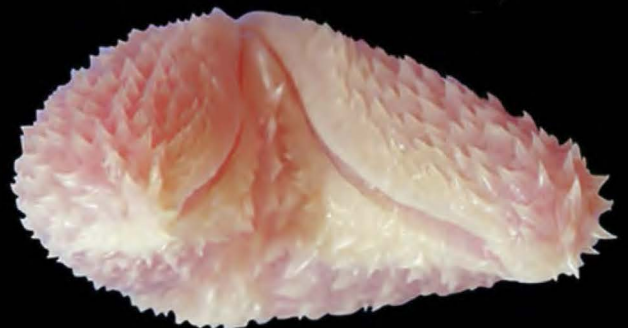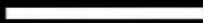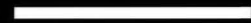

Fig. Q

Elapidae

*Austrelaps superbus*

*Bungarus candidus*

Sulcate

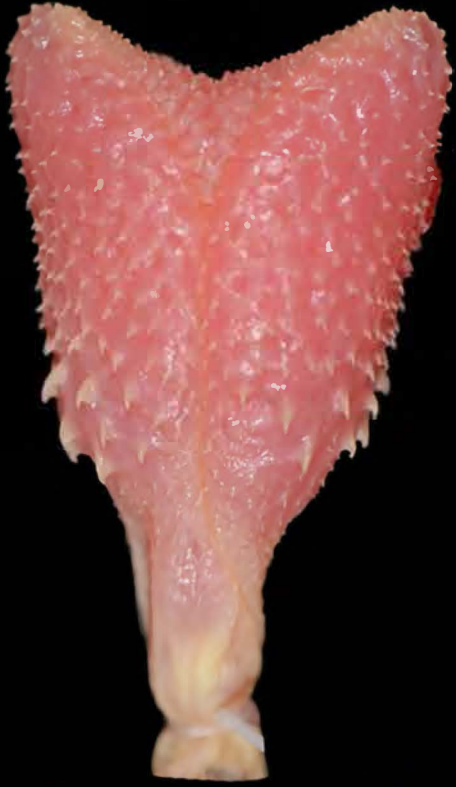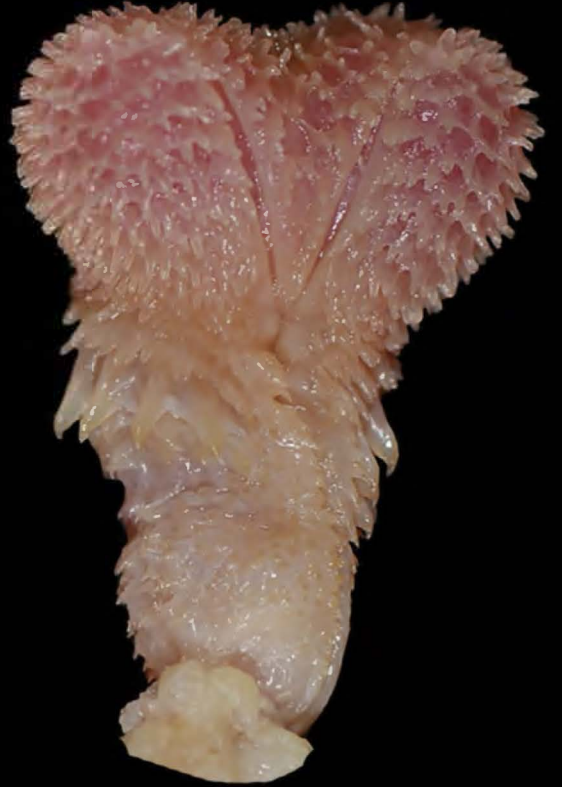

Asulcate

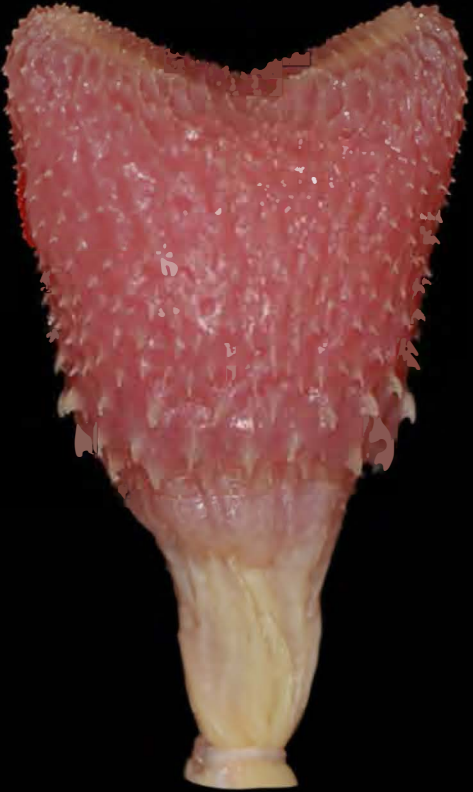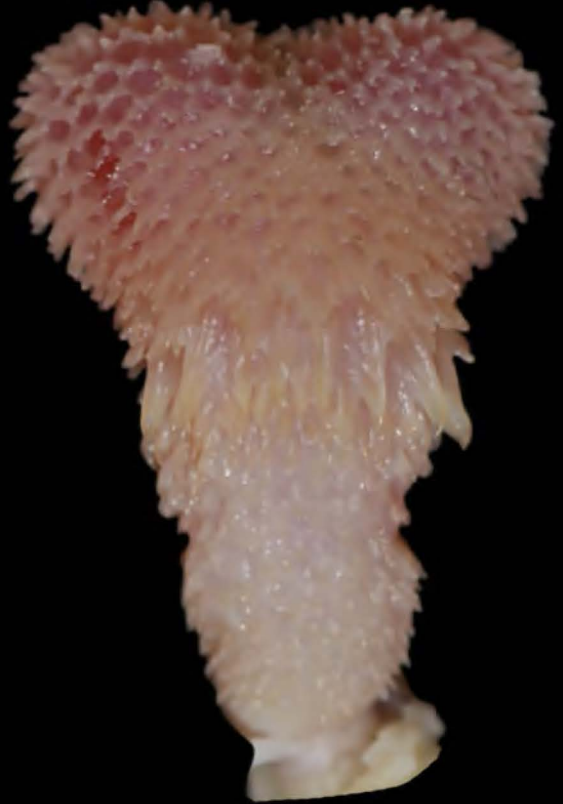

Apical

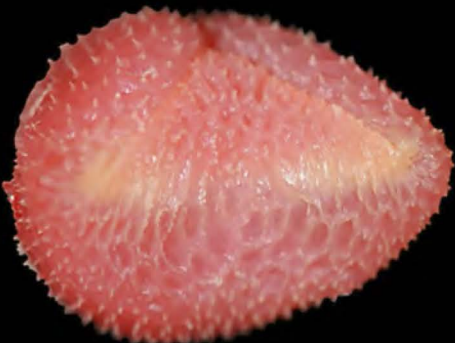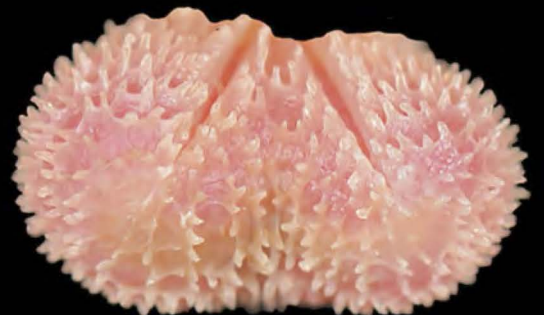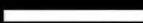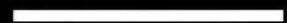

Fig. R

Natricidae

*Atretium schistosum*

*Lycognathophis seychellensis*

*Afronatrix anoscopus*

Sulcate

Asulcate

Apical

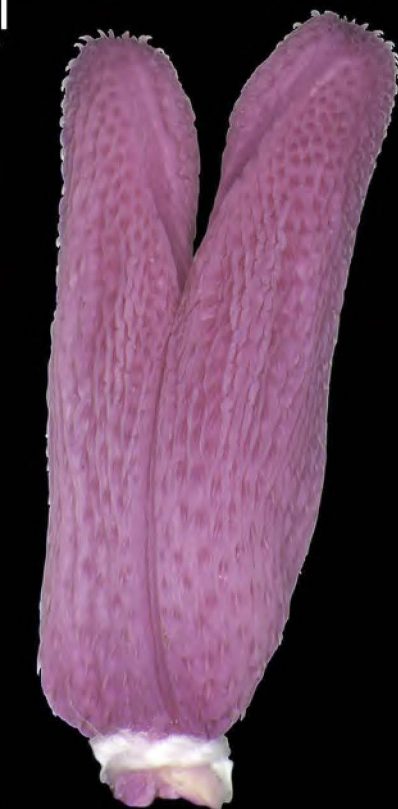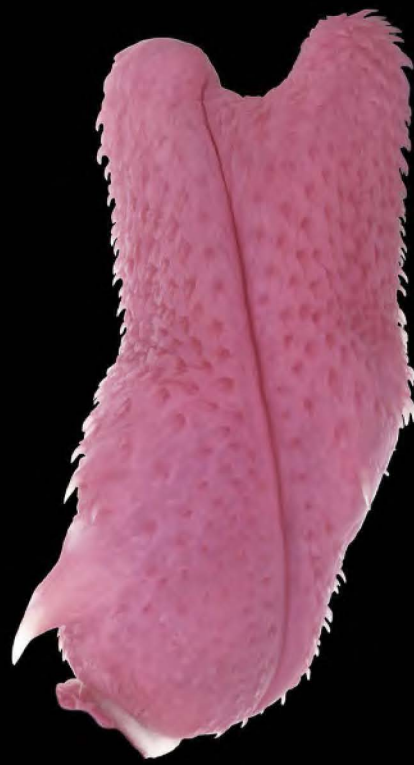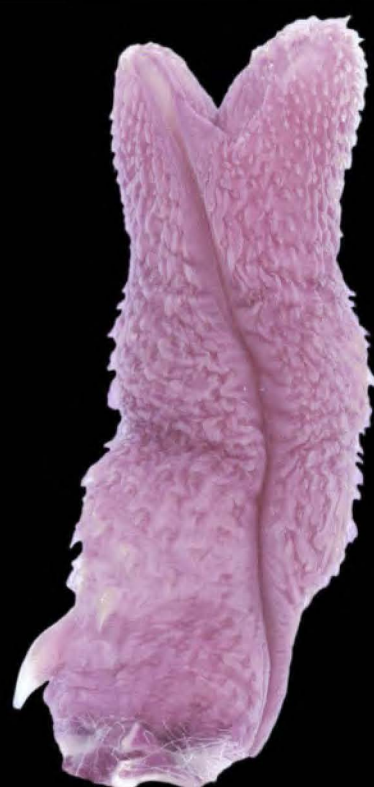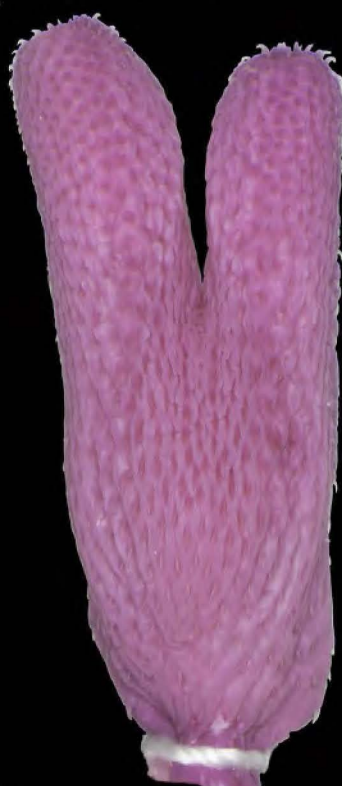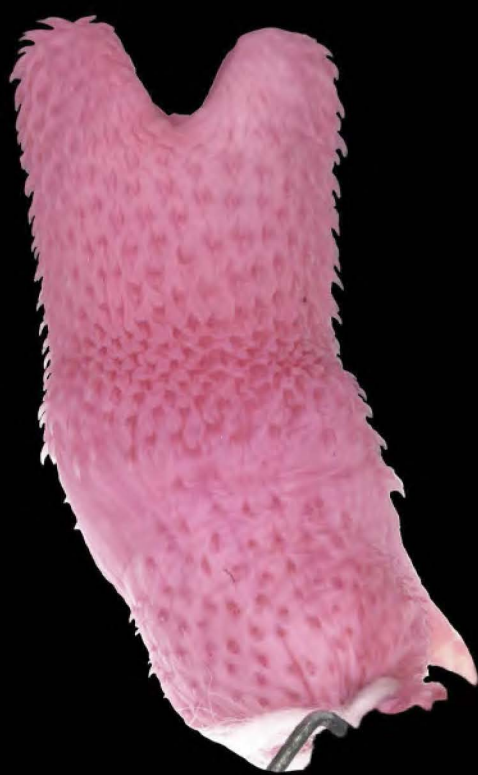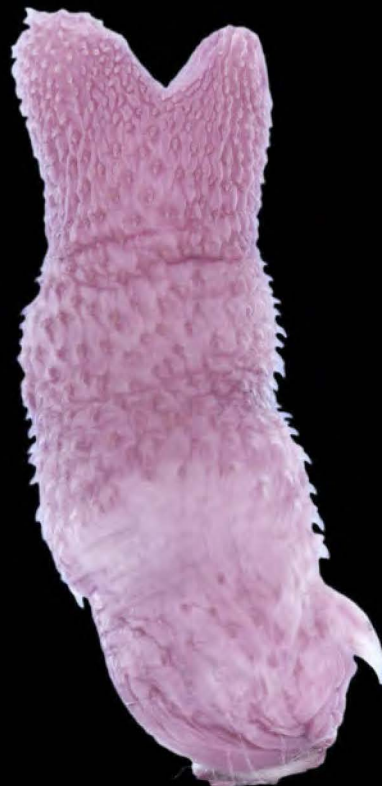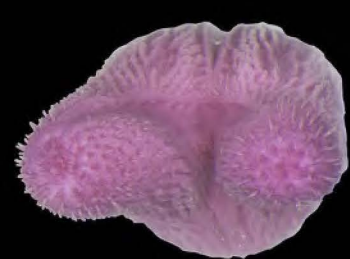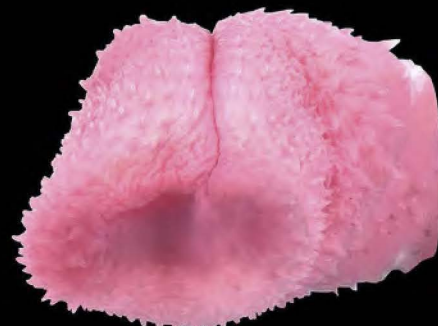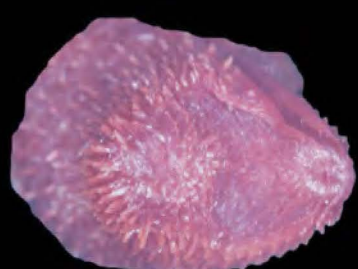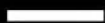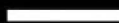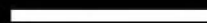

**Fig. S**

**Natricidae**

*Xenochrophis vittatus*

*Natriciteres olivacea*

*Sinonatrix annularis*

Sulcate

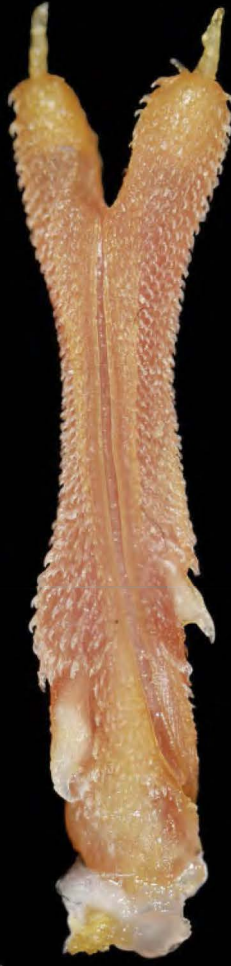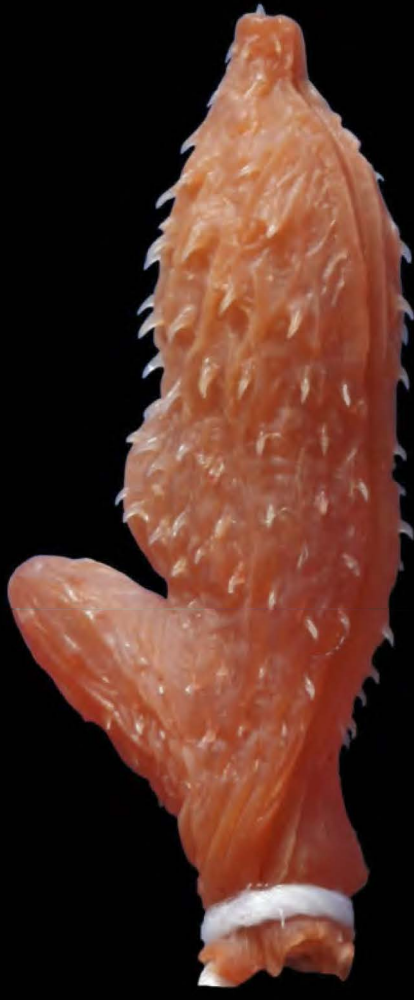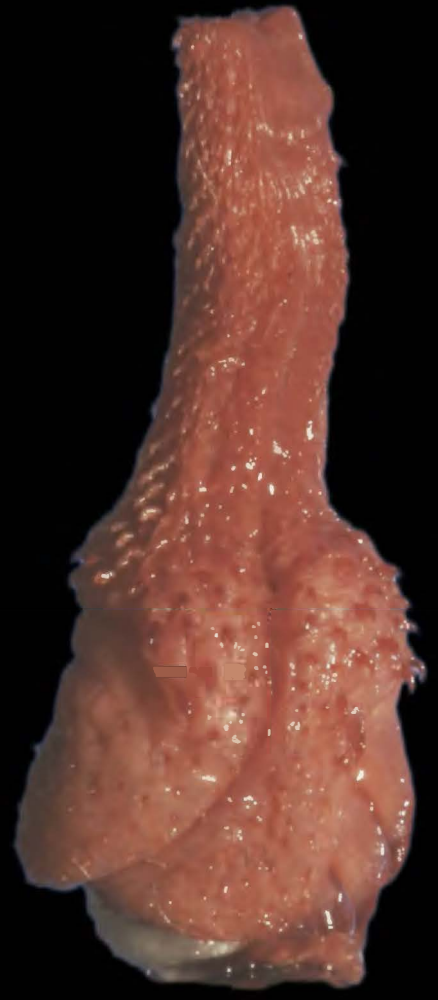

Asulcate

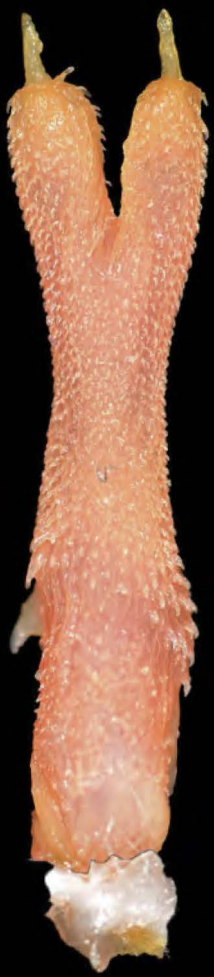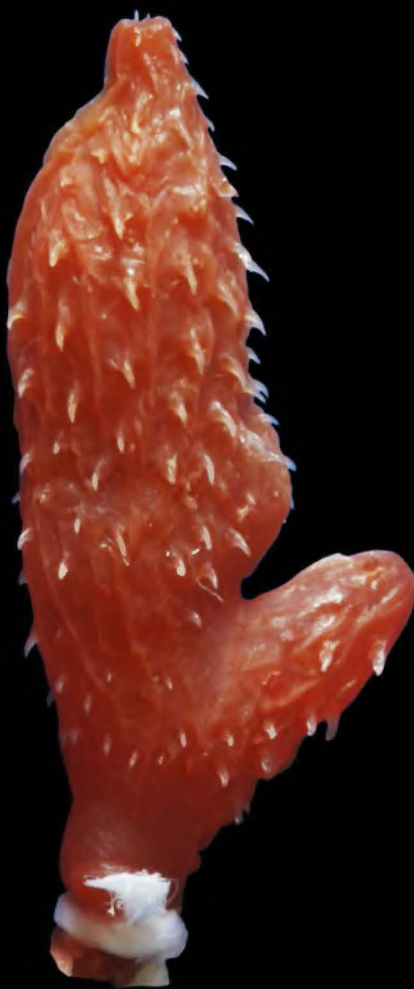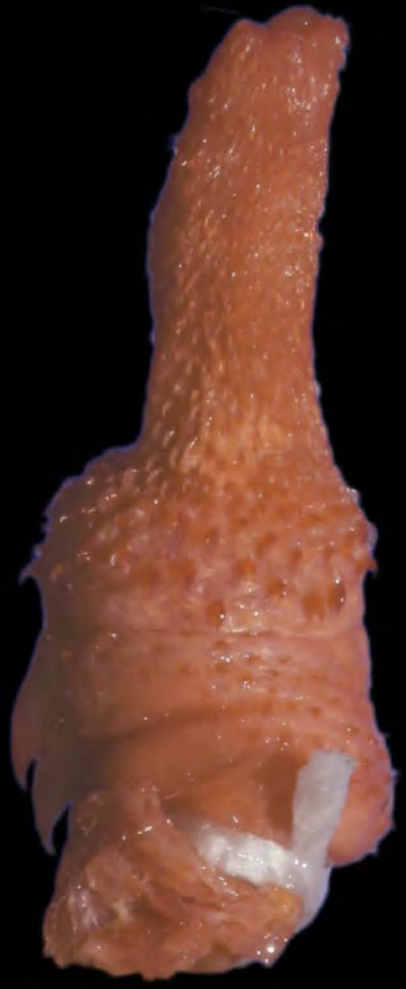

Fig. T

Natricidae

*Aspidura trachyrocta*

*Elapoidis fusca*

Sulcate

Asulcate

Apical

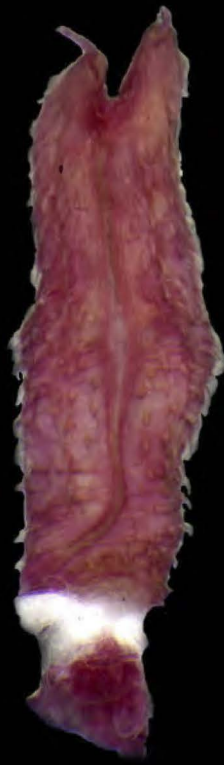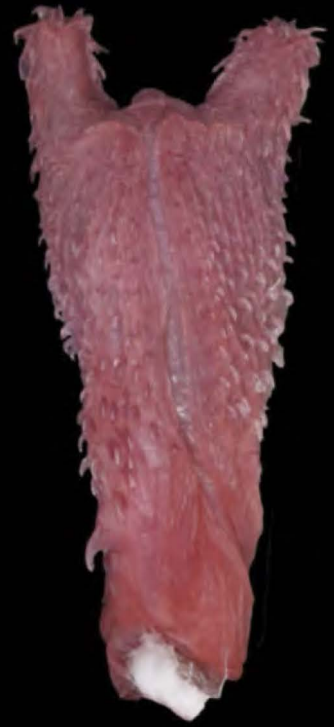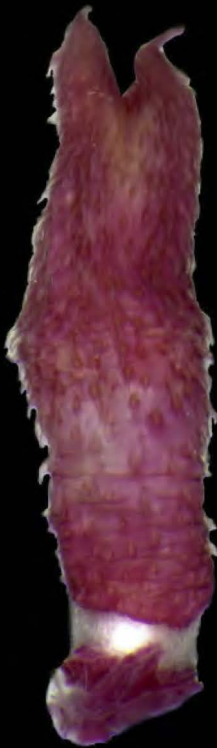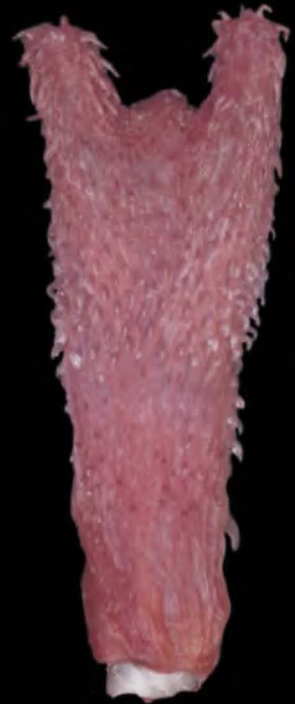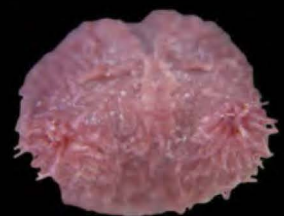

Fig. U Pseudoxenodontidae

*Pseudoxenodon macrops*

Dipsadidae

*Conophis pulcher*

Sulcate

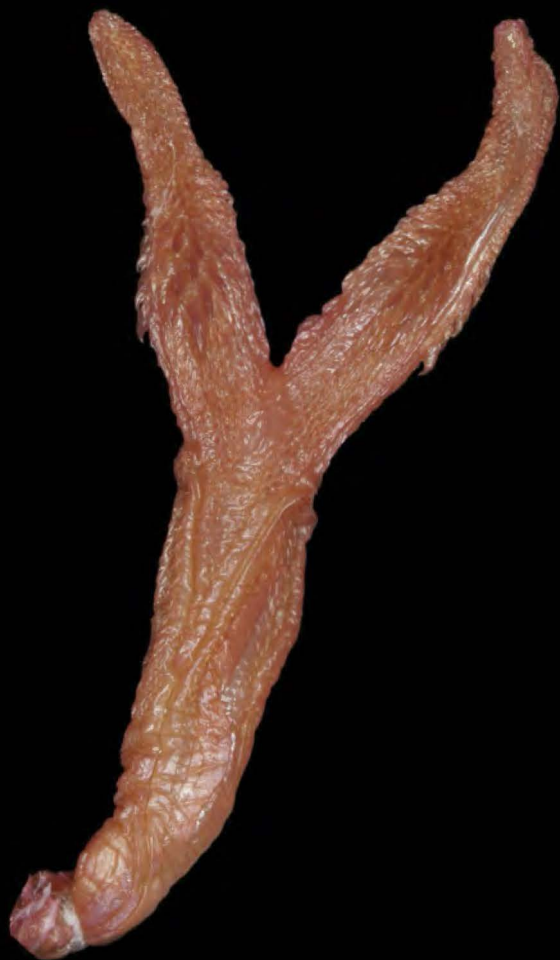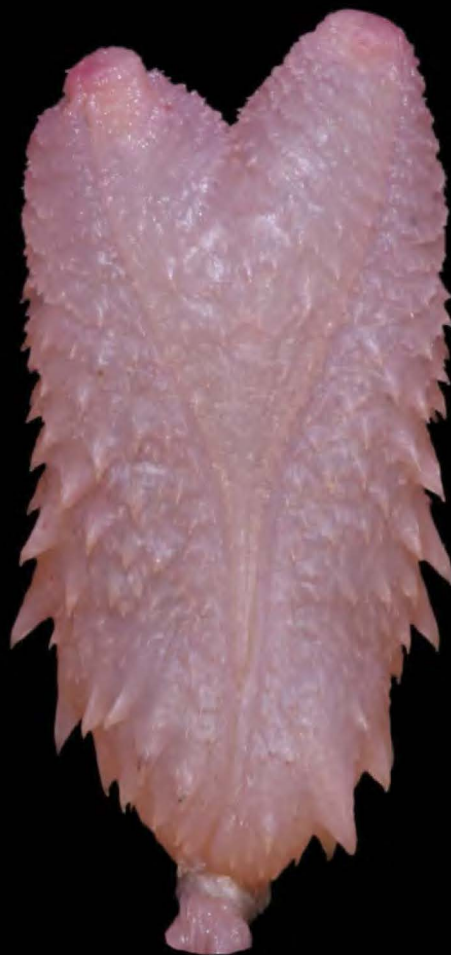

Asulcate

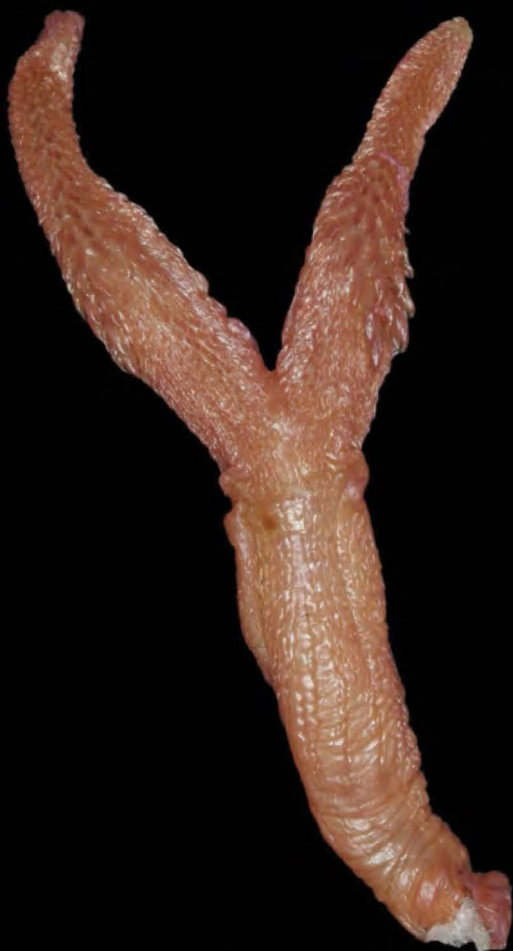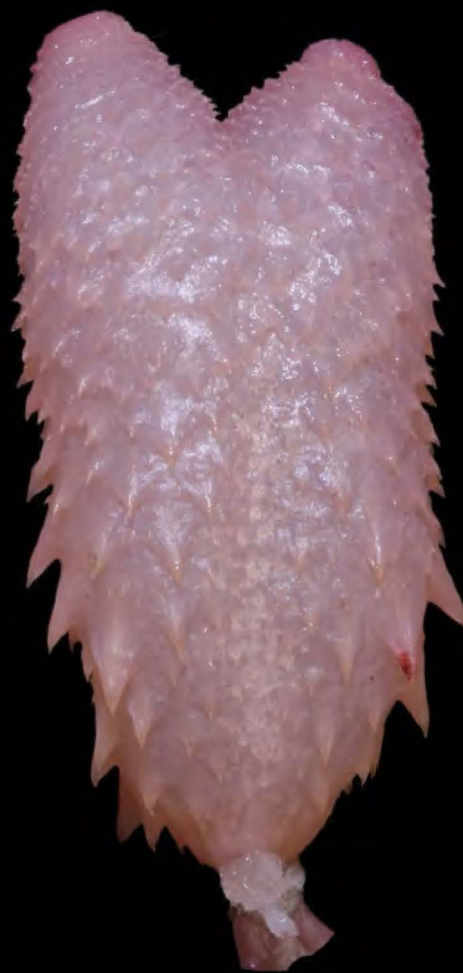

Fig. V

Dipsadidae

*Contia tenuis*

*Urotheca decipien*

Sulcate

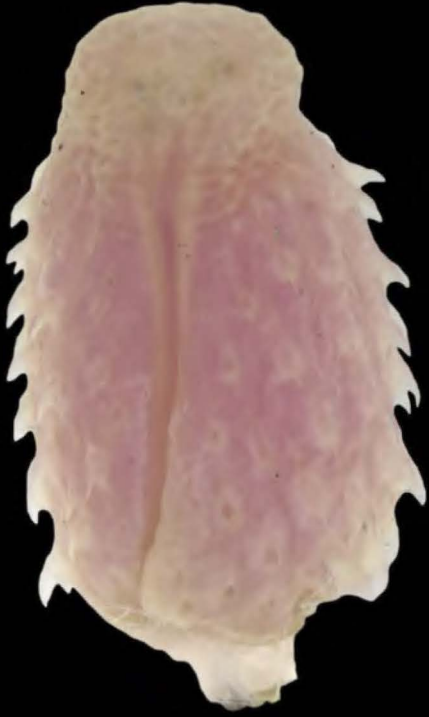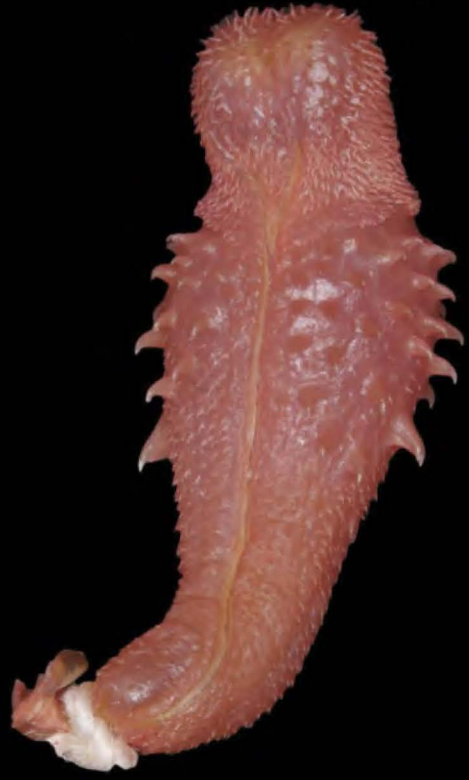

Asulcate

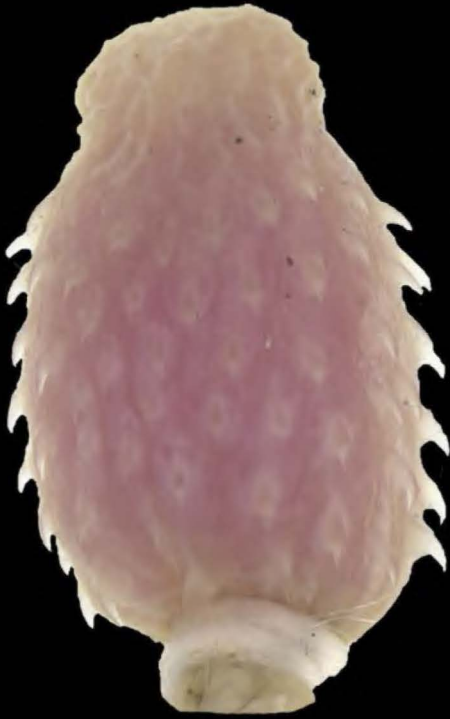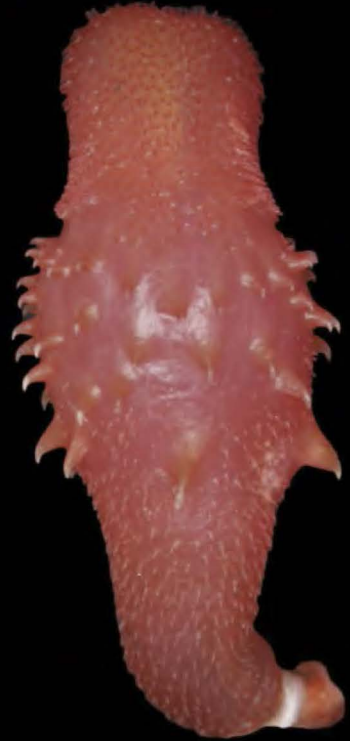

Apical

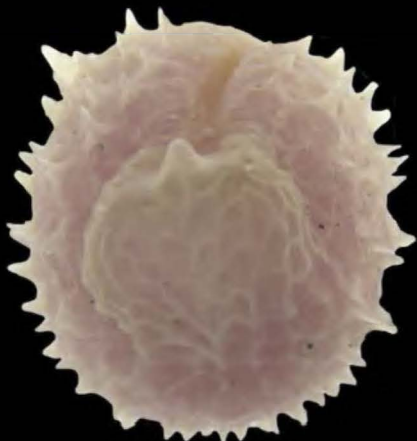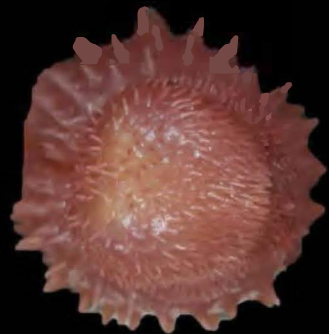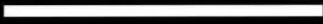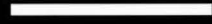

Fig. W

Dipsadidae

*Oxyrhopus occipitalis*

*Farancia erythrogramma*

Sulcate

Asulcate

Apical

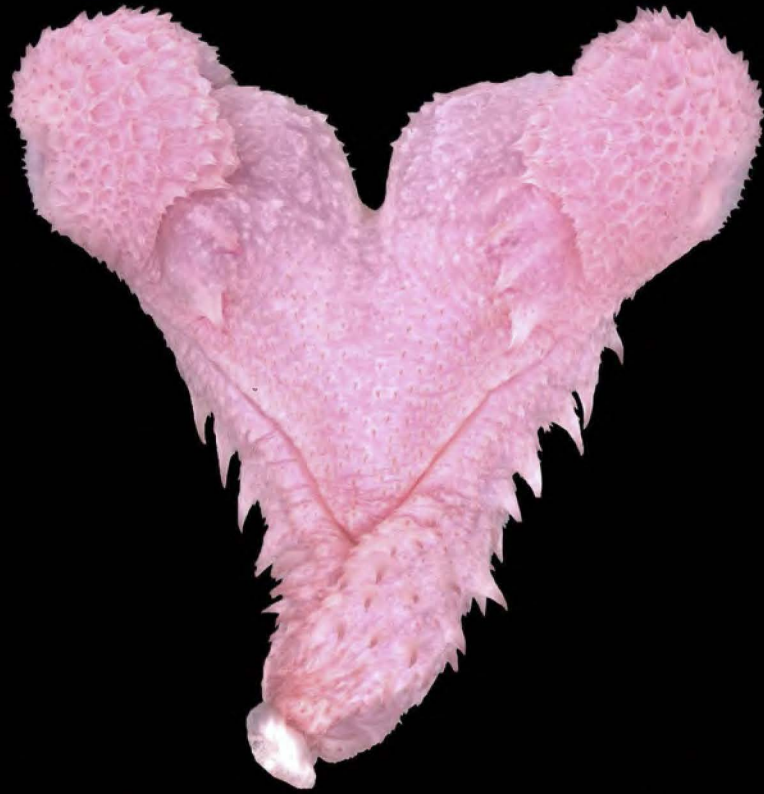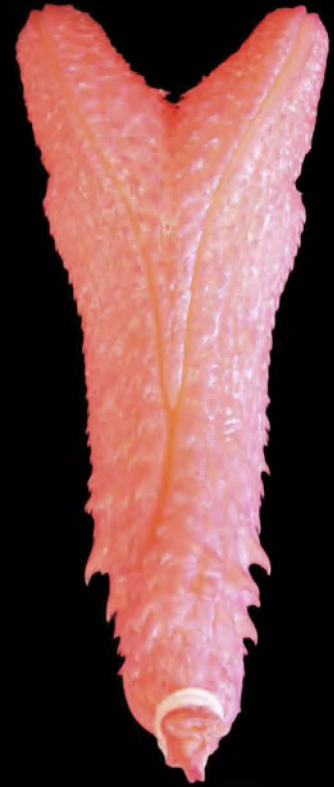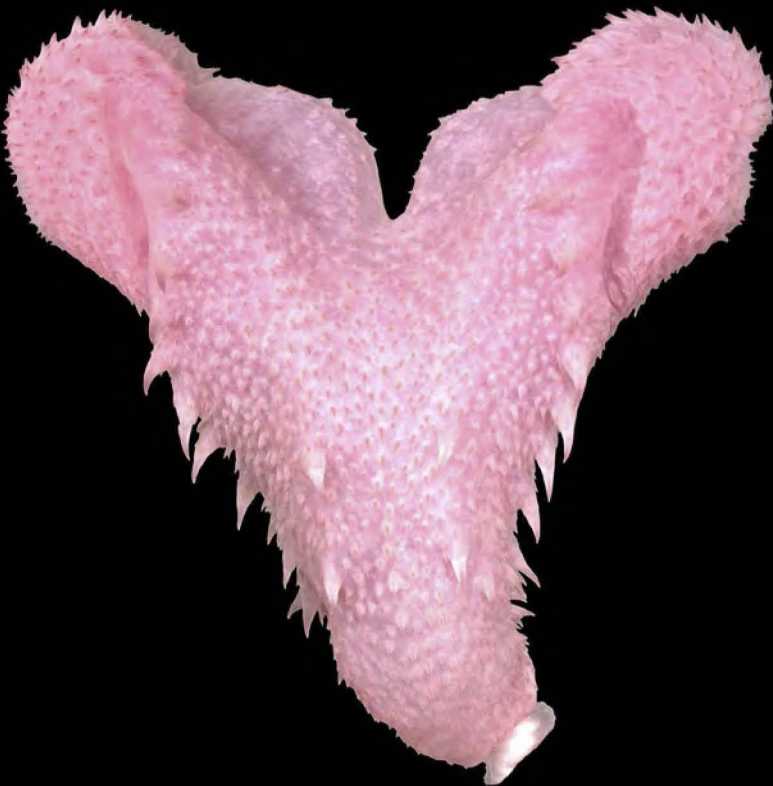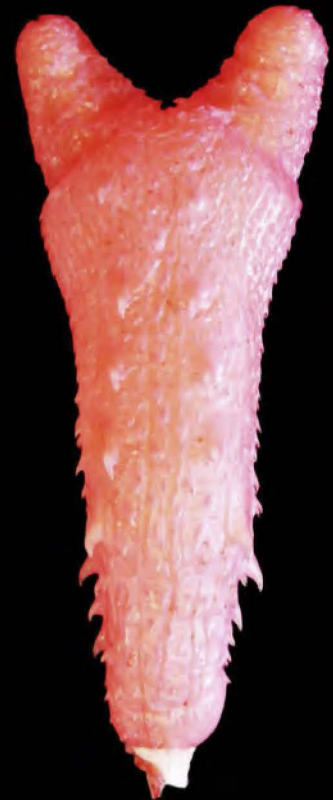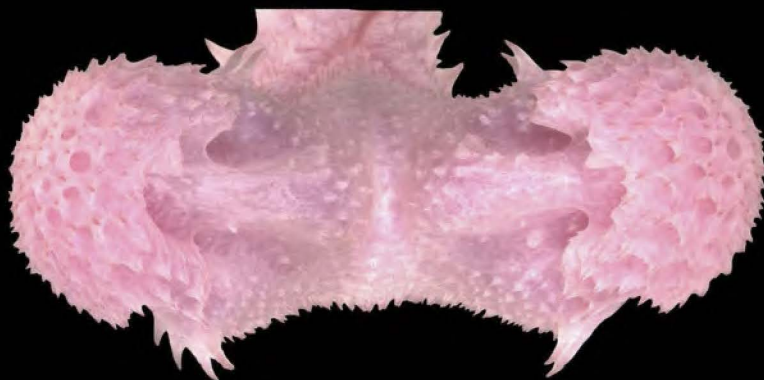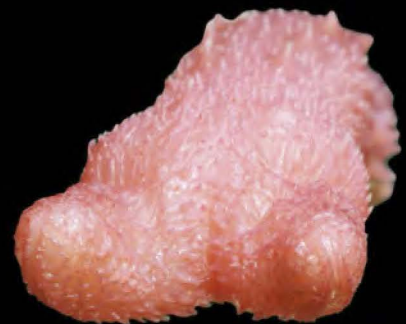



Fig. X

Dipsadidae

*Tachymenis chilensis*

*Heterodon nasicus*

*Philodryas olfersii*

Sulcate

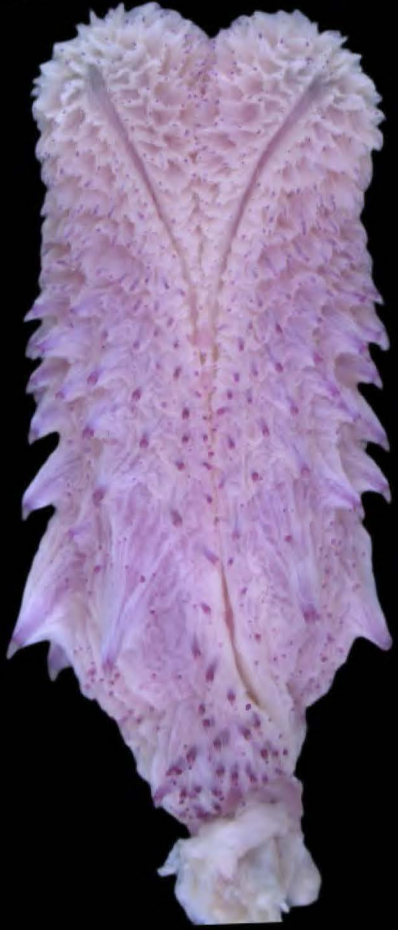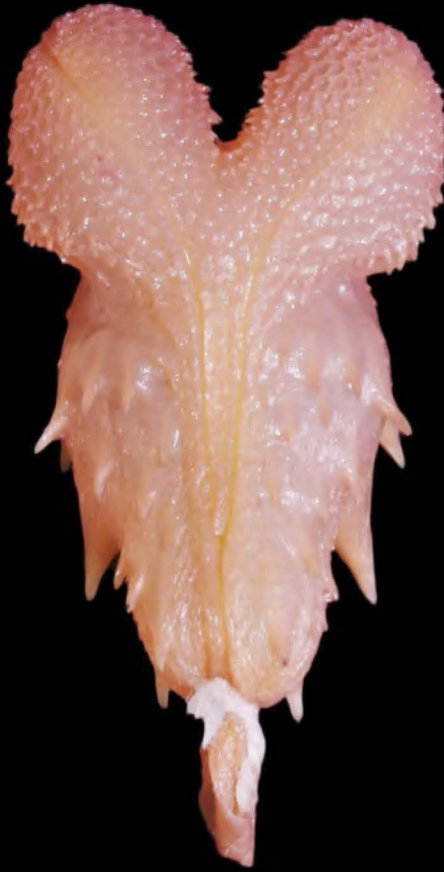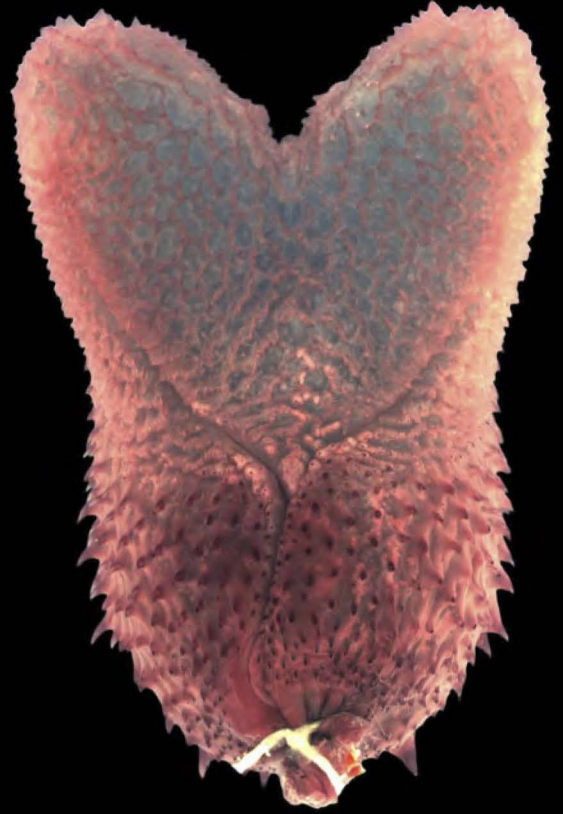

Asulcate

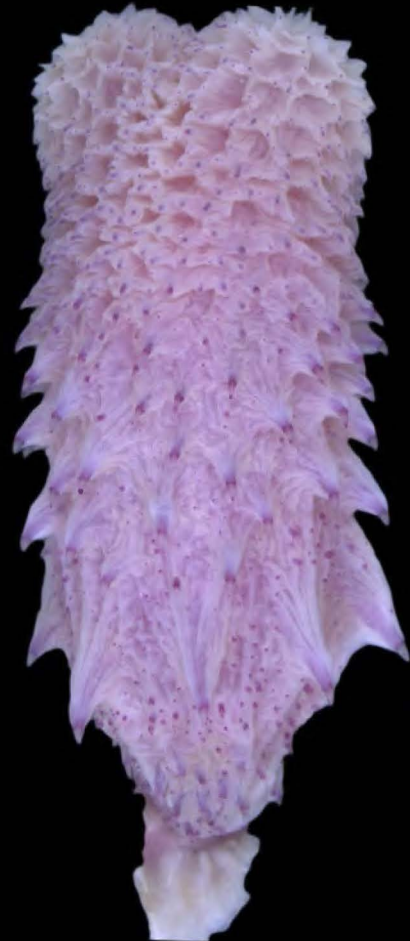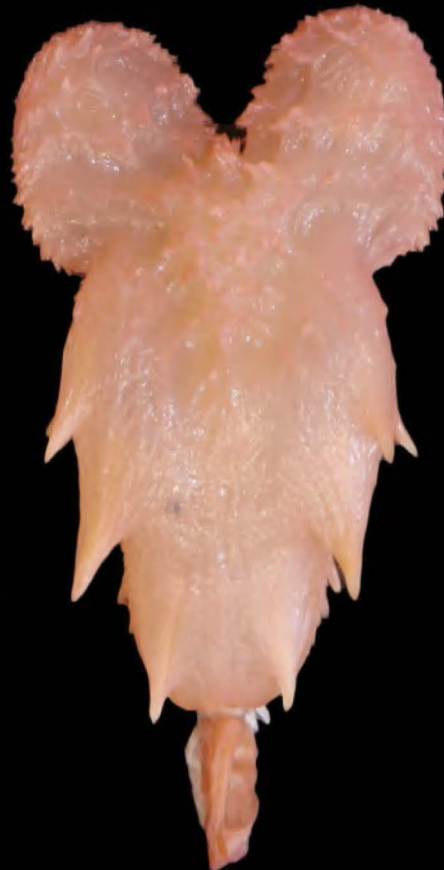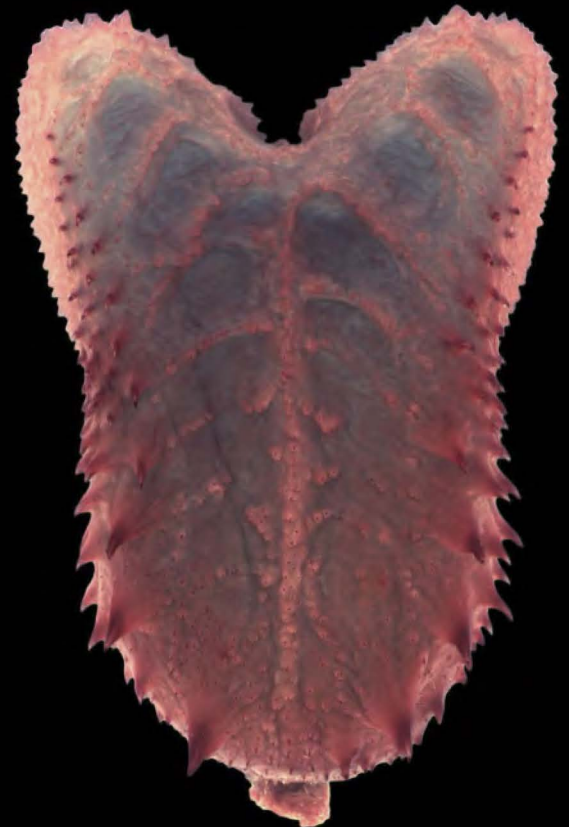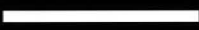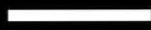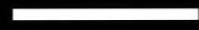

Fig. Y

Sibynophiidae

Calamariidae

*Sibynophis chinensis* *Scaphiodontophis annulatus*

*Pseudorabdion longiceps*

Sulcate

Asulcate

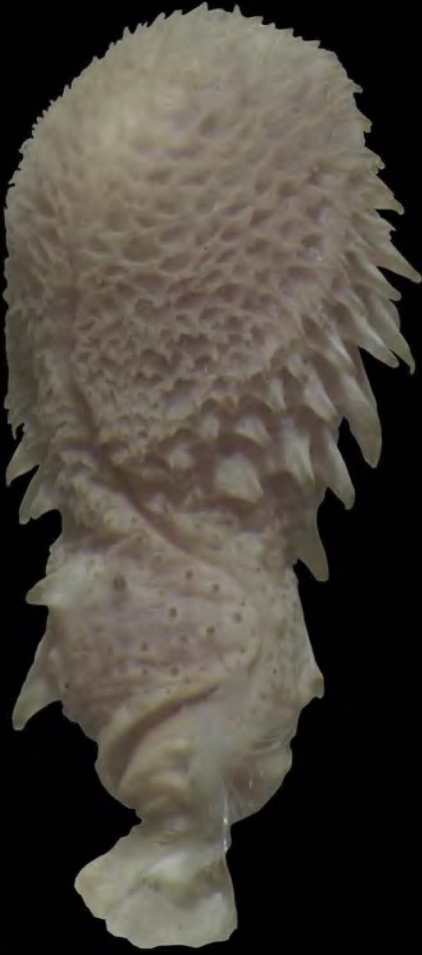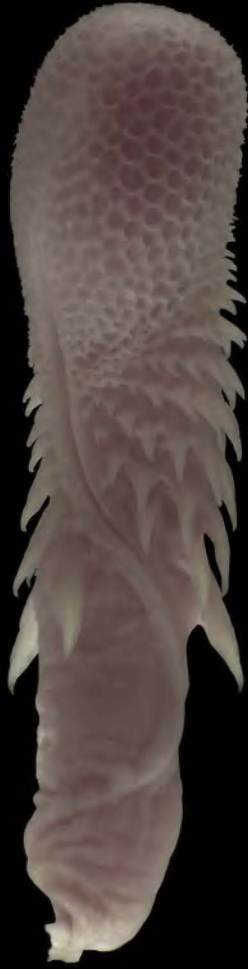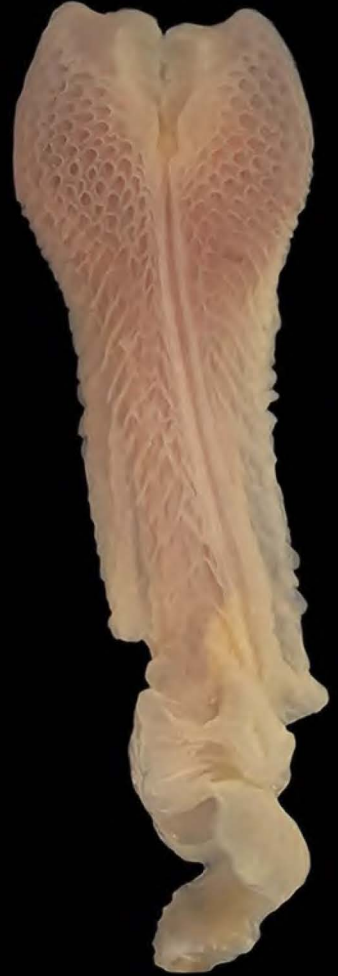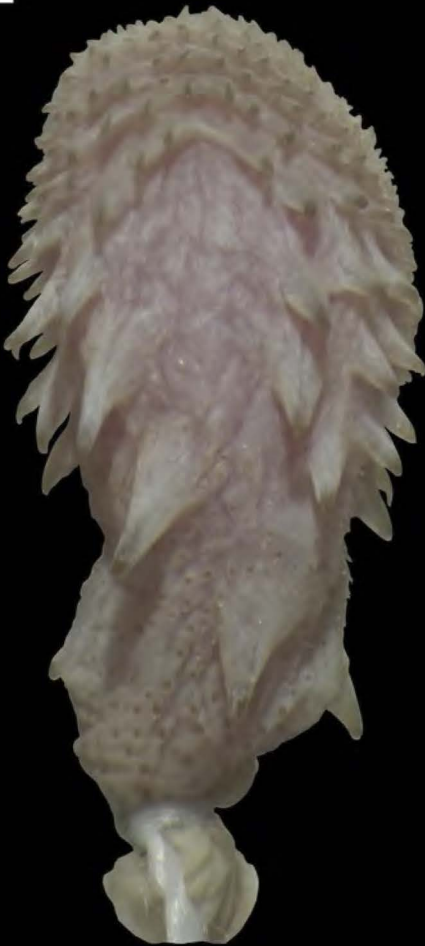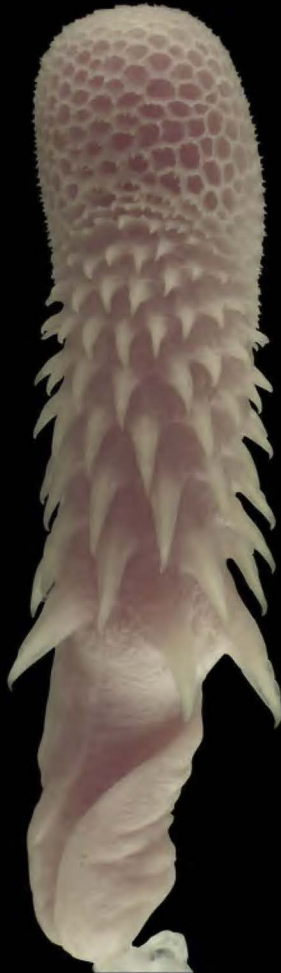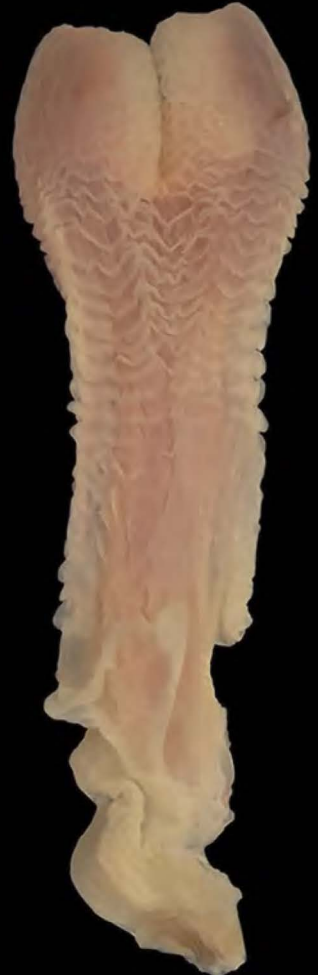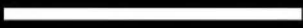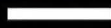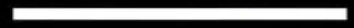

**Fig. Z**

**Calamariidae**

*Calamaria lumbricoidis*

*Calamaria linnaei*

*Oreocalamus hanitschi*

Sulcate

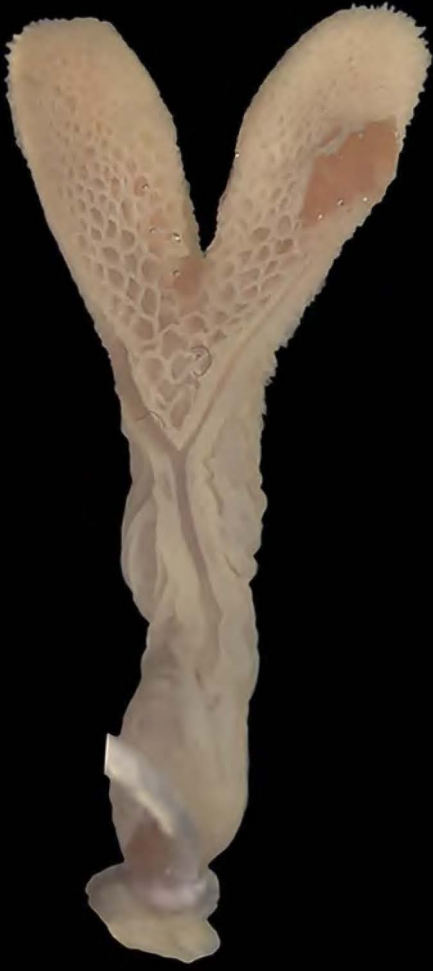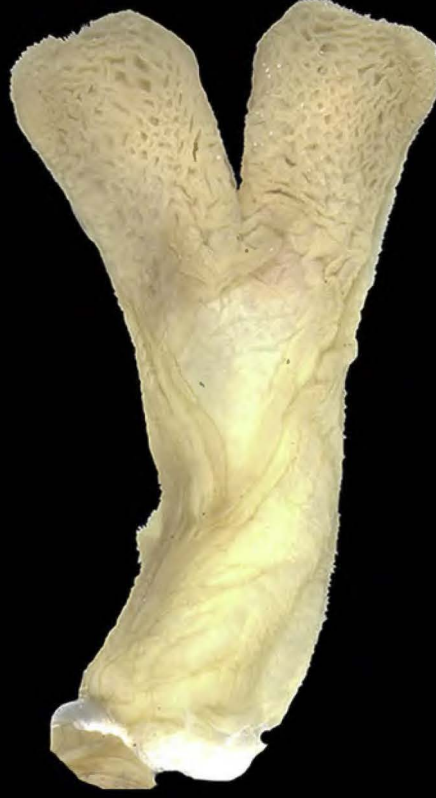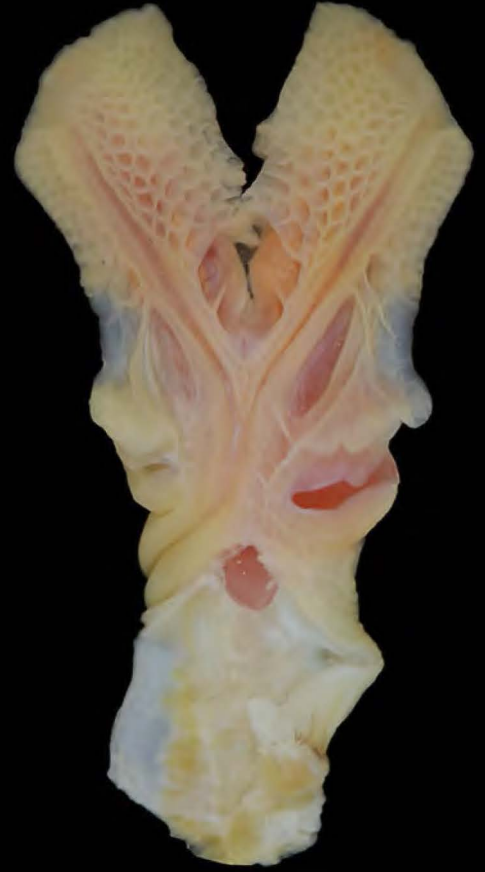

Asulcate

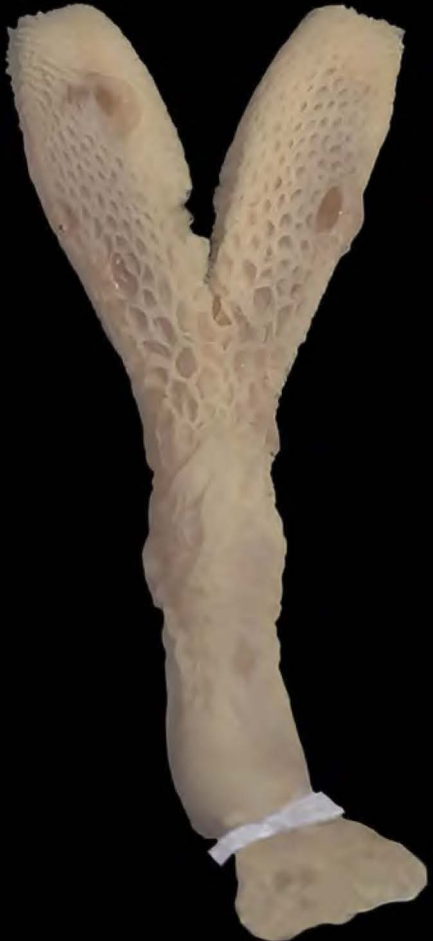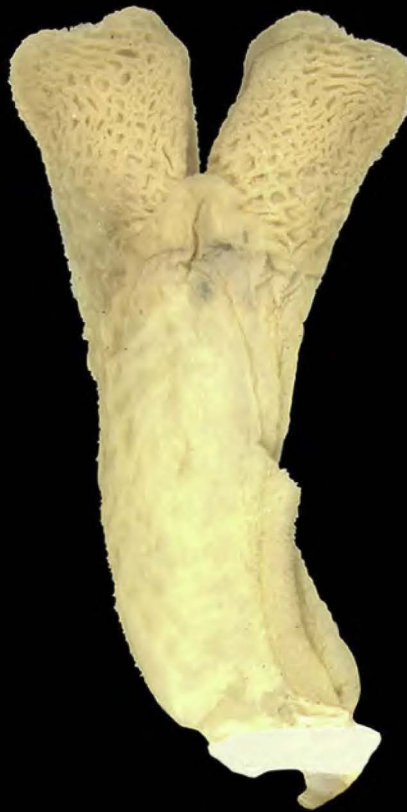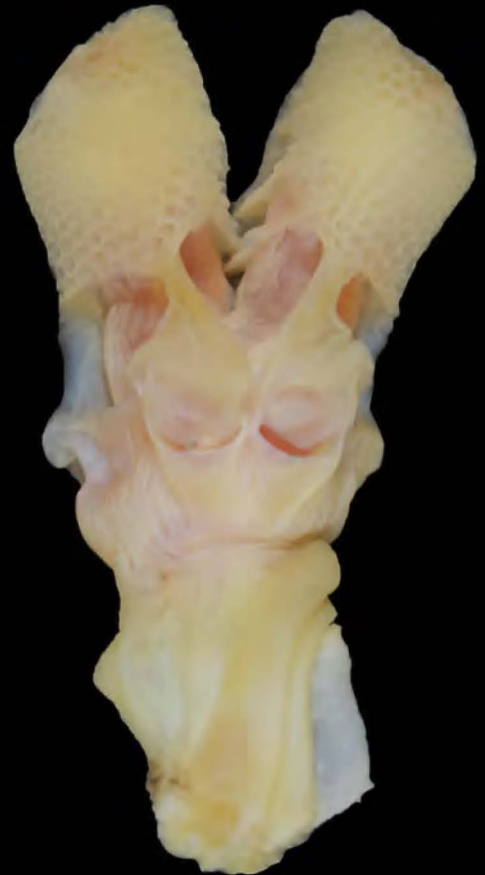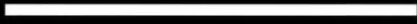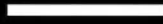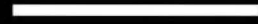

Fig. AA

Grayiidae

*Grayia ornata*

Colubridae

*Pantherophis guttatus*

*Spilotes sulphureus*

Sulcate

Asulcate

Apical

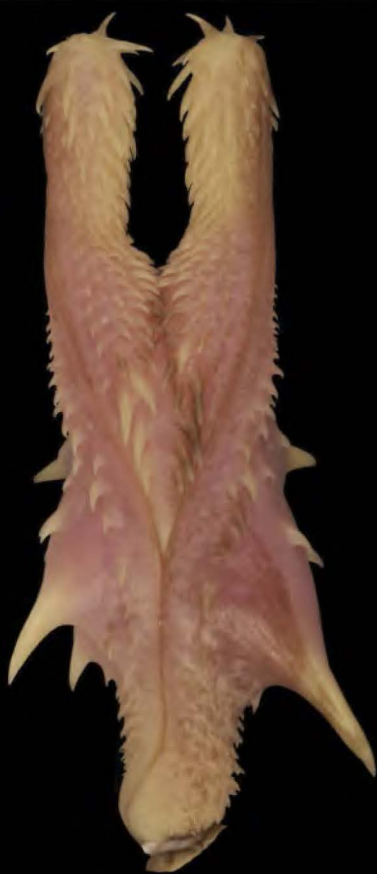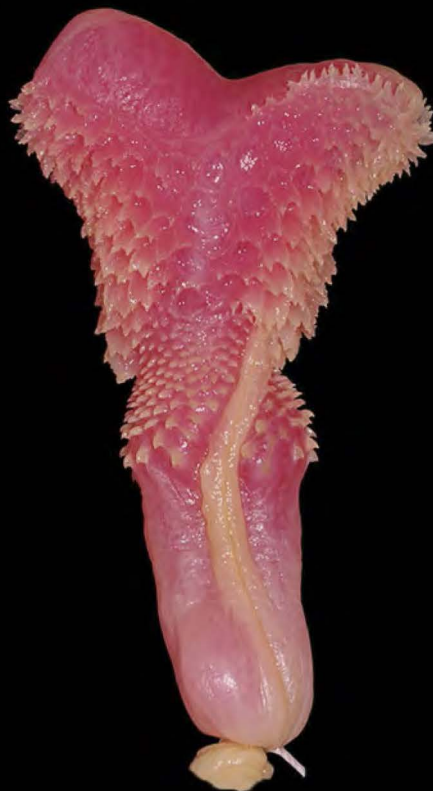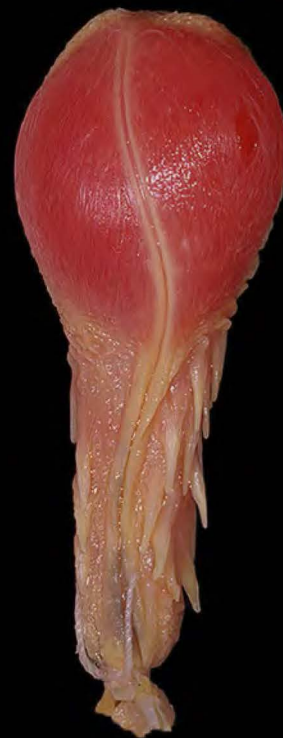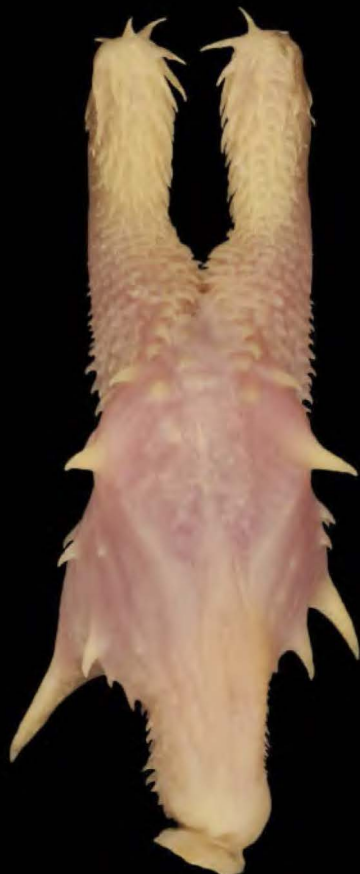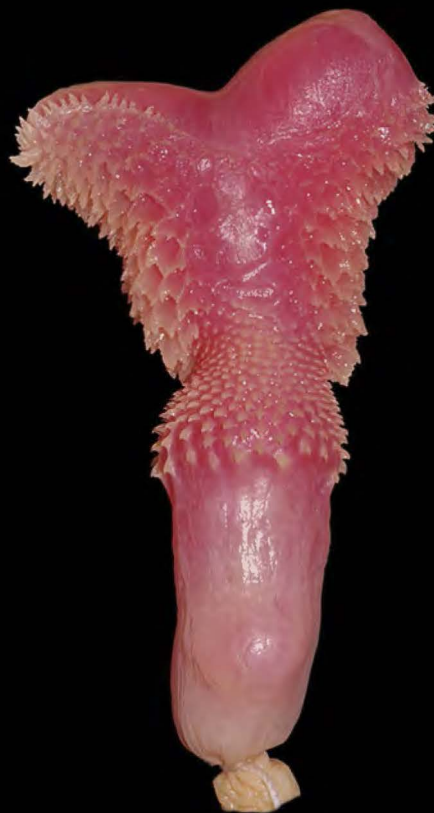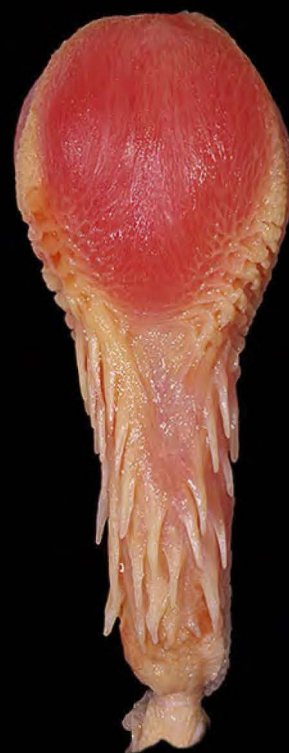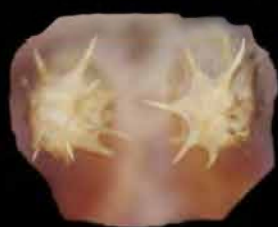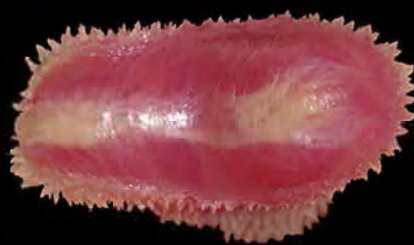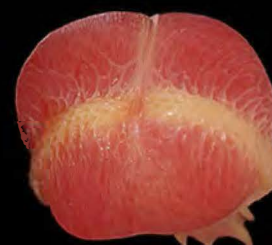

Fig. AB

Colubridae

*Dispholidus typus*

*Hierophis viridiflavus*

*Boiga pulverulenta*

Sulcate

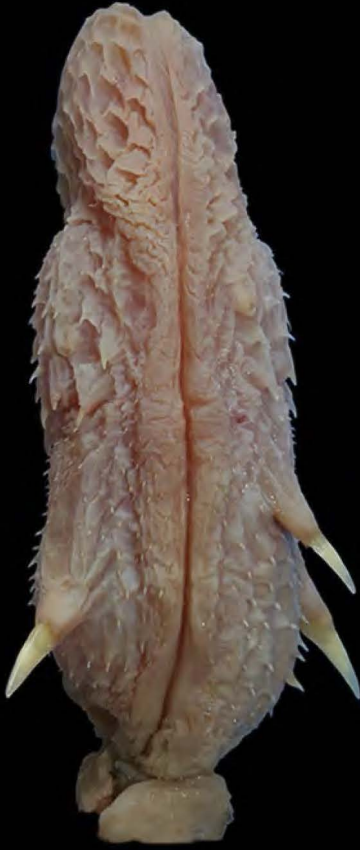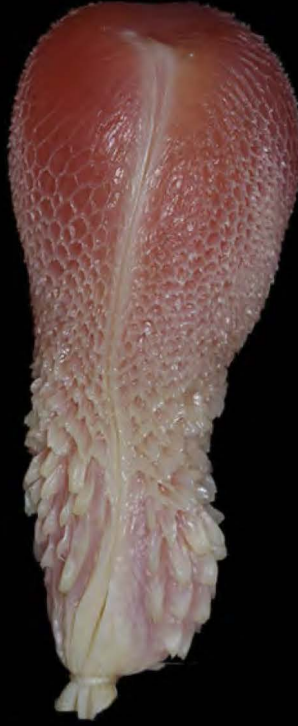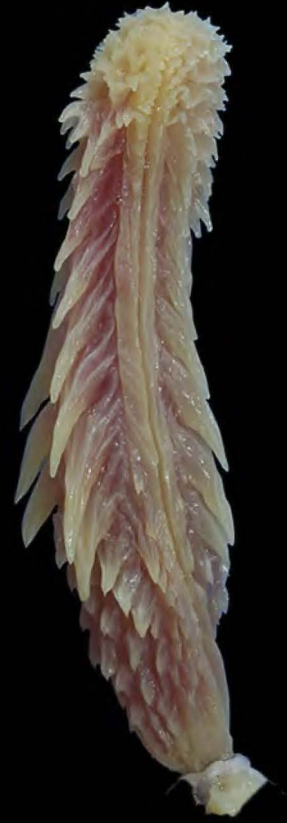

Asulcate

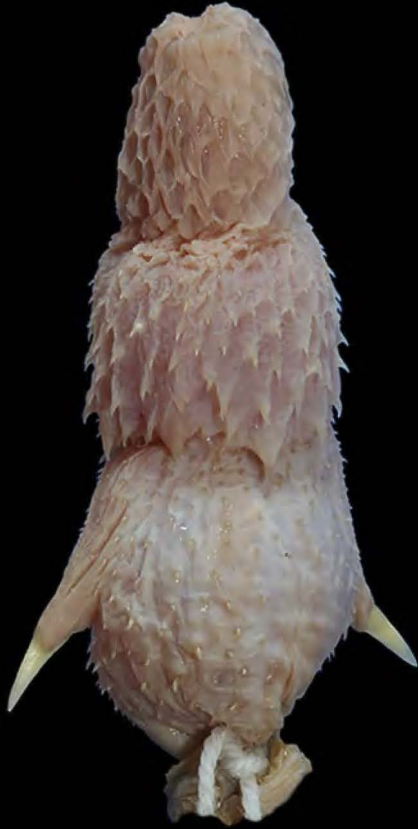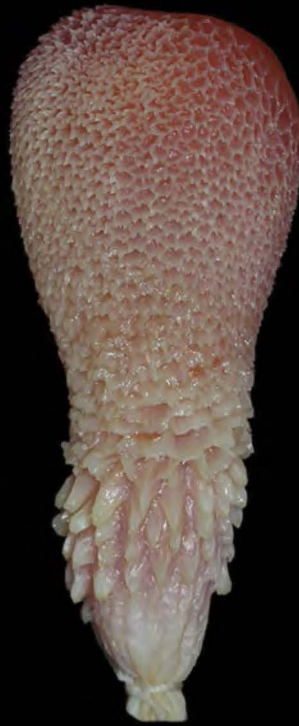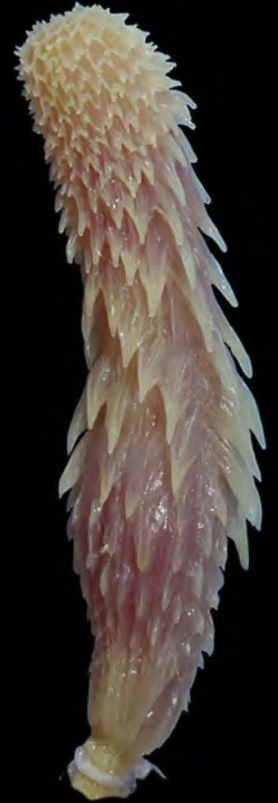

Apical

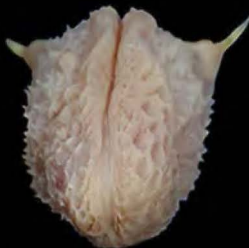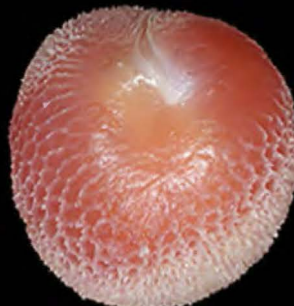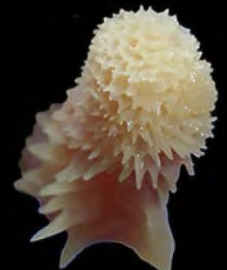

Fig. AC

Colubridae

*Ptyas korros*

*Gongylosoma baliodeirus*

*Liopeltis frenatus*

Sulcate

Asulcate

Apical

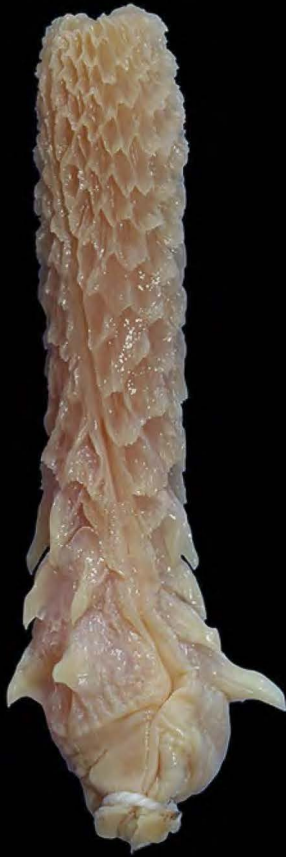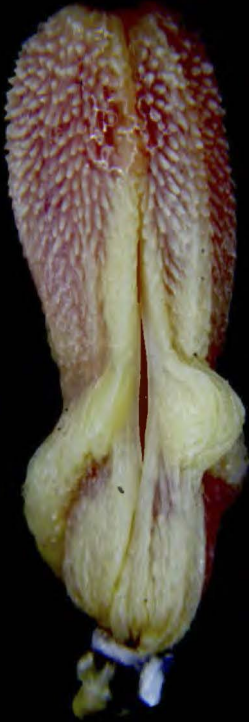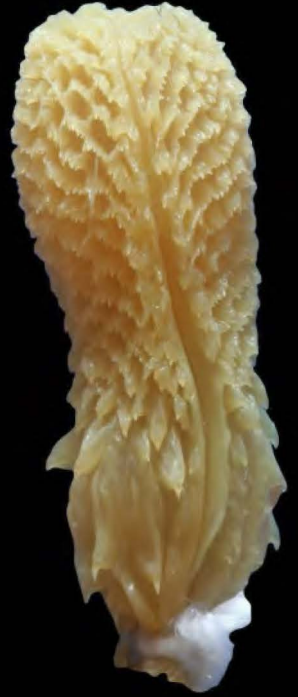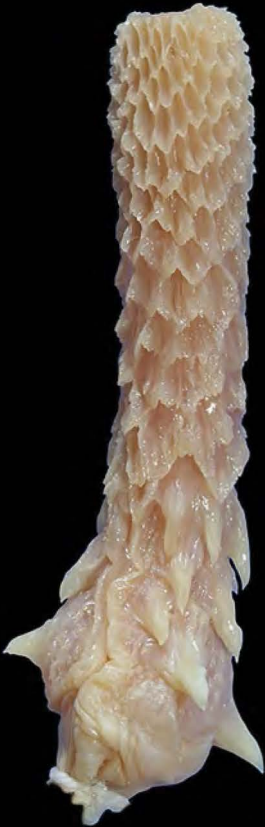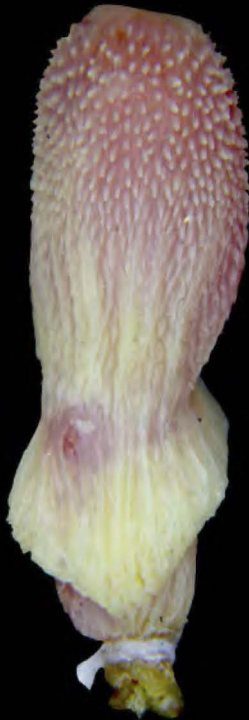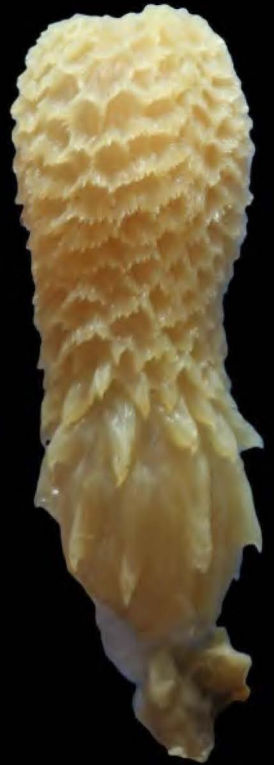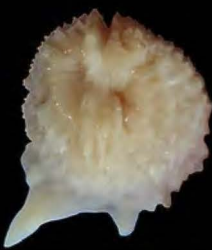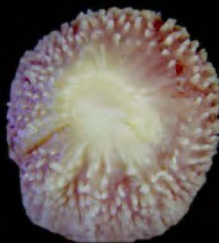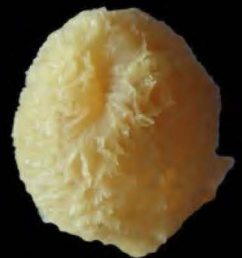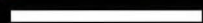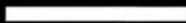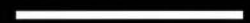

Fig. AD

Elapoidea *Incertae sedis*

*Buroma depressiceps*

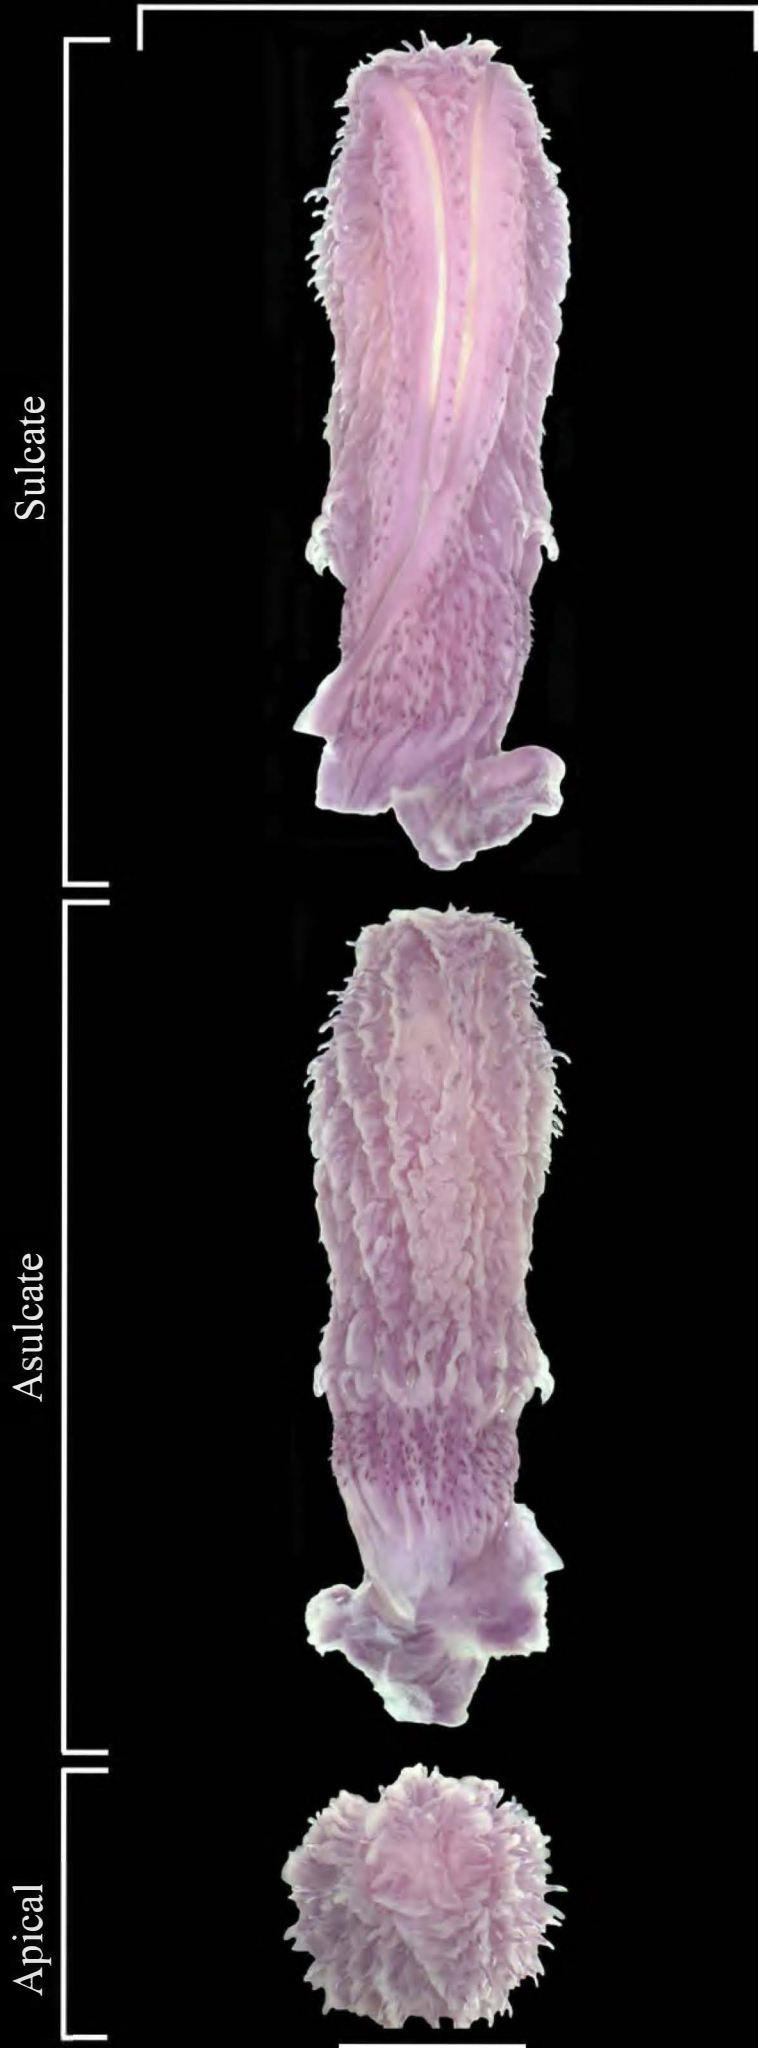

Supplement: pone.0216148.s017.pdf [file pone.0216148.s017.pdf]
