# Supplementary material for: Large-scale molecular phylogeny, morphology, divergence-time estimation, and the fossil record of advanced caenophidian snakes (Squamata: Serpentes)
Source: PubMed Central journal article supplement (PMC6512042; doi:10.1371/journal.pone.0216148), 2019-05-10
Supplement: pone.0216148.s013.pdf [file pone.0216148.s013.pdf]

TBE >70  
 SHL >70  
 FBP >70  
 ALL >70  
 ALL <70

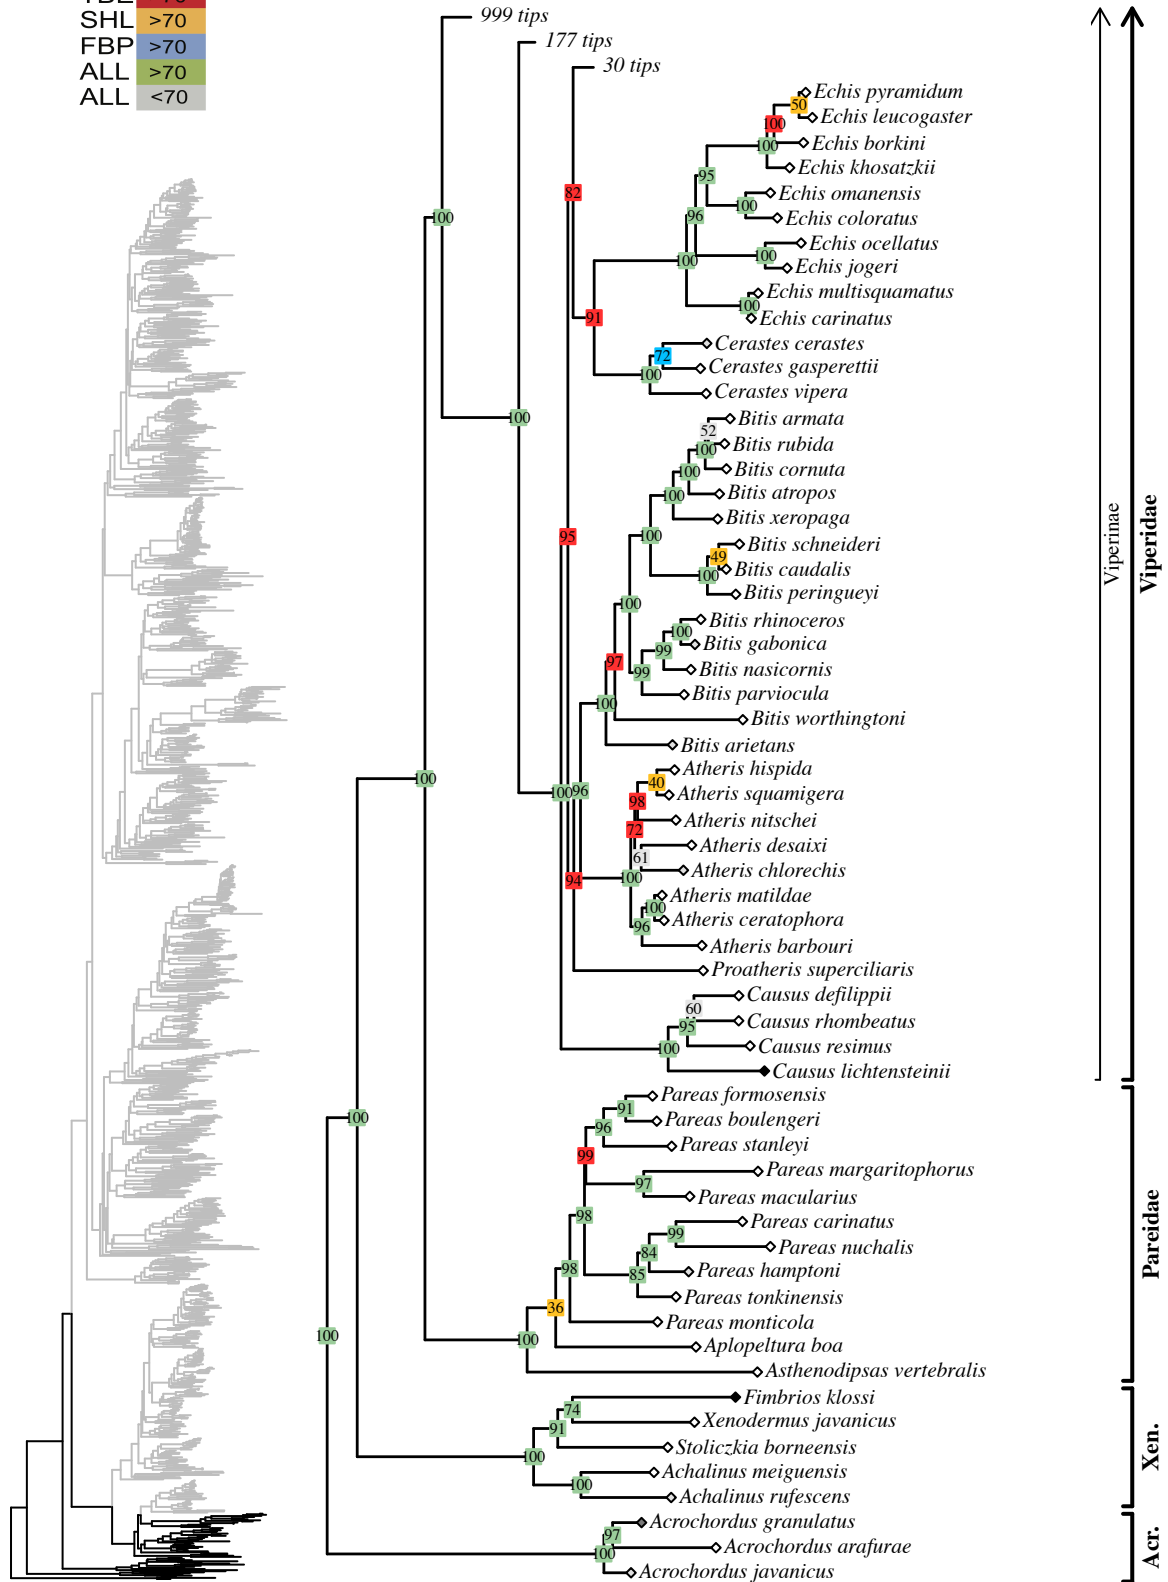

TBE >70  
 SHL >70  
 FBP >70  
 ALL >70  
 ALL <70

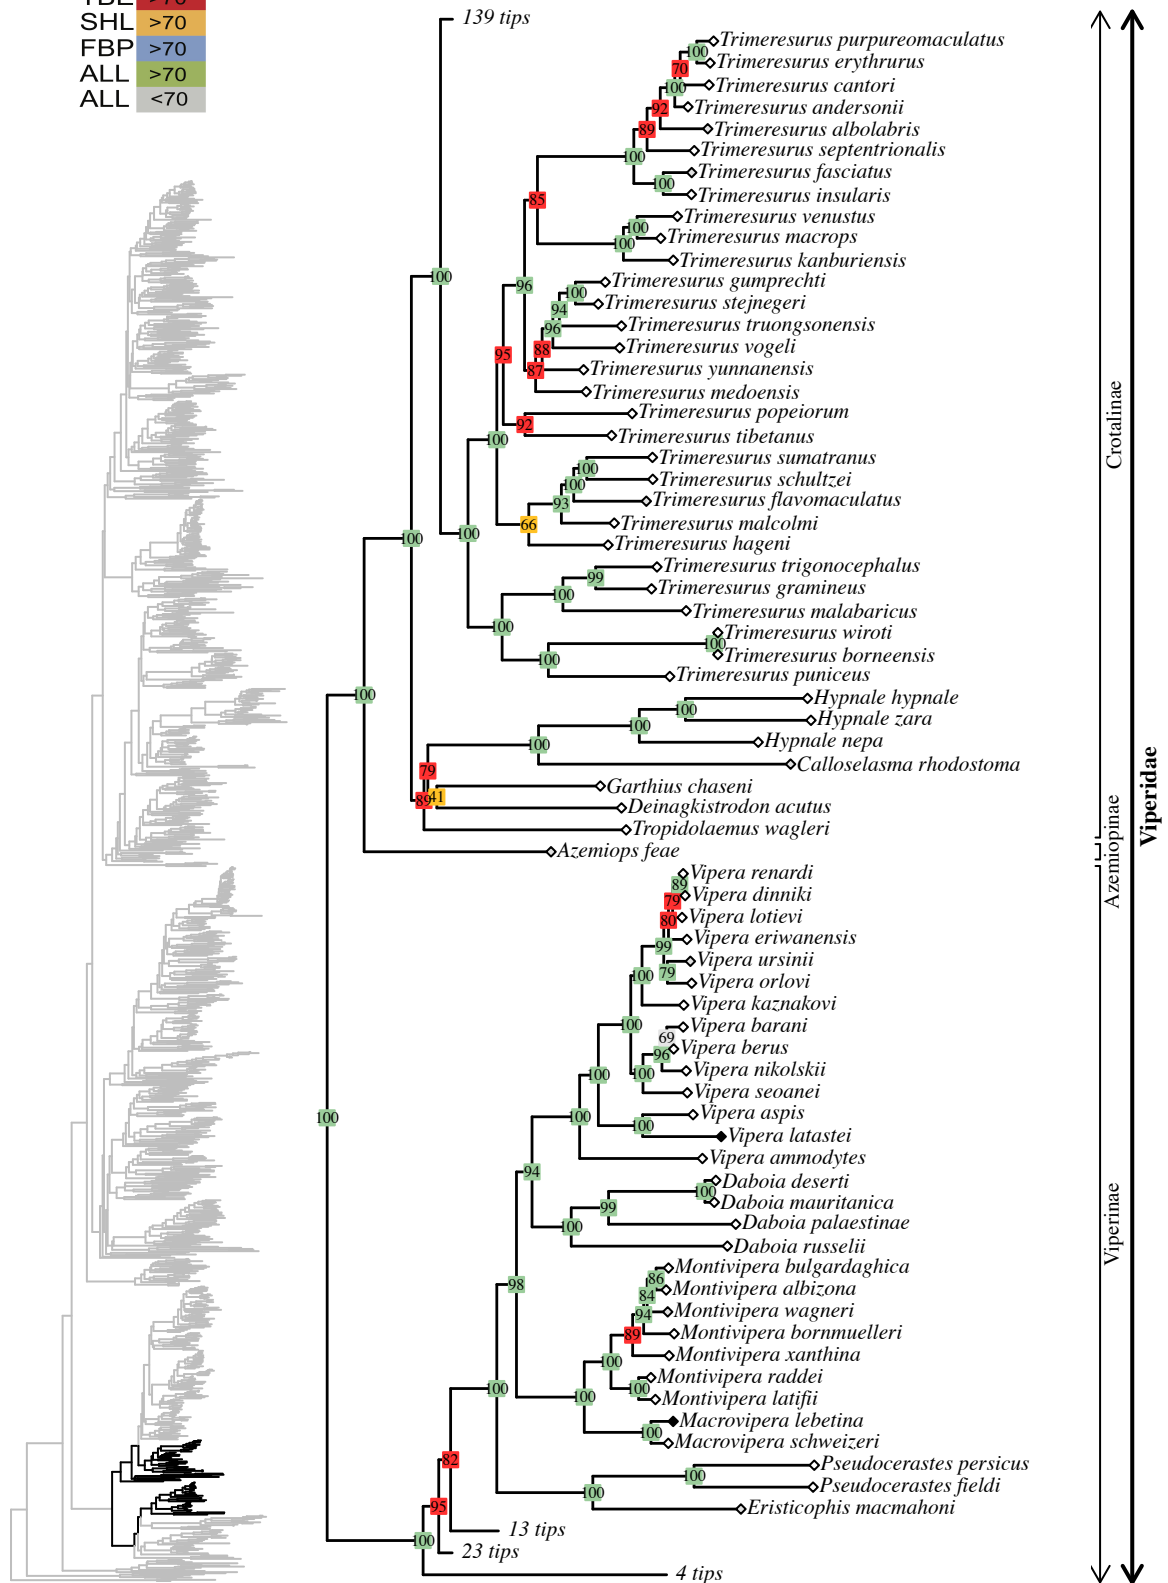

TBE >70  
 SHL >70  
 FBP >70  
 ALL >70  
 ALL <70

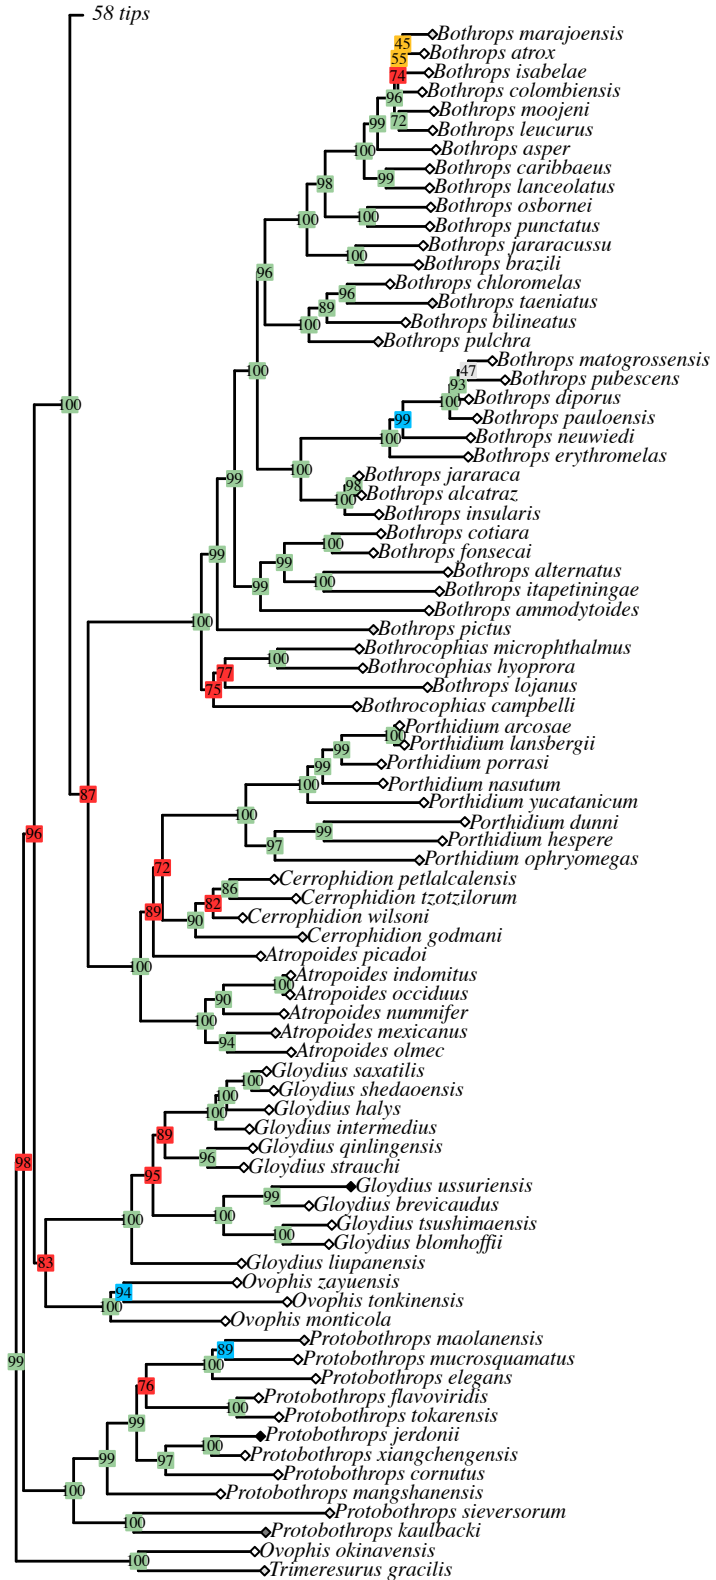

Crotalinae  
 Viperidae

TBE >70  
 SHL >70  
 FBP >70  
 ALL >70  
 ALL <70

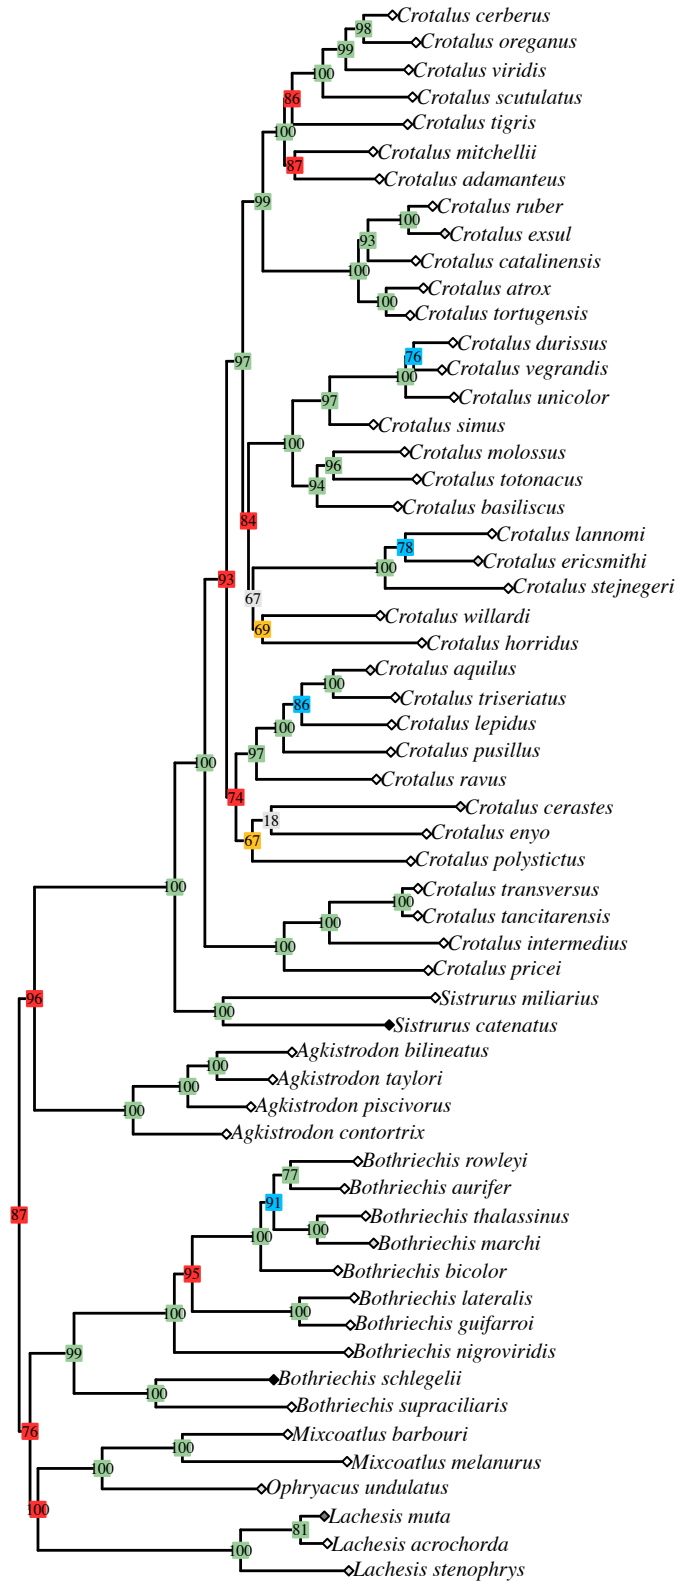

Crotalinae  
 Viperidae

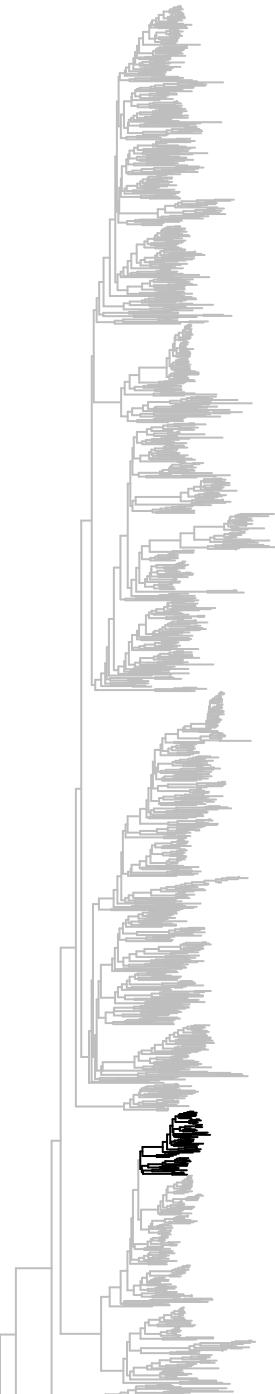

TBE >70  
 SHL >70  
 FBP >70  
 ALL >70  
 ALL <70

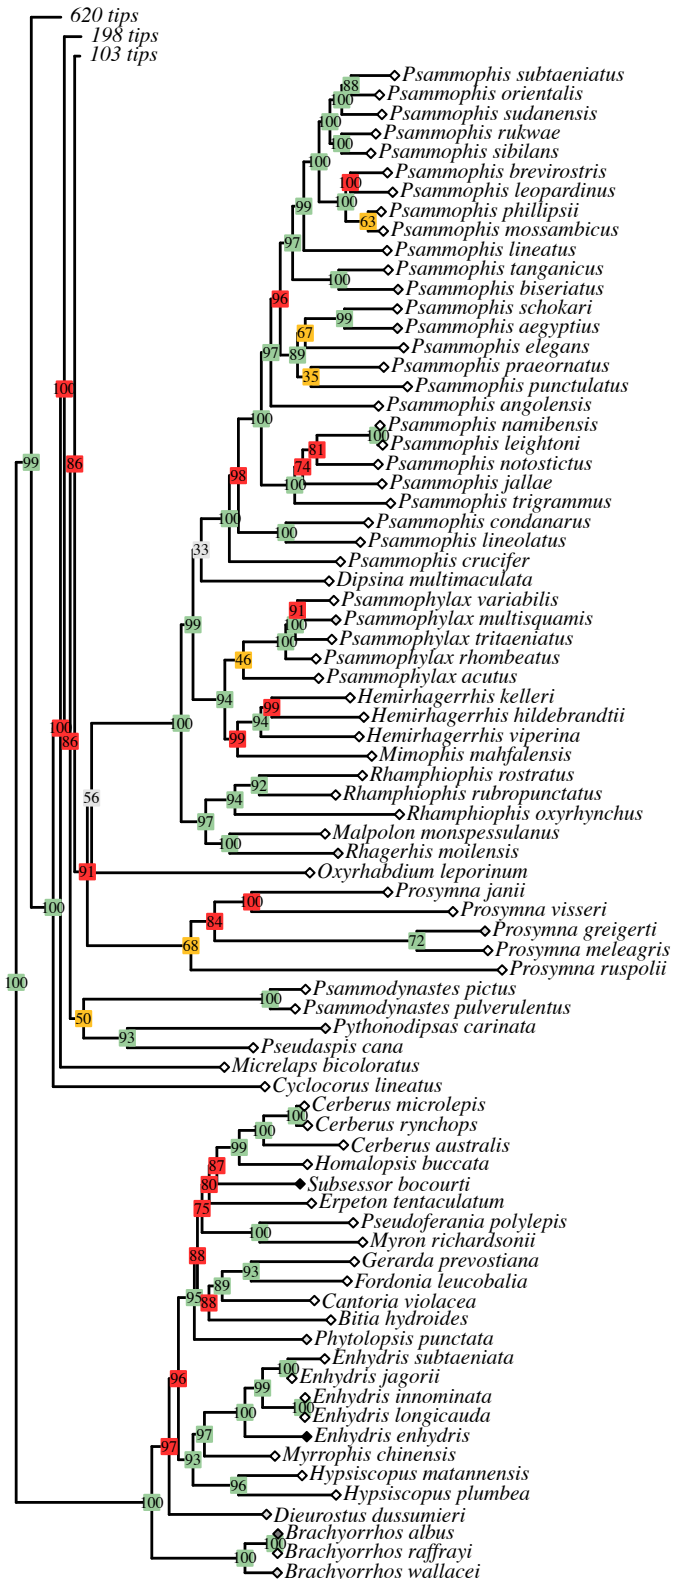

Psammophiidae

Pseudoscorpionidae

Homalopsidae

TBE >70  
 SHL >70  
 FBP >70  
 ALL >70  
 ALL <70

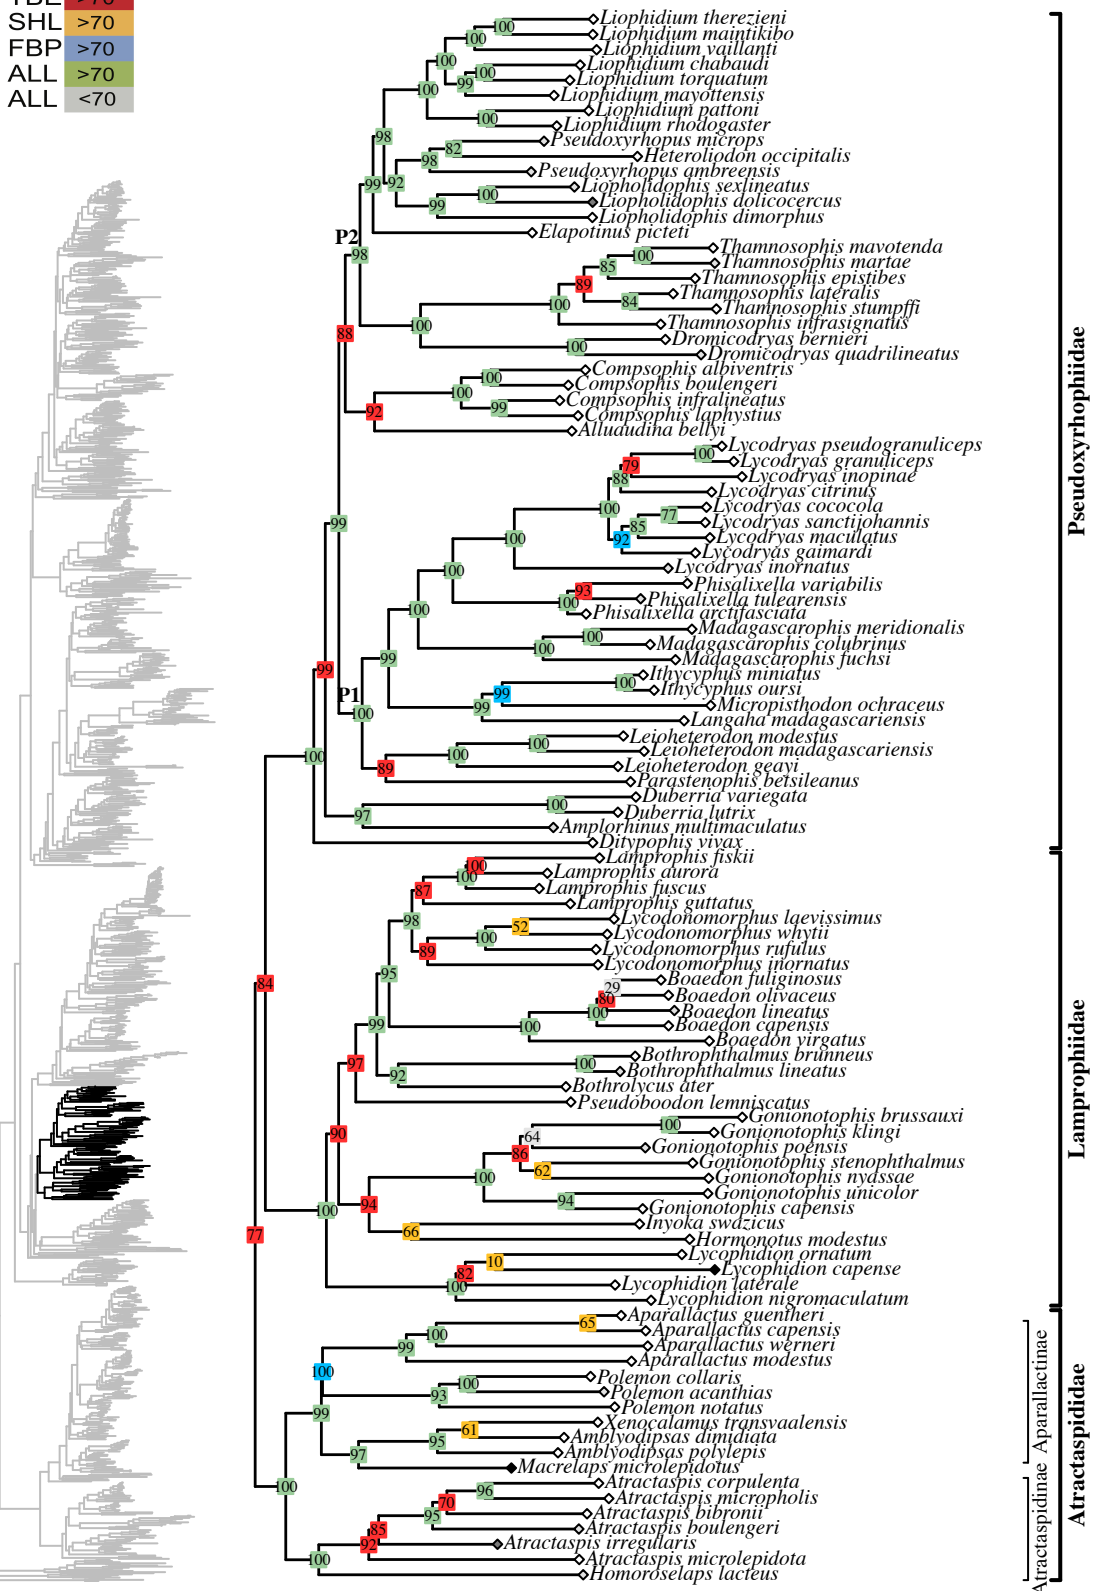

|     |     |
|-----|-----|
| TBE | >70 |
| SHL | >70 |
| FBP | >70 |
| ALL | >70 |
| ALL | <70 |

121 tips

E3

E2

E1

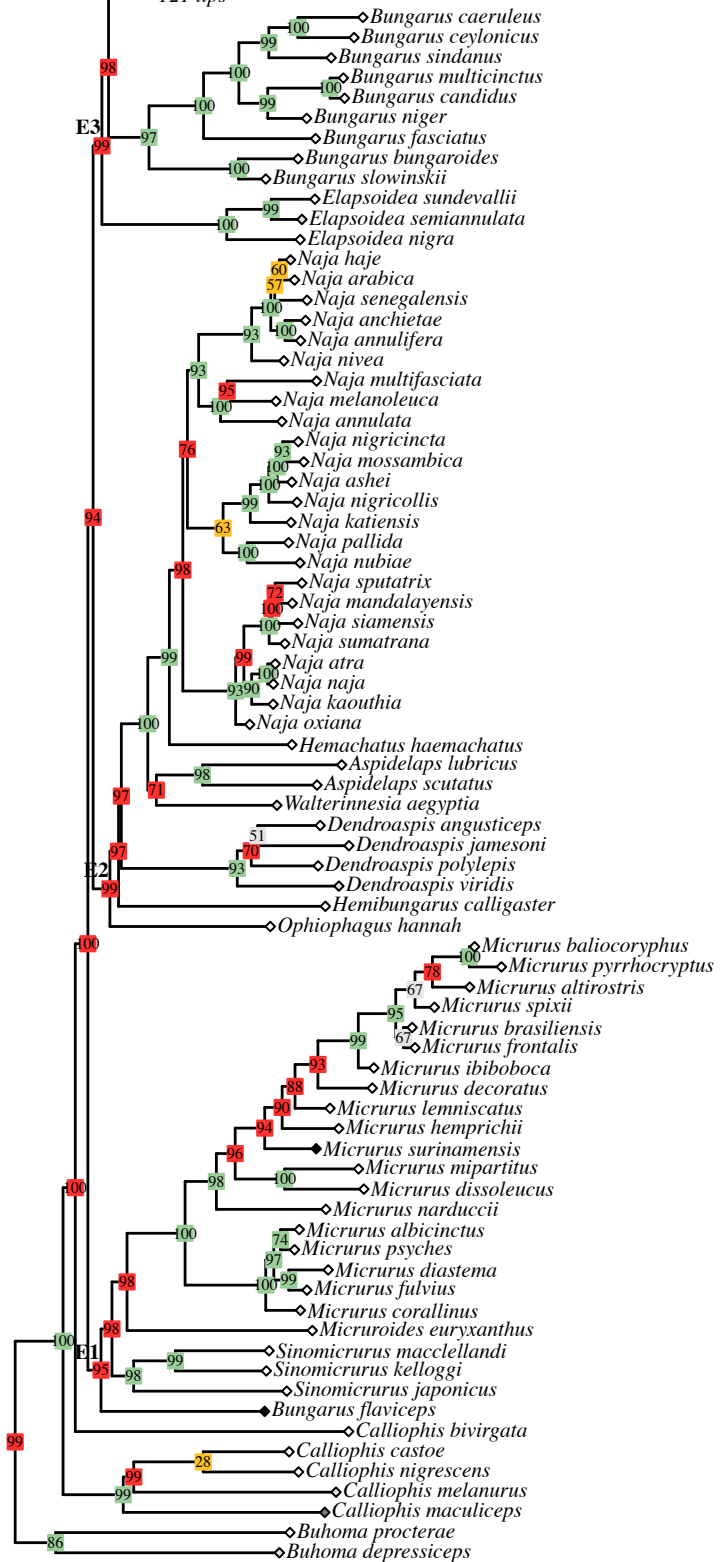

Elapidae

TBE >70  
 SHL >70  
 FBP >70  
 ALL >70  
 ALL <70

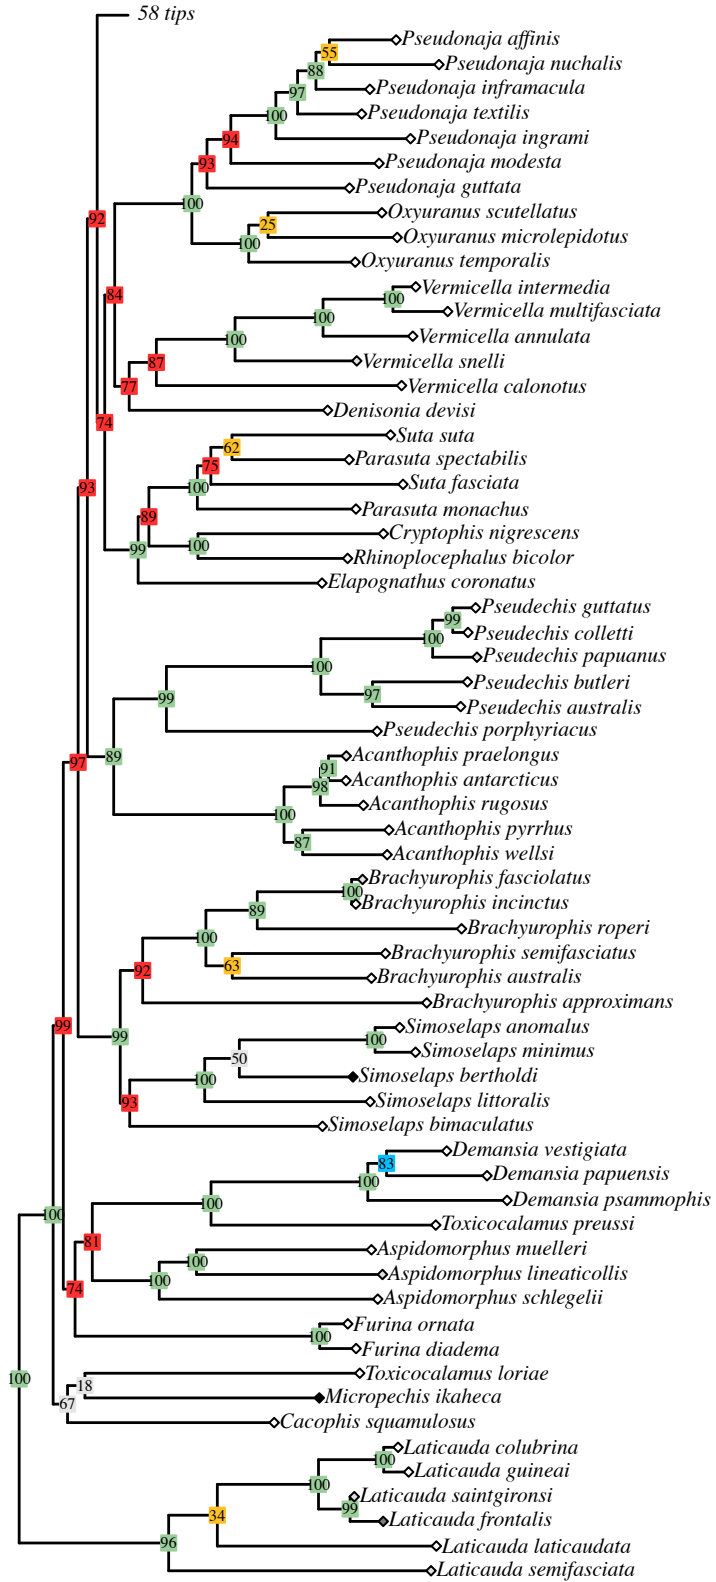

Hydrophiinae  
 Elapidae

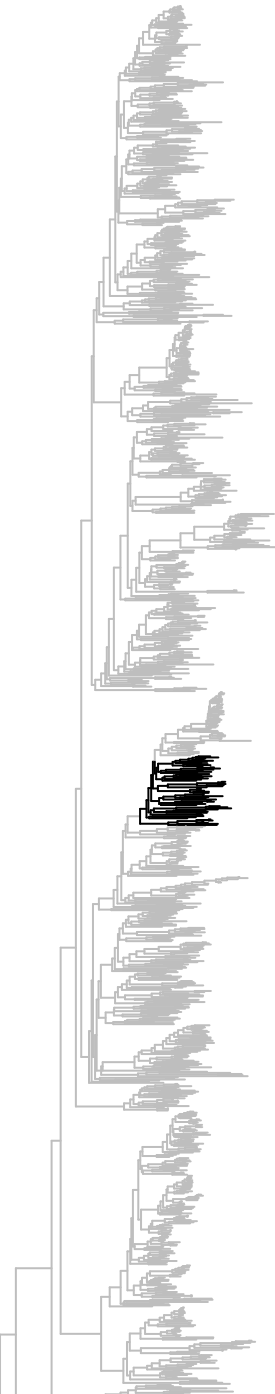



TBE >70  
 SHL >70  
 FBP >70  
 ALL >70  
 ALL <70

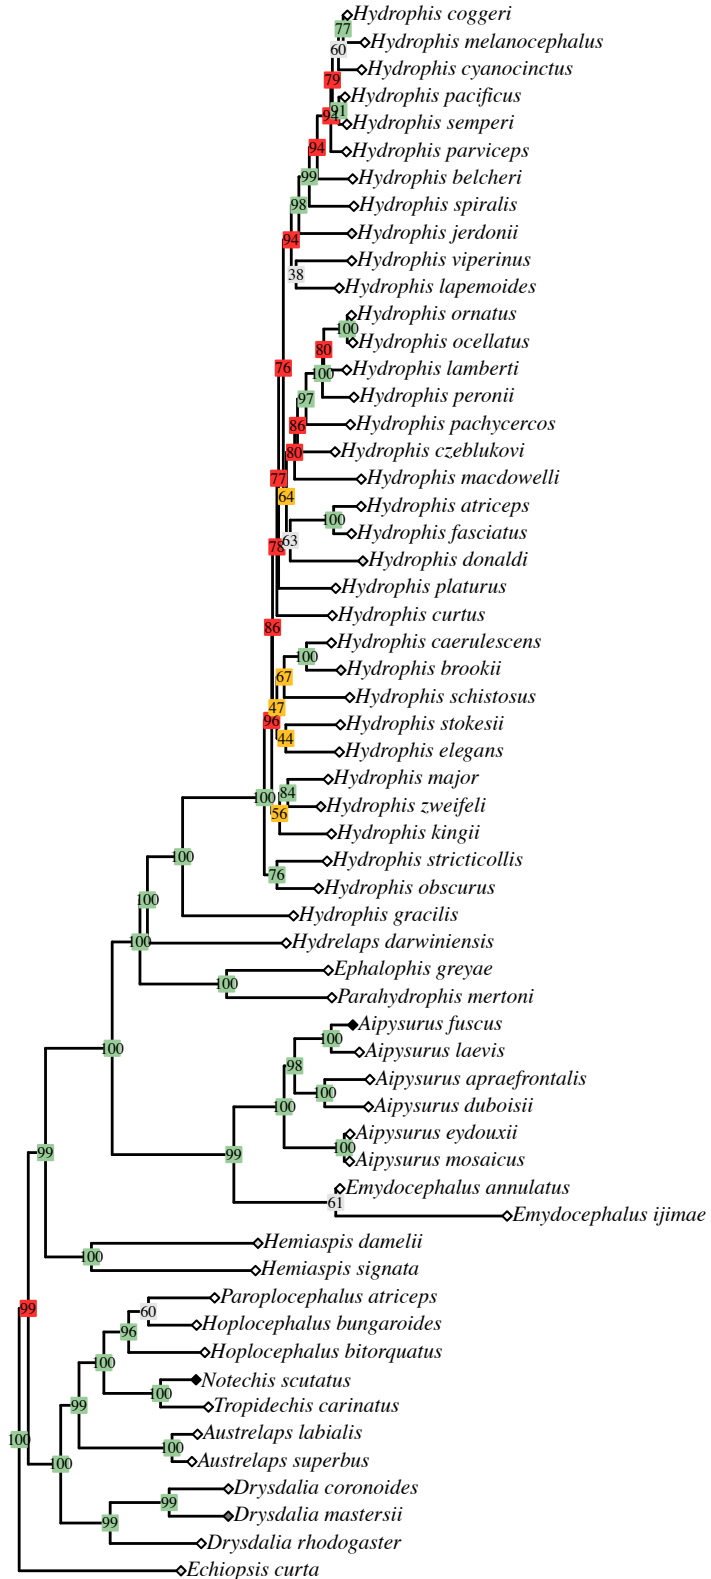

Hydrophiinae  
 Elapidae

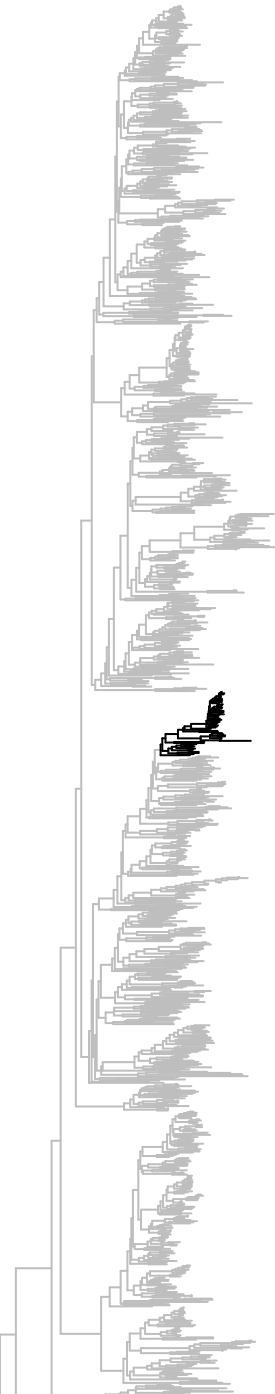

TBE >70  
 SHL >70  
 FBP >70  
 ALL >70  
 ALL <70

161 tips

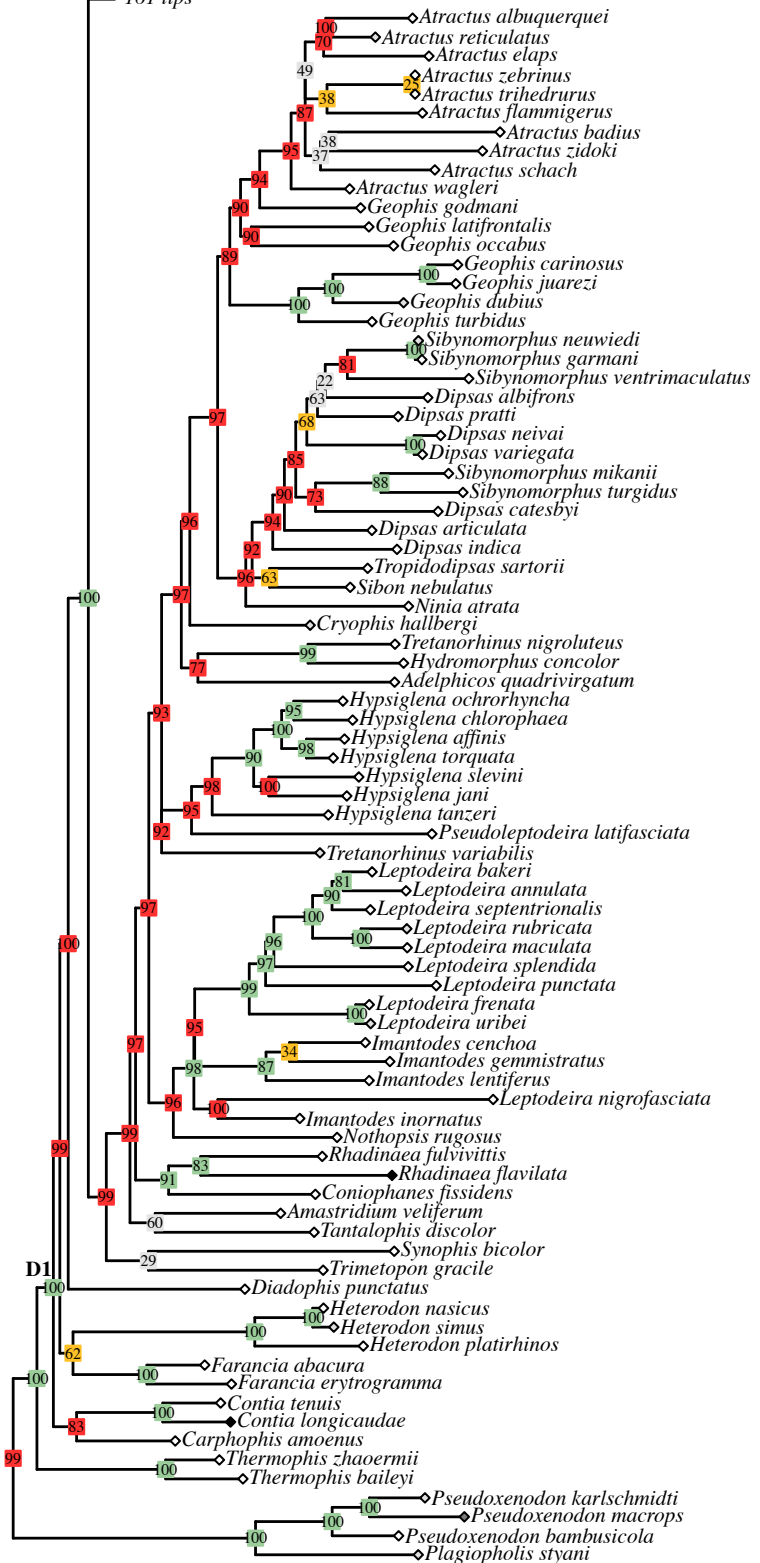

Dipsadinae

Dipsadidae

Carphophinae

Pseudo.

TBE >70  
 SHL >70  
 FBP >70  
 ALL >70  
 ALL <70

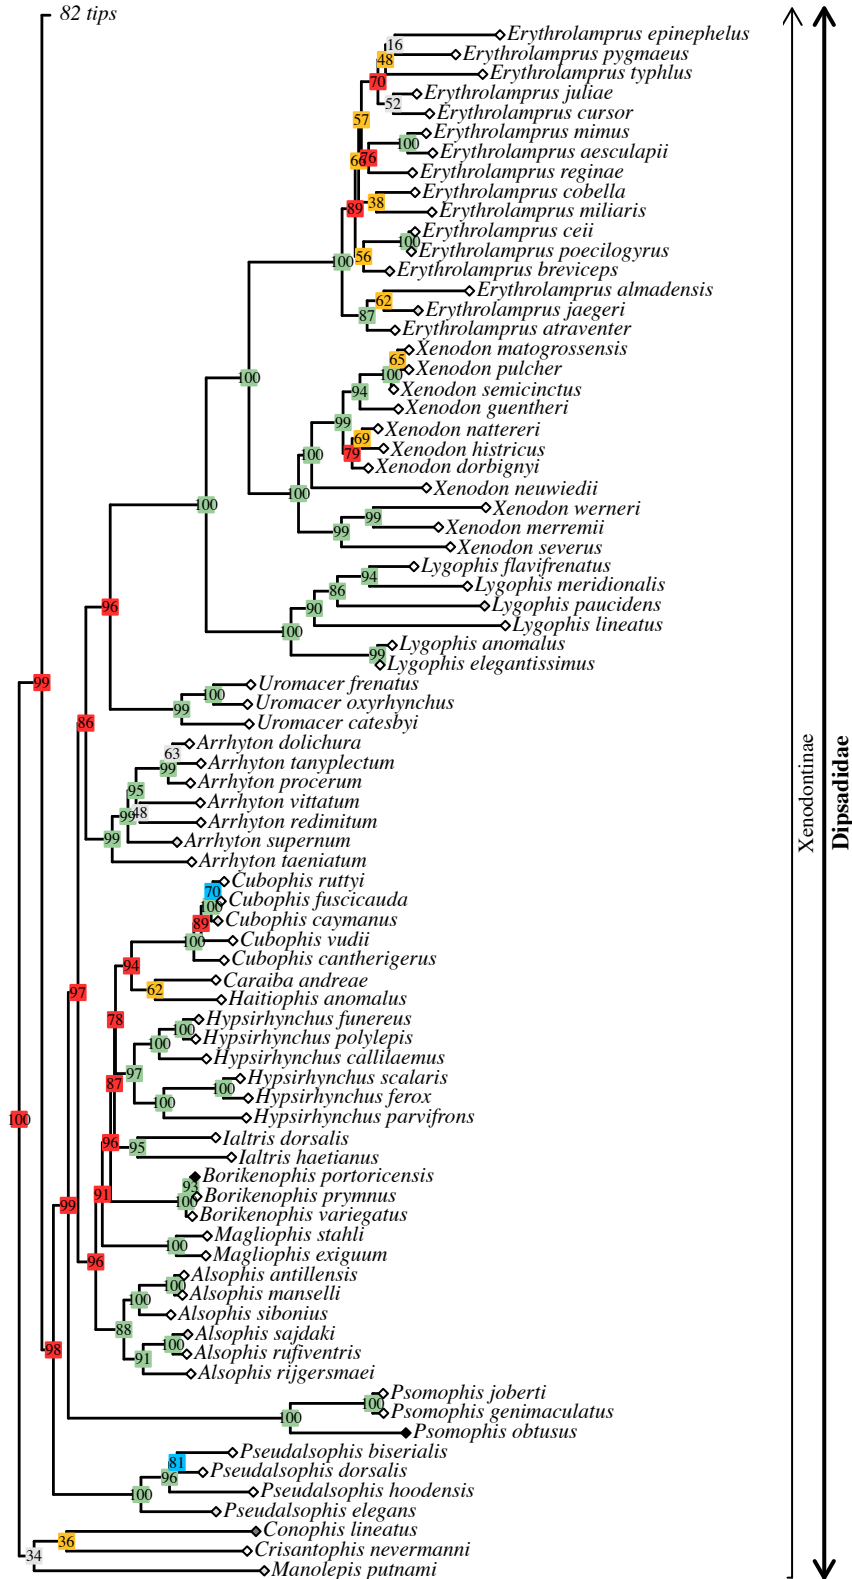

TBE >70  
 SHL >70  
 FBP >70  
 ALL >70  
 ALL <70

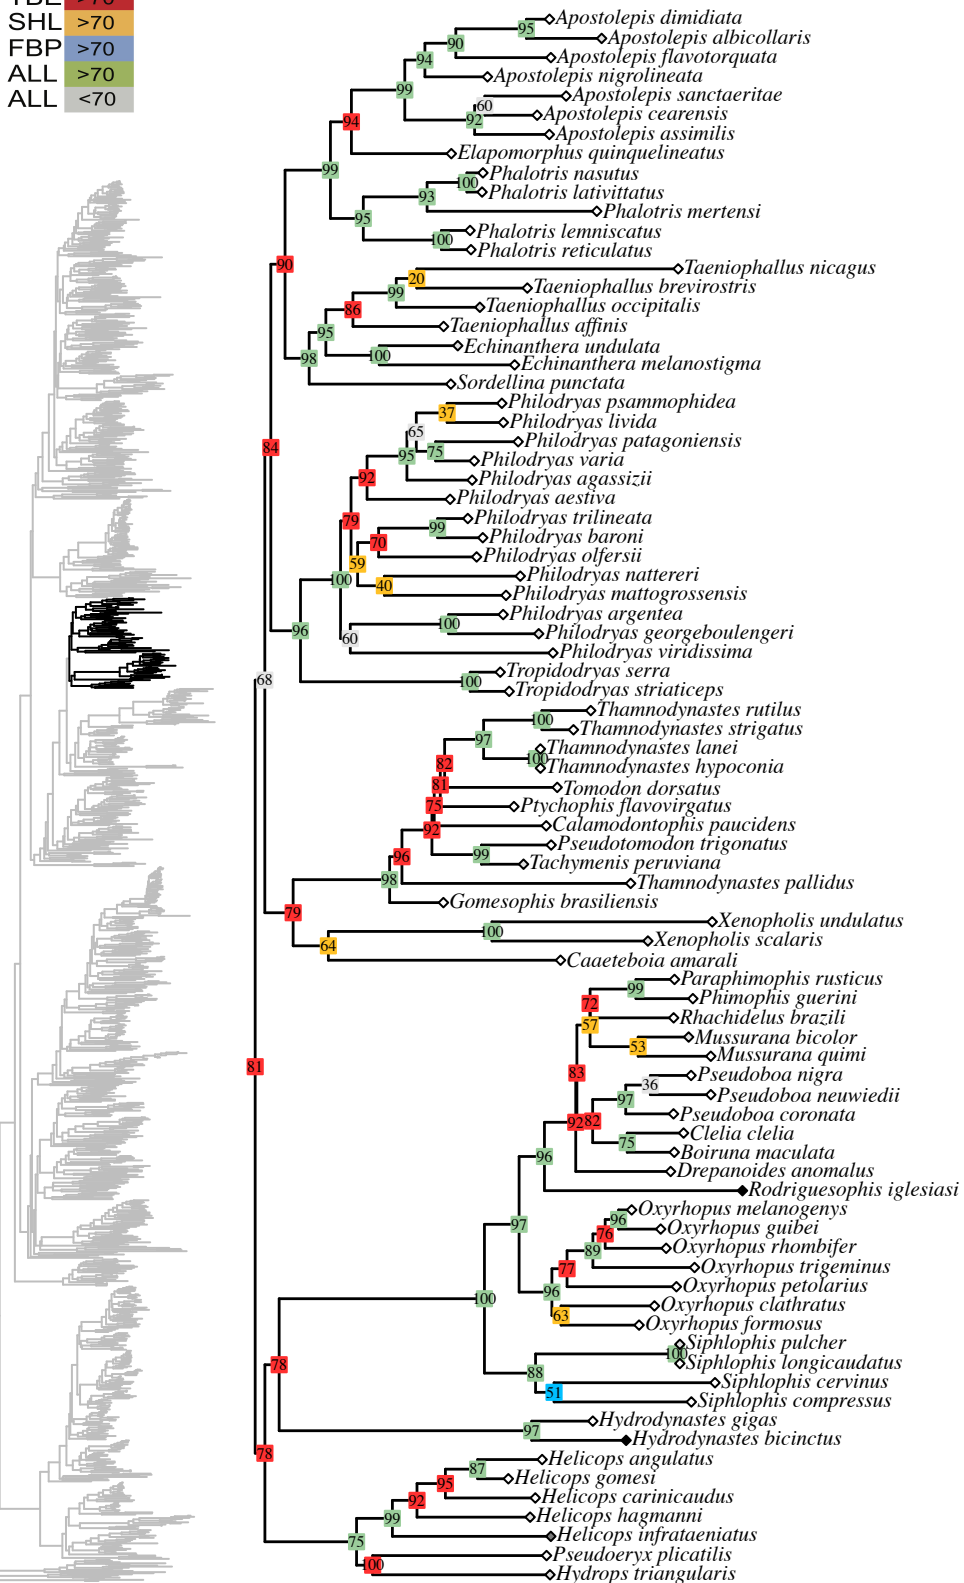

Xenodontinae  
 Dipsadidae

TBE >70  
 SHL >70  
 FBP >70  
 ALL >70  
 ALL <70

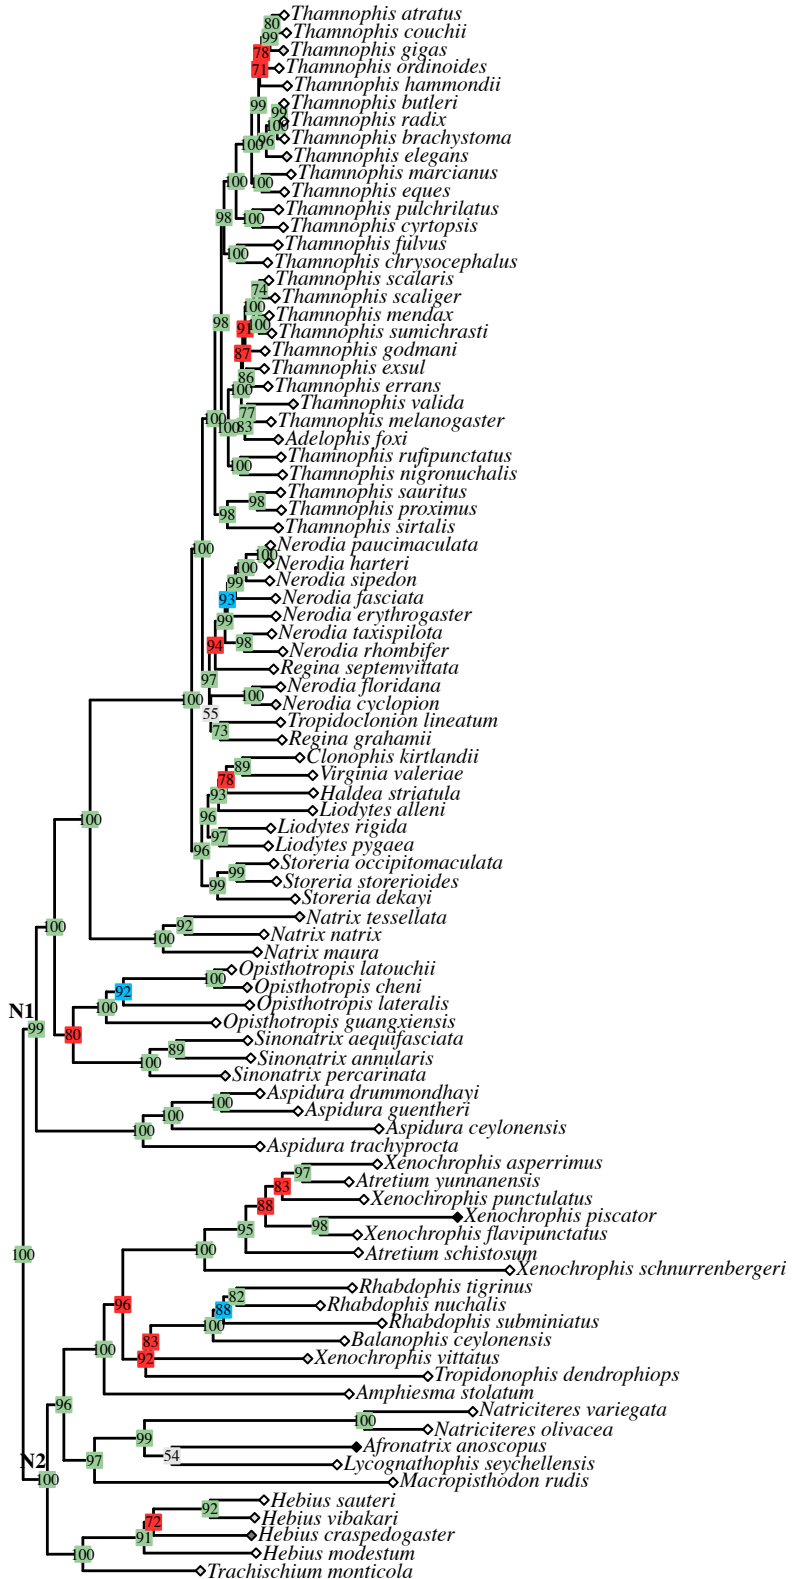

Natricidae

TBE >70  
 SHL >70  
 FBP >70  
 ALL >70  
 ALL <70

199 tips

Colubridae

Sib. Cal. Gra.

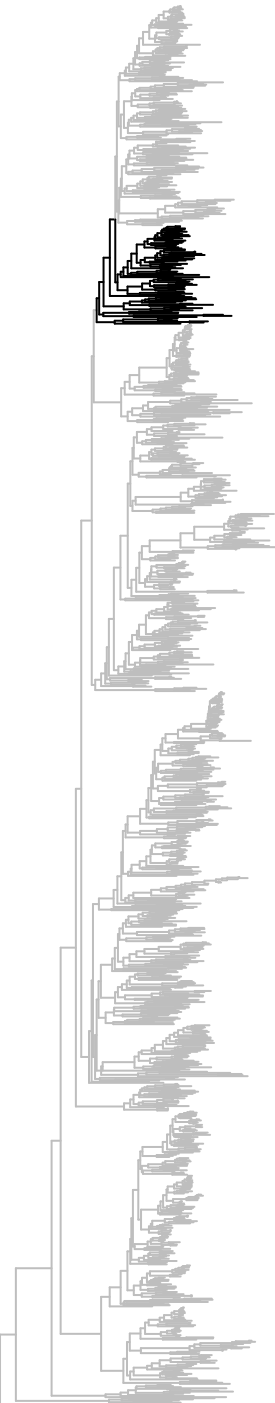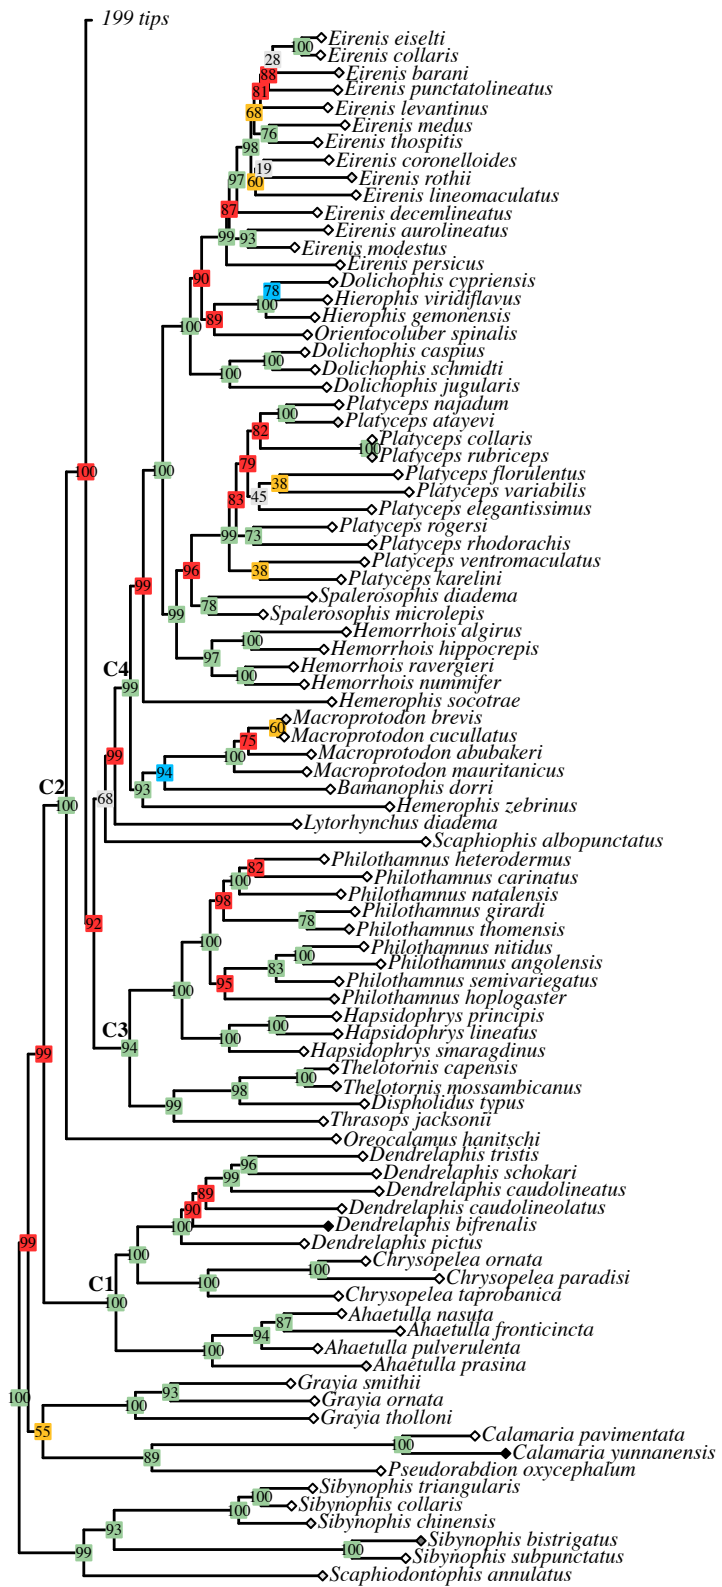

TBE >70  
 SHL >70  
 FBP >70  
 ALL >70  
 ALL <70

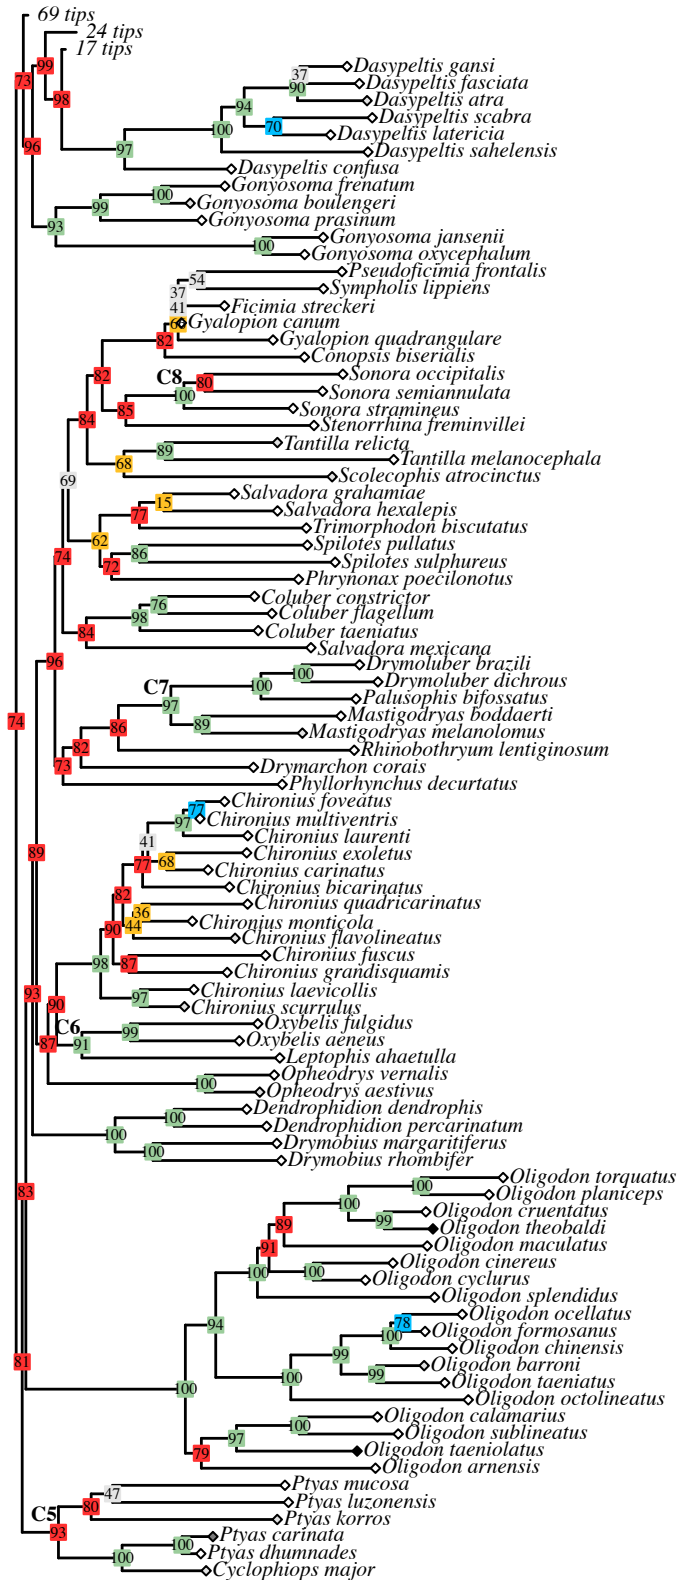

Colubridae

TBE >70  
 SHL >70  
 FBP >70  
 ALL >70  
 ALL <70

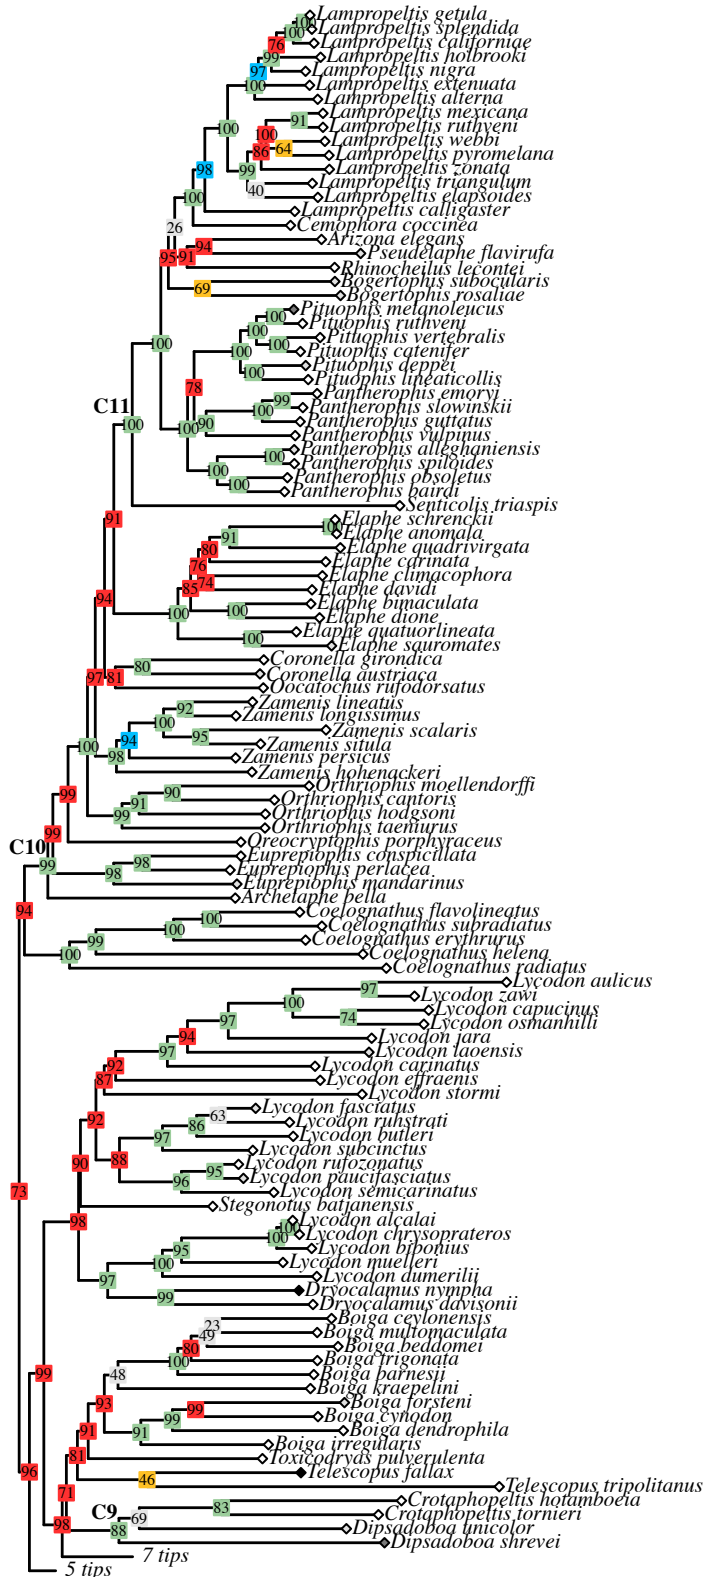

Colubridae

5 tips 7 tips
