# Supplementary material for: Large-scale molecular phylogeny, morphology, divergence-time estimation, and the fossil record of advanced caenophidian snakes (Squamata: Serpentes)
Source: PubMed Central journal article supplement (PMC6512042; doi:10.1371/journal.pone.0216148), 2019-05-10

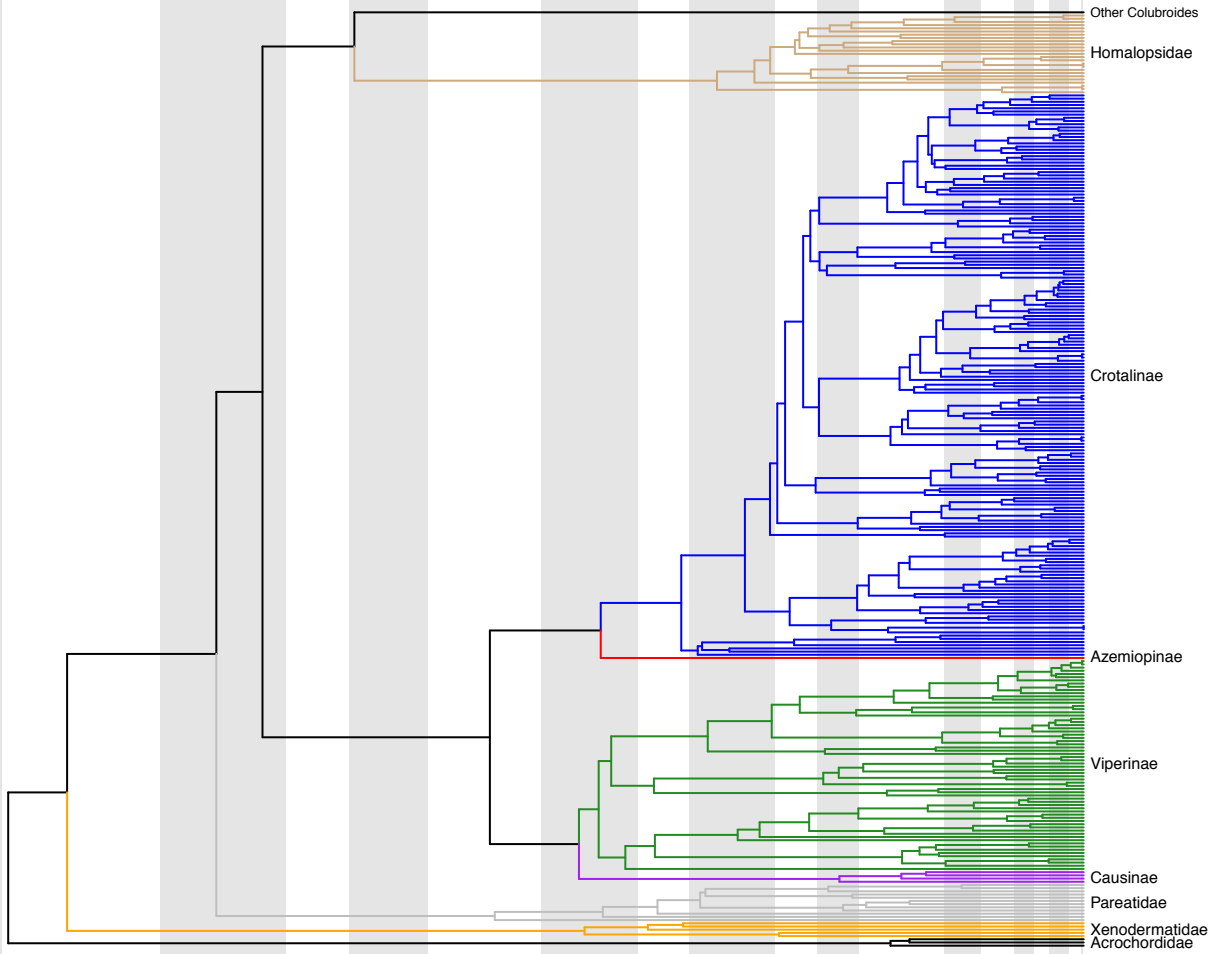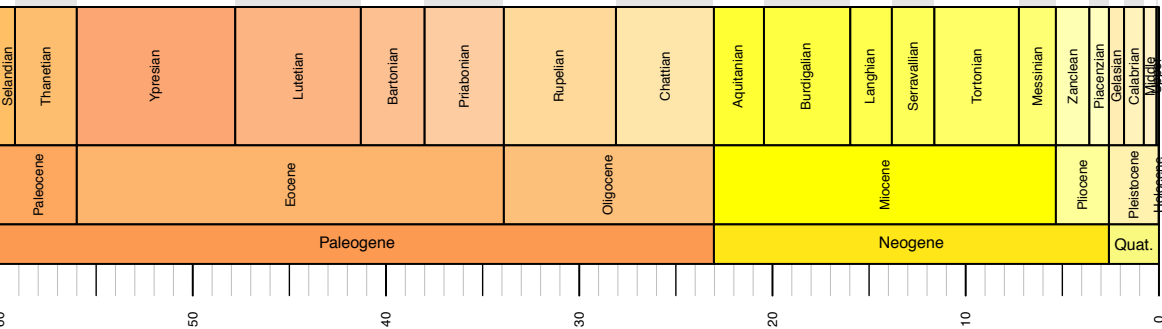

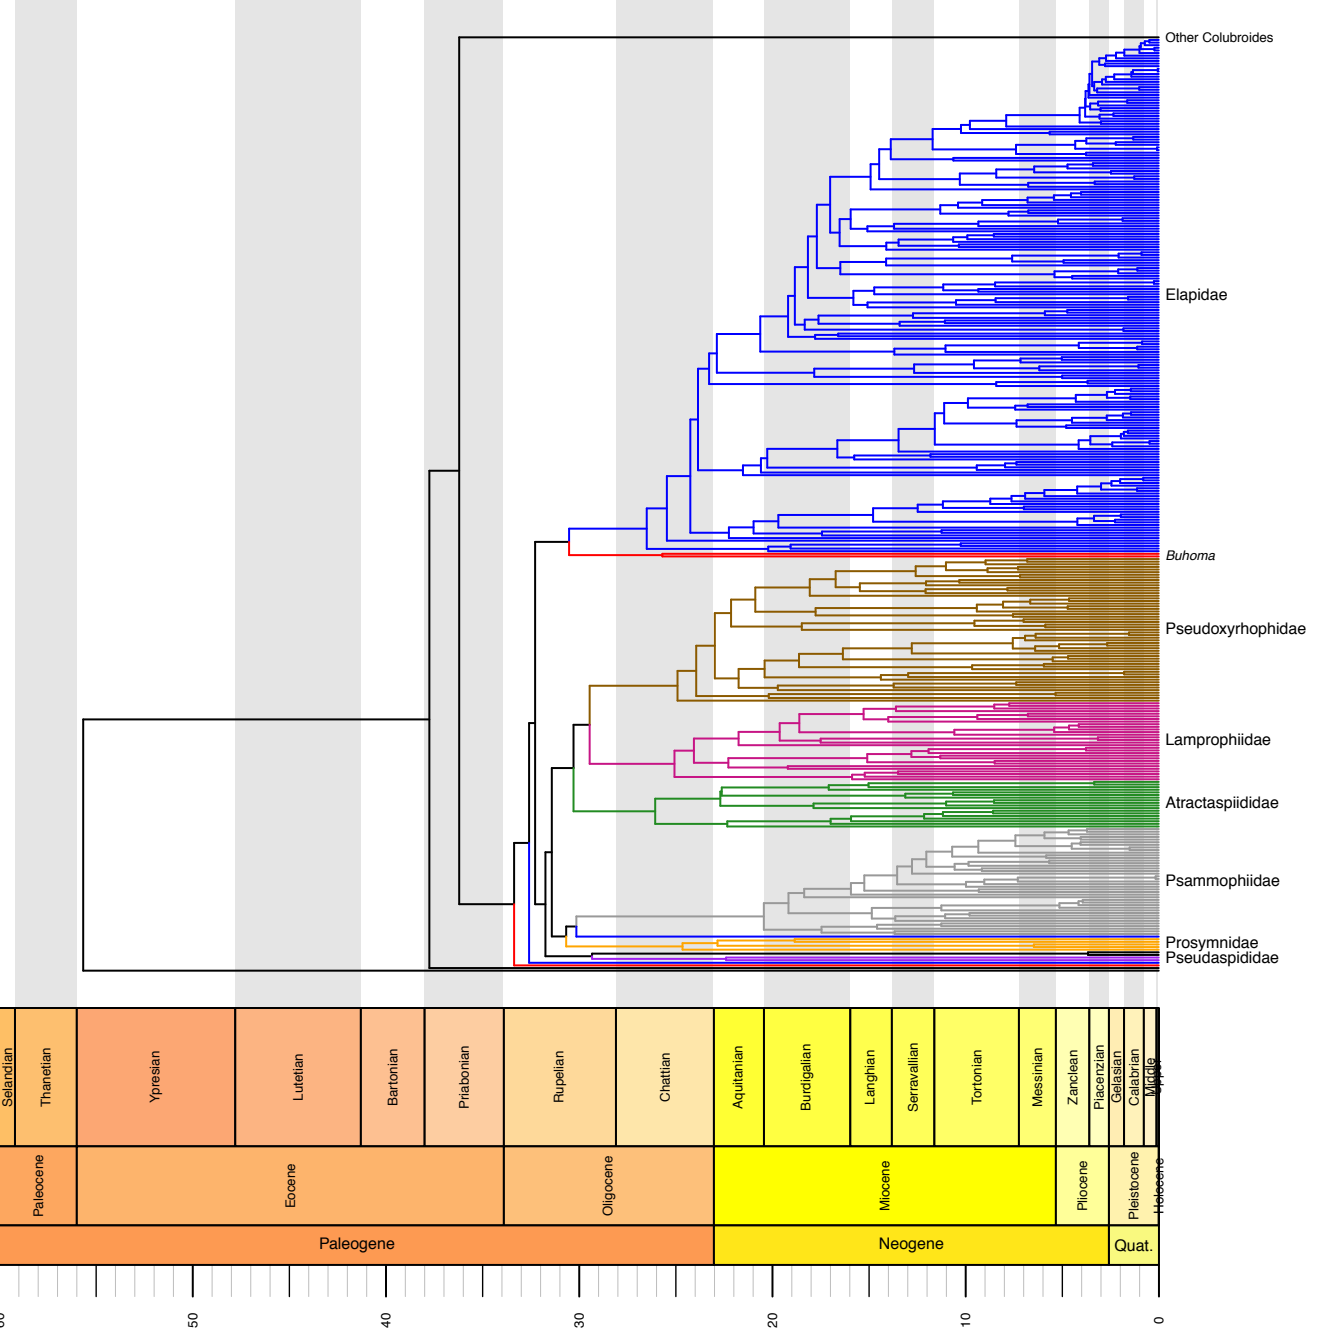

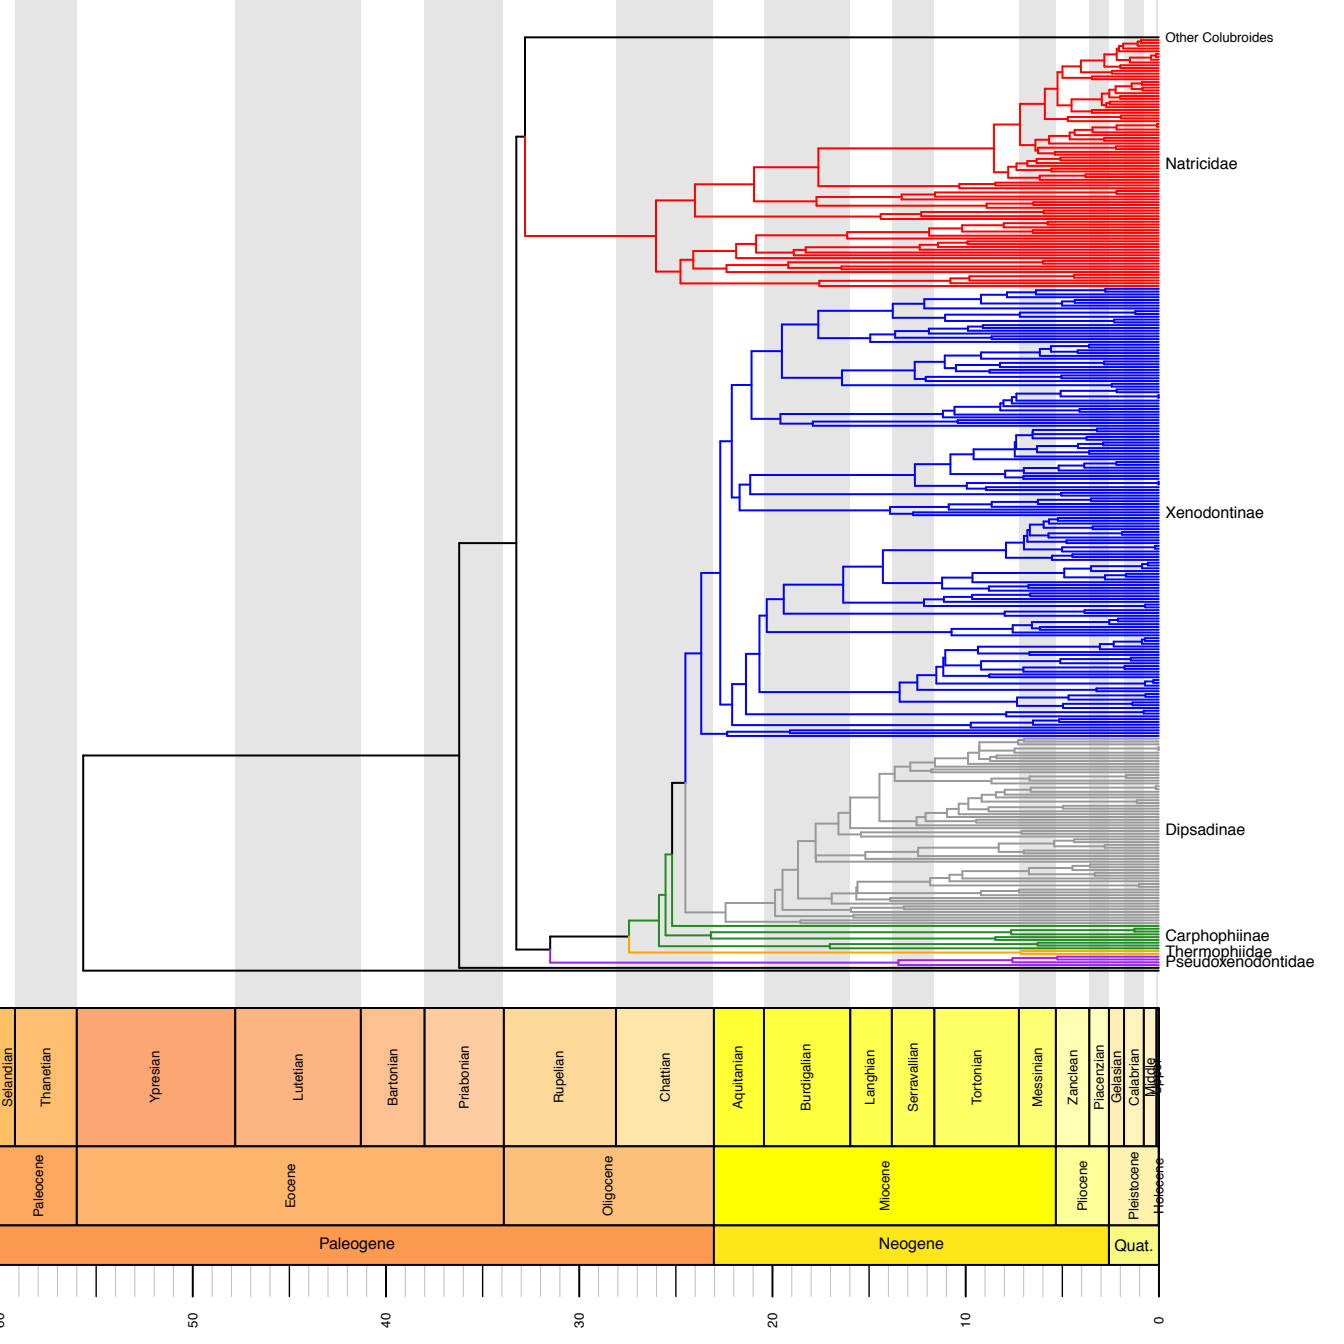

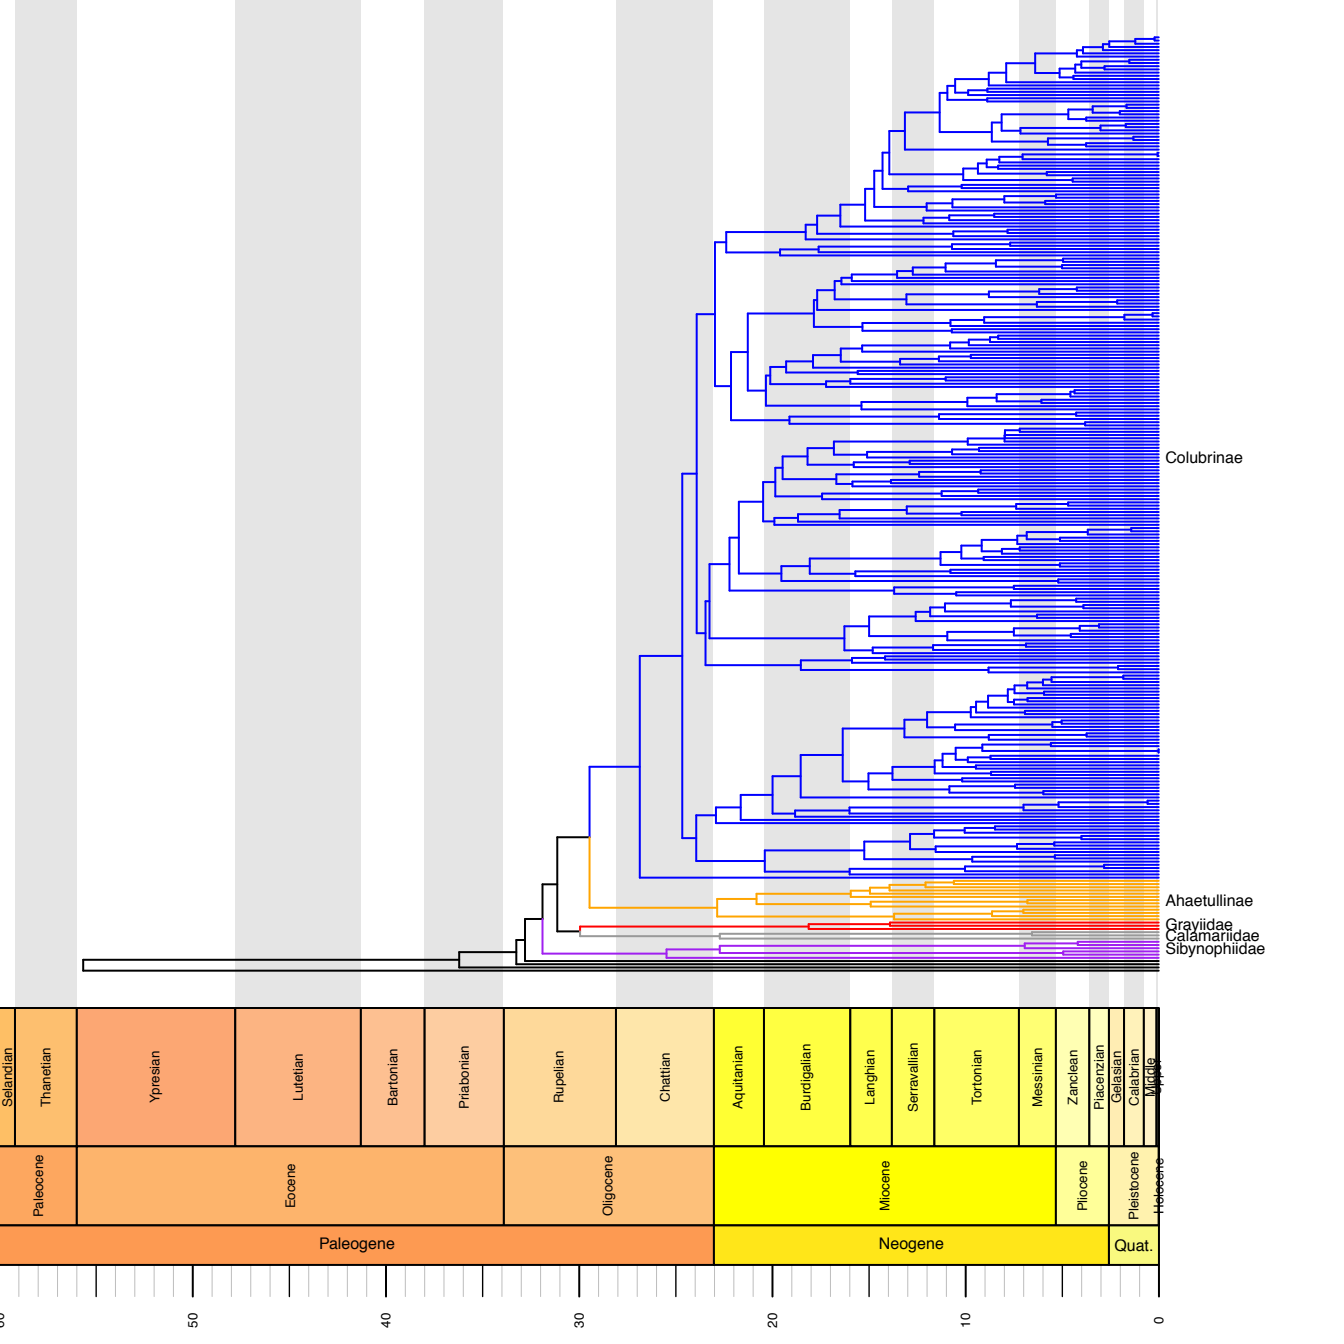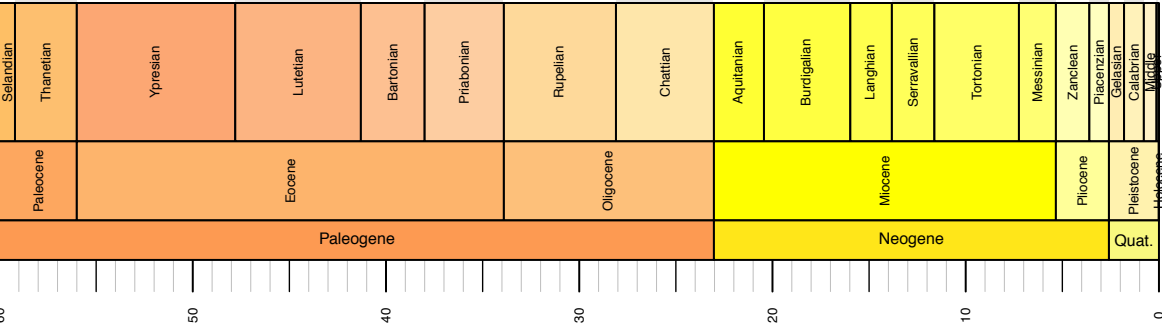

Supplement: pone.0216148.s014.pdf [file pone.0216148.s014.pdf]
