# Supplementary material for: Large-scale molecular phylogeny, morphology, divergence-time estimation, and the fossil record of advanced caenophidian snakes (Squamata: Serpentes)
Source: PLoS One. 2019 May 10;14(5):e0216148. doi: 10.1371/journal.pone.0216148 (PMC6512042; doi:10.1371/journal.pone.0216148)
Supplement: S9 Table — Clade support values based on the combination of (A) FBP/SHL, (B) FBP/TBE, (C) and TBE/SHL, classified in seven categories, as follows: red, unambiguous support (both methods recover values of 100%); orange, robust support (both methods recover values ≥ 90%, or ≥ 80% in one method and 100% in the other); blue, strong support (both methods recover values ≥ 80%, or values ≥ 70% in one method and ≥ 90% in the other); green, moderate support (both methods recover values ≥ 70% but do not reach values equal to previous categories); dark grey, ambiguous support (highly discrepant values, with < 70% in one method and ≥ 80% in the other) or poor support (values < 70% in one method and between 70% and 80% in the other method); light grey, unsupported (values < 70% for both methods). (XLSX) [file pone.0216148.s009.xlsx]

## Sheet: support_statistics2.txt
(A) FBP versus SHL combined supports by nodes									(B) FBP versus TBE combined supports by nodes									(C) SHL versus TBE combined supports by nodes
Taxa	no support (light grey)	poor/ambiguous support (dark grey)	moderate support (green)	strong support (blue)	robust support (orange)	unambiguous (red)	Total Nodes		Taxa	no support (light grey)	poor/ambiguous support (dark grey)	moderate support (green)	strong support (blue)	robust support (orange)	unambiguous (red)	Total Nodes		Taxa	no support (light grey)	poor/ambiguous support (dark grey)	moderate support (green)	strong support (blue)	robust support (orange)	unambiguous (red)	Total Nodes
Acrochordidae	0	0	0	1	0	1	2		Acrochordidae	0	0	0	0	1	1	2		Acrochordidae	0	0	0	1	0	1	2
Xenodermidae	0	0	1	1	0	2	4		Xenodermidae	0	0	1	1	0	2	4		Xenodermidae	0	0	1	1	0	2	4
Pareidae	1	1	0	2	7	0	11		Pareidae	1	1	0	5	3	1	11		Pareidae	0	2	0	1	8	0	11
Viperidae	27	38	8	25	70	78	246		Viperidae	13	47	9	26	51	100	246		Viperidae	7	37	11	27	83	81	246
Viperinae	11	6	4	9	16	23	69		Viperinae	5	13	3	9	12	27	69		Viperinae	4	11	3	8	20	23	69
Crotalinae	16	32	4	16	54	53	175		Crotalinae	8	34	6	17	39	71	175		Crotalinae	3	26	8	19	63	56	175
Homalopsidae	2	5	0	4	6	7	24		Homalopsidae	0	7	1	3	5	8	24		Homalopsidae	0	2	2	4	8	8	24
Psammophiidae	7	4	0	7	12	10	40		Psammophiidae	3	10	1	5	9	12	40		Psammophiidae	1	10	1	3	16	9	40
Atractaspididae	2	3	1	2	6	3	17		Atractaspididae	1	4	0	2	10	0	17		Atractaspididae	0	5	0	1	10	1	17
Atractaspidinae	2	1	1	0	2	0	6		Atractaspidinae	0	3	0	1	2	0	6		Atractaspidinae	0	2	0	1	3	0	6
Aparallactinae	0	2	0	2	3	3	10		Aparallactinae	1	1	0	1	7	0	10		Aparallactinae	0	3	0	0	7	0	10
Lamprophiidae	6	7	0	3	4	9	29		Lamprophiidae	4	11	0	2	3	9	29		Lamprophiidae	2	8	1	3	6	9	29
Pseudoxyrhophiidae	4	5	3	6	21	15	54		Pseudoxyrhophiidae	0	7	4	7	14	22	54		Pseudoxyrhophiidae	0	6	1	7	23	17	54
Elapidae	34	44	3	23	55	36	195		Elapidae	22	58	5	16	50	44	195		Elapidae	11	38	8	23	68	47	195
Hydrophiinae	20	28	1	14	30	27	120		Hydrophiinae	18	29	4	8	28	33	120		Hydrophiinae	8	23	6	15	35	33	120
Pseudoxenodontidae	0	0	0	0	2	1	3		Pseudoxenodontidae	0	0	0	0	0	3	3		Pseudoxenodontidae	0	0	0	0	2	1	3
Dipsadidae	42	76	8	31	52	29	238		Dipsadidae	38	81	7	31	40	41	238		Dipsadidae	18	51	13	39	89	28	238
Carphophiinae	0	1	0	0	0	1	2		Carphophiinae	0	1	0	0	0	1	2		Carphophiinae	0	0	0	1	0	1	2
Dipsadinae	16	25	2	7	8	8	66		Dipsadinae	10	33	0	9	6	8	66		Dipsadinae	7	14	1	18	20	6	66
Xenodontinae	26	47	6	23	40	18	160		Xenodontinae	27	45	7	22	31	28	160		Xenodontinae	11	36	12	20	62	19	160
Natricidae	9	9	6	14	31	19	88		Natricidae	2	13	5	18	27	23	88		Natricidae	2	10	4	14	33	25	88
Sibynophiidae	0	0	1	0	2	2	5		Sibynophiidae	0	0	0	1	1	3	5		Sibynophiidae	0	0	0	1	2	2	5
Calamariidae	0	0	0	1	0	1	2		Calamariidae	0	0	1	0	0	1	2		Calamariidae	0	0	0	1	0	1	2
Grayiidae	0	0	0	1	1	0	2		Grayiidae	0	0	0	0	2	0	2		Grayiidae	0	0	0	1	0	1	2
Colubridae	50	73	10	30	66	46	275		Colubridae	31	86	11	38	50	59	275		Colubridae	18	55	14	42	96	50	275
Higher Levels	5	8	2	1	3	3	22		Higher Level	2	11	0	3	3	3	22		Higher Level	1	5	0	5	7	4	22
Pseudaspididae	0	1	0	0	1	1	3		Pseudaspididae	1	0	0	0	1	1	3		Pseudaspididae	0	1	0	0	1	1	3
Prosymnidae	2	1	0	0	0	1	4		Prosymnidae	1	2	0	1	0	0	4		Prosymnidae	0	3	0	1	0	0	4
Total	191	275	43	152	339	264	1264		Total	119	338	45	159	270	333	1264		Total	60	233	56	175	452	288	1264
	15.1%	0.218	3.4%	0.12	0.268	20.9%				9.4%	26.7%	3.5%	12.5%	21.3%	26.3%				4.7%	18.4%	4.4%	13.8%	35.7%	22.7%
